# Supplementary material for: Surfaceome Proteomic of Glioblastoma Revealed Potential Targets for Immunotherapy
Source: Front Immunol. 2021 Sep 27;12:746168. doi: 10.3389/fimmu.2021.746168 (PMC8503648; doi:10.3389/fimmu.2021.746168)
Supplement: Supplementary Data Sheet 1 — Raw data before the application of any filters. [file DataSheet_1.xlsx]

## Sheet: Matrix_total
Ast-Biotin1	Ast-Biotin2	Ast-Biotin3	NCH82-Biotin1	NCH82-Biotin2	NCH82-Biotin3	U87-Biotin1	U87-Biotin2	U87-Biotin3	N: Peptides	N: Razor + unique peptides	N: Unique peptides	N: Sequence coverage [%]	N: Unique + razor sequence coverage [%]	N: Unique sequence coverage [%]	N: Mol. weight [kDa]	N: Q-value	N: Score	N: Intensity	N: MS/MS count	T: Protein IDs	T: Majority protein IDs	T: Protein names	T: Gene names	T: id
NaN	NaN	NaN	NaN	NaN	NaN	NaN	21.4234	NaN	1	1	1	36.6	36.6	36.6	7.6794	0	11.193	17768000	1	A0A0U1RRL7	A0A0U1RRL7			0
NaN	NaN	NaN	NaN	21.3401	NaN	21.6697	22.2206	23.0551	3	3	3	2.6	2.6	2.6	117.97	0	5.9595	112710000	3	A0AVT1;A0AVT1-2;A0AVT1-4;A0AVT1-3	A0AVT1;A0AVT1-2	Ubiquitin-like modifier-activating enzyme 6	UBA6	1
22.5507	23.3104	22.5202	22.6916	23.0653	23.0001	21.6972	22.7978	23.3732	11	11	11	21.3	21.3	21.3	98.9	0	39.739	299930000	20	A0FGR8-2;A0FGR8;A0FGR8-6;A0FGR8-5;A0FGR8-4	A0FGR8-2;A0FGR8;A0FGR8-6;A0FGR8-5	Extended synaptotagmin-2	ESYT2	2
NaN	NaN	NaN	NaN	NaN	NaN	NaN	NaN	21.2101	1	1	1	14.6	14.6	14.6	12.707	0.00078156	2.4391	54497000	3	A1KXE4-2;A1KXE4	A1KXE4-2;A1KXE4	Myelin-associated neurite-outgrowth inhibitor	FAM168B	3
NaN	21.423	22.7288	21.8821	NaN	20.6649	21.4656	21.8552	22.125	4	4	4	13	13	13	67.867	0	80.773	111730000	15	A1L0T0	A1L0T0	Acetolactate synthase-like protein	ILVBL	4
NaN	NaN	NaN	NaN	NaN	NaN	NaN	NaN	NaN	1	1	1	15.5	15.5	15.5	12.577	0.00075529	2.152	34714000	2	A4D1E9-3;A4D1E9-2;A4D1E9	A4D1E9-3;A4D1E9-2;A4D1E9	GTP-binding protein 10	GTPBP10	5
NaN	NaN	NaN	NaN	NaN	NaN	20.2201	NaN	NaN	1	1	1	3.4	3.4	3.4	38.658	0	4.3019	6080000	2	A5D8V6	A5D8V6	Vacuolar protein sorting-associated protein 37C	VPS37C	6
NaN	NaN	NaN	NaN	NaN	NaN	NaN	NaN	NaN	1	1	1	12.8	12.8	12.8	14.688	0.0028612	1.8473	55275000	5	Q9GZQ8;A6NCE7	Q9GZQ8;A6NCE7	Microtubule-associated proteins 1A/1B light chain 3B;Microtubule-associated proteins 1A/1B light chain 3 beta 2	MAP1LC3B;MAP1LC3B2	7
NaN	NaN	NaN	22.3773	NaN	20.1273	NaN	21.2753	21.124	3	3	3	16	16	16	33.62	0	9.1462	61737000	6	A6NDU8	A6NDU8	UPF0600 protein C5orf51	C5orf51	8
NaN	NaN	NaN	NaN	NaN	NaN	NaN	NaN	19.3074	1	1	1	3.2	3.2	3.2	40.078	0.0041725	1.6786	6986900	1	A6NED2	A6NED2	RCC1 domain-containing protein 1	RCCD1	9
NaN	NaN	NaN	NaN	NaN	NaN	22.0864	23.7287	NaN	4	4	4	7.2	7.2	7.2	90.622	0	7.2364	136370000	10	A6NFQ2-3;A6NFQ2-2;A6NFQ2	A6NFQ2-3;A6NFQ2-2;A6NFQ2	TRPM8 channel-associated factor 2	TCAF2	10
NaN	NaN	NaN	NaN	NaN	20.1831	NaN	NaN	NaN	1	1	1	3.5	3.5	3.5	39.064	0.0090756	1.4608	6061200	1	P0C7N4;A6NGB0	P0C7N4;A6NGB0	Transmembrane protein 191B;Transmembrane protein 191C	TMEM191B;TMEM191C	11
NaN	NaN	NaN	NaN	NaN	NaN	NaN	23.4842	NaN	2	2	2	6.8	6.8	6.8	39.419	0	65.57	95351000	6	P19440-2;A6NGU5;P19440;P36268-2;P36268;P36268-3	P19440-2;A6NGU5;P19440;P36268-2;P36268;P36268-3	Gamma-glutamyltranspeptidase 1;Gamma-glutamyltranspeptidase 1 heavy chain;Gamma-glutamyltranspeptidase 1 light chain;Putative gamma-glutamyltranspeptidase 3;Putative gamma-glutamyltranspeptidase 3 heavy chain;Putative gamma-glutamyltranspeptidase 3 light chain;Inactive gamma-glutamyltranspeptidase 2	GGT1;GGT3P;GGT2	12
NaN	NaN	NaN	NaN	NaN	NaN	NaN	NaN	NaN	2	1	1	6.6	3.3	3.3	34.803	0.00039651	2.5436	18558000	6	A6NHQ2	A6NHQ2	rRNA/tRNA 2-O-methyltransferase fibrillarin-like protein 1	FBLL1	13
NaN	NaN	NaN	NaN	NaN	21.323	NaN	NaN	NaN	4	4	4	2.3	2.3	2.3	226.37	0	4.8322	15559000	2	A6NHR9;A6NHR9-2;A6NHR9-3	A6NHR9;A6NHR9-2;A6NHR9-3	Structural maintenance of chromosomes flexible hinge domain-containing protein 1	SMCHD1	14
NaN	NaN	NaN	NaN	NaN	NaN	NaN	21.9745	20.7358	2	2	2	11.5	11.5	11.5	13.171	0	3.3435	46333000	3	A6ZKI3	A6ZKI3	Protein FAM127A	FAM127A	15
NaN	NaN	NaN	21.9888	21.5128	NaN	NaN	NaN	NaN	2	2	2	2.6	2.6	2.6	152	0	4.4323	22854000	4	A7MBM2	A7MBM2	Protein dispatched homolog 2	DISP2	16
NaN	NaN	NaN	NaN	NaN	NaN	NaN	NaN	20.27	1	1	1	2.7	2.7	2.7	42.233	0.0041422	1.6318	9492600	1	A8MXV4	A8MXV4	Nucleoside diphosphate-linked moiety X motif 19, mitochondrial	NUDT19	17
NaN	21.8267	NaN	23.8953	22.1778	22.3375	NaN	22.0829	21.4437	1	1	1	15.9	15.9	15.9	10.145	0	4.164	168130000	7	O95298-3;O95298-2;E9PQ53;O95298	O95298-3;O95298-2;E9PQ53;O95298	NADH dehydrogenase [ubiquinone] 1 subunit C2;NADH dehydrogenase [ubiquinone] 1 subunit C2, isoform 2	NDUFC2;NDUFC2-KCTD14	86
NaN	NaN	NaN	NaN	NaN	NaN	NaN	NaN	NaN	1	1	1	10.6	10.6	10.6	14.234	0.0087542	1.4732	12564000	1	E9PRG8	E9PRG8	Uncharacterized protein C11orf98	C11orf98	87
NaN	22.821	23.4063	23.5181	24.0899	22.9918	NaN	22.1767	23.225	8	8	8	19.9	19.9	19.9	72.911	0	18.749	268330000	20	O00116	O00116	Alkyldihydroxyacetonephosphate synthase, peroxisomal	AGPS	88
NaN	NaN	NaN	NaN	NaN	NaN	NaN	NaN	22.7739	7	2	2	26.2	12.4	12.4	49.129	0	8.7828	69171000	2	O00148;O00148-3;O00148-2	O00148	ATP-dependent RNA helicase DDX39A	DDX39A	89
23.2401	22.7271	23.0885	22.971	22.7473	23.0462	22.8424	22.9195	23.4161	6	6	6	28.9	28.9	28.9	36.071	0	15.247	358020000	34	O00151	O00151	PDZ and LIM domain protein 1	PDLIM1	90
22.9774	23.6243	22.8158	24.0195	23.2686	21.7694	23.4056	22.8617	23.8048	5	5	5	28.5	28.5	28.5	27.041	0	35.822	294260000	22	O00154-2;O00154-3;O00154-4;O00154-6;O00154-7;O00154;O00154-5	O00154-2;O00154-3;O00154-4;O00154-6;O00154-7;O00154;O00154-5	Cytosolic acyl coenzyme A thioester hydrolase	ACOT7	91
24.0605	22.5726	NaN	22.2561	22.8585	23.9908	23.1149	23.3632	NaN	22	22	22	26.9	26.9	26.9	117.91	0	194.69	607220000	43	O00159-2;O00159-3;O00159	O00159-2;O00159-3;O00159	Unconventional myosin-Ic	MYO1C	92
NaN	NaN	NaN	NaN	NaN	NaN	NaN	20.4067	NaN	2	2	2	14.6	14.6	14.6	17.789	0	3.3808	30986000	2	O00161-2;O00161	O00161-2;O00161	Synaptosomal-associated protein 23	SNAP23	93
NaN	NaN	NaN	22.5958	NaN	NaN	NaN	NaN	NaN	4	4	4	27.7	27.7	27.7	26.099	0	7.2209	47240000	6	O00165-5;O00165;O00165-2;O00165-3;O00165-4;O00165-6	O00165-5;O00165;O00165-2;O00165-3	HCLS1-associated protein X-1	HAX1	94
NaN	21.4441	NaN	21.4747	NaN	NaN	NaN	21.9462	22.744	3	3	3	16.4	16.4	16.4	37.636	0	6.824	97721000	5	O00170	O00170	AH receptor-interacting protein	AIP	95
NaN	NaN	NaN	NaN	NaN	NaN	NaN	NaN	NaN	1	1	1	4.6	4.6	4.6	72.453	0	2.6906	11368000	0	O00178	O00178	GTP-binding protein 1	GTPBP1	96
NaN	NaN	NaN	NaN	NaN	NaN	NaN	NaN	19.7163	1	1	1	4.6	4.6	4.6	67.764	0	6.579	11443000	6	O00186	O00186	Syntaxin-binding protein 3	STXBP3	97
23.1984	23.2641	22.9516	22.9036	23.572	NaN	22.8015	23.8992	23.6754	2	2	2	26.8	26.8	26.8	20.332	0	30.999	303760000	12	O00193	O00193	Small acidic protein	SMAP	98
NaN	NaN	NaN	21.546	NaN	21.0974	21.4916	23.0924	21.731	3	3	3	10.4	10.4	10.4	35.808	0	5.3079	110250000	5	O00214;O00214-2	O00214;O00214-2	Galectin-8	LGALS8	99
NaN	NaN	NaN	22.8745	NaN	22.5037	NaN	NaN	21.9177	4	4	4	34.3	34.3	34.3	23.705	0	53.889	110640000	21	O00217	O00217	NADH dehydrogenase [ubiquinone] iron-sulfur protein 8, mitochondrial	NDUFS8	100
NaN	NaN	22.9042	22.7403	NaN	21.8401	22.9635	22.2544	23.9586	3	3	3	10.4	10.4	10.4	47.463	0	73.209	231100000	16	O00231;O00231-2	O00231;O00231-2	26S proteasome non-ATPase regulatory subunit 11	PSMD11	101
NaN	NaN	NaN	21.0889	NaN	NaN	NaN	NaN	22.131	4	4	4	11	11	11	52.904	0	7.8286	56130000	7	O00232;O00232-2	O00232;O00232-2	26S proteasome non-ATPase regulatory subunit 12	PSMD12	102
22.4728	23.1431	23.832	23.8231	23.7987	22.934	22.2431	23.6285	23.7955	7	7	7	30.3	30.3	30.3	21.671	0	22.361	352350000	30	O00264;O00264-2	O00264;O00264-2	Membrane-associated progesterone receptor component 1	PGRMC1	103
NaN	NaN	NaN	NaN	NaN	NaN	NaN	NaN	NaN	2	2	2	3.2	3.2	3.2	110.11	0	3.4789	12062000	1	O00268	O00268	Transcription initiation factor TFIID subunit 4	TAF4	104
23.8741	26.5623	24.9627	25.7885	26.487	25.1153	24.6253	26.9807	29.0772	25	25	25	82.2	82.2	82.2	26.922	0	323.31	4953800000	149	O00299	O00299	Chloride intracellular channel protein 1	CLIC1	105
NaN	NaN	NaN	21.9649	NaN	NaN	NaN	NaN	NaN	1	1	1	6.2	6.2	6.2	37.563	0.00039714	2.552	36957000	2	O00303	O00303	Eukaryotic translation initiation factor 3 subunit F	EIF3F	106
NaN	22.6966	NaN	21.7687	21.8266	23.3503	23.8935	21.9219	NaN	7	7	7	14.8	14.8	14.8	102.23	0	21.715	207870000	22	O00339-3;O00339;O00339-2;O00339-4	O00339-3;O00339;O00339-2;O00339-4	Matrilin-2	MATN2	107
NaN	22.2675	NaN	NaN	NaN	NaN	NaN	NaN	NaN	3	3	3	6.2	6.2	6.2	82.577	0	2.9951	22215000	4	O00391;O00391-2	O00391;O00391-2	Sulfhydryl oxidase 1	QSOX1	108
23.7716	24.7041	24.3582	25.3079	24.1866	22.0815	23.4197	24.3079	24.1231	9	9	8	13.9	13.9	13.2	123.63	0	323.31	571670000	40	O00410;O00410-2;O00410-3	O00410;O00410-2;O00410-3	Importin-5	IPO5	109
NaN	NaN	NaN	NaN	NaN	NaN	NaN	NaN	NaN	1	1	1	1.7	1.7	1.7	89.86	0.0051493	1.5946	28272000	3	O00423;O00423-3	O00423;O00423-3	Echinoderm microtubule-associated protein-like 1	EML1	110
23.0886	NaN	NaN	NaN	NaN	22.8185	23.1242	22.1045	NaN	6	6	4	12.6	12.6	9.7	63.704	0	69.899	144650000	20	O00425;O00425-2;Q9NZI8-2;Q9NZI8	O00425;O00425-2	Insulin-like growth factor 2 mRNA-binding protein 3	IGF2BP3	111
23.0881	21.5162	NaN	NaN	NaN	NaN	NaN	NaN	NaN	10	10	10	8.1	8.1	8.1	205.52	0	20.182	55998000	21	O00468-2;O00468-6;O00468-3;O00468-5;O00468-4;O00468-7;O00468	O00468-2;O00468-6;O00468-3;O00468-5;O00468-4;O00468-7;O00468	Agrin;Agrin N-terminal 110 kDa subunit;Agrin C-terminal 110 kDa subunit;Agrin C-terminal 90 kDa fragment;Agrin C-terminal 22 kDa fragment	AGRN	112
22.9301	23.3376	22.8558	23.1393	22.7872	23.6867	22.0916	24.5271	23.3445	12	12	12	18.6	18.6	18.6	87.097	0	106.09	432040000	43	O00469-2;O00469;O00469-3	O00469-2;O00469	Procollagen-lysine,2-oxoglutarate 5-dioxygenase 2	PLOD2	113
NaN	NaN	NaN	NaN	NaN	NaN	NaN	NaN	20.4203	1	1	1	1.8	1.8	1.8	81.852	0	5.5487	33294000	4	O00471	O00471	Exocyst complex component 5	EXOC5	114
NaN	NaN	NaN	22.3717	21.9817	NaN	21.9234	22.9821	NaN	5	5	3	14	14	10.1	59.687	0	20.826	119750000	8	O00478-2;O00478;O00481-2;O00481-3	O00478-2;O00478	Butyrophilin subfamily 3 member A3	BTN3A3	115
NaN	NaN	NaN	21.182	21.405	NaN	NaN	21.4726	NaN	5	3	3	10.2	5.6	5.6	52.018	0	4.5972	37161000	4	O00481-4;O00481	O00481-4;O00481	Butyrophilin subfamily 3 member A1	BTN3A1	116
NaN	NaN	NaN	NaN	NaN	NaN	NaN	NaN	21.0843	1	1	1	12.3	12.3	12.3	9.3697	0.0038354	1.6947	75491000	6	O00483	O00483	Cytochrome c oxidase subunit NDUFA4	NDUFA4	117
NaN	NaN	NaN	NaN	NaN	NaN	NaN	NaN	22.5354	2	2	2	15.5	15.5	15.5	34.577	0	11.695	44502000	3	O00487	O00487	26S proteasome non-ATPase regulatory subunit 14	PSMD14	118
22.6405	19.7005	NaN	20.7881	19.998	24.7369	23.8436	NaN	NaN	7	7	7	13.4	13.4	13.4	67.455	0	29.811	249480000	24	O00541-2;O00541	O00541-2;O00541	Pescadillo homolog	PES1	119
NaN	NaN	NaN	NaN	NaN	NaN	NaN	NaN	NaN	1	1	1	3.4	3.4	3.4	31.761	0	5.2723	109640000	14	O00560-3;O00560-2;O00560	O00560-3;O00560-2;O00560	Syntenin-1	SDCBP	120
NaN	NaN	NaN	NaN	NaN	20.5779	21.9422	22.7574	NaN	5	5	5	6.1	6.1	6.1	134.77	0	7.683	76762000	6	O00562-2;O00562	O00562-2;O00562	Membrane-associated phosphatidylinositol transfer protein 1	PITPNM1	121
20.8604	NaN	NaN	NaN	NaN	23.6714	22.1358	NaN	NaN	7	7	7	17.8	17.8	17.8	78.863	0	54.164	121220000	13	O00566	O00566	U3 small nucleolar ribonucleoprotein protein MPP10	MPHOSPH10	122
26.1088	NaN	NaN	24.2185	NaN	27.5247	26.2274	21.9613	23.7252	30	30	30	54.5	54.5	54.5	66.049	0	228.13	1756800000	121	O00567	O00567	Nucleolar protein 56	NOP56	123
24.1628	24.7186	23.926	24.3791	24.5835	25.0669	24.7912	24.2989	24.5874	15	15	6	30.4	30.4	16.9	73.243	0	260.23	933680000	82	O00571;O00571-2;O15523-3	O00571;O00571-2	ATP-dependent RNA helicase DDX3X	DDX3X	124
NaN	NaN	NaN	22.3737	21.7208	NaN	NaN	NaN	NaN	3	3	3	9.7	9.7	9.7	42.026	0	7.5123	37834000	6	O00622	O00622	Protein CYR61	CYR61	125
NaN	NaN	NaN	NaN	NaN	NaN	NaN	NaN	21.5468	1	1	1	4.6	4.6	4.6	32.532	0	3.0244	70632000	5	O00743-2;O00743;O00743-3	O00743-2;O00743;O00743-3	Serine/threonine-protein phosphatase 6 catalytic subunit;Serine/threonine-protein phosphatase 6 catalytic subunit, N-terminally processed	PPP6C	126
NaN	NaN	NaN	NaN	NaN	NaN	NaN	NaN	20.5714	1	1	1	7.1	7.1	7.1	26.827	0.0014663	2	26061000	1	O00764-3;O00764-2;O00764	O00764-3;O00764-2;O00764	Pyridoxal kinase	PDXK	127
NaN	NaN	NaN	NaN	NaN	NaN	NaN	23.2203	23.3986	2	2	2	10.6	10.6	10.6	41.522	0	81.512	202240000	28	O00767	O00767	Acyl-CoA desaturase	SCD	128
NaN	NaN	NaN	21.1655	NaN	NaN	NaN	23.1256	NaN	3	3	3	19.3	19.3	19.3	35.116	0	14.525	79515000	5	O14495	O14495	Lipid phosphate phosphohydrolase 3	PPAP2B	129
NaN	NaN	NaN	NaN	NaN	20.9625	NaN	NaN	NaN	2	2	2	1.7	1.7	1.7	205.92	0	2.6491	19079000	2	O14497-3;O14497-2;O14497	O14497-3;O14497-2;O14497	AT-rich interactive domain-containing protein 1A	ARID1A	130
NaN	23.9194	23.1606	NaN	21.9032	NaN	NaN	NaN	NaN	2	2	2	3.3	3.3	3.3	76.18	0.00077459	2.3489	35718000	3	O14523;O14523-2	O14523;O14523-2	C2 domain-containing protein 2-like	C2CD2L	131
23.8098	25.0653	25.0853	NaN	NaN	NaN	NaN	23.7205	23.4477	7	7	7	67.5	67.5	67.5	17.135	0	21.065	250900000	18	O14558	O14558	Heat shock protein beta-6	HSPB6	132
NaN	NaN	NaN	NaN	NaN	NaN	NaN	20.0628	NaN	1	1	1	5.4	5.4	5.4	23.973	0	7.2346	10832000	4	O14569	O14569	Cytochrome b561 domain-containing protein 2	CYB561D2	133
NaN	NaN	NaN	NaN	NaN	NaN	NaN	21.5762	NaN	1	1	1	0.9	0.9	0.9	177.03	0.0041465	1.6383	32762000	4	O14578-3;O14578;O14578-4	O14578-3;O14578;O14578-4	Citron Rho-interacting kinase	CIT	134
NaN	NaN	NaN	22.1074	NaN	22.4733	NaN	22.1751	22.1209	3	3	3	12.9	12.9	12.9	28.772	0	4.2198	128700000	11	O14579-3;O14579;O14579-2	O14579-3;O14579;O14579-2	Coatomer subunit epsilon	COPE	135
21.1693	NaN	NaN	NaN	NaN	NaN	21.3217	22.2624	24.0734	3	3	3	13.9	13.9	13.9	29.04	0	4.4294	172640000	6	O14618	O14618	Copper chaperone for superoxide dismutase	CCS	136
NaN	NaN	NaN	NaN	NaN	21.7055	NaN	NaN	NaN	2	2	2	2.6	2.6	2.6	200.56	0	13.413	21129000	2	O14647-2;O14647;O14646-2;O14646	O14647-2;O14647;O14646-2;O14646	Chromodomain-helicase-DNA-binding protein 2;Chromodomain-helicase-DNA-binding protein 1	CHD2;CHD1	137
NaN	NaN	NaN	21.4628	NaN	22.6574	NaN	22.6677	NaN	3	3	3	27.2	27.2	27.2	22.724	0	20.165	181810000	10	O14653-3;O14653;O14653-2	O14653-3;O14653;O14653-2	Golgi SNAP receptor complex member 2	GOSR2	138
NaN	NaN	NaN	NaN	NaN	NaN	NaN	NaN	17.5124	1	1	1	3.9	3.9	3.9	37.808	0.0077624	1.4838	23971000	1	O14656	O14656	Torsin-1A	TOR1A	139
NaN	NaN	NaN	22.0019	NaN	20.8433	NaN	NaN	21.8398	5	5	5	22.7	22.7	22.7	36.544	0	22.789	69423000	9	O14662-5;O14662;O14662-2;O14662-4;O14662-3;O14662-6	O14662-5;O14662;O14662-2;O14662-4	Syntaxin-16	STX16	140
23.0033	25.0421	24.1967	24.9369	24.9882	21.5254	22.573	27.2406	26.4435	18	18	18	30.5	30.5	30.5	84.141	0	323.31	1878600000	107	O14672;O14672-2	O14672;O14672-2	Disintegrin and metalloproteinase domain-containing protein 10	ADAM10	141
NaN	NaN	NaN	NaN	NaN	NaN	NaN	NaN	18.8994	1	1	1	4	4	4	37.461	0	67.249	31757000	7	O14681-3;O14681	O14681-3;O14681	Etoposide-induced protein 2.4 homolog	EI24	142
NaN	NaN	NaN	NaN	NaN	NaN	NaN	NaN	NaN	1	1	1	6.6	6.6	6.6	17.102	0	5.2708	32363000	2	O14684	O14684	Prostaglandin E synthase	PTGES	143
NaN	NaN	NaN	NaN	NaN	NaN	NaN	NaN	21.7147	1	1	1	7.2	7.2	7.2	35.914	0.00076278	2.2132	60138000	1	O14734	O14734	Acyl-coenzyme A thioesterase 8	ACOT8	144
NaN	24.8369	NaN	NaN	NaN	NaN	NaN	NaN	23.16	4	4	4	28.8	28.8	28.8	14.285	0	28.749	150410000	9	O14737;O14737-2	O14737;O14737-2	Programmed cell death protein 5	PDCD5	145
NaN	NaN	NaN	21.4449	NaN	20.912	NaN	NaN	NaN	3	3	3	10.3	10.3	10.3	53.579	0	2.836	35288000	4	O14744-4;O14744-2;O14744;O14744-3;O14744-5	O14744-4;O14744-2;O14744;O14744-3;O14744-5	Protein arginine N-methyltransferase 5;Protein arginine N-methyltransferase 5, N-terminally processed	PRMT5	146
NaN	23.471	23.0008	NaN	NaN	NaN	NaN	NaN	NaN	2	2	2	17.3	17.3	17.3	22.034	0	8.4165	52099000	6	O14745-2;O14745	O14745-2;O14745	Na(+)/H(+) exchange regulatory cofactor NHE-RF1	SLC9A3R1	147
22.6377	23.0889	NaN	24.1246	22.8641	NaN	22.7847	26.0118	24.548	9	9	9	29.1	29.1	29.1	47.878	0	323.31	797360000	56	O14763;O14763-2;O14763-3	O14763;O14763-2	Tumor necrosis factor receptor superfamily member 10B	TNFRSF10B	148
23.8172	24.0797	22.4804	23.8555	23.89	21.7868	23.0292	23.9494	23.7704	3	3	3	13.1	13.1	13.1	34.463	0	73.923	440830000	20	O14773-2;O14773	O14773-2;O14773	Tripeptidyl-peptidase 1	TPP1	149
NaN	22.937	NaN	NaN	23.4925	23.6434	NaN	23.2128	NaN	5	5	5	6.1	6.1	6.1	121.69	0	11.501	249360000	14	O14776-2;O14776	O14776-2;O14776	Transcription elongation regulator 1	TCERG1	150
24.1996	24.1779	24.6042	24.1683	24.5393	21.8839	24.3376	26.1153	24.8202	14	14	14	16.8	16.8	16.8	103.13	0	323.31	877720000	70	O14786;O14786-3;O14786-2	O14786;O14786-3;O14786-2	Neuropilin-1	NRP1	151
NaN	NaN	NaN	26.9828	27.0613	23.219	NaN	NaN	NaN	2	2	2	23.9	23.9	23.9	15.03	0	3.7361	866170000	23	O14810	O14810	Complexin-1	CPLX1	152
NaN	NaN	NaN	NaN	NaN	NaN	NaN	21.6108	NaN	1	1	1	10.5	10.5	10.5	26.118	0	6.0993	49421000	3	O14817	O14817	Tetraspanin-4	TSPAN4	153
NaN	NaN	NaN	24.0801	NaN	22.5024	NaN	NaN	22.792	3	3	3	25.4	25.4	25.4	27.887	0	8.6916	146940000	5	O14818;O14818-2;Q8TAA3-2;Q8TAA3-5;Q8TAA3;O14818-4	O14818;O14818-2;Q8TAA3-2;Q8TAA3-5;Q8TAA3	Proteasome subunit alpha type-7;Proteasome subunit alpha type-7-like	PSMA7;PSMA8	154
24.7053	25.2992	25.7127	26.754	25.8545	24.5823	24.3543	25.6826	25.346	8	8	8	39.5	39.5	39.5	38.287	0	323.31	1500400000	67	O14828;O14828-2	O14828;O14828-2	Secretory carrier-associated membrane protein 3	SCAMP3	155
NaN	NaN	NaN	NaN	NaN	NaN	NaN	NaN	18.5927	2	2	2	1.9	1.9	1.9	137.46	0.0093991	1.4555	1894800000	2	O14841	O14841	5-oxoprolinase	OPLAH	156
22.1016	NaN	NaN	NaN	NaN	24.2017	22.0481	NaN	NaN	7	7	7	23.8	23.8	23.8	46.36	0	21.808	125640000	10	O14874;O14874-2;O14874-3	O14874;O14874-2;O14874-3	[3-methyl-2-oxobutanoate dehydrogenase [lipoamide]] kinase, mitochondrial	BCKDK	157
NaN	NaN	NaN	NaN	NaN	NaN	NaN	20.3821	NaN	1	1	1	15.8	15.8	15.8	16.516	0	3.7805	8632400	1	O14880	O14880	Microsomal glutathione S-transferase 3	MGST3	158
NaN	NaN	NaN	NaN	NaN	NaN	NaN	NaN	21.732	2	2	2	13.9	13.9	13.9	21.943	0	3.2347	29205000	3	O14925;Q5SRD1	O14925;Q5SRD1	Mitochondrial import inner membrane translocase subunit Tim23;Putative mitochondrial import inner membrane translocase subunit Tim23B	TIMM23;TIMM23B	159
NaN	NaN	NaN	NaN	NaN	NaN	NaN	22.0354	NaN	2	2	2	11.4	11.4	11.4	39.786	0	11.766	73056000	4	O14929-2;O14929	O14929-2;O14929	Histone acetyltransferase type B catalytic subunit	HAT1	160
NaN	NaN	NaN	NaN	NaN	NaN	NaN	NaN	24.2994	1	1	1	6.5	6.5	6.5	19.044	0	9.4301	282090000	8	O14944	O14944	Proepiregulin;Epiregulin	EREG	161
22.1916	23.6441	23.2574	23.8985	24.2331	23.4136	22.7952	24.0474	23.0004	3	3	3	26.8	26.8	26.8	9.9062	0	66.783	396810000	33	O14949	O14949	Cytochrome b-c1 complex subunit 8	UQCRQ	162
24.2582	NaN	23.7129	25.5398	NaN	26.0108	23.5343	NaN	22.9017	9	9	7	54.4	54.4	33.3	19.794	0	323.31	3363500000	74	P19105;O14950	P19105;O14950	Myosin regulatory light chain 12A;Myosin regulatory light chain 12B	MYL12A;MYL12B	163
NaN	NaN	NaN	NaN	NaN	NaN	NaN	NaN	22.3346	1	1	1	3.3	3.3	3.3	70.038	0	55.066	50904000	5	O14967	O14967	Calmegin	CLGN	164
23.4098	NaN	NaN	NaN	20.8682	21.3539	NaN	NaN	20.8004	4	4	4	4.6	4.6	4.6	109.1	0	6.0231	83453000	8	O14974-4;O14974-3;O14974-2;O14974;O14974-5	O14974-4;O14974-3;O14974-2;O14974;O14974-5	Protein phosphatase 1 regulatory subunit 12A	PPP1R12A	165
NaN	NaN	NaN	NaN	NaN	23.3472	23.2651	NaN	NaN	4	4	3	20.1	20.1	16	27.191	0	53.338	80700000	11	O14979-3;O14979-2;O14979	O14979-3;O14979-2;O14979	Heterogeneous nuclear ribonucleoprotein D-like	HNRNPDL	166
23.456	23.8641	24.4377	24.5298	24.4569	23.5823	23.7736	23.769	23.3359	8	8	8	12.7	12.7	12.7	123.38	0	73.889	467560000	29	O14980	O14980	Exportin-1	XPO1	167
23.1921	NaN	NaN	23.1031	NaN	24.2388	23.8657	22.5809	NaN	11	11	11	11.7	11.7	11.7	251.89	0	38.019	273540000	29	O15027;O15027-5;O15027-2;O15027-4;O15027-3	O15027;O15027-5;O15027-2;O15027-4;O15027-3	Protein transport protein Sec16A	SEC16A	168
23.4409	23.4966	22.7436	24.0312	24.2733	21.8129	NaN	23.9313	22.5778	9	9	9	7.2	7.2	7.2	205.12	0	98.501	351710000	39	O15031	O15031	Plexin-B2	PLXNB2	169
21.6623	NaN	NaN	NaN	NaN	21.1146	21.4649	NaN	NaN	6	6	6	10	10	10	118.29	0	16.334	59852000	8	O15042;O15042-2;O15042-3	O15042;O15042-2	U2 snRNP-associated SURP motif-containing protein	U2SURP	170
21.7848	NaN	NaN	22.7351	21.5879	21.4493	21.978	22.6106	22.5923	7	7	7	8.4	8.4	8.4	144.73	0	34.099	167040000	18	O15067	O15067	Phosphoribosylformylglycinamidine synthase	PFAS	171
NaN	NaN	NaN	NaN	NaN	21.2503	NaN	NaN	NaN	2	2	2	4.9	4.9	4.9	81.099	0	5.7638	23855000	4	O15075-2;O15075	O15075-2;O15075	Serine/threonine-protein kinase DCLK1	DCLK1	172
NaN	NaN	NaN	NaN	NaN	20.8939	NaN	21.4484	21.6669	3	3	3	3.6	3.6	3.6	142.17	0.00075273	2.1278	56234000	6	O15118;O15118-2	O15118;O15118-2	Niemann-Pick C1 protein	NPC1	173
NaN	NaN	NaN	22.9609	NaN	NaN	21.7916	23.6889	22.1109	3	3	3	13.6	13.6	13.6	37.866	0	52.937	155060000	10	O15121	O15121	Sphingolipid delta(4)-desaturase DES1	DEGS1	174
NaN	NaN	NaN	NaN	NaN	NaN	NaN	20.7934	NaN	1	1	1	8	8	8	37.92	0	12.394	56002000	3	O15126	O15126	Secretory carrier-associated membrane protein 1	SCAMP1	175
NaN	NaN	NaN	22.3107	21.4938	NaN	21.2373	NaN	NaN	2	2	2	9.7	9.7	9.7	36.648	0	7.1154	101750000	6	O15127	O15127	Secretory carrier-associated membrane protein 2	SCAMP2	176
NaN	NaN	NaN	21.1158	NaN	21.5611	21.506	NaN	NaN	3	3	3	9.1	9.1	9.1	40.949	0.0014556	1.9559	45541000	2	O15143	O15143	Actin-related protein 2/3 complex subunit 1B	ARPC1B	177
NaN	NaN	NaN	NaN	NaN	NaN	NaN	NaN	NaN	2	2	2	6.3	6.3	6.3	34.333	0.0031847	1.8021	35611000	1	O15144	O15144	Actin-related protein 2/3 complex subunit 2	ARPC2	178
22.0988	22.3992	NaN	22.8426	NaN	22.8607	22.6849	22.2046	22.5756	3	3	3	20.8	20.8	20.8	20.546	0	8.4923	194750000	14	O15145	O15145	Actin-related protein 2/3 complex subunit 3	ARPC3	179
NaN	NaN	NaN	NaN	NaN	20.7219	NaN	NaN	NaN	2	2	2	11.4	11.4	11.4	38.646	0	4.8018	8805100	3	O15160-2;O15160	O15160-2;O15160	DNA-directed RNA polymerases I and III subunit RPAC1	POLR1C	180
NaN	22.4779	NaN	23.3565	22.3805	21.0253	21.6846	22.9859	22.1885	5	5	5	22.9	22.9	22.9	23.818	0	25.249	180520000	9	O15173;O15173-2	O15173;O15173-2	Membrane-associated progesterone receptor component 2	PGRMC2	181
NaN	NaN	NaN	NaN	NaN	NaN	NaN	NaN	20.6261	1	1	1	4.1	4.1	4.1	35.895	0.00077071	2.3095	50709000	10	P84022-3;P84022-2;P84022;O15198-2;Q15796-2;Q15796;O15198	P84022-3;P84022-2;P84022;O15198-2;Q15796-2;Q15796;O15198	Mothers against decapentaplegic homolog 3;Mothers against decapentaplegic homolog 9;Mothers against decapentaplegic homolog 2	SMAD3;SMAD9;SMAD2	182
NaN	NaN	NaN	23.0885	NaN	22.1518	NaN	22.5211	23.5433	4	4	4	55	55	55	14.582	0	7.5575	201220000	9	O15212	O15212	Prefoldin subunit 6	PFDN6	183
23.4524	NaN	NaN	22.3378	NaN	24.529	23.9933	NaN	21.9469	7	7	7	24.1	24.1	24.1	68.07	0	62.267	329930000	31	O15213	O15213	WD repeat-containing protein 46	WDR46	184
23.5647	NaN	NaN	NaN	NaN	23.1743	NaN	NaN	NaN	5	5	5	12.6	12.6	12.6	77.672	0	33.059	128820000	12	O15226;O15226-2	O15226;O15226-2	NF-kappa-B-repressing factor	NKRF	185
NaN	NaN	NaN	NaN	NaN	19.6264	NaN	NaN	NaN	1	1	1	2.6	2.6	2.6	69.574	0.00217	1.9233	4120600	1	O15254-2;O15254	O15254-2;O15254	Peroxisomal acyl-coenzyme A oxidase 3	ACOX3	186
NaN	NaN	NaN	NaN	NaN	18.4296	NaN	NaN	NaN	1	1	1	9.7	9.7	9.7	22.958	0	2.7297	13184000	2	O15258	O15258	Protein RER1	RER1	187
NaN	NaN	NaN	22.7943	NaN	21.1575	21.689	22.3262	NaN	3	3	3	11.5	11.5	11.5	30.394	0	29.567	95290000	11	O15260;O15260-2;O15260-3	O15260;O15260-2;O15260-3	Surfeit locus protein 4	SURF4	188
22.2313	22.5044	NaN	22.6828	22.7802	22.0077	22.208	22.6395	22.4491	3	3	3	12.1	12.1	12.1	52.743	0	14.977	173450000	14	O15269;O15269-2	O15269	Serine palmitoyltransferase 1	SPTLC1	189
NaN	NaN	NaN	21.8263	NaN	21.2462	NaN	NaN	22.0383	3	3	3	6	6	6	116.92	0	54.82	86205000	5	O15294;O15294-4;O15294-2;O15294-3	O15294;O15294-4;O15294-2;O15294-3	UDP-N-acetylglucosamine--peptide N-acetylglucosaminyltransferase 110 kDa subunit	OGT	190
NaN	NaN	NaN	NaN	NaN	NaN	NaN	NaN	19.9909	1	1	1	5.7	5.7	5.7	28.082	0.00078247	2.4434	16645000	2	O15305	O15305	Phosphomannomutase 2	PMM2	191
NaN	NaN	NaN	NaN	NaN	NaN	NaN	20.9599	NaN	1	1	1	5.1	5.1	5.1	55.25	0.0074425	1.492	28510000	2	O15321-2;O15321	O15321-2;O15321	Transmembrane 9 superfamily member 1	TM9SF1	192
NaN	NaN	NaN	23.7035	22.2265	NaN	21.8018	22.5123	21.5729	2	2	2	5.4	5.4	5.4	62.287	0	5.9116	144300000	5	O15344-2;O15344	O15344-2;O15344	E3 ubiquitin-protein ligase Midline-1	MID1	193
NaN	22.3086	NaN	23.5051	22.8086	22.1769	22.5149	23.1644	23.0417	5	5	5	15.6	15.6	15.6	59.271	0	63.159	262620000	20	O15355	O15355	Protein phosphatase 1G	PPM1G	194
NaN	NaN	NaN	NaN	19.8283	NaN	NaN	NaN	NaN	2	2	2	3.2	3.2	3.2	113.18	0	3.4254	9044700	3	O15357-2;O15357	O15357-2;O15357	Phosphatidylinositol 3,4,5-trisphosphate 5-phosphatase 2	INPPL1	195
NaN	NaN	NaN	NaN	NaN	NaN	22.1622	NaN	NaN	2	2	2	8.8	8.8	8.8	58.14	0.0007516	2.1165	39313000	5	O15371-2;O15371-3;O15371	O15371-2;O15371-3;O15371	Eukaryotic translation initiation factor 3 subunit D	EIF3D	196
NaN	NaN	NaN	NaN	NaN	NaN	NaN	19.0251	NaN	1	1	1	23	23	23	8.4896	0.0025243	1.8974	24237000	1	O15392-7;O15392-6;O15392-5;O15392-4;O15392-3;O15392;O15392-2	O15392-7;O15392-6;O15392-5;O15392-4;O15392-3;O15392;O15392-2	Baculoviral IAP repeat-containing protein 5	BIRC5	197
NaN	NaN	NaN	NaN	NaN	NaN	NaN	22.8513	NaN	2	2	2	2.9	2.9	2.9	93.045	0	46.216	56110000	6	O15394;O15394-2	O15394;O15394-2	Neural cell adhesion molecule 2	NCAM2	198
23.5524	23.7378	NaN	NaN	NaN	NaN	NaN	24.228	NaN	1	1	1	5.2	5.2	5.2	49.469	0	15.566	150650000	2	O15427	O15427	Monocarboxylate transporter 4	SLC16A3	199
NaN	NaN	NaN	NaN	NaN	NaN	NaN	NaN	20.179	1	1	1	10	10	10	21.09	0	4.8054	68515000	3	O15431	O15431	High affinity copper uptake protein 1	SLC31A1	200
NaN	NaN	NaN	NaN	NaN	21.5799	22.2994	NaN	NaN	2	2	2	7.5	7.5	7.5	54.985	0	18.03	72757000	10	O15446;O15446-2	O15446;O15446-2	DNA-directed RNA polymerase I subunit RPA34	CD3EAP	201
NaN	NaN	NaN	22.4722	NaN	22.5231	NaN	22.2514	22.4921	5	5	5	15.4	15.4	15.4	60.632	0	22.522	133600000	11	O15460-2;O15460	O15460-2;O15460	Prolyl 4-hydroxylase subunit alpha-2	P4HA2	202
NaN	NaN	NaN	NaN	NaN	NaN	NaN	21.0062	21.6116	2	2	2	8.1	8.1	8.1	73.168	0	3.4151	40638000	2	O15484	O15484	Calpain-5	CAPN5	203
NaN	NaN	NaN	NaN	NaN	NaN	NaN	NaN	NaN	10	1	1	17.7	1.5	1.5	72.931	0.0028623	1.8487	5713100	1	O15523-2;O15523	O15523-2;O15523	ATP-dependent RNA helicase DDX3Y	DDX3Y	204
NaN	NaN	NaN	22.854	NaN	NaN	NaN	23.1288	NaN	3	3	3	16.3	16.3	16.3	43.885	0	9.5436	123580000	7	O15533-2;O15533;O15533-3;O15533-4	O15533-2;O15533;O15533-3	Tapasin	TAPBP	205
24.5656	NaN	NaN	22.5705	NaN	26.3545	24.9442	NaN	24.089	27	27	26	40.1	40.1	39	90.932	0	77.193	733960000	58	O43143;O60231	O43143	Pre-mRNA-splicing factor ATP-dependent RNA helicase DHX15	DHX15	206
22.0951	NaN	22.0908	NaN	21.9491	21.8684	22.2216	NaN	22.1276	3	3	3	13	13	13	54.843	0.00076511	2.2486	109370000	6	O43148;O43148-2	O43148;O43148-2	mRNA cap guanine-N7 methyltransferase	RNMT	207
NaN	NaN	NaN	NaN	NaN	NaN	NaN	21.3503	NaN	2	2	2	5.2	5.2	5.2	74.048	0.0011152	2.0589	20315000	2	O43155	O43155	Leucine-rich repeat transmembrane protein FLRT2	FLRT2	208
22.3786	NaN	NaN	NaN	NaN	23.0144	22.7392	NaN	NaN	5	5	5	17.5	17.5	17.5	50.714	0	12.89	133180000	16	O43159	O43159	Ribosomal RNA-processing protein 8	RRP8	209
NaN	NaN	24.1065	21.6799	NaN	21.7234	23.3151	22.7902	24.1327	3	3	3	35.3	35.3	35.3	16.694	0	30.501	254310000	10	O43169	O43169	Cytochrome b5 type B	CYB5B	210
25.7067	26.9413	26.4694	29.5512	28.8656	27.0372	26.245	26.7722	26.0323	29	29	29	61.5	61.5	61.5	56.65	0	323.31	6937500000	328	O43175	O43175	D-3-phosphoglycerate dehydrogenase	PHGDH	211
NaN	NaN	NaN	NaN	NaN	NaN	NaN	19.7866	NaN	1	1	1	3.3	3.3	3.3	51.328	0	3.1438	6489900	1	O43194	O43194	G-protein coupled receptor 39	GPR39	212
NaN	NaN	NaN	21.6022	NaN	21.1565	21.5082	20.7943	21.4807	7	7	7	22.7	22.7	22.7	60.977	0	8.723	69048000	8	O43242;O43242-2	O43242;O43242-2	26S proteasome non-ATPase regulatory subunit 3	PSMD3	213
NaN	NaN	NaN	22.3184	NaN	22.4231	NaN	NaN	NaN	3	3	3	13.5	13.5	13.5	47.343	0	3.0404	60682000	4	O43251-8;O43251-6;O43251-5;O43251;O43251-10;O43251-2;O43251-3;O43251-4;Q9NWB1-3;A6NFN3-2;O43251-9;Q9NWB1-4;Q9NWB1-5;Q9NWB1;O43251-7;Q9NWB1-2;A6NFN3	O43251-8;O43251-6;O43251-5;O43251;O43251-10;O43251-2;O43251-3	RNA binding protein fox-1 homolog 2	RBFOX2	214
21.7621	21.7845	NaN	23.721	NaN	21.1149	NaN	21.4974	NaN	3	3	3	5.1	5.1	5.1	76.806	0	9.6333	119380000	6	O43264-2;O43264	O43264-2;O43264	Centromere/kinetochore protein zw10 homolog	ZW10	215
22.8636	NaN	NaN	NaN	NaN	22.4637	23.3461	NaN	NaN	5	5	5	10.8	10.8	10.8	90.254	0	11.076	99051000	12	O43290	O43290	U4/U6.U5 tri-snRNP-associated protein 1	SART1	216
NaN	NaN	NaN	21.6179	NaN	NaN	NaN	NaN	NaN	2	2	2	5.2	5.2	5.2	61.097	0.00039793	2.5689	26631000	2	O43292-2;O43292	O43292-2;O43292	Glycosylphosphatidylinositol anchor attachment 1 protein	GPAA1	217
NaN	NaN	NaN	NaN	NaN	23.3519	NaN	NaN	NaN	6	6	6	21.6	21.6	21.6	52.535	0	18.736	79144000	7	O43293;O43293-2	O43293;O43293-2	Death-associated protein kinase 3	DAPK3	218
NaN	NaN	NaN	22.8328	NaN	NaN	NaN	NaN	NaN	3	3	3	10.6	10.6	10.6	49.814	0	306.63	32461000	5	O43294;O43294-2	O43294;O43294-2	Transforming growth factor beta-1-induced transcript 1 protein	TGFB1I1	219
NaN	NaN	NaN	NaN	NaN	NaN	20.8087	NaN	NaN	3	3	3	8.5	8.5	8.5	64.229	0	11.237	35676000	3	O43318-2;O43318;O43318-4;O43318-3	O43318-2;O43318	Mitogen-activated protein kinase kinase kinase 7	MAP3K7	220
NaN	NaN	NaN	NaN	NaN	NaN	NaN	NaN	NaN	1	1	1	7.9	7.9	7.9	15.548	0.0014514	1.9386	10339000	0	O43324-2;O43324	O43324-2;O43324	Eukaryotic translation elongation factor 1 epsilon-1	EEF1E1	221
26.5502	21.0909	NaN	24.5716	20.8014	27.8032	27.4492	24.1469	25.1133	28	28	21	39.3	39.3	34.6	59.952	0	323.31	3215500000	232	O43390-4;O43390;O43390-2;O43390-3	O43390-4;O43390;O43390-2;O43390-3	Heterogeneous nuclear ribonucleoprotein R	HNRNPR	222
22.6034	NaN	NaN	NaN	NaN	22.6485	23.1787	NaN	NaN	1	1	1	2.6	2.6	2.6	77.528	0	3.249	84384000	5	O43395	O43395	U4/U6 small nuclear ribonucleoprotein Prp3	PRPF3	223
21.8485	NaN	NaN	23.6067	NaN	21.2591	21.5959	NaN	21.7966	5	5	5	40.3	40.3	40.3	22.237	0	98.459	101370000	6	O43399;O43399-5;O43399-7;O43399-6;O43399-2;O43399-4;O43399-3	O43399;O43399-5;O43399-7;O43399-6;O43399-2;O43399-4;O43399-3	Tumor protein D54	TPD52L2	224
NaN	NaN	NaN	NaN	NaN	NaN	NaN	NaN	21.2804	1	1	1	3.3	3.3	3.3	39.589	0	6.3277	26023000	4	O43488	O43488	Aflatoxin B1 aldehyde reductase member 2	AKR7A2	225
22.8659	NaN	22.6153	22.3791	22.9878	22.8205	22.6238	NaN	22.4145	5	5	5	9	9	9	95.541	0	44.596	187220000	20	O43491-4;O43491;O43491-2;O43491-3	O43491-4;O43491;O43491-2;O43491-3	Band 4.1-like protein 2	EPB41L2	226
NaN	NaN	NaN	23.8729	23.1037	23.7879	NaN	NaN	23.2315	2	2	2	59.3	59.3	59.3	9.6138	0	105.94	294230000	17	O43504	O43504	Ragulator complex protein LAMTOR5	LAMTOR5	227
NaN	NaN	NaN	22.0885	NaN	NaN	NaN	NaN	22.2172	2	2	2	11	11	11	49.85	0	8.2439	123860000	5	O43556;O43556-4;O43556-3	O43556;O43556-4;O43556-3	Epsilon-sarcoglycan	SGCE	228
NaN	NaN	NaN	NaN	NaN	NaN	NaN	23.3391	NaN	5	5	5	22.7	22.7	22.7	38.407	0	28.338	86027000	8	O43570-2;O43570	O43570-2;O43570	Carbonic anhydrase 12	CA12	229
NaN	NaN	NaN	22.1887	NaN	NaN	NaN	22.4243	NaN	1	1	1	2.1	2.1	2.1	109.96	0	13.437	66362000	4	O43592	O43592	Exportin-T	XPOT	230
NaN	NaN	NaN	NaN	NaN	NaN	NaN	NaN	19.7451	1	1	1	5.4	5.4	5.4	34.688	0.00076746	2.2765	9530500	1	O43597	O43597	Protein sprouty homolog 2	SPRY2	231
21.4279	21.9666	NaN	23.084	21.6212	21.6026	20.8865	NaN	21.0128	5	5	5	13.7	13.7	13.7	51.355	0	14.19	93006000	5	O43615	O43615	Mitochondrial import inner membrane translocase subunit TIM44	TIMM44	232
NaN	NaN	NaN	NaN	21.1782	NaN	NaN	NaN	20.837	3	3	3	25.4	25.4	25.4	15.005	0	3.4916	19258000	3	O43617-2;O43617	O43617-2;O43617	Trafficking protein particle complex subunit 3	TRAPPC3	233
NaN	22.4769	NaN	NaN	22.3191	NaN	NaN	22.1264	NaN	2	2	2	12.6	12.6	12.6	25.104	0.00075988	2.1879	85819000	4	O43633	O43633	Charged multivesicular body protein 2a	CHMP2A	234
22.0172	NaN	NaN	NaN	NaN	23.4621	22.2588	NaN	NaN	3	3	3	9.7	9.7	9.7	56.289	0	9.0067	94307000	4	O43660-2;O43660	O43660-2;O43660	Pleiotropic regulator 1	PLRG1	235
NaN	NaN	NaN	21.403	NaN	20.8212	NaN	NaN	NaN	2	2	2	19.7	19.7	19.7	15.667	0	4.1947	37616000	7	O43674-2;O43674	O43674-2;O43674	NADH dehydrogenase [ubiquinone] 1 beta subcomplex subunit 5, mitochondrial	NDUFB5	236
NaN	21.9455	NaN	NaN	NaN	22.9807	NaN	NaN	NaN	3	3	3	45.5	45.5	45.5	10.921	0	60.434	103960000	7	O43678;O43678-2	O43678	NADH dehydrogenase [ubiquinone] 1 alpha subcomplex subunit 2	NDUFA2	237
NaN	NaN	NaN	21.4013	NaN	20.9378	NaN	NaN	23.575	3	3	3	19	19	19	38.792	0	32.079	122220000	8	O43681	O43681	ATPase ASNA1	ASNA1	238
21.824	22.7594	NaN	21.8523	22.656	23.042	NaN	22.8386	23.083	4	4	4	17.5	17.5	17.5	36.954	0	6.0591	199880000	16	O43684-2;O43684	O43684-2;O43684	Mitotic checkpoint protein BUB3	BUB3	239
22.3102	22.7003	NaN	22.8979	21.6674	24.971	22.6102	22.8309	24.2229	15	7	7	23.3	12.4	12.4	104.85	0	94.914	449480000	24	O43707;O43707-2;O43707-3;P35609-2;P35609;Q08043	O43707;O43707-2;O43707-3	Alpha-actinin-4	ACTN4	240
20.413	NaN	NaN	NaN	22.6879	20.7095	NaN	NaN	NaN	2	2	2	11.4	11.4	11.4	31.88	0	4.0309	45298000	4	O43709;O43709-2;O43709-3	O43709;O43709-2;O43709-3	Probable 18S rRNA (guanine-N(7))-methyltransferase	WBSCR22	241
NaN	NaN	NaN	NaN	21.7576	22.4359	NaN	NaN	22.4803	3	3	3	64.5	64.5	64.5	8.7858	0	24.273	92942000	4	O43715	O43715	TP53-regulated inhibitor of apoptosis 1	TRIAP1	242
NaN	NaN	NaN	NaN	21.7236	NaN	NaN	NaN	20.5691	3	3	3	13.4	13.4	13.4	34.063	0	4.5785	30404000	6	O43765	O43765	Small glutamine-rich tetratricopeptide repeat-containing protein alpha	SGTA	243
22.6768	22.5262	NaN	23.5093	22.5004	23.0412	22.5637	21.9432	NaN	4	4	4	10.2	10.2	10.2	62.942	0	16.234	162010000	12	O43776;O43776-2	O43776	Asparagine--tRNA ligase, cytoplasmic	NARS	244
22.0104	NaN	NaN	NaN	NaN	NaN	22.2524	21.9505	20.8163	6	6	6	8.6	8.6	8.6	131.98	0	15.235	156780000	11	O43795;O43795-2;Q9UBC5	O43795;O43795-2	Unconventional myosin-Ib	MYO1B	245
23.5532	22.9807	NaN	24.0911	22.5025	26.1085	23.6223	22.779	24.3401	5	5	5	31.7	31.7	31.7	26.227	0	94.653	749680000	25	O43809	O43809	Cleavage and polyadenylation specificity factor subunit 5	NUDT21	246
22.5849	NaN	NaN	NaN	NaN	23.879	NaN	NaN	NaN	1	1	1	3.6	3.6	3.6	51.84	0	9.3431	131150000	9	O43818	O43818	U3 small nucleolar RNA-interacting protein 2	RRP9	247
NaN	NaN	NaN	NaN	NaN	22.0173	NaN	NaN	NaN	4	4	4	10.5	10.5	10.5	76.107	0	5.9041	33601000	7	O43823	O43823	A-kinase anchor protein 8	AKAP8	248
NaN	20.7842	NaN	NaN	20.5179	20.6013	NaN	20.8685	21.7781	3	3	3	11.2	11.2	11.2	42.183	0	41.62	53628000	7	O43837;O43837-3;O43837-2	O43837;O43837-3;O43837-2	Isocitrate dehydrogenase [NAD] subunit beta, mitochondrial	IDH3B	249
24.1721	23.7062	23.8349	24.5621	24.6537	24.1638	24.9005	24.13	26.3141	6	6	4	21.3	21.3	9.8	37.106	0	50.21	1084000000	48	O43852;O43852-3;O43852-13;O43852-14;O43852-11;O43852-10;O43852-5;O43852-6;O43852-12;O43852-9;O43852-15	O43852;O43852-3;O43852-13;O43852-14;O43852-11;O43852-10;O43852-5;O43852-6	Calumenin	CALU	250
NaN	NaN	NaN	NaN	NaN	NaN	NaN	NaN	21.1345	3	1	1	18.4	7	7	37.134	0.00078647	2.4775	34143000	2	O43852-2;O43852-4;O43852-7;O43852-8	O43852-2;O43852-4;O43852-7;O43852-8	Calumenin	CALU	251
27.1251	29.0303	28.1455	24.0088	26.4505	24.3628	25.9274	26.8094	24.1356	18	18	18	36.2	36.2	36.2	52.747	0	323.31	3345700000	202	O43854-2;O43854	O43854-2;O43854	EGF-like repeat and discoidin I-like domain-containing protein 3	EDIL3	252
21.773	21.9339	NaN	24.6506	22.0345	20.7525	21.0126	NaN	NaN	6	6	6	13.6	13.6	13.6	58.951	0	23.437	177130000	13	O43865;O43865-2;Q96HN2-4;Q96HN2-3;Q96HN2-2;Q96HN2	O43865;O43865-2;Q96HN2-4;Q96HN2-3;Q96HN2-2;Q96HN2	Putative adenosylhomocysteinase 2;Putative adenosylhomocysteinase 3	AHCYL1;AHCYL2	253
NaN	NaN	NaN	NaN	NaN	22.8032	21.362	NaN	NaN	7	7	7	46.2	46.2	46.2	12.517	0	39.88	129520000	13	O43920	O43920	NADH dehydrogenase [ubiquinone] iron-sulfur protein 5	NDUFS5	254
NaN	NaN	NaN	23.2179	NaN	24.4739	22.95	NaN	24.0875	4	4	4	80.4	80.4	80.4	10.998	0	141.4	342790000	15	O60220	O60220	Mitochondrial import inner membrane translocase subunit Tim8 A	TIMM8A	255
25.3904	23.0112	23.5664	NaN	NaN	NaN	22.6593	24.0431	23.551	7	7	7	11	11	11	116.07	0	24.207	200860000	13	O60245;O60245-2	O60245;O60245-2	Protocadherin-7	PCDH7	256
21.6348	NaN	NaN	NaN	NaN	22.2276	21.5817	NaN	NaN	7	7	3	9	9	4.7	121.9	0	9.0592	61610000	9	O60264	O60264	SWI/SNF-related matrix-associated actin-dependent regulator of chromatin subfamily A member 5	SMARCA5	257
NaN	NaN	NaN	NaN	20.8973	NaN	NaN	NaN	NaN	1	1	1	2.1	2.1	2.1	68.02	0.0041436	1.634	19656000	2	O60279	O60279	Sushi domain-containing protein 5	SUSD5	258
NaN	NaN	NaN	NaN	NaN	21.5584	NaN	NaN	NaN	3	3	3	1.1	1.1	1.1	254.39	0	22.33	25106000	4	O60287	O60287	Nucleolar pre-ribosomal-associated protein 1	URB1	259
NaN	NaN	NaN	NaN	NaN	NaN	NaN	NaN	NaN	2	2	2	2.9	2.9	2.9	194.61	0.0077572	1.4832	13857000	2	O60292	O60292	Signal-induced proliferation-associated 1-like protein 3	SIPA1L3	260
NaN	NaN	NaN	NaN	NaN	22.1887	NaN	NaN	NaN	3	3	3	2.9	2.9	2.9	171.29	0	4.5226	31320000	3	O60306	O60306	Intron-binding protein aquarius	AQR	261
NaN	NaN	NaN	24.6717	23.3054	23.9247	23.5393	24.747	24.9788	11	11	11	18.6	18.6	18.6	107.57	0	60.829	716420000	34	O60313-13;O60313;O60313-9;O60313-11;O60313-2;O60313-10	O60313-13;O60313;O60313-9;O60313-11;O60313-2;O60313-10	Dynamin-like 120 kDa protein, mitochondrial;Dynamin-like 120 kDa protein, form S1	OPA1	262
NaN	NaN	NaN	NaN	NaN	20.4072	NaN	NaN	NaN	2	2	2	3.4	3.4	3.4	92.902	0	2.9758	11092000	2	O60341;O60341-2	O60341;O60341-2	Lysine-specific histone demethylase 1A	KDM1A	263
NaN	NaN	NaN	21.3668	NaN	NaN	NaN	23.2802	21.5519	3	3	3	10.1	10.1	10.1	75.579	0	6.7401	107430000	6	O60353-2;O60353	O60353-2;O60353	Frizzled-6	FZD6	264
NaN	21.9914	NaN	21.6752	NaN	NaN	NaN	NaN	21.5629	3	3	3	6.3	6.3	6.3	51.964	0	13.757	60532000	7	O60427	O60427	Fatty acid desaturase 1	FADS1	265
21.1373	NaN	21.7991	26.259	26.0044	20.2745	23.4526	25.3981	24.6432	15	15	15	23.6	23.6	23.6	101.38	0	323.31	950890000	61	O60462-4;O60462-5;O60462-2;O60462-3;O60462;O60462-6	O60462-4;O60462-5;O60462-2;O60462-3;O60462	Neuropilin-2	NRP2	266
23.1468	24.724	24.8561	24.4841	24.6475	24.4936	22.1612	23.3758	21.6205	8	8	8	14.8	14.8	14.8	73.003	0	47.95	506450000	40	O60476	O60476	Mannosyl-oligosaccharide 1,2-alpha-mannosidase IB	MAN1A2	267
22.5008	22.9741	22.5521	23.6129	23.5499	23.5177	22.6211	24.6705	24.8413	12	8	8	25.2	19.6	19.6	74.435	0	105.58	579350000	29	O60488-2;O60488	O60488-2;O60488	Long-chain-fatty-acid--CoA ligase 4	ACSL4	268
NaN	NaN	NaN	NaN	NaN	NaN	NaN	NaN	20.7058	1	1	1	7.3	7.3	7.3	36.742	0	3.3387	10853000	1	O60504-2;O60504	O60504-2;O60504	Vinexin	SORBS3	269
23.1569	21.379	NaN	NaN	NaN	25.3669	24.251	22.8917	22.5161	20	13	13	30.4	24.6	24.6	62.656	0	129.34	476160000	44	O60506-3;O60506;O60506-4;O60506-2;O60506-5	O60506-3;O60506;O60506-4;O60506-2;O60506-5	Heterogeneous nuclear ribonucleoprotein Q	SYNCRIP	270
23.1272	NaN	NaN	NaN	NaN	23.3727	23.3951	NaN	22.8423	2	2	2	6.2	6.2	6.2	65.521	0	5.7145	179270000	3	O60508	O60508	Pre-mRNA-processing factor 17	CDC40	271
NaN	NaN	NaN	20.407	NaN	NaN	NaN	NaN	NaN	2	1	1	2.7	2.1	2.1	124.71	0	6.4021	5793300	1	O60518	O60518	Ran-binding protein 6	RANBP6	272
23.9087	24.0127	23.4978	25.185	23.0866	27.3701	22.2034	NaN	23.5886	28	28	28	51.8	51.8	51.8	84.784	0	212.66	1217700000	79	O60568	O60568	Procollagen-lysine,2-oxoglutarate 5-dioxygenase 3	PLOD3	273
NaN	NaN	NaN	NaN	NaN	NaN	NaN	NaN	15.7435	1	1	1	1.4	1.4	1.4	138.91	0.0031724	1.7838	7393100	2	O60610-2;O60610-3;O60610	O60610-2;O60610-3;O60610	Protein diaphanous homolog 1	DIAPH1	274
23.1171	23.5888	24.4606	24.6059	23.743	22.389	23.3176	24.8494	24.818	10	10	10	41.5	41.5	41.5	45.803	0	323.31	687040000	39	O60664-4;O60664-3;O60664;O60664-2	O60664-4;O60664-3;O60664	Perilipin-3	PLIN3	275
21.2588	22.0474	NaN	21.7948	22.4504	22.0119	21.6035	22.2667	22.6745	3	3	3	8	8	8	60.029	0	50.912	153160000	14	O60684;O15131;P52294	O60684	Importin subunit alpha-7	KPNA6	276
23.7023	24.1216	24.6493	24.8342	24.3981	22.0397	23.5909	25.6608	25.4305	17	17	17	35.8	35.8	35.8	55.023	0	258.71	953860000	62	O60701;O60701-3;O60701-2	O60701;O60701-3;O60701-2	UDP-glucose 6-dehydrogenase	UGDH	277
23.3512	22.8941	22.7852	23.3613	23.0951	22.4169	23.1598	23.4283	22.8276	11	11	11	17.9	17.9	17.9	108.17	0	69.869	381870000	27	O60716;O60716-2;O60716-4;O60716-6;O60716-3;O60716-5;O60716-7;O60716-8;O60716-17;O60716-9;O60716-10;O60716-12;O60716-14;O60716-11;O60716-13;O60716-15;O60716-18;O60716-16;O60716-20;O60716-22;O60716-19;O60716-21;O60716-23;O60716-24;O60716-31;O60716-25;O60716-26;O60716-28;O60716-30;O60716-27;O60716-29;O60716-32	O60716;O60716-2;O60716-4;O60716-6;O60716-3;O60716-5;O60716-7;O60716-8;O60716-17;O60716-9;O60716-10;O60716-12;O60716-14;O60716-11;O60716-13;O60716-15;O60716-18;O60716-16;O60716-20;O60716-22;O60716-19;O60716-21;O60716-23;O60716-24;O60716-31;O60716-25;O60716-26;O60716-28;O60716-30;O60716-27;O60716-29;O60716-32	Catenin delta-1	CTNND1	278
NaN	NaN	NaN	NaN	NaN	NaN	NaN	NaN	20.6053	1	1	1	3.5	3.5	3.5	46.097	0.00039809	2.572	28474000	4	O60749-2;O60749	O60749-2;O60749	Sorting nexin-2	SNX2	279
22.1194	22.139	NaN	23.0363	23.75	23.5418	22.8464	22.7365	23.2419	6	6	6	27.3	27.3	27.3	29.634	0	13.248	329180000	25	O60762	O60762	Dolichol-phosphate mannosyltransferase subunit 1	DPM1	280
NaN	21.2094	NaN	22.7787	21.3151	NaN	21.4476	21.8554	NaN	2	2	2	6.3	6.3	6.3	48.672	0	22.125	104590000	7	O60784-3;O60784-4;O60784;O60784-2	O60784-3;O60784-4;O60784;O60784-2	Target of Myb protein 1	TOM1	281
28.4951	26.0035	25.2791	25.6332	23.7901	29.6405	28.6817	26.492	27.1527	12	12	0	54	54	0	13.989	0	323.31	12525000000	263	Q99879;Q99877;Q93079;Q5QNW6;P62807;P58876;P57053;O60814;Q5QNW6-2;Q96A08	Q99879;Q99877;Q93079;Q5QNW6;P62807;P58876;P57053;O60814;Q5QNW6-2	Histone H2B type 1-M;Histone H2B type 1-N;Histone H2B type 1-H;Histone H2B type 2-F;Histone H2B type 1-C/E/F/G/I;Histone H2B type 1-D;Histone H2B type F-S;Histone H2B type 1-K	HIST1H2BM;HIST1H2BN;HIST1H2BH;HIST2H2BF;HIST1H2BC;HIST1H2BD;H2BFS;HIST1H2BK	282
NaN	NaN	NaN	NaN	NaN	NaN	NaN	NaN	NaN	1	1	1	2.1	2.1	2.1	70.755	0.0014647	1.9947	0	1	O60826	O60826	Coiled-coil domain-containing protein 22	CCDC22	283
24.0043	NaN	22.5665	23.9267	22.5473	21.8957	23.2656	22.3522	24.0308	3	3	3	39.4	39.4	39.4	18.827	0	52.608	347120000	23	O60828-4;O60828-2;O60828;O60828-7;O60828-6;O60828-5;O60828-3;O60828-10;O60828-9;O60828-8	O60828-4;O60828-2;O60828;O60828-7;O60828-6;O60828-5;O60828-3	Polyglutamine-binding protein 1	PQBP1	284
23.5422	24.3332	24.1189	25.6787	23.3735	24.532	23.5482	24.2681	23.8309	6	6	6	21.9	21.9	21.9	19.258	0	323.31	736750000	51	O60831	O60831	PRA1 family protein 2	PRAF2	285
24.306	NaN	NaN	22.4823	NaN	26.0081	25.1493	NaN	22.8235	8	8	8	22	22	22	57.673	0	52.541	727160000	43	O60832;O60832-2	O60832;O60832-2	H/ACA ribonucleoprotein complex subunit 4	DKC1	286
22.4118	NaN	NaN	23.4925	NaN	23.0233	NaN	NaN	22.2201	4	4	4	6.9	6.9	6.9	138.83	0	14.172	185150000	8	O60841	O60841	Eukaryotic translation initiation factor 5B	EIF5B	287
25.7848	NaN	25.2775	23.9984	24.4855	NaN	25.768	NaN	NaN	3	3	3	18.7	18.7	18.7	15.48	0	258.7	783340000	21	O60869-2;O60869-3;O60869	O60869-2;O60869-3;O60869	Endothelial differentiation-related factor 1	EDF1	288
NaN	NaN	NaN	22.3576	NaN	21.2288	NaN	21.5801	22.7215	2	2	2	14.8	14.8	14.8	45.745	0	30.293	108870000	10	O60884	O60884	DnaJ homolog subfamily A member 2	DNAJA2	289
NaN	NaN	NaN	21.83	NaN	NaN	NaN	NaN	NaN	2	2	2	26.3	26.3	26.3	16.832	0	12.532	25491000	6	O60888-3;O60888;O60888-2	O60888-3;O60888;O60888-2	Protein CutA	CUTA	290
NaN	NaN	NaN	NaN	NaN	NaN	NaN	NaN	NaN	3	3	3	7.7	7.7	7.7	44.763	0	47.724	55991000	4	O60909-3;O60909;O60909-2	O60909-3;O60909;O60909-2	Beta-1,4-galactosyltransferase 2;Lactose synthase A protein;N-acetyllactosamine synthase;Beta-N-acetylglucosaminylglycopeptide beta-1,4-galactosyltransferase;Beta-N-acetylglucosaminyl-glycolipid beta-1,4-galactosyltransferase	B4GALT2	291
23.5091	23.2057	NaN	23.6054	23.2768	21.8048	24.2739	23.7009	25.1142	6	6	6	59	59	59	14.21	0	106.15	498550000	32	O60925	O60925	Prefoldin subunit 1	PFDN1	292
NaN	NaN	NaN	22.6228	22.3396	22.4575	NaN	NaN	22.0501	2	2	2	4.8	4.8	4.8	78.159	0	2.6745	156640000	5	O75027-3;O75027;O75027-2	O75027-3;O75027;O75027-2	ATP-binding cassette sub-family B member 7, mitochondrial	ABCB7	293
NaN	NaN	NaN	21.1533	22.5443	NaN	NaN	NaN	NaN	5	5	5	5.7	5.7	5.7	135.19	0	6.1468	28073000	5	O75054;O75054-2	O75054;O75054-2	Immunoglobulin superfamily member 3	IGSF3	294
NaN	NaN	NaN	NaN	NaN	NaN	NaN	NaN	21.3515	1	1	1	2.2	2.2	2.2	92.129	0.00075586	2.1582	30520000	2	O75077-3;O75077-2;O75077	O75077-3;O75077-2;O75077	Disintegrin and metalloproteinase domain-containing protein 23	ADAM23	295
24.1415	24.5524	24.9645	24.1801	23.6358	22.8257	25.4203	24.4035	25.211	11	11	11	23.3	23.3	23.3	66.193	0	55.101	752690000	26	O75083;O75083-3	O75083;O75083-3	WD repeat-containing protein 1	WDR1	296
NaN	NaN	NaN	NaN	NaN	NaN	NaN	NaN	NaN	2	2	2	2.1	2.1	2.1	141.06	0.0067866	1.513	7547600	1	O75122;O75122-3	O75122;O75122-3	CLIP-associating protein 2	CLASP2	297
21.8308	NaN	NaN	NaN	NaN	NaN	22.7222	22.1769	23.1537	4	4	4	7.3	7.3	7.3	60.13	0	6.9063	112840000	11	O75131	O75131	Copine-3	CPNE3	298
NaN	NaN	NaN	NaN	NaN	NaN	NaN	22.2656	NaN	2	2	2	6.5	6.5	6.5	34.225	0	3.602	31854000	2	O75144-2;O75144;O75144-3	O75144-2;O75144;O75144-3	ICOS ligand	ICOSLG	299
NaN	NaN	NaN	NaN	NaN	NaN	NaN	NaN	22.6001	2	2	2	2.4	2.4	2.4	146.67	0.0041739	1.6806	91747000	2	O75153	O75153	Clustered mitochondria protein homolog	CLUH	300
NaN	21.2004	NaN	NaN	21.551	21.3446	21.4806	NaN	21.493	5	5	5	3.3	3.3	3.3	254.41	0	10.544	65859000	9	O75165	O75165	DnaJ homolog subfamily C member 13	DNAJC13	301
NaN	NaN	NaN	NaN	NaN	NaN	NaN	NaN	NaN	1	1	1	6.8	6.8	6.8	22.202	0	63.416	64370000	7	O75251-2;O75251	O75251-2;O75251	NADH dehydrogenase [ubiquinone] iron-sulfur protein 7, mitochondrial	NDUFS7	302
22.662	22.7467	22.2858	22.4951	22.6601	23.9275	21.9386	22.3798	22.1961	8	8	8	32.2	32.2	32.2	52.545	0	19.583	236410000	15	O75306;O75306-2	O75306;O75306-2	NADH dehydrogenase [ubiquinone] iron-sulfur protein 2, mitochondrial	NDUFS2	303
NaN	NaN	NaN	NaN	NaN	22.7594	NaN	NaN	NaN	2	2	2	11.3	11.3	11.3	29.052	0	8.7376	242760000	9	O75323-2;O75323	O75323-2;O75323	Protein NipSnap homolog 2	GBAS	304
NaN	NaN	NaN	24.1391	22.88	21.5727	NaN	27.1414	23.441	15	15	15	27.5	27.5	27.5	74.823	0	176.82	1090000000	36	O75326;O75326-2	O75326;O75326-2	Semaphorin-7A	SEMA7A	305
NaN	NaN	NaN	NaN	NaN	NaN	NaN	20.1906	NaN	1	1	1	5.8	5.8	5.8	21.664	0.0028439	1.823	30269000	3	O75340-2;O75340	O75340-2;O75340	Programmed cell death protein 6	PDCD6	306
21.7785	22.5453	24.0842	NaN	21.4393	NaN	NaN	20.5372	21.4346	3	3	3	26.9	26.9	26.9	12.855	0	3.8173	66071000	9	O75347;O75347-2	O75347;O75347-2	Tubulin-specific chaperone A	TBCA	307
NaN	NaN	NaN	NaN	NaN	21.7581	NaN	NaN	NaN	2	2	2	21.2	21.2	21.2	13.757	0	5.256	34196000	2	O75348;O95670-2;O95670	O75348;O95670-2;O95670	V-type proton ATPase subunit G 1;V-type proton ATPase subunit G 2	ATP6V1G1;ATP6V1G2	308
NaN	NaN	NaN	NaN	NaN	22.5161	NaN	NaN	NaN	5	5	5	26	26	26	39.183	0	29.134	58108000	8	O75367-2;O75367-3;O75367	O75367-2;O75367-3;O75367	Core histone macro-H2A.1	H2AFY	309
23.6652	22.4733	23.6157	24.0013	21.9074	26.5635	22.8993	23.7638	24.1231	24	22	21	14.5	13.7	13.7	271.41	0	323.31	1096800000	49	O75369-6;O75369-3;O75369-2;O75369-9;O75369;O75369-8;O75369-5;O75369-4;O75369-7	O75369-6;O75369-3;O75369-2;O75369-9;O75369;O75369-8;O75369-5;O75369-4;O75369-7	Filamin-B	FLNB	310
25.6438	25.1993	NaN	24.4998	23.7927	24.9013	25.2572	NaN	NaN	2	2	2	29	29	29	13.711	0	310.81	890300000	22	O75380	O75380	NADH dehydrogenase [ubiquinone] iron-sulfur protein 6, mitochondrial	NDUFS6	311
NaN	NaN	NaN	NaN	22.0774	NaN	NaN	NaN	NaN	2	2	2	3.7	3.7	3.7	67.725	0.0011194	2.075	35339000	1	O75382-4;O75382-2;O75382;O75382-3	O75382-4;O75382-2;O75382;O75382-3	Tripartite motif-containing protein 3	TRIM3	312
NaN	NaN	NaN	NaN	NaN	NaN	21.4707	NaN	NaN	2	2	2	6.2	6.2	6.2	51.712	0	3.1572	33196000	1	O75390	O75390	Citrate synthase, mitochondrial	CS	313
25.0918	26.1781	26.678	27.1323	25.8987	26.4453	24.9577	25.4499	25.9591	10	10	10	48.4	48.4	48.4	24.593	0	323.31	2328400000	127	O75396	O75396	Vesicle-trafficking protein SEC22b	SEC22B	314
NaN	NaN	NaN	NaN	NaN	23.2259	NaN	NaN	NaN	4	4	4	6.1	6.1	6.1	105.93	0	19.195	55468000	5	O75400-2;O75400-3;O75400	O75400-2;O75400-3;O75400	Pre-mRNA-processing factor 40 homolog A	PRPF40A	315
20.923	NaN	NaN	21.3174	NaN	NaN	NaN	NaN	NaN	2	2	2	6.2	6.2	6.2	67.072	0	4.2614	54710000	7	O75410-3;O75410-7;O75410-9;O75410;O75410-2;O75410-8;O75410-10;O75410-5;O75410-4;O75410-6	O75410-3;O75410-7;O75410-9;O75410;O75410-2;O75410-8;O75410-10;O75410-5;O75410-4;O75410-6	Transforming acidic coiled-coil-containing protein 1	TACC1	316
NaN	NaN	NaN	NaN	NaN	19.5959	NaN	18.1835	NaN	2	2	2	16.2	16.2	16.2	28.823	0	2.756	9600100	3	O75431-2;O75431	O75431-2;O75431	Metaxin-2	MTX2	317
NaN	NaN	NaN	NaN	NaN	NaN	NaN	NaN	NaN	1	1	1	6.4	6.4	6.4	38.169	0	3.2423	58340000	5	O75436	O75436	Vacuolar protein sorting-associated protein 26A	VPS26A	318
NaN	NaN	NaN	22.6328	NaN	21.257	NaN	NaN	NaN	2	2	2	32.8	32.8	32.8	6.9611	0	10.572	107140000	13	O75438;O75438-2	O75438;O75438-2	NADH dehydrogenase [ubiquinone] 1 beta subcomplex subunit 1	NDUFB1	319
20.9564	21.2329	NaN	20.9544	21.6889	21.7105	NaN	21.9301	23.3178	5	5	5	12.7	12.7	12.7	54.366	0	107.82	127960000	11	O75439	O75439	Mitochondrial-processing peptidase subunit beta	PMPCB	320
23.9573	21.6434	NaN	NaN	NaN	22.0453	NaN	NaN	NaN	4	4	4	9.1	9.1	9.1	37.267	0	4.2903	86950000	4	O75475-3;O75475-2;O75475	O75475-3;O75475-2;O75475	PC4 and SFRS1-interacting protein	PSIP1	321
23.9658	25.0315	24.4157	23.1691	23.954	22.4414	24.226	24.3542	23.5873	3	3	2	10.6	10.6	7.2	39.171	0	22.114	473800000	18	O75477	O75477	Erlin-1	ERLIN1	322
NaN	NaN	NaN	NaN	NaN	17.81	NaN	NaN	NaN	1	1	1	6.6	6.6	6.6	54.91	0	5.6959	1169900	1	O75487-2;O75487	O75487-2;O75487	Glypican-4;Secreted glypican-4	GPC4	323
23.1121	23.0175	NaN	22.9767	NaN	23.3986	NaN	22.9481	NaN	7	7	7	37.5	37.5	37.5	30.241	0	59.634	239640000	12	O75489;O75489-2	O75489	NADH dehydrogenase [ubiquinone] iron-sulfur protein 3, mitochondrial	NDUFS3	324
NaN	NaN	NaN	NaN	NaN	26.7158	NaN	NaN	24.6495	1	1	1	8.5	8.5	8.5	36.238	0.0014519	1.9402	1620700000	4	O75493	O75493	Carbonic anhydrase-related protein 11	CA11	325
23.5289	22.1001	NaN	NaN	NaN	25.5628	23.1131	21.9778	22.3892	8	8	8	52.7	52.7	52.7	22.135	0	65.341	481290000	32	O75494-6;O75494-3;O75494-5;O75494-4;O75494-2;O75494;Q8WXF0	O75494-6;O75494-3;O75494-5;O75494-4;O75494-2;O75494	Serine/arginine-rich splicing factor 10	SRSF10	326
21.6431	24.2265	22.3385	25.1887	24.0812	22.6752	22.375	24.5611	25.1298	14	14	14	50.7	50.7	50.7	39.609	0	74.936	648420000	41	O75521-2;O75521	O75521-2;O75521	Enoyl-CoA delta isomerase 2, mitochondrial	ECI2	327
NaN	25.9073	NaN	20.5107	NaN	23.9631	NaN	25.5851	24.978	5	5	5	64	64	64	10.058	0	87.972	1703400000	35	O75531	O75531	Barrier-to-autointegration factor;Barrier-to-autointegration factor, N-terminally processed	BANF1	328
26.7796	21.4919	22.2933	24.7057	21.9064	27.6968	27.2463	24.487	24.7932	29	29	29	29.2	29.2	29.2	145.83	0	255.03	2502100000	111	O75533;O75533-2	O75533	Splicing factor 3B subunit 1	SF3B1	329
NaN	NaN	NaN	21.821	NaN	NaN	NaN	NaN	20.7068	1	1	1	1.7	1.7	1.7	85.746	0.0014706	2.0062	36282000	2	O75534-2;O75534;O75534-3;O75534-4	O75534-2;O75534;O75534-3;O75534-4	Cold shock domain-containing protein E1	CSDE1	330
NaN	NaN	NaN	NaN	NaN	NaN	21.9073	23.1299	21.7268	5	5	5	6.9	6.9	6.9	127.6	0	31.593	90373000	7	O75578;O75578-3;O75578-2	O75578	Integrin alpha-10	ITGA10	331
NaN	NaN	NaN	NaN	NaN	NaN	NaN	NaN	NaN	1	1	1	9	9	9	19.343	0	133.03	57725000	17	O75607	O75607	Nucleoplasmin-3	NPM3	332
25.3231	NaN	NaN	23.202	NaN	26.2502	25.1728	21.5987	22.9606	27	27	27	17.1	17.1	17.1	244.5	0	323.31	824830000	82	O75643;O75643-2	O75643	U5 small nuclear ribonucleoprotein 200 kDa helicase	SNRNP200	333
NaN	NaN	NaN	21.2513	NaN	NaN	NaN	NaN	NaN	2	2	2	25.3	25.3	25.3	20.214	0	4.4524	22258000	2	O75663-2;O75663	O75663-2;O75663	TIP41-like protein	TIPRL	334
23.366	NaN	NaN	21.9686	NaN	NaN	NaN	NaN	NaN	3	3	3	19.4	19.4	19.4	41.45	0	6.6701	135370000	10	O75683	O75683	Surfeit locus protein 6	SURF6	335
23.3785	NaN	NaN	NaN	NaN	22.8537	23.253	NaN	NaN	8	8	8	3.2	3.2	3.2	318.38	0	20.122	122790000	20	O75691	O75691	Small subunit processome component 20 homolog	UTP20	336
22.3557	NaN	21.9595	22.9364	21.7038	23.4727	22.7008	21.9018	22.6267	8	8	8	10.9	10.9	10.9	155.2	0	80.935	225680000	25	O75694;O75694-2	O75694;O75694-2	Nuclear pore complex protein Nup155	NUP155	337
NaN	NaN	NaN	NaN	NaN	21.9936	NaN	NaN	NaN	2	2	2	6.7	6.7	6.7	46.561	0.001119	2.0727	40756000	2	O75718	O75718	Cartilage-associated protein	CRTAP	338
NaN	NaN	NaN	NaN	21.4976	NaN	20.7143	20.8795	22.159	7	4	4	13.3	8.8	8.8	62.72	0	5.1912	61030000	9	O75746-2;O75746	O75746-2;O75746	Calcium-binding mitochondrial carrier protein Aralar1	SLC25A12	339
21.9608	NaN	NaN	NaN	NaN	NaN	NaN	NaN	NaN	2	2	2	11.4	11.4	11.4	15.651	0.0025234	1.8971	36785000	4	O75817	O75817	Ribonuclease P protein subunit p20	POP7	340
NaN	NaN	NaN	NaN	NaN	NaN	NaN	NaN	21.5894	4	2	2	17.3	6.9	6.9	30.85	0	10.133	35984000	4	O75828	O75828	Carbonyl reductase [NADPH] 3	CBR3	341
NaN	NaN	NaN	NaN	NaN	NaN	NaN	NaN	21.4708	1	1	1	19.2	19.2	19.2	16.137	0.00076161	2.1962	19341000	0	O75832-2;O75832	O75832-2;O75832	26S proteasome non-ATPase regulatory subunit 10	PSMD10	342
NaN	22.9522	23.3689	24.5157	22.7534	22.2322	22.8307	22.8719	23.9304	6	6	6	10.9	10.9	10.9	54.812	0	26.331	373590000	22	O75844	O75844	CAAX prenyl protease 1 homolog	ZMPSTE24	343
NaN	NaN	NaN	NaN	NaN	NaN	NaN	22.2399	23.6495	7	7	6	20	20	17.9	46.659	0	8.7186	133030000	6	O75874	O75874	Isocitrate dehydrogenase [NADP] cytoplasmic	IDH1	344
NaN	NaN	NaN	22.3899	21.9794	23.745	NaN	NaN	24.6476	3	3	3	17.3	17.3	17.3	33.814	0	21.082	282310000	8	O75880	O75880	Protein SCO1 homolog, mitochondrial	SCO1	345
22.0373	24.5769	24.0356	24.6956	NaN	23.5918	22.4802	23.9114	24.4365	7	7	7	26.6	26.6	26.6	21.614	0	323.31	548450000	84	O75915	O75915	PRA1 family protein 3	ARL6IP5	346
21.4395	NaN	NaN	21.2707	20.963	23.8557	21.3966	NaN	20.5568	5	5	5	40.9	40.9	40.9	26.131	0	58.342	152660000	10	O75934	O75934	Pre-mRNA-splicing factor SPF27	BCAS2	347
NaN	NaN	NaN	NaN	NaN	NaN	NaN	NaN	22.6326	2	2	2	20.2	20.2	20.2	29.841	0	61.787	49916000	2	O75937	O75937	DnaJ homolog subfamily C member 8	DNAJC8	348
26.4302	26.6433	26.2509	27.8863	26.8224	26.8271	26.6494	26.5988	26.5376	14	14	14	86.1	86.1	86.1	15.773	0	323.31	4508600000	184	O75947-2;O75947	O75947-2;O75947	ATP synthase subunit d, mitochondrial	ATP5H	349
NaN	22.2092	21.0733	NaN	NaN	21.564	NaN	NaN	21.4639	5	5	5	22.4	22.4	22.4	42.08	0	16.605	57250000	7	O75955-2;O75955	O75955-2;O75955	Flotillin-1	FLOT1	350
NaN	NaN	NaN	NaN	NaN	NaN	NaN	19.8861	19.7448	4	4	4	2.7	2.7	2.7	287.37	0	4.0007	46188000	4	O75962-5;O75962-4;O75962;O75962-2;O60229-2;O60229	O75962-5;O75962-4;O75962;O75962-2	Triple functional domain protein	TRIO	351
NaN	NaN	22.8126	22.6731	NaN	22.2593	NaN	NaN	NaN	4	4	4	40.8	40.8	40.8	11.428	0	6.8583	111170000	11	O75964	O75964	ATP synthase subunit g, mitochondrial	ATP5L	352
22.6286	NaN	NaN	22.9128	NaN	NaN	22.1677	22.7279	22.8356	8	8	8	9.6	9.6	9.6	152.93	0	35.786	154720000	13	O75976;O75976-2	O75976;O75976-2	Carboxypeptidase D	CPD	353
NaN	NaN	NaN	NaN	NaN	NaN	NaN	22.6342	23.3526	2	2	2	14.3	14.3	14.3	37.432	0	199.08	110560000	3	O76003	O76003	Glutaredoxin-3	GLRX3	354
26.1587	NaN	NaN	23.8956	NaN	27.436	26.7152	22.5025	24.6505	22	22	22	38.6	38.6	38.6	54.972	0	289.64	2039200000	115	O76021;O76021-2	O76021	Ribosomal L1 domain-containing protein 1	RSL1D1	355
NaN	NaN	NaN	NaN	NaN	NaN	NaN	NaN	22.2079	2	2	2	10	10	10	37.84	0	2.8941	54960000	2	O76071	O76071	Probable cytosolic iron-sulfur protein assembly protein CIAO1	CIAO1	356
NaN	NaN	NaN	NaN	NaN	NaN	NaN	22.2101	NaN	5	5	5	38.7	38.7	38.7	34.624	0	12.504	76717000	5	O94766-2;O94766	O94766-2;O94766	Galactosylgalactosylxylosylprotein 3-beta-glucuronosyltransferase 3	B3GAT3	357
NaN	NaN	NaN	20.0208	NaN	NaN	NaN	NaN	NaN	1	1	1	5.1	5.1	5.1	42.344	0.0034977	1.7251	4432900	1	O94768	O94768	Serine/threonine-protein kinase 17B	STK17B	358
24.0136	NaN	NaN	21.4597	20.9115	23.3558	23.1433	NaN	NaN	7	7	7	20.7	20.7	20.7	75.022	0	49.212	145080000	18	O94776;O94776-2	O94776;O94776-2	Metastasis-associated protein MTA2	MTA2	359
23.0856	23.8552	23.7909	26.3804	26.1761	26.2826	23.2521	25.6953	26.2829	15	15	15	34.2	34.2	34.2	67.454	0	130.49	1841700000	55	O94826	O94826	Mitochondrial import receptor subunit TOM70	TOMM70A	360
NaN	NaN	NaN	NaN	19.8143	NaN	NaN	NaN	NaN	1	1	1	1.8	1.8	1.8	108.19	0.0041508	1.6433	18124000	1	O94829	O94829	Importin-13	IPO13	361
NaN	NaN	NaN	NaN	NaN	NaN	NaN	NaN	NaN	2	2	2	3.3	3.3	3.3	116.2	0.00076365	2.2264	7792200	1	O94832	O94832	Unconventional myosin-Id	MYO1D	362
21.5917	21.8597	NaN	23.3339	22.581	NaN	21.4388	21.3582	21.6801	5	5	5	5.4	5.4	5.4	89.889	0	8.6018	133580000	13	O94851-2;O94851-5;O94851-6;O94851-4;O94851-3;O94851	O94851-2;O94851-5;O94851-6;O94851-4;O94851-3;O94851	Protein-methionine sulfoxide oxidase MICAL2	MICAL2	363
21.9997	NaN	NaN	24.7543	24.7966	22.2771	21.6003	24.9505	23.626	14	14	14	17.1	17.1	17.1	119.47	0	120.34	527610000	25	O94856-4;O94856-12;O94856-9;O94856-11;O94856-6;O94856-7;O94856-13;O94856;O94856-10;O94856-3;O94856-8;O94856-5;O94856-2	O94856-4;O94856-12;O94856-9;O94856-11;O94856-6;O94856-7;O94856-13;O94856;O94856-10;O94856-3;O94856-8;O94856-5	Neurofascin	NFASC	364
NaN	NaN	NaN	23.1125	22.9513	22.0499	22.1526	23.2029	NaN	4	4	4	5.2	5.2	5.2	89.594	0	42.771	176870000	11	O94874;O94874-3;O94874-2	O94874;O94874-3;O94874-2	E3 UFM1-protein ligase 1	UFL1	365
NaN	NaN	NaN	NaN	NaN	NaN	NaN	NaN	20.7772	2	1	1	10.9	7.4	7.4	37.839	0	4.5824	52854000	4	O94905	O94905	Erlin-2	ERLIN2	366
22.8462	NaN	NaN	NaN	NaN	24.6175	23.562	22.3633	NaN	10	10	10	20.2	20.2	20.2	102.43	0	18.113	221280000	18	O94906-2;O94906	O94906-2;O94906	Pre-mRNA-processing factor 6	PRPF6	367
NaN	21.8213	NaN	NaN	NaN	NaN	NaN	21.1438	NaN	4	4	4	2.3	2.3	2.3	339.59	0	5.3709	30119000	5	O94915	O94915	Protein furry homolog-like	FRYL	368
NaN	23.1892	23.0301	22.2029	22.335	23.7261	NaN	21.965	21.2788	8	8	8	24.2	24.2	24.2	55.016	0	67.994	225350000	27	O94919	O94919	Endonuclease domain-containing 1 protein	ENDOD1	369
NaN	21.603	NaN	23.8374	21.9668	22.0206	NaN	NaN	NaN	5	5	5	13.7	13.7	13.7	65.459	0	10.156	125720000	9	O94925-3;O94925	O94925-3;O94925	Glutaminase kidney isoform, mitochondrial	GLS	370
NaN	NaN	NaN	23.7935	NaN	22.4763	NaN	23.1186	22.5541	4	4	4	8.8	8.8	8.8	117.67	0	11.234	206870000	7	O94979-6;O94979-3;O94979-10;O94979-4;O94979-9;O94979-2;O94979;O94979-8;O94979-5;O94979-7	O94979-6;O94979-3;O94979-10;O94979-4;O94979-9;O94979-2;O94979;O94979-8;O94979-5;O94979-7	Protein transport protein Sec31A	SEC31A	371
22.2349	NaN	NaN	NaN	NaN	22.7321	NaN	NaN	NaN	2	2	2	8.8	8.8	8.8	39.641	0	2.7447	46107000	3	O95084-2;O95084	O95084-2;O95084	Serine protease 23	PRSS23	372
23.0682	23.4578	NaN	24.6933	NaN	22.4126	23.1535	22.8157	23.1337	3	3	3	28.9	28.9	28.9	15.489	0	9.1922	284890000	8	O95139;O95139-2	O95139	NADH dehydrogenase [ubiquinone] 1 beta subcomplex subunit 6	NDUFB6	373
NaN	NaN	NaN	NaN	NaN	NaN	NaN	NaN	NaN	2	2	2	13.1	13.1	13.1	22.255	0	4.2017	40100000	5	O95147	O95147	Dual specificity protein phosphatase 14	DUSP14	374
NaN	NaN	NaN	19.6069	NaN	NaN	NaN	NaN	NaN	2	2	2	5.5	5.5	5.5	34.114	0	3.4136	16439000	2	O95159	O95159	Zinc finger protein-like 1	ZFPL1	375
24.2382	24.4574	23.5232	23.8763	24.1624	22.7801	23.4643	22.8517	22.7419	5	5	5	45	45	45	14.026	0	103.87	356600000	24	O95168-2;O95168	O95168-2;O95168	NADH dehydrogenase [ubiquinone] 1 beta subcomplex subunit 4	NDUFB4	376
21.5569	22.4364	22.6523	22.6149	22.094	22.3444	22.1286	22.0794	21.4336	5	5	5	44.5	44.5	44.5	18.479	0	13.109	136340000	10	O95169-3;O95169;O95169-2	O95169-3;O95169;O95169-2	NADH dehydrogenase [ubiquinone] 1 beta subcomplex subunit 8, mitochondrial	NDUFB8	377
NaN	NaN	NaN	NaN	NaN	NaN	19.9193	NaN	NaN	1	1	1	8.6	8.6	8.6	12.058	0.0011215	2.0835	23429000	2	O95178	O95178	NADH dehydrogenase [ubiquinone] 1 beta subcomplex subunit 2, mitochondrial	NDUFB2	378
NaN	NaN	NaN	NaN	NaN	NaN	NaN	NaN	22.6978	2	2	2	28.4	28.4	28.4	12.805	0	183.72	122920000	6	O95183	O95183	Vesicle-associated membrane protein 5	VAMP5	379
NaN	23.1202	23.5518	25.2201	22.9757	22.2889	23.5992	25.1963	23.2616	2	2	2	22.9	22.9	22.9	25.609	0	200.33	601790000	20	O95197-3;O95197-4;O95197-7;O95197-2;O95197;O95197-6;O95197-5	O95197-3;O95197-4;O95197-7;O95197-2;O95197;O95197-6;O95197-5	Reticulon-3	RTN3	380
23.8561	24.2544	24.3602	23.6623	24.0181	23.7218	23.8192	23.7103	23.4423	10	10	10	15.7	15.7	15.7	83.353	0	18.242	536410000	26	O95202;O95202-2;O95202-3	O95202	LETM1 and EF-hand domain-containing protein 1, mitochondrial	LETM1	381
NaN	NaN	NaN	22.7477	NaN	NaN	NaN	23.5948	22.2751	4	4	4	25.4	25.4	25.4	39.007	0	19.476	170920000	8	O95210	O95210	Starch-binding domain-containing protein 1	STBD1	382
NaN	NaN	NaN	NaN	NaN	19.0352	NaN	NaN	NaN	2	2	2	20.3	20.3	20.3	9.1942	0	151.65	2735200	2	O95232-2;O95232	O95232-2;O95232	Luc7-like protein 3	LUC7L3	383
22.7292	23.2215	24.0189	24.1831	24.57	22.7595	22.6738	23.8836	23.2816	5	5	5	29.2	29.2	29.2	28.612	0	201.07	391150000	25	O95249;O95249-2	O95249;O95249-2	Golgi SNAP receptor complex member 1	GOSR1	384
22.3562	23.8622	NaN	23.7771	23.3681	23.4385	23.0983	25.6928	24.7128	9	8	8	31.7	31.7	31.7	27.228	0	35.909	687680000	14	O95292;O95292-2	O95292;O95292-2	Vesicle-associated membrane protein-associated protein B/C	VAPB	385
22.7352	24.5837	23.5865	26.1389	24.9961	21.6909	23.01	28.2317	26.0516	7	7	5	30.5	30.5	21.9	29.082	0	323.31	2814500000	71	O95297;O95297-2;O95297-4	O95297;O95297-2;O95297-4	Myelin protein zero-like protein 1	MPZL1	386
NaN	NaN	NaN	NaN	NaN	NaN	NaN	22.6008	NaN	3	1	1	16.3	5.3	5.3	22.761	0	14.984	40184000	1	O95297-3	O95297-3	Myelin protein zero-like protein 1	MPZL1	387
22.934	22.8579	23.385	23.6919	23.3621	22.8575	22.9878	23.388	23.1231	6	6	6	25.9	25.9	25.9	40.75	0	23.848	337610000	25	O95299;O95299-2	O95299;O95299-2	NADH dehydrogenase [ubiquinone] 1 alpha subcomplex subunit 10, mitochondrial	NDUFA10	388
NaN	NaN	NaN	NaN	NaN	NaN	NaN	NaN	21.3635	1	1	1	1.6	1.6	1.6	63.083	0	4.2058	38957000	4	O95302;O95302-3	O95302;O95302-3	Peptidyl-prolyl cis-trans isomerase FKBP9	FKBP9	389
NaN	NaN	NaN	NaN	NaN	NaN	22.1842	22.4489	23.593	6	6	6	38.8	38.8	38.8	27.547	0	36.787	142580000	10	O95336	O95336	6-phosphogluconolactonase	PGLS	390
NaN	NaN	NaN	NaN	NaN	NaN	NaN	NaN	NaN	2	2	2	5.2	5.2	5.2	124.92	0	2.6991	216070000	3	O95347-2;O95347	O95347-2;O95347	Structural maintenance of chromosomes protein 2	SMC2	391
NaN	NaN	NaN	21.353	NaN	NaN	NaN	NaN	NaN	2	2	2	5.3	5.3	5.3	63.954	0	2.8232	11162000	1	O95361;Q309B1;O95361-2	O95361;Q309B1;O95361-2	Tripartite motif-containing protein 16;Tripartite motif-containing protein 16-like protein	TRIM16;TRIM16L	392
22.9268	24.2418	NaN	25.2246	24.5956	NaN	24.0485	24.3138	24.2005	10	10	10	10.5	10.5	10.5	119.52	0	39.5	556430000	29	O95373	O95373	Importin-7	IPO7	393
NaN	NaN	NaN	NaN	NaN	NaN	NaN	NaN	21.3313	1	1	1	2.4	2.4	2.4	59.851	0	2.7452	31820000	2	O95394;O95394-3;O95394-4	O95394;O95394-3;O95394-4	Phosphoacetylglucosamine mutase	PGM3	394
23.4614	19.9005	NaN	NaN	NaN	NaN	21.8315	25.7901	20.9441	23	23	23	21.6	21.6	21.6	244.52	0	269.84	723590000	48	O95425-4;O95425-3;O95425;O95425-2	O95425-4;O95425-3;O95425;O95425-2	Supervillin	SVIL	395
NaN	NaN	NaN	NaN	NaN	NaN	NaN	23.944	24.3604	3	3	3	11.8	11.8	11.8	38.274	0	48.661	296320000	5	O95433;O95433-2	O95433;O95433-2	Activator of 90 kDa heat shock protein ATPase homolog 1	AHSA1	396
NaN	NaN	NaN	NaN	NaN	NaN	23.2165	NaN	NaN	2	2	2	6.6	6.6	6.6	66.574	0.0011219	2.0856	214190000	3	O95453-2;O95453-3;O95453;O95453-4	O95453-2;O95453-3;O95453;O95453-4	Poly(A)-specific ribonuclease PARN	PARN	397
NaN	NaN	NaN	21.9326	NaN	NaN	22.2026	24.4786	22.839	8	8	8	5.4	5.4	5.4	254.3	0	26.365	250770000	13	O95477	O95477	ATP-binding cassette sub-family A member 1	ABCA1	398
23.2987	NaN	NaN	21.3083	NaN	23.1128	23.7641	NaN	NaN	7	7	7	26.5	26.5	26.5	30.065	0	10.383	176660000	25	O95478	O95478	Ribosome biogenesis protein NSA2 homolog	NSA2	399
NaN	NaN	NaN	23.327	NaN	23.3906	23.6921	NaN	NaN	7	7	7	11.2	11.2	11.2	119.75	0	11.443	191710000	15	O95486;O95486-2	O95486;O95486-2	Protein transport protein Sec24A	SEC24A	400
NaN	NaN	NaN	NaN	NaN	NaN	21.6518	19.5611	NaN	2	2	2	3.2	3.2	3.2	133.63	0.001462	1.9788	13061000	3	O95487-2;O95487;O95487-3	O95487-2;O95487;O95487-3	Protein transport protein Sec24B	SEC24B	401
NaN	NaN	NaN	NaN	NaN	NaN	NaN	NaN	20.0748	2	2	2	2.3	2.3	2.3	126.16	0.0028541	1.835	13729000	1	O95490-3;O95490-4;O95490-2;O95490-5;O95490;O95490-7;O95490-6	O95490-3;O95490-4;O95490-2;O95490-5;O95490;O95490-7;O95490-6	Latrophilin-2	LPHN2	402
NaN	NaN	NaN	NaN	NaN	NaN	NaN	NaN	21.4498	2	2	2	10.2	10.2	10.2	27.873	0.0014551	1.9531	28400000	0	O95571	O95571	Persulfide dioxygenase ETHE1, mitochondrial	ETHE1	403
23.6396	24.3223	24.2086	25.1172	24.5364	24.8809	25.3075	25.6242	26.0558	15	15	11	31.5	31.5	26.2	80.419	0	106.64	1441800000	54	O95573	O95573	Long-chain-fatty-acid--CoA ligase 3	ACSL3	404
NaN	NaN	NaN	NaN	NaN	NaN	NaN	NaN	NaN	2	2	2	2.3	2.3	2.3	194.81	0	4.8997	37107000	3	O95602	O95602	DNA-directed RNA polymerase I subunit RPA1	POLR1A	405
NaN	NaN	NaN	NaN	NaN	NaN	NaN	21.9665	NaN	2	2	2	7.5	7.5	7.5	62.442	0	68.724	39565000	5	O95671-3;O95671-2;O95671	O95671-3;O95671-2;O95671	N-acetylserotonin O-methyltransferase-like protein	ASMTL	406
NaN	NaN	NaN	NaN	NaN	19.5344	NaN	NaN	NaN	2	2	2	18.2	18.2	18.2	25.424	0.0011198	2.076	5951900	1	O95707	O95707	Ribonuclease P protein subunit p29	POP4	407
21.1207	20.9597	NaN	21.3696	NaN	20.7589	21.2859	NaN	21.1505	3	3	3	20.9	20.9	20.9	28.97	0	7.0751	58281000	5	O95721	O95721	Synaptosomal-associated protein 29	SNAP29	408
22.503	NaN	NaN	NaN	NaN	23.199	22.5196	NaN	NaN	5	3	3	15.2	11.3	11.3	56.501	0	13.868	122370000	6	O95758-1;O95758-6;O95758;O95758-5;O95758-4;O95758-7;O95758-2	O95758-1;O95758-6;O95758;O95758-5;O95758-4;O95758-7;O95758-2	Polypyrimidine tract-binding protein 3	PTBP3	409
NaN	NaN	NaN	NaN	NaN	23.0408	NaN	NaN	NaN	10	10	10	16.4	16.4	16.4	105.36	0	16.93	100390000	12	O95782-2;O95782;O94973-3;O94973;O94973-2	O95782-2;O95782	AP-2 complex subunit alpha-1	AP2A1	410
NaN	NaN	NaN	NaN	NaN	23.1225	23.2129	NaN	NaN	1	1	1	4.4	4.4	4.4	54.933	0.0014567	1.9611	133220000	5	O95793-2;O95793-3;O95793	O95793-2;O95793-3;O95793	Double-stranded RNA-binding protein Staufen homolog 1	STAU1	411
NaN	NaN	NaN	21.7907	NaN	NaN	NaN	NaN	NaN	5	5	5	17.6	17.6	17.6	44.678	0	18.184	31687000	4	O95801	O95801	Tetratricopeptide repeat protein 4	TTC4	412
NaN	NaN	NaN	21.7483	NaN	NaN	NaN	21.2014	NaN	1	1	1	5.1	5.1	5.1	17.4	0.00078339	2.4589	38964000	3	O95807	O95807	Transmembrane protein 50A	TMEM50A	413
NaN	NaN	NaN	NaN	NaN	22.4603	NaN	NaN	NaN	5	5	5	33.2	33.2	33.2	23.772	0	46.397	108280000	12	O95816;O95816-2	O95816;O95816-2	BAG family molecular chaperone regulator 2	BAG2	414
NaN	NaN	NaN	NaN	NaN	21.5905	NaN	22.5067	22.6486	3	3	3	15.5	15.5	15.5	61.594	0	4.421	109980000	4	O95817	O95817	BAG family molecular chaperone regulator 3	BAG3	415
21.703	21.6887	NaN	21.2206	NaN	22.0481	22.4417	NaN	21.6968	5	5	4	4.6	4.6	4	133.4	0	17.611	109770000	11	O95819-4;O95819-2;O95819;O95819-5;O95819-6;O95819-3;Q8N4C8-5;Q8N4C8-2;Q8N4C8-3;Q8N4C8-4;Q8N4C8	O95819-4;O95819-2;O95819;O95819-5;O95819-6;O95819-3	Mitogen-activated protein kinase kinase kinase kinase 4	MAP4K4	416
NaN	21.3376	NaN	21.7466	22.2192	23.7114	20.9774	20.733	25.6873	11	11	11	23.5	23.5	23.5	66.294	0	55.65	450810000	25	O95831-3;O95831;O95831-6;O95831-4;O95831-2;O95831-5	O95831-3;O95831;O95831-6;O95831-4	Apoptosis-inducing factor 1, mitochondrial	AIFM1	417
NaN	NaN	NaN	NaN	NaN	NaN	NaN	NaN	NaN	1	1	1	2.9	2.9	2.9	56.719	0.0097055	1.4248	3385800	1	O95841;Q9UKU9	O95841;Q9UKU9	Angiopoietin-related protein 1;Angiopoietin-related protein 2	ANGPTL1;ANGPTL2	418
23.2859	24.9728	24.4096	23.7274	24.2835	21.721	NaN	NaN	21.3986	5	5	5	15.3	15.3	15.3	45.524	0	11.308	211030000	12	O95864-3;O95864;O95864-4;O95864-2	O95864-3;O95864;O95864-4;O95864-2	Fatty acid desaturase 2	FADS2	419
20.9761	21.5216	21.3683	23.0214	21.6983	20.872	21.1993	21.2882	NaN	6	6	6	12.5	12.5	12.5	63.243	0	7.5722	84131000	6	O95870;O95870-2	O95870;O95870-2	Abhydrolase domain-containing protein 16A	ABHD16A	420
NaN	NaN	NaN	NaN	NaN	NaN	NaN	NaN	20.2561	1	1	1	7.1	7.1	7.1	31.71	0.00077912	2.4138	7946200	1	O95873	O95873	Uncharacterized protein C6orf47	C6orf47	421
21.9093	22.5026	22.632	23.3672	22.5979	23.325	21.7851	22.3129	23.1688	7	7	7	43	43	43	20.776	0	21.801	249470000	21	O96000;O96000-2	O96000;O96000-2	NADH dehydrogenase [ubiquinone] 1 beta subcomplex subunit 10	NDUFB10	422
NaN	22.1119	NaN	22.4959	22.527	NaN	NaN	22.8402	21.9498	3	3	3	4.1	4.1	4.1	65.596	0	4.1108	130190000	10	O96005-3;O96005-4;O96005	O96005-3;O96005-4;O96005	Cleft lip and palate transmembrane protein 1	CLPTM1	423
NaN	NaN	22.4563	23.1751	22.8004	NaN	22.2779	22.8496	22.0692	4	4	4	17.9	17.9	17.9	34.441	0	39.924	157070000	12	O96008-2;O96008	O96008-2;O96008	Mitochondrial import receptor subunit TOM40 homolog	TOMM40	424
21.5949	NaN	NaN	NaN	22.0244	NaN	22.7203	23.1429	21.4908	4	4	4	12.7	12.7	12.7	47.924	0	17.202	141850000	12	O96013-2;O96013-3;O96013-4;O96013	O96013-2;O96013-3;O96013-4;O96013	Serine/threonine-protein kinase PAK 4	PAK4	425
22.534	NaN	NaN	NaN	NaN	22.3764	22.2842	NaN	NaN	3	3	3	11.6	11.6	11.6	43.236	0	22.806	65170000	10	O96019-2;O96019	O96019-2;O96019	Actin-like protein 6A	ACTL6A	426
23.8513	24.3877	23.9932	25.2309	24.5246	23.825	25.9057	25.4122	26.0615	11	11	10	41.3	41.3	37	36.688	0	266.5	1181900000	39	P00338;P00338-3;P00338-4;P00338-5;P00338-2;Q6ZMR3;P07864	P00338;P00338-3;P00338-4;P00338-5;P00338-2	L-lactate dehydrogenase A chain	LDHA	427
23.3909	22.9672	NaN	23.112	NaN	22.5209	23.1327	NaN	22.5282	5	5	5	17.9	17.9	17.9	61.397	0	13.407	164260000	12	P00367;P00367-3;P00367-2;P49448	P00367;P00367-3;P00367-2	Glutamate dehydrogenase 1, mitochondrial	GLUD1	428
NaN	22.3974	NaN	NaN	22.739	21.9528	NaN	22.2225	22.4719	3	3	3	21.2	21.2	21.2	31.628	0	5.9246	120040000	10	P00387-2;P00387;P00387-3	P00387-2;P00387;P00387-3	NADH-cytochrome b5 reductase 3;NADH-cytochrome b5 reductase 3 membrane-bound form;NADH-cytochrome b5 reductase 3 soluble form	CYB5R3	429
24.2455	23.7617	NaN	22.9825	22.9724	22.8704	24.3138	24.4401	25.3656	9	9	9	28.6	28.6	28.6	51.7	0	129.37	560310000	14	P00390-2;P00390-3;P00390;P00390-5;P00390-4	P00390-2;P00390-3;P00390;P00390-5;P00390-4	Glutathione reductase, mitochondrial	GSR	430
23.4746	24.9345	24.4221	25.4529	24.8324	24.2965	24.4208	25.1689	24.5091	4	4	4	19.4	19.4	19.4	25.565	0	124.47	903030000	45	P00403	P00403	Cytochrome c oxidase subunit 2	MT-CO2	431
NaN	22.4855	NaN	NaN	22.1515	NaN	24.0897	NaN	23.1888	2	2	2	27.9	27.9	27.9	15.936	0	22.676	156260000	7	P00441	P00441	Superoxide dismutase [Cu-Zn]	SOD1	432
NaN	NaN	NaN	NaN	NaN	NaN	NaN	NaN	19.917	1	1	1	6.2	6.2	6.2	32.118	0.0093897	1.4486	9916800	1	P00491	P00491	Purine nucleoside phosphorylase	PNP	433
NaN	NaN	NaN	NaN	NaN	NaN	NaN	NaN	22.3887	2	2	2	11	11	11	24.579	0	4.8821	72753000	2	P00492	P00492	Hypoxanthine-guanine phosphoribosyltransferase	HPRT1	434
NaN	22.7294	NaN	NaN	NaN	NaN	NaN	NaN	NaN	2	2	2	6.7	6.7	6.7	43.029	0	3.0703	9144000	1	P00505-2;P00505	P00505-2;P00505	Aspartate aminotransferase, mitochondrial	GOT2	435
25.5238	25.4732	24.7194	27.668	27.073	23.2706	25.0735	27.6303	26.2159	29	29	28	35.1	35.1	34.1	134.28	0	323.31	3425000000	199	P00533;P00533-4;P00533-3;P00533-2	P00533	Epidermal growth factor receptor	EGFR	436
26.2362	26.9231	26.0839	26.3679	26.4012	25.064	27.7436	25.4056	26.8728	17	17	17	61.6	61.6	61.6	44.614	0	172.43	2348300000	118	P00558;P00558-2;P07205	P00558;P00558-2	Phosphoglycerate kinase 1	PGK1	437
NaN	NaN	NaN	NaN	NaN	NaN	NaN	NaN	NaN	1	1	1	2.8	2.8	2.8	47.617	0.0061707	1.5856	81461000	3	P00740-2;P00740	P00740-2;P00740	Coagulation factor IX;Coagulation factor IXa light chain;Coagulation factor IXa heavy chain	F9	438
NaN	NaN	NaN	23.1384	24.8424	21.1847	22.1333	27.3637	23.4092	14	14	14	38.9	38.9	38.9	46.908	0	103.52	1225500000	40	P00749-2;P00749	P00749-2;P00749	Urokinase-type plasminogen activator;Urokinase-type plasminogen activator long chain A;Urokinase-type plasminogen activator short chain A;Urokinase-type plasminogen activator chain B	PLAU	439
NaN	NaN	NaN	NaN	NaN	NaN	NaN	24.1473	NaN	2	2	2	11	11	11	40.764	0	46.442	138640000	4	P00813	P00813	Adenosine deaminase	ADA	440
NaN	NaN	22.5548	22.0034	NaN	22.3065	NaN	NaN	NaN	6	6	3	46	46	24.9	21.229	0	13.686	104550000	13	P01111;P01116;P01112;P01112-2	P01111;P01116	GTPase NRas;GTPase KRas;GTPase KRas, N-terminally processed	NRAS;KRAS	441
NaN	NaN	NaN	NaN	NaN	NaN	19.7805	NaN	NaN	4	1	1	27.7	6.4	6.4	21.424	0.0011157	2.0596	11116000	1	P01116-2	P01116-2	GTPase KRas;GTPase KRas, N-terminally processed	KRAS	442
24.6432	25.2576	25.0401	23.6073	22.0471	NaN	24.066	25.8214	26.5325	16	16	15	23.7	23.7	22.7	76.855	0	319.53	1218900000	58	P01130-3;P01130-6;P01130-4;P01130;P01130-2;P01130-5	P01130-3;P01130-6;P01130-4;P01130;P01130-2;P01130-5	Low-density lipoprotein receptor	LDLR	443
NaN	NaN	NaN	NaN	NaN	NaN	20.7329	NaN	NaN	1	1	1	5	5	5	20.14	0.0003973	2.5609	19613000	8	P01344;P01344-2;P01344-3	P01344;P01344-2;P01344-3	Insulin-like growth factor II;Insulin-like growth factor II;Insulin-like growth factor II Ala-25 Del;Preptin	IGF2	444
24.3628	25.3604	23.4744	26.9605	27.389	23.0752	22.9586	26.2498	24.8878	15	8	8	39.8	27.1	27.1	40.46	0	323.31	1753300000	46	P01889;P17693-6;P17693-2;P17693-5;P17693	P01889	HLA class I histocompatibility antigen, B-7 alpha chain	HLA-B	445
NaN	22.0512	NaN	24.2827	24.2654	21.4059	23.0001	25.9865	23.7356	9	2	2	22.7	8.3	8.3	40.891	0	24.301	670900000	26	P01893	P01893	Putative HLA class I histocompatibility antigen, alpha chain H	HLA-H	446
NaN	NaN	NaN	NaN	NaN	NaN	NaN	26.616	23.8413	9	9	9	35.8	35.8	35.8	28.607	0	93.731	745920000	24	P01903;P01906	P01903	HLA class II histocompatibility antigen, DR alpha chain	HLA-DRA	447
NaN	NaN	NaN	NaN	NaN	NaN	24.7295	29.2816	26.1832	13	13	8	54.5	54.5	32	29.966	0	323.31	4877000000	74	P01911	P01911	HLA class II histocompatibility antigen, DRB1-15 beta chain	HLA-DRB1	448
23.7853	23.8683	22.8027	26.9533	25.452	24.0765	NaN	NaN	NaN	20	20	20	30.5	30.5	30.5	138.94	0	323.31	1006900000	71	P02452;CON__Q862S4	P02452	Collagen alpha-1(I) chain	COL1A1	449
25.4275	26.3461	24.832	24.227	24.8786	28.4869	26.0561	26.0684	25.8119	36	36	3	59.9	59.9	14.2	74.139	0	323.31	5025700000	266	P02545;P02545-6;P02545-3;P02545-5;P02545-4	P02545;P02545-6;P02545-3;P02545-5;P02545-4	Prelamin-A/C;Lamin-A/C	LMNA	450
22.838	25.6307	22.7708	NaN	21.8695	26.1255	23.0552	25.2239	24.115	35	2	2	57.9	4.7	4.7	65.134	0	176.17	1120300000	28	P02545-2	P02545-2	Prelamin-A/C;Lamin-A/C	LMNA	451
NaN	NaN	NaN	20.6956	NaN	NaN	NaN	NaN	NaN	1	1	1	15.8	15.8	15.8	11.284	0.0068306	1.5587	7076300	1	P02655	P02655	Apolipoprotein C-II;Proapolipoprotein C-II	APOC2	452
NaN	NaN	NaN	21.5376	NaN	NaN	NaN	NaN	NaN	2	2	2	19.2	19.2	19.2	10.852	0	75.792	14144000	3	P02656	P02656	Apolipoprotein C-III	APOC3	453
NaN	NaN	NaN	NaN	NaN	NaN	NaN	NaN	NaN	1	1	1	6.2	6.2	6.2	17.343	0.0071114	1.5006	1073800	1	P02686-6;P02686-5;P02686-4;P02686-3;P02686-2;P02686	P02686-6;P02686-5;P02686-4;P02686-3;P02686-2;P02686	Myelin basic protein	MBP	454
27.8077	28.743	28.0449	26.7853	26.4721	28.7761	27.3712	28.4832	22.117	62	62	62	37.5	37.5	37.5	272.32	0	323.31	12370000000	698	P02751;P02751-7;P02751-1;P02751-3;P02751-17;P02751-6;P02751-8;P02751-14;P02751-9;P02751-5;P02751-13;P02751-10;P02751-11;P02751-4;P02751-12;P02751-16;P02751-2	P02751;P02751-7;P02751-1;P02751-3;P02751-17;P02751-6;P02751-8;P02751-14;P02751-9;P02751-5;P02751-13;P02751-10;P02751-11;P02751-4;P02751-12	Fibronectin;Anastellin;Ugl-Y1;Ugl-Y2;Ugl-Y3	FN1	455
25.5678	27.6292	27.1343	29.5058	29.5363	26.4	25.5467	30.4738	29.4629	38	38	38	45.1	45.1	45.1	84.87	0	323.31	18777000000	337	P02786	P02786	Transferrin receptor protein 1;Transferrin receptor protein 1, serum form	TFRC	456
21.3122	21.7123	NaN	NaN	NaN	NaN	NaN	NaN	NaN	2	2	2	3.4	3.4	3.4	77.063	0.0087513	1.4719	6805600	3	P02787	P02787	Serotransferrin	TF	457
NaN	NaN	NaN	22.0759	22.2206	20.8773	NaN	21.514	NaN	2	2	2	33.8	33.8	33.8	7.9916	0	3.1612	71502000	8	P03928	P03928	ATP synthase protein 8	MT-ATP8	458
21.7066	22.0719	NaN	NaN	21.0209	24.3281	NaN	NaN	23.6235	7	7	7	24.3	24.3	24.3	59.755	0	56.721	217410000	11	P04040	P04040	Catalase	CAT	459
NaN	NaN	NaN	NaN	NaN	NaN	NaN	NaN	19.7148	1	1	1	3.5	3.5	3.5	73.051	0.0067843	1.513	14207000	2	P04049;P04049-2	P04049;P04049-2	RAF proto-oncogene serine/threonine-protein kinase	RAF1	460
NaN	NaN	NaN	NaN	NaN	NaN	NaN	21.0914	21.3469	2	2	2	12.2	12.2	12.2	50.316	0	9.1719	42672000	5	P04062-4;P04062-5;P04062-2;P04062;P04062-3	P04062-4;P04062-5;P04062-2;P04062;P04062-3	Glucosylceramidase	GBA	461
24.3627	25.7248	25.0175	23.6152	25.0854	22.5718	24.8728	23.8827	26.3282	8	8	8	26.1	26.1	26.1	39.42	0	62.742	901010000	32	P04075;P04075-2	P04075;P04075-2	Fructose-bisphosphate aldolase A	ALDOA	462
24.74	22.2111	25.156	NaN	23.4366	NaN	24.9848	22.404	24.2956	3	3	3	55.1	55.1	55.1	11.139	0	175.44	324820000	18	P04080	P04080	Cystatin-B	CSTB	463
27.8699	27.7496	26.7066	27.9388	28.4979	23.9886	29.1529	26.7111	28.5601	29	29	29	58.7	58.7	58.7	38.714	0	323.31	6741100000	275	P04083	P04083	Annexin A1	ANXA1	464
22.6323	23.6067	NaN	25.8291	25.4008	20.8096	23.4347	26.3769	24.1343	2	2	2	7.9	7.9	7.9	27.661	0	323.31	1049700000	44	P04156	P04156	Major prion protein	PRNP	465
NaN	NaN	NaN	NaN	NaN	NaN	NaN	NaN	21.1691	3	3	3	11.8	11.8	11.8	48.534	0	3.7677	24512000	3	P04181;P04181-2	P04181;P04181-2	Ornithine aminotransferase, mitochondrial;Ornithine aminotransferase, hepatic form;Ornithine aminotransferase, renal form	OAT	466
NaN	NaN	NaN	20.5416	NaN	NaN	NaN	NaN	21.8341	2	2	2	17.9	17.9	17.9	25.468	0.0031701	1.7784	55803000	2	P04183	P04183	Thymidine kinase, cytosolic	TK1	467
25.654	27.3103	26.6838	28.5714	28.0789	26.0866	NaN	NaN	NaN	4	4	4	13	13	13	17.935	0	123.13	2959800000	67	P04216	P04216	Thy-1 membrane glycoprotein	THY1	468
NaN	NaN	NaN	NaN	NaN	NaN	NaN	NaN	22.1062	1	1	1	8.8	8.8	8.8	18.328	0.0028531	1.8325	111410000	2	P04233-3;P04233-2;P04233	P04233-3;P04233-2;P04233	HLA class II histocompatibility antigen gamma chain	CD74	469
NaN	22.1648	NaN	21.8797	NaN	NaN	22.3497	22.5675	22.9828	36	2	0	66.7	4.3	0	49.585	0	76.897	147400000	10	P04350;A6NNZ2	P04350	Tubulin beta-4A chain	TUBB4A	471
28.3658	29.4005	28.693	29.3796	28.6113	27.0331	28.9697	28.3021	29.6845	23	23	23	65.1	65.1	65.1	36.053	0	323.31	16276000000	422	P04406;P04406-2	P04406;P04406-2	Glyceraldehyde-3-phosphate dehydrogenase	GAPDH	472
25.7647	27.5405	26.3798	28.5466	28.5787	23.4221	27.4932	31.0597	28.6365	16	16	8	34.8	34.8	16.2	40.84	0	323.31	20059000000	413	P04439;P04439-2	P04439;P04439-2	HLA class I histocompatibility antigen, A-3 alpha chain	HLA-A	473
NaN	NaN	NaN	NaN	NaN	NaN	NaN	21.5543	NaN	2	1	1	15.9	12.4	12.4	29.159	0.00078064	2.4311	19455000	1	P04440	P04440	HLA class II histocompatibility antigen, DP beta 1 chain	HLA-DPB1	474
NaN	NaN	NaN	22.6926	NaN	NaN	NaN	NaN	NaN	3	2	2	9.1	7	7	62.567	0	2.7515	60751000	6	P04626-3;P04626-2;P04626-5;P04626-4;P04626;P04626-6;Q15303-4;Q15303-3;Q15303-2;Q15303	P04626-3;P04626-2;P04626-5;P04626-4;P04626;P04626-6	Receptor tyrosine-protein kinase erbB-2	ERBB2	475
22.031	23.1543	23.2366	25.1245	24.2985	21.6942	22.6766	25.8978	25.1565	7	7	7	36.6	36.6	36.6	28.315	0	50.502	901010000	34	P04632	P04632	Calpain small subunit 1	CAPNS1	476
27.0794	26.4488	26.3282	28.6351	26.0369	28.0071	25.7608	26.2049	25.5658	12	12	12	85.9	85.9	85.9	22.782	0	323.31	5119000000	216	P04792	P04792	Heat shock protein beta-1	HSPB1	477
NaN	NaN	NaN	NaN	NaN	NaN	NaN	20.6571	21.6525	2	2	2	14.4	14.4	14.4	35.716	0	2.9212	31358000	2	P04818;P04818-3;P04818-2	P04818;P04818-3;P04818-2	Thymidylate synthase	TYMS	478
27.8197	28.8839	28.7884	29.663	28.9244	29.051	27.8765	28.828	28.966	44	44	44	73.1	73.1	73.1	68.569	0	323.31	18752000000	449	P04843	P04843	Dolichyl-diphosphooligosaccharide--protein glycosyltransferase subunit 1	RPN1	479
23.5584	24.6414	24.8644	25.9641	24.7488	26.2857	23.7665	24.8753	25.2861	13	13	13	33.6	33.6	33.6	69.283	0	210.33	1374000000	51	P04844;P04844-2	P04844;P04844-2	Dolichyl-diphosphooligosaccharide--protein glycosyltransferase subunit 2	RPN2	480
25.2357	26.3202	26.1486	26.8605	26.9654	25.5709	25.1734	27.9463	28.5976	20	20	13	48.2	48.2	37.5	40.45	0	323.31	5137300000	204	P04899;P04899-4;P04899-3;P04899-5;P04899-2;P04899-6;P11488;P19087;P09471-2;A8MTJ3	P04899;P04899-4;P04899-3;P04899-5;P04899-2;P04899-6	Guanine nucleotide-binding protein G(i) subunit alpha-2	GNAI2	481
NaN	21.5351	NaN	22.4646	NaN	NaN	NaN	23.0987	21.6252	5	5	5	8.3	8.3	8.3	135.6	0	94.706	116590000	8	P04920-2;P04920-3;P04920	P04920-2;P04920-3;P04920	Anion exchange protein 2	SLC4A2	482
NaN	NaN	NaN	22.3292	NaN	NaN	NaN	NaN	NaN	1	1	1	29	29	29	11.499	0	3.2112	21957000	2	P04921-2;P04921-3;P04921	P04921-2;P04921-3;P04921	Glycophorin-C	GYPC	483
27.62	27.8735	28.111	30.6665	29.771	28.0458	27.2976	28.9218	28.4171	49	49	27	50.1	50.1	31.8	109.55	0	323.31	16875000000	465	P05023-3;P05023-4;P05023;P05023-2;Q13733;P54707;P54707-2;P20648	P05023-3;P05023-4;P05023;P05023-2	Sodium/potassium-transporting ATPase subunit alpha-1	ATP1A1	484
23.0508	23.8075	22.0576	27.8507	27.3026	24.4581	21.2358	25.1921	23.8078	9	9	9	38.9	38.9	38.9	34.893	0	246.53	1838600000	66	P05026-2;P05026	P05026-2;P05026	Sodium/potassium-transporting ATPase subunit beta-1	ATP1B1	485
NaN	NaN	NaN	NaN	NaN	NaN	NaN	NaN	23.2582	2	2	2	2.6	2.6	2.6	82.915	0	5.3521	369590000	7	P05067-7;P05067-11;P05067-8;P05067-9;P05067;P05067-2;P05067-10;P05067-3;P05067-4;P05067-5;P05067-6	P05067-7;P05067-11;P05067-8;P05067-9;P05067;P05067-2;P05067-10;P05067-3;P05067-4;P05067-5;P05067-6	Amyloid beta A4 protein;N-APP;Soluble APP-alpha;Soluble APP-beta;C99;Beta-amyloid protein 42;Beta-amyloid protein 40;C83;P3(42);P3(40);C80;Gamma-secretase C-terminal fragment 59;Gamma-secretase C-terminal fragment 57;Gamma-secretase C-terminal fragment 50;C31	APP	486
25.7823	26.1952	25.646	27.2985	27.4168	23.958	27.5251	30.3083	28.6207	21	21	21	28.6	28.6	28.6	87.057	0	323.31	13083000000	161	P05106;P05106-2;P05106-3	P05106;P05106-2;P05106-3	Integrin beta-3	ITGB3	487
NaN	NaN	NaN	NaN	NaN	NaN	NaN	NaN	22.4983	2	2	2	7.2	7.2	7.2	46.596	0	8.3728	42879000	3	P05120	P05120	Plasminogen activator inhibitor 2	SERPINB2	488
23.7236	25.4631	24.9404	24.1602	23.9521	NaN	25.2593	22.1421	22.3386	3	3	3	14.5	14.5	14.5	43.404	0	14.813	356490000	21	P05121-2;P05121	P05121-2;P05121	Plasminogen activator inhibitor 1	SERPINE1	489
27.3632	27.0653	26.2342	28.6969	28.3413	27.2584	27.6575	26.7352	27.8557	23	23	13	61.7	61.7	42.6	32.852	0	323.31	7207200000	183	P05141;Q9H0C2	P05141	ADP/ATP translocase 2;ADP/ATP translocase 2, N-terminally processed	SLC25A5	490
NaN	NaN	NaN	NaN	NaN	NaN	NaN	22.1818	NaN	5	5	5	10.4	10.4	10.4	75.001	0	10.276	120130000	7	P05165-3;P05165-2;P05165	P05165-3;P05165-2;P05165	Propionyl-CoA carboxylase alpha chain, mitochondrial	PCCA	491
NaN	NaN	NaN	NaN	NaN	NaN	NaN	NaN	NaN	6	6	6	15.4	15.4	15.4	58.215	0	15.031	98609000	11	P05166;P05166-2	P05166;P05166-2	Propionyl-CoA carboxylase beta chain, mitochondrial	PCCB	492
23.9055	24.2463	23.3381	23.7931	23.6191	24.8063	24.6912	23.3661	23.7014	12	12	12	52.4	52.4	52.4	36.112	0	66.962	578190000	28	P05198	P05198	Eukaryotic translation initiation factor 2 subunit 1	EIF2S1	493
23.5226	24.4007	NaN	NaN	NaN	NaN	NaN	22.0951	NaN	4	4	4	12.8	12.8	12.8	57.825	0	6.1618	85479000	7	P05362	P05362	Intercellular adhesion molecule 1	ICAM1	494
25.5933	25.5311	25.7415	24.6676	24.5753	26.3971	25.281	24.534	24.8021	5	4	4	99.1	84.2	84.2	11.514	0	323.31	2194600000	54	P05386;P05386-2	P05386	60S acidic ribosomal protein P1	RPLP1	495
22.1207	22.8603	NaN	19.6685	21.3261	25.1647	21.8973	21.6532	21.0419	11	11	10	100	100	85.2	11.665	0	45.032	620650000	37	P05387	P05387	60S acidic ribosomal protein P2	RPLP2	496
22.7818	21.6768	22.0037	21.6161	NaN	25.9546	22.8089	21.8619	20.9058	12	12	12	47.3	47.3	47.3	34.273	0	100.58	690580000	40	P05388;P05388-2;Q8NHW5	P05388;P05388-2;Q8NHW5	60S acidic ribosomal protein P0;60S acidic ribosomal protein P0-like	RPLP0;RPLP0P6	497
28.57	28.5663	28.2353	29.2105	28.7996	25.8609	29.041	31.2551	30.7955	38	38	38	38.2	38.2	38.2	88.414	0	323.31	36986000000	587	P05556;P05556-2;P05556-5;P05556-4;P05556-3	P05556;P05556-2;P05556-5;P05556-4;P05556-3	Integrin beta-1	ITGB1	498
24.0091	23.3782	23.1442	NaN	NaN	NaN	NaN	NaN	NaN	5	5	4	22.8	22.8	20.7	48.057	0	11.578	78082000	8	P05783;CON__H-INV:HIT000015463	P05783	Keratin, type I cytoskeletal 18	KRT18	499
NaN	22.7715	NaN	22.2572	NaN	NaN	NaN	NaN	NaN	1	1	1	10.7	10.7	10.7	16.684	0	191.99	396920000	15	P05976-2;P05976;P08590	P05976-2;P05976;P08590	Myosin light chain 1/3, skeletal muscle isoform;Myosin light chain 3	MYL1;MYL3	500
22.6929	21.598	NaN	21.4481	NaN	24.1926	23.0553	22.1971	23.3619	16	16	9	30.2	30.2	21.1	80.64	0	104.08	631900000	44	P06396-2;P06396-4;P06396-3;P06396	P06396-2;P06396-4;P06396-3;P06396	Gelsolin	GSN	501
NaN	NaN	NaN	NaN	NaN	NaN	NaN	NaN	20.4128	1	1	1	2.3	2.3	2.3	106.16	0.00285	1.8294	26289000	1	P06400	P06400	Retinoblastoma-associated protein	RB1	502
22.9317	23.9896	23.6059	23.3888	22.8965	NaN	22.1704	24.0634	23.4324	6	6	5	17.8	17.8	15.2	34.095	0	48.66	279380000	15	P06493;P06493-2;P11802-2;P50750-2;Q9NYV4;Q9NYV4-2;Q14004-2;Q9NYV4-3;Q00536-2;Q00537-2;Q00537;Q07002-3;Q00536-3;Q00536;Q07002;O94921;O94921-2;Q96Q40;Q96Q40-5;O94921-3;Q96Q40-3;Q96Q40-4;P50750;Q96Q40-6;Q00534;Q14004	P06493;P06493-2	Cyclin-dependent kinase 1	CDK1	503
28.763	28.9962	29.069	29.3779	29.1848	29.9699	27.9374	28.5721	28.1426	38	38	38	79.6	79.6	79.6	56.559	0	323.31	17537000000	587	P06576	P06576	ATP synthase subunit beta, mitochondrial	ATP5B	504
24.8559	28.1174	26.748	26.189	27.6051	24.2631	25.152	28.197	27.8908	6	6	6	48.9	48.9	48.9	10.18	0	323.31	5971400000	141	P06703	P06703	Protein S100-A6	S100A6	505
28.2629	28.8462	27.7237	29.7969	28.6687	27.5769	29.2895	28.1149	30.0274	31	31	27	84.8	84.8	77.6	47.168	0	323.31	15371000000	393	P06733;P06733-2;P13929-3;P13929-2;P13929	P06733;P06733-2	Alpha-enolase	ENO1	506
22.262	22.2608	22.2762	23.1671	22.3564	20.9737	22.6098	21.2312	23.1818	5	5	4	15.2	15.2	12.5	63.146	0	100.55	160760000	20	P06744;P06744-2	P06744;P06744-2	Glucose-6-phosphate isomerase	GPI	507
NaN	NaN	NaN	NaN	22.8148	NaN	NaN	NaN	NaN	2	2	2	12.2	12.2	12.2	38.177	0.00076923	2.2956	77533000	7	P06746	P06746	DNA polymerase beta	POLB	508
28.1108	25.3636	25.5989	27.7462	26.1022	29.439	28.9915	27.0158	28.6086	11	11	11	53.7	53.7	53.7	32.575	0	323.31	12658000000	314	P06748;P06748-2;P06748-3	P06748;P06748-2;P06748-3	Nucleophosmin	NPM1	509
27.8403	27.5545	27.4375	28.1347	26.5973	27.9138	27.4242	27.2138	27.8752	18	18	14	67.7	67.7	48	29.032	0	323.31	8119800000	238	P06753-2;P06753-3;P06753-5;P06753-6;P06753-4;P06753;P06753-7	P06753-2;P06753-3;P06753-5;P06753-6;P06753-4	Tropomyosin alpha-3 chain	TPM3	510
25.5292	26.5308	25.8511	27.7503	27.8463	25.1627	26.2122	28.83	26.8309	25	25	25	31.9	31.9	31.9	111.13	0	323.31	5938000000	268	P06756-3;P06756-2;P06756	P06756-3;P06756-2;P06756	Integrin alpha-V;Integrin alpha-V heavy chain;Integrin alpha-V light chain	ITGAV	511
22.8362	NaN	NaN	NaN	NaN	25.1756	NaN	22.9267	NaN	11	3	0	54	10.3	0	13.92	0	7.5321	310440000	9	Q16778;P33778;P23527;P06899;Q6DRA6;Q6DN03	Q16778;P33778;P23527;P06899	Histone H2B type 2-E;Histone H2B type 1-B;Histone H2B type 1-O;Histone H2B type 1-J	HIST2H2BE;HIST1H2BB;HIST1H2BO;HIST1H2BJ	512
26.0949	NaN	26.7116	NaN	NaN	NaN	25.7771	NaN	NaN	3	3	3	36.8	36.8	36.8	10.044	0	179.88	255680000	16	P07108;P07108-6;P07108-3;P07108-2;P07108-4;P07108-5	P07108;P07108-6	Acyl-CoA-binding protein	DBI	513
NaN	22.9271	NaN	23.2588	NaN	21.2216	22.649	22.6664	25.2857	6	5	5	27.5	23.4	23.4	36.638	0	16.27	377970000	15	P07195	P07195	L-lactate dehydrogenase B chain	LDHB	514
NaN	NaN	NaN	20.8864	NaN	NaN	NaN	20.3205	22.6454	1	1	1	6.4	6.4	6.4	60.329	0	3.0411	58138000	3	P07204	P07204	Thrombomodulin	THBD	515
NaN	NaN	NaN	21.4658	NaN	22.5422	NaN	NaN	23.1229	3	3	3	15.6	15.6	15.6	57.116	0	8.3039	143660000	5	P07237	P07237	Protein disulfide-isomerase	P4HB	516
NaN	NaN	NaN	NaN	NaN	24.0669	22.0834	NaN	NaN	2	2	2	20.3	20.3	20.3	19.167	0	7.5161	111710000	5	P07305-2;P07305	P07305-2;P07305	Histone H1.0;Histone H1.0, N-terminally processed	H1F0	517
23.4686	25.3296	22.5197	25.0628	22.719	22.6328	22.937	NaN	21.8355	9	9	9	34	34	34	44.552	0	41.354	277530000	23	P07339	P07339	Cathepsin D;Cathepsin D light chain;Cathepsin D heavy chain	CTSD	518
30.9494	30.7176	30.3808	30.1181	31.1326	29.9836	29.8009	30.6132	31.2195	57	57	57	92	92	92	38.604	0	323.31	54413000000	1301	P07355;P07355-2;A6NMY6	P07355;P07355-2;A6NMY6	Annexin A2;Putative annexin A2-like protein	ANXA2;ANXA2P2	519
24.5006	23.2784	24.3242	25.4134	24.7583	NaN	24.1557	24.4232	23.6654	15	15	15	26.9	26.9	26.9	81.889	0	74.436	666390000	58	P07384	P07384	Calpain-1 catalytic subunit	CAPN1	520
28.4239	28.3794	28.3771	29.4599	29.2685	28.2756	27.8674	29.1925	29.511	45	11	9	76.6	30.4	21.2	49.67	0	323.31	20300000000	346	P07437	P07437	Tubulin beta chain	TUBB	521
NaN	NaN	NaN	22.0378	NaN	NaN	NaN	NaN	NaN	2	2	2	5.6	5.6	5.6	63.111	0	4.792	45482000	4	P07686	P07686	Beta-hexosaminidase subunit beta;Beta-hexosaminidase subunit beta chain B;Beta-hexosaminidase subunit beta chain A	HEXB	522
NaN	NaN	NaN	22.7783	22.7089	20.983	25.3473	23.5829	24.2617	4	4	4	12.3	12.3	12.3	37.564	0	306.04	338980000	37	P07711	P07711	Cathepsin L1;Cathepsin L1 heavy chain;Cathepsin L1 light chain	CTSL	523
NaN	NaN	NaN	NaN	NaN	NaN	NaN	NaN	22.5843	1	1	1	12.9	12.9	12.9	15.054	0	4.6417	86199000	6	P07737	P07737	Profilin-1	PFN1	524
NaN	NaN	NaN	NaN	NaN	NaN	NaN	NaN	20.4481	1	1	1	8.2	8.2	8.2	14.557	0.00078895	2.5003	22357000	1	P07741-2;P07741	P07741-2;P07741	Adenine phosphoribosyltransferase	APRT	525
23.1613	22.435	23.3425	22.4138	NaN	23.7761	22.807	21.828	NaN	10	10	10	12	12	12	170.59	0	22.753	241820000	24	P07814	P07814	Bifunctional glutamate/proline--tRNA ligase;Glutamate--tRNA ligase;Proline--tRNA ligase	EPRS	526
21.5368	24.6788	22.7195	23.2177	25.3787	23.1014	24.5876	26.1918	26.1863	8	8	8	20.6	20.6	20.6	37.821	0	62.576	1584200000	38	P07858	P07858	Cathepsin B;Cathepsin B light chain;Cathepsin B heavy chain	CTSB	527
24.2584	25.6277	24.2567	25.9022	24.6256	24.4396	24.0834	25.2794	26.0763	24	15	15	36.3	26.2	26.2	98.16	0	210.77	1238300000	75	P07900-2;P07900;Q14568	P07900-2;P07900	Heat shock protein HSP 90-alpha	HSP90AA1	528
NaN	NaN	NaN	NaN	NaN	22.5883	NaN	NaN	NaN	21	1	1	47.7	11.8	11.8	33.67	0	13.134	32105000	4	P07910;O60812;B2RXH8;P07910-3;P0DMR1;B7ZW38	P07910	Heterogeneous nuclear ribonucleoproteins C1/C2	HNRNPC	529
29.2154	22.8708	23.0314	26.6299	22.8158	28.9251	29.6026	25.5915	27.2498	24	24	4	53.6	53.6	12.4	27.821	0	323.31	11449000000	473	P07910-4;P07910-2	P07910-4;P07910-2	Heterogeneous nuclear ribonucleoproteins C1/C2	HNRNPC	530
25.204	24.2043	23.3437	25.0073	24.7947	24.9551	25.1638	23.7343	24.0487	6	6	6	79.1	79.1	79.1	10.739	0	323.31	941100000	92	P07919;A0A096LP55	P07919	Cytochrome b-c1 complex subunit 6, mitochondrial	UQCRH	531
23.0621	22.4659	NaN	NaN	NaN	21.988	21.1	NaN	NaN	5	5	5	4.3	4.3	4.3	198.04	0	24.413	91066000	18	P07942	P07942	Laminin subunit beta-1	LAMB1	532
NaN	21.7773	NaN	21.6437	21.109	20.6912	21.4262	24.0873	23.8321	4	4	3	14.4	14.4	12.3	60.801	0	51.048	255120000	16	P07947	P07947	Tyrosine-protein kinase Yes	YES1	533
23.2115	23.9485	NaN	23.3799	NaN	22.4558	23.4785	NaN	NaN	4	4	4	19.7	19.7	19.7	50.212	0	12.853	157490000	5	P07954-2;P07954	P07954-2;P07954	Fumarate hydratase, mitochondrial	FH	535
22.3875	22.0263	NaN	24.7146	24.517	25.9457	NaN	23.5356	NaN	13	13	13	18.5	18.5	18.5	129.31	0	197.71	817510000	45	P08123	P08123	Collagen alpha-2(I) chain	COL1A2	537
24.5382	25.3519	22.2479	26.1933	26.011	23.8518	23.8508	21.417	23.6521	23	23	23	39.8	39.8	39.8	75.872	0	197.5	739480000	57	P08133;P08133-2	P08133;P08133-2	Annexin A6	ANXA6	538
NaN	NaN	NaN	NaN	NaN	23.4125	NaN	NaN	NaN	5	2	2	35.2	7.3	7.3	22.006	0.00078616	2.476	109300000	4	P08134	P08134	Rho-related GTP-binding protein RhoC	RHOC	539
21.8128	21.9849	NaN	22.1426	21.6891	NaN	NaN	22.9709	21.7307	28	1	1	43.1	3	3	61.815	0	64.682	110530000	22	P08195-3;P08195;P08195-4	P08195-3;P08195;P08195-4	4F2 cell-surface antigen heavy chain	SLC3A2	540
26.7892	28.2181	27.7199	30.2864	29.4024	26.7064	28.044	29.5663	28.234	28	28	1	50.3	50.3	7.2	57.944	0	323.31	15330000000	350	P08195-2	P08195-2	4F2 cell-surface antigen heavy chain	SLC3A2	541
22.2816	NaN	NaN	21.9581	NaN	22.217	NaN	24.1283	24.2669	9	8	8	16.6	15.5	15.5	93.253	0	70.119	318300000	13	P08237-3;P08237;P08237-2	P08237-3;P08237;P08237-2	ATP-dependent 6-phosphofructokinase, muscle type	PFKM	542
26.7591	27.6026	27.6985	28.7593	27.6696	27.531	27.2057	28.1647	28.6531	40	40	28	54.3	54.3	41.4	83.263	0	323.31	9739400000	382	P08238;Q58FF7	P08238	Heat shock protein HSP 90-beta	HSP90AB1	543
23.3924	24.1638	23.0837	23.7345	24.4811	22.6614	NaN	22.3543	23.2414	10	10	10	19.2	19.2	19.2	66.558	0	37.484	385810000	21	P08240-2;P08240	P08240-2;P08240	Signal recognition particle receptor subunit alpha	SRPR	544
NaN	NaN	NaN	21.4153	NaN	NaN	NaN	NaN	NaN	2	2	2	9.2	9.2	9.2	54.817	0	2.9807	38072000	4	P08243-3;P08243-2;P08243	P08243-3;P08243-2;P08243	Asparagine synthetase [glutamine-hydrolyzing]	ASNS	545
NaN	NaN	NaN	21.9704	22.7928	21.8617	23.4211	23.6897	22.859	8	8	8	14.4	14.4	14.4	65.764	0	147	231640000	17	P08253-2;P08253-3;P08253	P08253-2;P08253-3;P08253	72 kDa type IV collagenase;PEX	MMP2	546
23.0523	24.185	23.3488	23.3427	NaN	NaN	NaN	NaN	22.1888	3	3	3	9.2	9.2	9.2	85.513	0	9.437	149910000	10	P08473	P08473	Neprilysin	MME	547
NaN	NaN	NaN	21.1947	NaN	NaN	20.9227	22.2472	21.2164	4	4	4	15	15	15	40.188	0	3.8748	77127000	5	P08559-3;P08559;P08559-2;P08559-4;P29803	P08559-3;P08559;P08559-2;P08559-4	Pyruvate dehydrogenase E1 component subunit alpha, somatic form, mitochondrial	PDHA1	548
23.8594	24.6713	24.4018	26.6577	25.5681	26.3738	23.8959	25.2955	25.6836	6	6	6	21.8	21.8	21.8	35.422	0	107.41	1914200000	59	P08574	P08574	Cytochrome c1, heme protein, mitochondrial	CYC1	549
NaN	NaN	NaN	NaN	NaN	20.2859	NaN	NaN	NaN	1	1	1	5.8	5.8	5.8	25.486	0.0014641	1.9855	7138800	1	P08579	P08579	U2 small nuclear ribonucleoprotein B	SNRPB2	550
NaN	21.3237	NaN	22.7653	22.4563	NaN	NaN	23.437	21.6487	6	6	5	6.7	6.7	6.1	155.54	0	45.628	147670000	11	P08581;P08581-2;P42685-2;Q9H3Y6;P42685;P08581-3;Q04912-7;Q04912-2;Q04912	P08581;P08581-2	Hepatocyte growth factor receptor	MET	551
27.5247	27.2364	27.4328	28.0058	27.8478	25.1283	27.7583	29.6418	29.3148	30	30	30	29.9	29.9	29.9	114.54	0	323.31	13064000000	389	P08648	P08648	Integrin alpha-5;Integrin alpha-5 heavy chain;Integrin alpha-5 light chain	ITGA5	552
30.9038	28.9257	29.1748	29.9091	29.674	32.5371	32.3379	31.7734	30.4256	76	76	74	93.8	93.8	91.2	53.651	0	323.31	138070000000	2743	P08670;P41219;P41219-2;P17661;P07197-2;P07197;P07196;P12036-2;P12036	P08670	Vimentin	VIM	553
24.0013	23.9906	24.801	23.0541	22.455	24.0331	24.4731	24.6403	23.6089	10	10	10	63.7	63.7	63.7	15.55	0	58.534	825400000	64	P08708	P08708	40S ribosomal protein S17	RPS17	554
NaN	NaN	NaN	21.57	23.9256	21.9138	NaN	23.1325	23.5533	13	8	8	32.8	26.6	26.6	40.532	0	24.768	234120000	14	P08754	P08754	Guanine nucleotide-binding protein G(k) subunit alpha	GNAI3	555
27.1865	27.8029	25.8874	27.8241	27.8093	23.0368	26.9704	23.9596	26.3639	18	18	18	45.6	45.6	45.6	35.936	0	323.31	2909900000	123	P08758	P08758	Annexin A5	ANXA5	556
24.6026	23.9316	24.2204	24.14	23.4939	23.6885	24.8423	23.2073	24.1812	8	8	8	34.9	34.9	34.9	32.854	0	178.83	648760000	55	P08865	P08865	40S ribosomal protein SA	RPSA	557
NaN	NaN	NaN	NaN	NaN	NaN	NaN	NaN	18.7987	1	1	1	6.4	6.4	6.4	17.271	0	81.405	42898000	3	P08962-3;P08962-2;P08962	P08962-3;P08962-2;P08962	CD63 antigen	CD63	558
NaN	NaN	NaN	NaN	24.4006	NaN	NaN	NaN	NaN	6	2	2	21.2	9.5	9.5	42.707	0	6.368	154780000	7	P09104-2;P09104	P09104-2;P09104	Gamma-enolase	ENO2	559
NaN	NaN	NaN	NaN	NaN	22.0381	NaN	22.9705	22.5557	3	3	3	18.7	18.7	18.7	34.664	0	7.9562	132260000	10	P09110-2;P09110	P09110-2;P09110	3-ketoacyl-CoA thiolase, peroxisomal	ACAA1	560
21.6117	22.3636	NaN	NaN	22.3022	21.6594	21.4105	22.2755	23.1066	4	4	4	23.3	23.3	23.3	23.356	0	36.931	159650000	7	P09211	P09211	Glutathione S-transferase P	GSTP1	561
25.2459	27.0047	25.6858	26.894	27.91	25.0236	27.694	28.2014	27.5877	14	14	14	95.6	95.6	95.6	14.716	0	323.31	5416600000	247	P09382	P09382	Galectin-1	LGALS1	562
24.0446	25.1432	23.6967	NaN	23.3431	22.623	22.7311	NaN	21.9182	3	3	3	23.3	23.3	23.3	24.893	0	5.815	169190000	13	P09429;B2RPK0	P09429	High mobility group protein B1	HMGB1	563
NaN	NaN	NaN	NaN	NaN	NaN	NaN	NaN	NaN	4	1	1	14.4	9	9	40.05	0	7.3305	0	1	P09471	P09471	Guanine nucleotide-binding protein G(o) subunit alpha	GNAO1	564
NaN	23.5634	NaN	25.3263	25.0988	25.4969	NaN	22.7824	22.6006	7	7	7	20.1	20.1	20.1	34.632	0	54.78	571670000	18	P09486	P09486	SPARC	SPARC	565
NaN	NaN	NaN	NaN	NaN	NaN	NaN	NaN	NaN	11	2	0	57	7	0	26.68	0	3.4667	35209000	4	P09493-2;P09493-7;P09493-6	P09493-2;P09493-7	Tropomyosin alpha-1 chain	TPM1	566
21.6606	21.377	20.9162	25.4255	21.6834	25.4848	NaN	NaN	NaN	17	14	6	54.6	42.6	11.6	32.876	0	149.41	1784700000	34	P09493-3;P09493-4;P09493-10;P09493-9;P09493;P09493-8	P09493-3;P09493-4;P09493-10;P09493-9;P09493;P09493-8	Tropomyosin alpha-1 chain	TPM1	567
NaN	NaN	NaN	NaN	NaN	NaN	NaN	NaN	NaN	10	3	3	43.7	10.6	10.6	28.385	0	168.41	84791000	7	P09493-5	P09493-5	Tropomyosin alpha-1 chain	TPM1	568
25.6122	24.046	24.3133	23.9191	22.859	26.4284	25.605	24.1124	23.8818	9	9	9	35.8	35.8	35.8	23.662	0	323.31	1486300000	83	P09496-2;P09496-5;P09496-4;P09496-3;P09496	P09496-2;P09496-5;P09496-4;P09496-3;P09496	Clathrin light chain A	CLTA	569
23.0731	22.1989	NaN	NaN	NaN	23.0822	22.8025	NaN	NaN	3	3	3	15.6	15.6	15.6	23.181	0	66.06	153720000	6	P09497-2;P09497	P09497-2;P09497	Clathrin light chain B	CLTB	570
NaN	22.3612	NaN	NaN	22.3134	NaN	NaN	NaN	NaN	2	2	2	5	5	5	35.882	0.00076834	2.2815	46325000	5	P09525	P09525	Annexin A4	ANXA4	571
23.3526	24.5757	24.7144	23.974	24.2463	25.1734	23.5158	24.4302	24.4836	8	8	8	38.9	38.9	38.9	45.098	0	35.384	748240000	35	P09543-2;P09543	P09543-2;P09543	2,3-cyclic-nucleotide 3-phosphodiesterase	CNP	572
NaN	NaN	NaN	22.0237	21.6684	NaN	NaN	22.0506	22.7036	4	4	4	15.3	15.3	15.3	32.818	0	19.35	98573000	3	P09601	P09601	Heme oxygenase 1	HMOX1	573
NaN	NaN	NaN	21.8475	NaN	NaN	NaN	NaN	NaN	3	3	3	10.5	10.5	10.5	29.215	0	32.484	15725000	3	P09603-3;P09603-2;P09603	P09603-3;P09603-2;P09603	Macrophage colony-stimulating factor 1;Processed macrophage colony-stimulating factor 1	CSF1	574
NaN	22.7811	NaN	26.1583	26.1028	23.3396	NaN	24.3695	22.8363	17	17	17	19.7	19.7	19.7	123.97	0	82.38	679470000	38	P09619;P09619-2	P09619	Platelet-derived growth factor receptor beta	PDGFRB	575
NaN	NaN	NaN	NaN	NaN	22.0427	NaN	21.9758	22.5409	3	3	3	13.4	13.4	13.4	54.177	0	14.71	103250000	6	P09622;P09622-3;P09622-2	P09622;P09622-3;P09622-2	Dihydrolipoyl dehydrogenase, mitochondrial	DLD	576
26.812	23.7293	23.1696	24.5985	23.6883	28.0536	28.1932	23.3507	26.79	10	10	10	42.7	42.7	42.7	38.746	0	173.2	4438200000	89	P09651;P09651-2;P09651-3;Q32P51	P09651;P09651-2;P09651-3	Heterogeneous nuclear ribonucleoprotein A1;Heterogeneous nuclear ribonucleoprotein A1, N-terminally processed	HNRNPA1	577
NaN	NaN	NaN	NaN	NaN	NaN	NaN	NaN	NaN	2	2	2	5.1	5.1	5.1	28.415	0	3.0328	12996000	1	P09661	P09661	U2 small nuclear ribonucleoprotein A	SNRPA1	578
NaN	23.3821	NaN	22.5163	23.3141	23.29	NaN	23.0279	22.3923	3	3	3	26.7	26.7	26.7	8.7813	0	4.8897	239880000	8	P09669	P09669	Cytochrome c oxidase subunit 6C	COX6C	579
24.774	22.6788	NaN	22.1775	23.3491	25.0711	22.632	21.2893	21.7812	11	11	11	16.3	16.3	16.3	113.08	0	23.301	440330000	24	P09874	P09874	Poly [ADP-ribose] polymerase 1	PARP1	580
21.8051	22.636	NaN	NaN	NaN	20.4661	21.2559	22.7662	24.1179	4	4	4	20.2	20.2	20.2	24.824	0	10.631	213710000	7	P09936	P09936	Ubiquitin carboxyl-terminal hydrolase isozyme L1	UCHL1	581
NaN	NaN	NaN	20.8827	NaN	26.5351	NaN	20.7081	22.0867	9	8	8	63.3	63.3	63.3	13.509	0	323.31	665300000	43	Q71UI9;P0C0S5;Q71UI9-4;Q71UI9-2;Q71UI9-3;Q71UI9-5	Q71UI9;P0C0S5;Q71UI9-4;Q71UI9-2	Histone H2A.V;Histone H2A.Z	H2AFV;H2AFZ	582
28.2683	26.6842	24.9112	25.3808	23.7648	30.3993	28.6526	26.5068	27.1792	15	15	0	77.3	77.3	0	13.936	0	323.31	18744000000	241	Q99878;Q96KK5;P0C0S8;Q9BTM1;Q9BTM1-2	Q99878;Q96KK5;P0C0S8;Q9BTM1;Q9BTM1-2	Histone H2A type 1-J;Histone H2A type 1-H;Histone H2A type 1;Histone H2A.J	HIST1H2AJ;HIST1H2AH;HIST1H2AG;H2AFJ	583
NaN	NaN	NaN	NaN	NaN	NaN	NaN	NaN	21.4243	1	1	1	4.7	4.7	4.7	29.668	0	7.9033	44423000	2	P47985;P0C7P4	P47985;P0C7P4	Cytochrome b-c1 complex subunit Rieske, mitochondrial;Cytochrome b-c1 complex subunit 11;Putative cytochrome b-c1 complex subunit Rieske-like protein 1	UQCRFS1;UQCRFS1P1	584
NaN	NaN	NaN	NaN	NaN	NaN	NaN	NaN	22.8307	1	1	1	31.1	31.1	31.1	5.2288	0	2.8514	61119000	1	P0CG35;P0CG34	P0CG35;P0CG34	Thymosin beta-15B;Thymosin beta-15A	TMSB15B;TMSB15A	585
NaN	NaN	NaN	NaN	NaN	NaN	NaN	21.106	NaN	1	1	1	6.6	6.6	6.6	48.709	0.0048276	1.6265	21897000	1	P0CW27	P0CW27	Coiled-coil domain-containing protein 166	CCDC166	586
24.3908	24.7114	23.8886	23.7253	24.347	23.2354	22.8291	22.3525	24.0654	11	9	6	25.7	23.7	16.5	70.051	0	64.177	373680000	45	P0DMV8;P0DMV9;P0DMV8-2	P0DMV8;P0DMV9;P0DMV8-2	Heat shock 70 kDa protein 1A;Heat shock 70 kDa protein 1B	HSPA1A;HSPA1B	587
NaN	NaN	NaN	22.9597	22.2016	23.4364	22.6154	NaN	21.2193	4	4	4	24.6	24.6	24.6	27.872	0	20.815	184130000	11	P0DN76;Q01081-2;Q01081;Q01081-4;Q01081-3;Q8WU68-3;Q8WU68-2;Q8WU68	P0DN76;Q01081-2;Q01081;Q01081-4	Splicing factor U2AF 35 kDa subunit	U2AF1	588
NaN	NaN	NaN	21.5015	NaN	NaN	NaN	NaN	NaN	2	2	2	4.2	4.2	4.2	60.586	0.0051564	1.6005	21229000	2	P0DN79;P35520;P35520-2	P0DN79;P35520;P35520-2	Cystathionine beta-synthase	CBS	589
NaN	NaN	NaN	NaN	NaN	NaN	NaN	NaN	NaN	2	2	2	45	45	45	16.837	0	14.95	23120000	2	P0DP25;P0DP24;P0DP23	P0DP25;P0DP24;P0DP23			590
NaN	NaN	NaN	24.5089	23.7818	23.08	NaN	NaN	NaN	31	1	1	66	3.3	3.3	49.959	0	205.02	183200000	8	P0DPH8;P0DPH7;P0DPH7-2;Q6PEY2	P0DPH8;P0DPH7;P0DPH7-2;Q6PEY2	Tubulin alpha-3E chain	TUBA3E	591
NaN	NaN	NaN	NaN	NaN	NaN	NaN	NaN	18.2229	1	1	1	2.5	2.5	2.5	58.482	0.0014652	1.9957	1941400	1	P10155-3;P10155-5;P10155-4;P10155	P10155-3;P10155-5;P10155-4;P10155	60 kDa SS-A/Ro ribonucleoprotein	TROVE2	592
NaN	NaN	NaN	NaN	NaN	21.6426	NaN	NaN	20.9824	2	2	2	15.6	15.6	15.6	23.48	0	4.6332	37399000	4	P10301	P10301	Ras-related protein R-Ras	RRAS	593
25.4885	26.7046	25.5975	28.5151	28.0156	25.0587	26.0999	28.1601	27.5979	15	13	10	36.3	36.3	36.1	40.648	0	323.31	7082700000	131	P10321;P10321-2	P10321;P10321-2	HLA class I histocompatibility antigen, Cw-7 alpha chain	HLA-C	594
27.995	21.9253	NaN	25.6446	NaN	28.5546	29.0393	24.7939	25.4197	13	13	2	43.8	43.8	9.6	21.865	0	265.87	5666700000	145	P10412;Q02539;P22492	P10412	Histone H1.4	HIST1H1E	595
NaN	NaN	NaN	NaN	NaN	NaN	NaN	NaN	NaN	2	2	2	3.1	3.1	3.1	68.996	0	2.6498	10632000	2	P10515	P10515	Dihydrolipoyllysine-residue acetyltransferase component of pyruvate dehydrogenase complex, mitochondrial	DLAT	596
23.3813	24.1839	NaN	24.2177	23.7137	21.7303	NaN	NaN	NaN	10	10	8	9	9	7.4	211.68	0	25.883	166970000	21	P10586-2;P10586	P10586-2;P10586	Receptor-type tyrosine-protein phosphatase F	PTPRF	597
NaN	NaN	NaN	NaN	NaN	NaN	NaN	19.115	NaN	1	1	1	7.1	7.1	7.1	46.155	0	6.1042	8826000	1	P10589	P10589	COUP transcription factor 1	NR2F1	598
NaN	NaN	NaN	NaN	NaN	NaN	NaN	NaN	NaN	1	1	1	23.5	23.5	23.5	9.4519	0	4.0647	232680000	2	P10599-2;P10599	P10599-2;P10599	Thioredoxin	TXN	599
25.8122	26.1629	25.968	24.8158	25.5583	24.7954	25.5533	23.3153	23.5582	4	4	4	24	24	24	13.696	0	29.725	877840000	63	P10606	P10606	Cytochrome c oxidase subunit 5B, mitochondrial	COX5B	600
22.1878	22.652	NaN	22.9945	22.6285	22.0846	22.7214	23.4621	23.0678	4	4	4	36.8	36.8	36.8	9.9836	0	17.435	229440000	15	P10620-2;P10620	P10620-2;P10620	Microsomal glutathione S-transferase 1	MGST1	601
NaN	NaN	NaN	NaN	NaN	NaN	NaN	NaN	20.748	1	1	1	4.7	4.7	4.7	42.981	0	10.031	17711000	2	P10644	P10644	cAMP-dependent protein kinase type I-alpha regulatory subunit;cAMP-dependent protein kinase type I-alpha regulatory subunit, N-terminally processed	PRKAR1A	602
NaN	NaN	NaN	20.9175	NaN	NaN	21.6512	23.3148	NaN	3	3	3	12.7	12.7	12.7	28.652	0	9.179	90778000	7	P10646-2;P10646	P10646-2;P10646	Tissue factor pathway inhibitor	TFPI	603
NaN	NaN	NaN	NaN	NaN	NaN	21.2244	NaN	22.4018	4	4	4	28.4	28.4	28.4	31.462	0	11.72	53452000	5	P10768	P10768	S-formylglutathione hydrolase	ESD	604
26.1467	25.7378	26.2803	28.1629	27.0121	28.1083	26.4784	27.6245	28.37	40	40	40	66.5	66.5	66.5	61.054	0	323.31	7786800000	380	P10809;P10809-2	P10809	60 kDa heat shock protein, mitochondrial	HSPD1	605
27.3622	27.6082	26.7788	28.7084	28.0346	28.675	26.7248	27.3443	29.4385	44	44	43	54.9	54.9	54.9	72.332	0	323.31	12876000000	431	P11021	P11021	78 kDa glucose-regulated protein	HSPA5	606
22.923	22.2356	NaN	NaN	NaN	NaN	NaN	NaN	NaN	6	6	6	6.4	6.4	6.4	177.6	0	9.5759	63186000	10	P11047	P11047	Laminin subunit gamma-1	LAMC1	607
27.7507	28.3665	27.5558	28.3377	28.2378	27.8128	27.63	27.7216	29.3418	37	36	33	49.8	49.8	47.8	70.897	0	323.31	12505000000	474	P11142;P11142-2;P54652	P11142;P11142-2	Heat shock cognate 71 kDa protein	HSPA8	608
26.2156	26.5723	27.1287	29.9457	28.6583	26.5372	23.3629	26.9114	24.3882	11	11	11	16.5	16.5	16.5	54.083	0	323.31	6881400000	130	P11166	P11166	Solute carrier family 2, facilitated glucose transporter member 1	SLC2A1	609
22.0515	NaN	22.5903	22.8992	21.8893	NaN	22.4411	25.4324	23.3798	3	3	3	11.3	11.3	11.3	53.924	0	205.61	410230000	10	P11169;Q8TDB8-4;Q8TDB8-2;Q8TDB8;Q8TDB8-5	P11169;Q8TDB8-4;Q8TDB8-2;Q8TDB8;Q8TDB8-5	Solute carrier family 2, facilitated glucose transporter member 3;Solute carrier family 2, facilitated glucose transporter member 14	SLC2A3;SLC2A14	610
NaN	NaN	NaN	NaN	NaN	NaN	NaN	NaN	22.4212	3	3	3	24.8	24.8	24.8	33.051	0	10.893	68129000	3	P11172-2;P11172-3;P11172;P11172-4	P11172-2;P11172-3;P11172	Uridine 5-monophosphate synthase;Orotate phosphoribosyltransferase;Orotidine 5-phosphate decarboxylase	UMPS	611
22.116	22.6835	NaN	23.4462	NaN	22.0476	22.3551	23.1543	22.9725	5	5	5	18.5	18.5	18.5	37.514	0	79.934	264090000	17	P11177-3;P11177-2;P11177	P11177-3;P11177-2;P11177	Pyruvate dehydrogenase E1 component subunit beta, mitochondrial	PDHB	612
NaN	NaN	NaN	NaN	NaN	21.6675	NaN	NaN	NaN	2	2	2	5.4	5.4	5.4	53.486	0.0007719	2.3231	24580000	2	P11182	P11182	Lipoamide acyltransferase component of branched-chain alpha-keto acid dehydrogenase complex, mitochondrial	DBT	613
NaN	21.353	NaN	21.432	NaN	NaN	20.7906	21.158	21.755	3	3	3	7.1	7.1	7.1	96.695	0	5.3336	62685000	8	P11216	P11216	Glycogen phosphorylase, brain form	PYGB	614
22.1404	23.1666	23.5193	23.9115	24.1107	23.9944	23.0852	22.8029	23.0251	6	6	3	19.9	19.9	11.7	23.567	0	32.321	400330000	36	P11233	P11233	Ras-related protein Ral-A	RALA	615
NaN	NaN	NaN	NaN	NaN	20.8291	NaN	NaN	20.9188	5	2	2	16	8.7	8.7	23.408	0.00075557	2.157	32108000	3	P11234;P11234-3;P11234-2	P11234;P11234-3;P11234-2	Ras-related protein Ral-B	RALB	616
NaN	NaN	NaN	NaN	NaN	NaN	NaN	NaN	NaN	1	1	1	3	3	3	45.412	0.0096958	1.4181	456840000	11	P11309-2	P11309-2			617
NaN	NaN	NaN	NaN	NaN	NaN	NaN	23.3198	22.7044	4	4	4	7.6	7.6	7.6	95.343	0	34.628	117630000	4	P11362-21;P11362-5;P11362;P11362-19;P11362-2;P11362-7;P11362-20;P11362-3;P11362-14;P11362-4;P11362-6;P11362-8;P22607-3;P11362-9;P22455-2;P22607-4;P22455;P22607;P22607-2;P22455-3;P11362-10;P11362-11;P11362-12;P11362-13;P11362-16;P11362-18	P11362-21;P11362-5;P11362;P11362-19;P11362-2;P11362-7;P11362-20;P11362-3;P11362-14;P11362-4;P11362-6;P11362-8;P22607-3;P11362-9;P22455-2;P22607-4;P22455;P22607;P22607-2;P22455-3;P11362-10;P11362-11;P11362-12;P11362-13	Fibroblast growth factor receptor 1;Fibroblast growth factor receptor 3;Fibroblast growth factor receptor 4	FGFR1;FGFR3;FGFR4	618
NaN	NaN	NaN	NaN	NaN	23.9299	NaN	NaN	NaN	3	3	3	5	5	5	90.725	0	11.009	142280000	16	P11387;Q969P6-2;Q969P6	P11387	DNA topoisomerase 1	TOP1	619
22.4823	22.7587	NaN	22.507	22.2933	22.0749	22.475	23.2835	24.0188	6	6	6	14	14	14	59.256	0	170.49	305520000	14	P11413;P11413-3;P11413-2	P11413;P11413-3;P11413-2	Glucose-6-phosphate 1-dehydrogenase	G6PD	620
NaN	NaN	NaN	NaN	NaN	21.6352	NaN	22.9433	22.4762	7	7	7	9.5	9.5	9.5	129.63	0	14.082	145550000	10	P11498;P11498-2	P11498	Pyruvate carboxylase, mitochondrial	PC	621
23.7227	24.407	24.3561	25.1246	23.2669	23.994	24.2042	27.1553	27.2515	28	28	27	38.1	38.1	37	101.56	0	259.07	2225700000	78	P11586	P11586	C-1-tetrahydrofolate synthase, cytoplasmic;Methylenetetrahydrofolate dehydrogenase;Methenyltetrahydrofolate cyclohydrolase;Formyltetrahydrofolate synthetase;C-1-tetrahydrofolate synthase, cytoplasmic, N-terminally processed	MTHFD1	622
22.8523	23.3166	23.6586	24.4646	24.4707	22.7252	24.6044	25.713	26.1364	19	19	19	12.2	12.2	12.2	274.37	0	275.86	1131400000	74	P11717	P11717	Cation-independent mannose-6-phosphate receptor	IGF2R	623
NaN	NaN	NaN	NaN	NaN	NaN	NaN	22.9221	23.6152	4	4	2	18.7	18.7	10	35.054	0	11.999	143900000	8	P11908-2;P11908;P21108	P11908-2;P11908	Ribose-phosphate pyrophosphokinase 2	PRPS2	624
22.4532	23.6628	21.9829	21.626	21.8374	24.0719	22.5885	22.8423	23.1065	8	8	5	16.2	16.2	10.1	70.67	0	111.66	338450000	26	P11940;P11940-2;Q9H361;Q5JQF8	P11940;P11940-2	Polyadenylate-binding protein 1	PABPC1	625
NaN	22.5711	NaN	22.1964	22.3099	NaN	NaN	22.8005	22.959	3	3	3	14.9	14.9	14.9	28.768	0	10.226	152670000	8	P12004	P12004	Proliferating cell nuclear antigen	PCNA	626
NaN	NaN	NaN	NaN	NaN	NaN	NaN	24.1026	NaN	2	2	2	28.4	28.4	28.4	12.155	0	13.898	504420000	5	P12074	P12074	Cytochrome c oxidase subunit 6A1, mitochondrial	COX6A1	627
NaN	NaN	NaN	22.801	NaN	NaN	NaN	NaN	21.6061	5	5	5	15.8	15.8	15.8	50.156	0	10.656	53869000	7	P12081-3;P12081-2;P12081-4;P12081	P12081-3;P12081-2;P12081-4;P12081	Histidine--tRNA ligase, cytoplasmic	HARS	628
NaN	NaN	NaN	24.5637	25.204	25.7793	27.3274	25.8026	22.4119	15	15	15	17	17	17	108.53	0	323.31	1672900000	109	P12109	P12109	Collagen alpha-1(VI) chain	COL6A1	629
NaN	NaN	NaN	22.9665	23.5813	24.57	26.813	25.0816	NaN	13	13	13	14.7	14.7	14.7	108.58	0	59.533	924610000	39	P12110;P12110-3;P12110-2	P12110;P12110-3;P12110-2	Collagen alpha-2(VI) chain	COL6A2	630
NaN	NaN	NaN	26.0225	27.187	27.8688	29.682	28.2912	24.435	108	108	108	43.5	43.5	43.5	321.35	0	323.31	8139300000	541	P12111-2;P12111;P12111-4;P12111-5;P12111-3	P12111-2;P12111;P12111-4	Collagen alpha-3(VI) chain	COL6A3	631
NaN	NaN	NaN	NaN	NaN	NaN	NaN	NaN	19.5782	11	1	1	37.9	7.4	7.4	33.064	0	5.9082	19454000	3	P12235	P12235	ADP/ATP translocase 1	SLC25A4	632
24.2932	22.8096	26.331	28.2598	24.1615	26.6446	NaN	NaN	22.0676	23	13	9	58.7	39.6	25.2	32.866	0	323.31	2519700000	63	P12236	P12236	ADP/ATP translocase 3;ADP/ATP translocase 3, N-terminally processed	SLC25A6	633
23.1708	23.2275	22.3146	24.6273	22.2653	25.1058	23.9448	23.1882	22.8715	9	9	9	24.1	24.1	24.1	55.804	0	66.554	647320000	51	P12268	P12268	Inosine-5-monophosphate dehydrogenase 2	IMPDH2	634
24.0039	NaN	NaN	21.1799	NaN	25.5411	23.2179	NaN	21.7208	20	20	20	14.5	14.5	14.5	267.29	0	167.84	326320000	34	P12270;P12270-2	P12270	Nucleoprotein TPR	TPR	635
NaN	NaN	NaN	NaN	NaN	NaN	NaN	NaN	NaN	1	1	1	5.5	5.5	5.5	42.644	0.0035075	1.7439	6142100	1	P12277	P12277	Creatine kinase B-type	CKB	636
NaN	NaN	NaN	NaN	NaN	26.7934	NaN	NaN	NaN	14	14	14	54.9	54.9	54.9	47.036	0	238.82	748670000	25	P12532;P12532-2;P17540	P12532;P12532-2	Creatine kinase U-type, mitochondrial	CKMT1A	637
22.8242	23.6506	23.126	23.3127	21.7503	26.5394	21.7806	23.3957	24.4056	17	17	9	28.5	28.5	17.4	102.71	0	191.09	840300000	111	P12814-2;P12814;P12814-3;P12814-4	P12814-2;P12814;P12814-3;P12814-4	Alpha-actinin-1	ACTN1	638
NaN	NaN	NaN	NaN	NaN	NaN	NaN	NaN	21.6725	3	1	1	6.5	3	3	59.834	0	74.416	51592000	6	P12931;P12931-2	P12931;P12931-2	Proto-oncogene tyrosine-protein kinase Src	SRC	639
26.9276	24.1142	23.585	25.0881	23.4696	27.2723	25.172	22.5177	25.1808	28	28	28	43.8	43.8	43.8	69.842	0	202.73	2228200000	138	P12956;P12956-2	P12956;P12956-2	X-ray repair cross-complementing protein 6	XRCC6	640
26.6328	24.9727	23.6264	25.69	23.7311	26.7554	25.5737	22.9882	25.5045	19	19	19	34.6	34.6	34.6	82.704	0	94.375	1991400000	107	P13010	P13010	X-ray repair cross-complementing protein 5	XRCC5	641
23.1514	24.0877	24.5556	25.4897	24.198	24.4627	24.0939	24.078	25.2323	4	4	4	20.7	20.7	20.7	19.576	0	44.457	775690000	15	P13073	P13073	Cytochrome c oxidase subunit 4 isoform 1, mitochondrial	COX4I1	642
21.9804	21.7754	NaN	23.6263	23.5943	21.8104	22.7367	25.4679	25.8807	9	9	9	23.4	23.4	23.4	49.973	0	238.61	713790000	31	P13489	P13489	Ribonuclease inhibitor	RNH1	643
NaN	NaN	NaN	22.0064	23.6495	20.8676	NaN	21.6997	21.1298	4	4	4	5.1	5.1	5.1	80.311	0	7.6078	87943000	6	P13591-4;P13591-3;P13591-1;P13591;P13591-5;P13591-6	P13591-4;P13591-3;P13591-1;P13591;P13591-5	Neural cell adhesion molecule 1	NCAM1	644
23.7417	23.7867	NaN	24.2244	NaN	23.4419	23.6155	23.3273	NaN	8	8	8	6	6	6	182.06	0	82.179	229940000	21	P13611-3;P13611-5;P13611;P13611-4;P13611-2	P13611-3;P13611-5;P13611;P13611-4;P13611-2	Versican core protein	VCAN	645
NaN	NaN	NaN	NaN	NaN	NaN	NaN	21.5624	NaN	2	2	2	4	4	4	114.9	0	5.3122	33248000	3	P13612	P13612	Integrin alpha-4	ITGA4	646
NaN	23.4471	NaN	NaN	21.2757	NaN	NaN	NaN	NaN	24	2	2	20.9	3	3	111.75	0	14.055	54299000	16	P13637;P13637-2;P13637-3	P13637;P13637-2;P13637-3	Sodium/potassium-transporting ATPase subunit alpha-3	ATP1A3	647
27.2379	28.9628	27.6857	29.5677	28.8787	27.8914	27.8271	29.0036	29.8086	56	56	56	66	66	66	95.337	0	323.31	16023000000	554	P13639	P13639	Elongation factor 2	EEF2	648
NaN	NaN	NaN	NaN	NaN	22.5164	NaN	NaN	23.7106	5	5	5	11.2	11.2	11.2	72.932	0	11.128	126700000	10	P13667	P13667	Protein disulfide-isomerase A4	PDIA4	649
22.3474	21.8404	NaN	21.684	NaN	22.8575	21.3867	NaN	21.7489	3	3	3	9.7	9.7	9.7	58.957	0	17.94	112290000	7	P13674-3;P13674-2;P13674	P13674-3;P13674-2;P13674	Prolyl 4-hydroxylase subunit alpha-1	P4HA1	650
NaN	NaN	NaN	NaN	NaN	NaN	NaN	NaN	20.9611	1	1	1	5.8	5.8	5.8	36.598	0.0003962	2.5304	23738000	1	P13686	P13686	Tartrate-resistant acid phosphatase type 5	ACP5	651
NaN	NaN	NaN	NaN	NaN	NaN	NaN	NaN	21.4925	2	2	2	18.6	18.6	18.6	19.595	0	14.577	20602000	2	P13693	P13693	Translationally-controlled tumor protein	TPT1	652
25.5705	23.9874	26.3807	27.7356	26.8927	21.5221	NaN	22.1439	21.4163	4	4	4	18	18	18	33.067	0	323.31	1292600000	28	P13726;P13726-2	P13726;P13726-2	Tissue factor	F3	653
NaN	NaN	NaN	NaN	NaN	NaN	NaN	NaN	20.4444	3	1	1	12.3	4.7	4.7	40.057	0.0014695	2.0038	22228000	2	P13747	P13747	HLA class I histocompatibility antigen, alpha chain E	HLA-E	654
NaN	22.9094	NaN	22.6937	23.3772	23.5532	NaN	23.6984	25.3081	8	8	8	19.1	19.1	19.1	65.632	0	31.402	471510000	13	P13797-3;P13797-2;P13797;P13796	P13797-3;P13797-2;P13797	Plastin-3	PLS3	655
NaN	NaN	NaN	NaN	NaN	NaN	NaN	NaN	21.5491	2	2	2	3.8	3.8	3.8	81.224	0	5.5566	31461000	3	P13798	P13798	Acylamino-acid-releasing enzyme	APEH	656
NaN	NaN	NaN	NaN	NaN	20.3327	NaN	20.1275	NaN	2	2	2	17.6	17.6	17.6	30.025	0	4.0398	23115000	3	P13804-2;P13804	P13804-2;P13804	Electron transfer flavoprotein subunit alpha, mitochondrial	ETFA	657
NaN	NaN	NaN	NaN	NaN	NaN	NaN	NaN	NaN	1	1	1	2.2	2.2	2.2	76.482	0.003169	1.7729	24726000	2	P13807-2;P13807	P13807-2;P13807	Glycogen [starch] synthase, muscle	GYS1	658
21.98	NaN	NaN	22.4711	21.9471	21.8079	NaN	22.495	23.1119	9	9	9	33.2	33.2	33.2	45.518	0	38.971	187620000	13	P13861;P13861-2;P31323	P13861;P13861-2	cAMP-dependent protein kinase type II-alpha regulatory subunit	PRKAR2A	659
24.7063	26.3379	25.7348	25.6432	25.606	21.6678	24.086	28.2004	25.4227	6	6	6	28.1	28.1	28.1	14.177	0	323.31	2913300000	128	P13987;P13987-2	P13987;P13987-2	CD59 glycoprotein	CD59	660
21.8073	22.6919	NaN	24.6092	23.2717	23.0237	22.4307	22.4996	21.9909	7	7	7	50	50	50	26.849	0	16.784	254840000	13	P13995-2;P13995	P13995-2;P13995	Bifunctional methylenetetrahydrofolate dehydrogenase/cyclohydrolase, mitochondrial;NAD-dependent methylenetetrahydrofolate dehydrogenase;Methenyltetrahydrofolate cyclohydrolase	MTHFD2	661
24.2383	25.5959	26.5091	23.4496	24.0295	22.9156	22.9785	23.5262	24.0413	5	5	5	22.6	22.6	22.6	12.476	0	323.31	498350000	41	P14174	P14174	Macrophage migration inhibitory factor	MIF	662
27.4758	28.7709	27.5277	29.9188	28.7514	26.3559	26.9885	30.6318	27.088	7	7	7	50.8	50.8	50.8	18.848	0	323.31	19017000000	229	P14209;P14209-3;P14209-2	P14209;P14209-3	CD99 antigen	CD99	663
23.6367	23.6166	22.8003	25.1196	24.5575	24.9948	22.9489	21.5405	25.1422	8	8	8	14.1	14.1	14.1	59.177	0	305.77	726180000	54	P14314-2;P14314	P14314-2;P14314	Glucosidase 2 subunit beta	PRKCSH	664
NaN	NaN	NaN	NaN	NaN	NaN	NaN	20.174	NaN	2	2	2	9.6	9.6	9.6	40.532	0	2.6376	34285000	2	P14324-2;P14324	P14324-2;P14324	Farnesyl pyrophosphate synthase	FDPS	665
NaN	NaN	NaN	23.3473	NaN	NaN	NaN	22.5512	22.48	3	3	3	11.5	11.5	11.5	50.513	0	8.3272	122390000	7	P14384	P14384	Carboxypeptidase M	CPM	666
NaN	NaN	NaN	NaN	NaN	NaN	NaN	NaN	19.0229	1	1	1	27.7	27.7	27.7	9.3959	0.00076658	2.2679	20450000	1	P14406	P14406	Cytochrome c oxidase subunit 7A2, mitochondrial	COX7A2	667
21.9461	NaN	NaN	NaN	NaN	NaN	NaN	NaN	NaN	2	2	2	1.1	1.1	1.1	122.02	0	5.9914	9701400	3	P14543-2;P14543	P14543-2;P14543	Nidogen-1	NID1	668
23.6855	24.7066	NaN	24.0579	23.993	NaN	24.3781	21.7608	23.5221	8	8	8	27.7	27.7	27.7	36.573	0	33.197	309810000	46	P14550	P14550	Alcohol dehydrogenase [NADP(+)]	AKR1A1	669
28.2818	29.0739	28.2814	29.1376	27.9882	27.6794	27.6817	29.2977	30.0487	42	42	6	84.6	84.6	11.3	57.936	0	323.31	17998000000	466	P14618;P14618-3;P30613-2;P30613	P14618;P14618-3	Pyruvate kinase PKM	PKM	670
NaN	NaN	NaN	NaN	NaN	NaN	NaN	NaN	17.9987	37	1	1	74.8	1.5	1.5	58.061	0.0065091	1.5755	1661900	1	P14618-2	P14618-2	Pyruvate kinase PKM	PKM	671
25.5276	25.4399	25.5569	26.2707	24.3432	26.7706	23.8379	24.3776	27.0433	26	24	24	39.6	37.9	37.9	92.468	0	323.31	2165800000	110	P14625;Q58FF3	P14625	Endoplasmin	HSP90B1	672
NaN	NaN	NaN	21.5108	21.8228	NaN	NaN	21.2708	NaN	2	2	2	8.6	8.6	8.6	44.102	0	2.7966	45144000	3	P14635-2;P14635	P14635-2;P14635	G2/mitotic-specific cyclin-B1	CCNB1	673
NaN	NaN	NaN	NaN	NaN	NaN	NaN	NaN	NaN	5	2	2	24.5	19.2	19.2	22.764	0	6.9663	64984000	5	P14649	P14649	Myosin light chain 6B	MYL6B	674
NaN	NaN	NaN	NaN	NaN	NaN	NaN	NaN	NaN	1	1	1	6.1	6.1	6.1	23.656	0	4.2254	48782000	4	P14678-2;P14678;P14678-3	P14678-2;P14678;P14678-3	Small nuclear ribonucleoprotein-associated proteins B and B	SNRPB	675
25.4308	25.798	25.1981	25.653	25.9897	25.7535	26.3618	22.288	27.1024	7	7	7	89.5	89.5	89.5	10.192	0	305.13	1830700000	101	P14854	P14854	Cytochrome c oxidase subunit 6B1	COX6B1	676
26.7665	22.3072	23.8779	24.8822	21.6739	28.4615	27.5383	25.0381	26.6935	25	25	25	62.5	62.5	62.5	64.132	0	323.31	4342100000	165	P14866;P14866-2	P14866;P14866-2	Heterogeneous nuclear ribonucleoprotein L	HNRNPL	677
21.4989	21.8462	NaN	21.4953	21.563	22.0525	21.7915	22.8374	22.1756	3	3	3	7.8	7.8	7.8	57.136	0	9.0149	138270000	7	P14868;P14868-2	P14868	Aspartate--tRNA ligase, cytoplasmic	DARS	678
24.4553	23.8651	23.9111	NaN	NaN	NaN	NaN	NaN	NaN	9	8	8	14.9	13.6	13.6	81.744	0	58.013	180640000	21	P14923	P14923	Junction plakoglobin	JUP	679
NaN	NaN	NaN	22.1246	22.0513	21.5986	NaN	NaN	NaN	2	2	2	28.8	28.8	28.8	13.53	0	6.5874	54432000	4	P14927;P14927-2	P14927;P14927-2	Cytochrome b-c1 complex subunit 7	UQCRB	680
NaN	NaN	NaN	NaN	NaN	NaN	NaN	NaN	NaN	1	1	1	6.8	6.8	6.8	14.719	0	3.5847	16592000	3	P15090	P15090	Fatty acid-binding protein, adipocyte	FABP4	681
21.914	21.8064	NaN	22.6295	22.0281	21.7631	26.5022	23.2455	23.866	4	4	4	15.5	15.5	15.5	35.853	0	30.769	460570000	11	P15121	P15121	Aldose reductase	AKR1B1	682
23.244	25.3103	24.5811	28.3541	26.9808	23.7636	NaN	NaN	NaN	31	31	31	39.9	39.9	39.9	109.54	0	323.31	1723300000	93	P15144	P15144	Aminopeptidase N	ANPEP	683
22.6498	25.1642	25.0942	25.9777	26.2331	22.7699	22.0116	26.0858	24.779	5	5	5	17.6	17.6	17.6	39.304	0	144.82	1204000000	35	P15151-3;P15151-2;P15151-4;P15151	P15151-3;P15151-2;P15151-4;P15151	Poliovirus receptor	PVR	684
21.447	22.3522	NaN	25.5685	24.4553	23.9137	25.157	27.6523	26.9365	11	11	9	38	38	38	21.429	0	323.31	2554300000	69	P15153	P15153	Ras-related C3 botulinum toxin substrate 2	RAC2	685
22.7968	22.8658	NaN	25.5879	NaN	22.2231	23.8459	23.8887	24.9576	9	9	9	26.4	26.4	26.4	68.6	0	35.548	596620000	22	P15170-2;P15170-3;P15170;Q8IYD1	P15170-2;P15170-3;P15170	Eukaryotic peptide chain release factor GTP-binding subunit ERF3A	GSPT1	686
25.1504	26.5889	25.9432	22.6402	24.455	23.2079	23.7861	23.6077	24.6247	12	12	8	21.2	21.2	16.4	69.412	0	31.078	672130000	53	P15311;P35241;P35241-5;P35241-4	P15311	Ezrin	EZR	687
NaN	NaN	NaN	NaN	NaN	NaN	NaN	NaN	NaN	1	1	1	11.5	11.5	11.5	31.095	0	2.6224	28519000	1	P15408-3;P15408-2;P15408	P15408-3;P15408-2;P15408	Fos-related antigen 2	FOSL2	688
NaN	23.7972	22.497	21.4956	23.7879	22.1153	NaN	23.8222	23.6981	3	3	3	25	25	25	17.298	0	27.137	312680000	25	P22392;P15531;P15531-2;P22392-2;O60361	P22392;P15531;P15531-2;P22392-2;O60361	Nucleoside diphosphate kinase B;Nucleoside diphosphate kinase A;Putative nucleoside diphosphate kinase	NME2;NME1;NME2P1	689
NaN	NaN	NaN	25.3358	NaN	NaN	22.4606	21.5709	22.4131	6	6	6	22.9	22.9	22.9	26.365	0	67.592	251010000	10	P15559-3;P15559-2;P15559	P15559-3;P15559-2;P15559	NAD(P)H dehydrogenase [quinone] 1	NQO1	690
23.6948	22.6089	21.8168	22.6881	22.0573	23.9344	23.2931	21.7126	22.4424	8	8	8	27.6	27.6	27.6	31.324	0	23.231	414180000	36	P15880	P15880	40S ribosomal protein S2	RPS2	691
NaN	NaN	NaN	NaN	NaN	NaN	NaN	NaN	NaN	11	11	11	7.1	7.1	7.1	260.12	0	26.145	90432000	16	P15924-2;P15924-3;P15924	P15924-2;P15924-3;P15924	Desmoplakin	DSP	692
NaN	NaN	NaN	NaN	NaN	NaN	NaN	NaN	NaN	1	1	1	8.9	8.9	8.9	29.247	0	4.3959	48217000	1	P15927;P15927-2;P15927-3	P15927;P15927-2;P15927-3	Replication protein A 32 kDa subunit	RPA2	693
29.457	29.6417	29.3284	31.8517	30.6625	26.6392	29.2784	31.7407	30.3442	14	14	14	18.5	18.5	18.5	81.537	0	323.31	55195000000	658	P16070;P16070-16;P16070-5;P16070-7;P16070-3;P16070-4;P16070-6;P16070-17;P16070-8;P16070-10;P16070-11;P16070-13;P16070-14;P16070-12;P16070-18;P16070-15;P16070-9;P16070-19	P16070;P16070-16;P16070-5;P16070-7;P16070-3;P16070-4;P16070-6;P16070-17;P16070-8;P16070-10;P16070-11;P16070-13;P16070-14;P16070-12;P16070-18;P16070-15;P16070-9	CD44 antigen	CD44	694
25.3809	26.1792	24.8902	25.4862	25.2105	20.7599	26.5785	23.7001	24.3042	14	14	12	58.5	58.5	53.8	30.375	0	323.31	771460000	77	P16152;P16152-2	P16152;P16152-2	Carbonyl reductase [NADPH] 1	CBR1	695
26.6938	22.8796	20.8817	24.453	NaN	27.1236	27.38	23.9134	24.5015	12	7	7	35.8	22.6	22.6	22.58	0	323.31	2445000000	104	P16401	P16401	Histone H1.5	HIST1H1B	696
NaN	NaN	NaN	NaN	NaN	NaN	25.2697	NaN	NaN	13	2	2	43.4	9.5	9.5	22.35	0	40.901	289960000	20	P16402	P16402	Histone H1.3	HIST1H1D	697
NaN	NaN	NaN	NaN	NaN	24.7227	NaN	NaN	NaN	13	2	2	45.1	9.9	9.9	21.364	0	17.044	655000000	15	P16403	P16403	Histone H1.2	HIST1H1C	698
NaN	NaN	NaN	21.8817	NaN	NaN	NaN	NaN	22.3958	4	4	4	9.7	9.7	9.7	76.689	0	4.1039	57344000	4	P16435	P16435	NADPH--cytochrome P450 reductase	POR	699
25.5719	26.669	26.5816	27.5491	26.6292	25.8105	26.0142	27.2605	27.2228	26	26	26	28.9	28.9	28.9	114.76	0	262.72	3533300000	179	P16615;P16615-5;P16615-2;P16615-3;P16615-4;O14983-3;O14983-2;O14983;Q93084-4;Q93084-2;Q93084-3;Q93084-7;Q93084;Q93084-6;Q93084-5	P16615;P16615-5;P16615-2;P16615-3;P16615-4	Sarcoplasmic/endoplasmic reticulum calcium ATPase 2	ATP2A2	700
26.435	26.1415	26.4585	24.5725	24.4846	21.6395	26.2209	22.3179	24.9502	6	6	6	38.3	38.3	38.3	17.302	0	233.92	1032000000	59	P16949;P16949-2;Q93045;Q93045-2	P16949;P16949-2	Stathmin	STMN1	701
NaN	NaN	NaN	NaN	NaN	NaN	NaN	NaN	20.4576	4	1	1	8.2	3.7	3.7	71.027	0	12.775	9137400	1	P17066;P48741	P17066;P48741	Heat shock 70 kDa protein 6;Putative heat shock 70 kDa protein 7	HSPA6;HSPA7	702
26.1764	25.064	26.4091	NaN	NaN	NaN	26.2661	24.2398	25.8932	2	2	2	41.1	41.1	41.1	11.676	0	152.24	2220200000	55	P17096;P17096-2;P17096-3	P17096;P17096-2;P17096-3	High mobility group protein HMG-I/HMG-Y	HMGA1	703
NaN	22.0777	NaN	NaN	NaN	NaN	NaN	NaN	NaN	2	2	2	11.2	11.2	11.2	44.147	0	2.867	66984000	2	P17174-2;P17174	P17174-2;P17174	Aspartate aminotransferase, cytoplasmic	GOT1	704
22.8474	20.769	21.2109	24.8575	22.7628	21.7011	24.5719	25.4606	24.8076	9	9	9	17.4	17.4	17.4	76.749	0	148.31	649870000	39	P17252	P17252	Protein kinase C alpha type	PRKCA	705
24.4228	23.2772	23.9989	25.4197	22.9832	NaN	26.267	27.9037	28.5455	25	25	25	26	26	26	129.29	0	323.31	4588600000	165	P17301	P17301	Integrin alpha-2	ITGA2	706
23.4312	23.2623	NaN	24.9919	24.0896	24.0999	24.0002	26.7427	24.6347	7	7	7	20.7	20.7	20.7	43.008	0	323.31	1287100000	49	P17302	P17302	Gap junction alpha-1 protein	GJA1	707
NaN	21.3788	NaN	NaN	NaN	NaN	NaN	NaN	NaN	2	2	2	4.3	4.3	4.3	59.766	0	3.9194	6724200	2	P17342-2;P17342	P17342-2;P17342	Atrial natriuretic peptide receptor 3	NPR3	708
22.6741	NaN	21.7501	NaN	22.1708	23.6717	22.2621	NaN	NaN	7	7	7	12.9	12.9	12.9	84.936	0	12.872	158260000	11	P17480-2;P17480	P17480-2;P17480	Nucleolar transcription factor 1	UBTF	709
NaN	NaN	NaN	NaN	NaN	NaN	NaN	NaN	NaN	1	1	1	4	4	4	40.589	0	2.6635	32897000	1	P17612	P17612	cAMP-dependent protein kinase catalytic subunit alpha	PRKACA	710
23.3935	22.8763	NaN	23.2417	21.0827	NaN	24.283	24.278	26.2394	17	17	17	30.6	30.6	30.6	79.994	0	132.16	709180000	41	P17655;P17655-2	P17655;P17655-2	Calpain-2 catalytic subunit	CAPN2	711
21.4733	21.9554	NaN	22.6895	21.802	21.4097	21.4452	21.9704	22.56	2	2	2	9.6	9.6	9.6	40.99	0	9.4051	133430000	7	P17706-3;P17706-2;P17706-4;P17706	P17706-3;P17706-2;P17706-4;P17706	Tyrosine-protein phosphatase non-receptor type 2	PTPN2	712
21.4437	22.1257	NaN	23.3163	NaN	20.6183	21.869	22.8219	23.2496	6	6	6	14.4	14.4	14.4	66.69	0	25.345	201370000	21	P17812;P17812-2	P17812;P17812-2	CTP synthase 1	CTPS1	713
NaN	NaN	NaN	23.5229	22.2428	21.1819	NaN	23.5815	NaN	4	4	4	12.2	12.2	12.2	67.541	0	27.255	179600000	16	P17813-2;P17813	P17813-2;P17813	Endoglin	ENG	714
24.8641	23.9691	23.9757	23.864	24.414	25.8037	25.3682	23.9662	24.2376	23	17	17	39.4	30	30	69.147	0	159.86	1078300000	80	P17844;P17844-2	P17844;P17844-2	Probable ATP-dependent RNA helicase DDX5	DDX5	715
24.1225	23.2669	23.3391	25.0409	22.8037	23.2028	24.2677	25.7553	24.2598	7	5	5	14.2	10.6	10.6	85.018	0	133.11	797340000	39	P17858;P17858-2	P17858;P17858-2	ATP-dependent 6-phosphofructokinase, liver type	PFKL	716
21.757	23.9342	NaN	21.5285	22.2493	22.5769	22.752	25.2458	23.1216	6	6	6	24.4	24.4	24.4	26.152	0	72.852	467360000	20	P17931	P17931	Galectin-3	LGALS3	717
22.7636	22.1669	NaN	23.3948	NaN	22.3946	22.6737	22.4465	22.6863	7	7	7	22.3	22.3	22.3	49.203	0	10.362	254940000	13	P17980	P17980	26S protease regulatory subunit 6A	PSMC3	718
24.0033	23.6689	NaN	24.8871	22.1281	22.9382	23.7245	23.7347	24.6279	12	12	12	26.6	26.6	26.6	60.343	0	112.93	538980000	49	P17987	P17987	T-complex protein 1 subunit alpha	TCP1	719
NaN	NaN	NaN	22.5325	22.685	NaN	NaN	22.6662	22.4434	4	4	4	13.6	13.6	13.6	49.966	0	41.098	146740000	5	P18031	P18031	Tyrosine-protein phosphatase non-receptor type 1	PTPN1	720
23.9391	22.0936	NaN	NaN	NaN	24.7947	24.2629	21.8595	21.4127	2	2	2	9.1	9.1	9.1	12.538	0	6.4364	446360000	35	P18077	P18077	60S ribosomal protein L35a	RPL35A	721
24.3208	25.2406	24.6648	28.0754	27.4761	25.1277	NaN	25.3329	22.9061	23	23	23	30.7	30.7	30.7	88.053	0	323.31	2194300000	105	P18084	P18084	Integrin beta-5	ITGB5	722
25.4808	23.0596	23.0773	22.9008	22.5767	26.5785	25.7309	22.4403	22.6586	13	13	13	46.4	46.4	46.4	29.225	0	226.87	1479100000	94	P18124	P18124	60S ribosomal protein L7	RPL7	723
NaN	NaN	NaN	NaN	NaN	NaN	NaN	NaN	21.4328	1	1	1	1.5	1.5	1.5	116.72	0	4.5007	61876000	4	P18206-2;P18206	P18206-2;P18206	Vinculin	VCL	724
NaN	NaN	NaN	NaN	NaN	NaN	NaN	NaN	20.7042	1	1	1	1.4	1.4	1.4	89.702	0	9.231	31830000	1	P18433-6;P18433	P18433-6;P18433	Receptor-type tyrosine-protein phosphatase alpha	PTPRA	725
NaN	NaN	NaN	NaN	NaN	NaN	NaN	NaN	NaN	1	1	1	1.3	1.3	1.3	74.957	0	3.9586	1510300000	28	P18564-2;P18564	P18564-2;P18564	Integrin beta-6	ITGB6	726
23.3696	NaN	NaN	21.2803	NaN	24.6331	24.8147	21.0513	21.5246	12	12	12	9.7	9.7	9.7	259.59	0	98.486	360190000	34	P18583-7;P18583;P18583-5;P18583-9;P18583-10;P18583-3;P18583-4;P18583-6;P18583-2;P18583-8	P18583-7;P18583;P18583-5;P18583-9;P18583-10;P18583-3;P18583-4;P18583-6;P18583-2	Protein SON	SON	727
24.95	23.3628	23.167	22.4398	21.6706	25.983	25.143	23.3124	21.8554	7	7	7	28.5	28.5	28.5	26.372	0	56.86	1003200000	48	P18621-3;P18621;P18621-2	P18621-3;P18621	60S ribosomal protein L17	RPL17	728
26.9567	27.489	26.732	27.8189	25.5167	24.7636	27.5322	26.3012	28.3993	20	20	20	65.7	65.7	65.7	28.804	0	323.31	4564700000	180	P18669;Q8N0Y7;P15259	P18669;Q8N0Y7	Phosphoglycerate mutase 1;Probable phosphoglycerate mutase 4	PGAM1;PGAM4	729
24.0394	22.9383	NaN	23.877	23.2611	26.0792	25.2032	22.3912	24.1339	12	12	12	57	57	57	44.969	0	252.28	916240000	46	P18754;P18754-2	P18754;P18754-2	Regulator of chromosome condensation	RCC1	730
23.8349	24.139	23.9286	24.0206	23.8748	24.6121	24.2807	22.9024	NaN	4	4	4	45.4	45.4	45.4	12.587	0	206.44	637300000	32	P18859;P18859-2	P18859;P18859-2	ATP synthase-coupling factor 6, mitochondrial	ATP5J	731
NaN	NaN	NaN	NaN	NaN	21.935	NaN	NaN	NaN	1	1	1	1.7	1.7	1.7	96.257	0.0031768	1.7916	20413000	1	P19021-2;P19021-4;P19021-3;P19021-6;P19021;P19021-5	P19021-2;P19021-4;P19021-3;P19021-6;P19021;P19021-5	Peptidyl-glycine alpha-amidating monooxygenase;Peptidylglycine alpha-hydroxylating monooxygenase;Peptidyl-alpha-hydroxyglycine alpha-amidating lyase	PAM	732
25.9327	24.7348	24.7415	26.0228	24.8385	NaN	23.3462	25.0097	24.6396	8	8	8	12	12	12	97.039	0	81.768	903310000	50	P19022-2;P19022	P19022-2;P19022	Cadherin-2	CDH2	733
NaN	NaN	NaN	NaN	NaN	NaN	NaN	NaN	21.733	3	3	3	3	3	3	148.53	0	14.234	34410000	3	P19174;P19174-2	P19174;P19174-2	1-phosphatidylinositol 4,5-bisphosphate phosphodiesterase gamma-1	PLCG1	734
NaN	21.3422	NaN	22.9628	22.8256	NaN	NaN	22.4433	NaN	3	3	3	5.9	5.9	5.9	26.66	0	12.671	105400000	15	P19256-2;P19256-3;P19256	P19256-2;P19256-3;P19256	Lymphocyte function-associated antigen 3	CD58	735
NaN	NaN	NaN	25.2849	25.6311	25.2266	NaN	NaN	NaN	14	14	14	29.6	29.6	29.6	81.275	0	135.95	520010000	37	P19320;P19320-2;P19320-3	P19320;P19320-2;P19320-3	Vascular cell adhesion protein 1	VCAM1	736
22.8993	22.3297	21.8784	NaN	21.5019	24.7074	23.6623	NaN	22.2379	12	12	12	21.3	21.3	21.3	76.613	0	92	483770000	41	P19338	P19338	Nucleolin	NCL	737
23.5643	23.5765	24.1204	25.0766	24.141	24.4757	23.9332	25.0759	27.6093	28	28	26	30.1	30.1	28	102.48	0	322.61	1932600000	89	P19367;P19367-4;P19367-2;P19367-3;Q2TB90;Q2TB90-3;Q2TB90-2	P19367;P19367-4;P19367-2;P19367-3	Hexokinase-1	HK1	738
NaN	NaN	NaN	NaN	NaN	20.9193	NaN	NaN	NaN	2	2	2	16.4	16.4	16.4	31.441	0	3.8141	22011000	2	P19387	P19387	DNA-directed RNA polymerase II subunit RPB3	POLR2C	739
23.183	23.2056	22.953	22.6387	22.6513	22.7886	22.8186	22.6004	22.4871	6	6	6	35.7	35.7	35.7	27.391	0	33.09	272320000	19	P19404	P19404	NADH dehydrogenase [ubiquinone] flavoprotein 2, mitochondrial	NDUFV2	740
NaN	NaN	NaN	NaN	NaN	NaN	NaN	20.3155	NaN	1	1	1	13	13	13	24.794	0.00078833	2.4996	9448000	3	P19438-3;P19438-2;P19438	P19438-3;P19438-2;P19438	Tumor necrosis factor receptor superfamily member 1A;Tumor necrosis factor receptor superfamily member 1A, membrane form;Tumor necrosis factor-binding protein 1	TNFRSF1A	741
NaN	NaN	NaN	NaN	NaN	NaN	NaN	NaN	NaN	2	2	2	5.7	5.7	5.7	57.39	0.00075245	2.1266	6301500	2	P19525-2;P19525	P19525-2;P19525	Interferon-induced, double-stranded RNA-activated protein kinase	EIF2AK2	742
NaN	NaN	NaN	NaN	NaN	NaN	NaN	NaN	22.588	3	3	3	7.9	7.9	7.9	33.824	0	6.8745	96807000	2	P19623	P19623	Spermidine synthase	SRM	743
23.928	23.5412	22.8	25.7689	24.1169	22.1165	NaN	23.1963	22.6732	6	6	6	15.6	15.6	15.6	90.762	0	24.345	417210000	17	P19634	P19634	Sodium/hydrogen exchanger 1	SLC9A1	744
23.8504	24.9014	24.5791	24.6891	24.4578	23.9292	23.5262	24.693	25.054	14	14	12	16.2	16.2	13.6	138.75	0	102.8	765310000	48	P20020-1;P20020-4;P20020;P20020-6;P20020-5;P20020-2;Q01814;Q01814-5;Q01814-8;Q01814-6;Q01814-2;Q16720;Q16720-4;Q16720-8;Q16720-7;Q16720-2;Q01814-7;Q16720-5;Q16720-3;Q01814-4;Q16720-6;Q01814-3	P20020-1;P20020-4;P20020;P20020-6;P20020-5;P20020-2	Plasma membrane calcium-transporting ATPase 1	ATP2B1	745
NaN	NaN	NaN	NaN	NaN	NaN	NaN	22.3636	NaN	3	3	3	13.8	13.8	13.8	29.38	0	5.8642	34093000	3	P20036	P20036	HLA class II histocompatibility antigen, DP alpha 1 chain	HLA-DPA1	746
22.6337	21.3408	NaN	22.1049	21.8817	24.2093	22.4976	NaN	21.6387	7	7	7	18	18	18	38.388	0	14.484	211820000	33	P20042	P20042	Eukaryotic translation initiation factor 2 subunit 2	EIF2S2	747
22.5632	23.0578	NaN	22.6911	22.7264	NaN	22.4422	22.5403	23.1625	4	4	4	15.9	15.9	15.9	50.315	0	13.358	157570000	13	P20073-2;P20073	P20073-2;P20073	Annexin A7	ANXA7	748
NaN	NaN	NaN	NaN	NaN	NaN	NaN	20.8198	NaN	1	1	1	6.5	6.5	6.5	33.889	0	6.8116	44243000	4	P20138-2;P20138	P20138-2;P20138	Myeloid cell surface antigen CD33	CD33	749
NaN	NaN	NaN	NaN	NaN	NaN	NaN	22.5272	22.4216	2	2	2	13.2	13.2	13.2	48.291	0	9.5506	75272000	4	P20333	P20333	Tumor necrosis factor receptor superfamily member 1B;Tumor necrosis factor receptor superfamily member 1b, membrane form;Tumor necrosis factor-binding protein 2	TNFRSF1B	750
NaN	NaN	NaN	NaN	NaN	NaN	NaN	NaN	20.3329	1	1	1	11	11	11	24.758	0.00078493	2.4659	18203000	2	P20337	P20337	Ras-related protein Rab-3B	RAB3B	751
21.866	22.3113	22.9505	22.765	22.3078	22.6942	22.2849	22.8435	23.889	3	2	2	22.4	17.4	17.4	22.178	0	27.921	251330000	9	P20339-2;P20339	P20339-2;P20339	Ras-related protein Rab-5A	RAB5A	752
NaN	22.6765	22.3262	21.4902	22.4186	21.538	21.9831	NaN	22.2164	3	3	3	15.4	15.4	15.4	19.934	0	7.2703	123690000	19	P20340-4;P20340-2;P20340;Q9NRW1-2;Q9NRW1;Q14964;P20340-3	P20340-4;P20340-2;P20340;Q9NRW1-2;Q9NRW1;Q14964	Ras-related protein Rab-6A;Ras-related protein Rab-6B;Ras-related protein Rab-39A	RAB6A;RAB6B;RAB39A	753
NaN	21.5773	NaN	22.9314	NaN	NaN	21.6578	NaN	21.9146	2	2	2	14.5	14.5	14.5	26.489	0	9.7464	100610000	5	P20618	P20618	Proteasome subunit beta type-1	PSMB1	754
23.7784	24.0945	24.004	26.816	24.8415	22.85	24.6288	27.2419	25.0224	5	5	5	18.8	18.8	18.8	30.993	0	33.395	1759000000	17	P20645	P20645	Cation-dependent mannose-6-phosphate receptor	M6PR	755
NaN	NaN	NaN	NaN	NaN	19.7585	NaN	NaN	NaN	14	1	0	75.4	26.9	0	14.107	0	29.955	4515600	2	P20671	P20671	Histone H2A type 1-D	HIST1H2AD	756
23.3578	24.9655	25.2439	25.0198	25.1484	23.9869	24.1399	24.0055	25.1856	6	6	6	28	28	28	16.762	0	50.289	931020000	52	P20674	P20674	Cytochrome c oxidase subunit 5A, mitochondrial	COX5A	757
27.14	27.1243	27.2728	26.4057	26.8498	29.928	27.0729	25.7572	25.9585	37	37	35	60.2	60.2	57.2	66.408	0	323.31	9789000000	312	P20700	P20700	Lamin-B1	LMNB1	758
22.1551	NaN	NaN	NaN	NaN	NaN	23.1647	22.0266	NaN	1	1	1	3.7	3.7	3.7	63.665	0.00076075	2.1945	92742000	4	P20810-3;P20810-4;P20810-8;P20810-2;P20810;P20810-9;P20810-5;P20810-10;P20810-7;P20810-6	P20810-3;P20810-4;P20810-8;P20810-2;P20810;P20810-9;P20810-5;P20810-10;P20810-7;P20810-6	Calpastatin	CAST	759
NaN	NaN	NaN	NaN	NaN	NaN	NaN	NaN	NaN	1	1	1	4.3	4.3	4.3	52.597	0	5.0471	6463300	1	P20839-2;P20839-4;P20839;P20839-3;P20839-7;P20839-5;P20839-6	P20839-2;P20839-4;P20839;P20839-3;P20839-7;P20839-5;P20839-6	Inosine-5-monophosphate dehydrogenase 1	IMPDH1	760
20.9815	21.3244	NaN	20.7182	21.1243	26.4135	NaN	NaN	NaN	12	12	12	11.9	11.9	11.9	183.56	0	323.31	540250000	35	P20908;P20908-2	P20908;P20908-2	Collagen alpha-1(V) chain	COL5A1	761
NaN	NaN	NaN	NaN	NaN	19.5861	NaN	NaN	NaN	1	1	1	13.2	13.2	13.2	18.11	0.0084232	1.4804	13868000	2	Q9UQ88-8;Q9UQ88-4;Q9UQ88;P21127-2;P21127-3;Q9UQ88-2;Q9UQ88-3;P21127-8;P21127-9;Q9UQ88-5;P21127-6;P21127-10;P21127-5;P21127-4;Q9UQ88-10;P21127-12;P21127	Q9UQ88-8;Q9UQ88-4;Q9UQ88;P21127-2;P21127-3;Q9UQ88-2;Q9UQ88-3;P21127-8;P21127-9;Q9UQ88-5;P21127-6;P21127-10;P21127-5;P21127-4;Q9UQ88-10;P21127-12;P21127	Cyclin-dependent kinase 11A;Cyclin-dependent kinase 11B	CDK11A;CDK11B	762
NaN	NaN	NaN	22.8777	NaN	22.3415	22.2384	NaN	22.5175	6	6	6	21.1	21.1	21.1	56.5	0	13.182	149460000	9	P21281;P15313	P21281	V-type proton ATPase subunit B, brain isoform	ATP6V1B2	763
25.3623	26.2914	25.0957	26.1994	26.6679	27.2237	25.0941	26.0027	26.3131	41	41	39	24	24	23.2	280.01	0	323.31	3351400000	195	P21333-2;P21333	P21333-2;P21333	Filamin-A	FLNA	764
22.1112	22.4052	NaN	NaN	NaN	NaN	NaN	NaN	NaN	2	2	2	5.3	5.3	5.3	44.847	0.000777	2.3804	38603000	3	P21397-2;P21397	P21397-2;P21397	Amine oxidase [flavin-containing] A	MAOA	765
NaN	NaN	NaN	NaN	NaN	NaN	NaN	NaN	17.8898	1	1	1	3.1	3.1	3.1	38.445	0.0018103	1.9252	19236000	1	P21462	P21462	fMet-Leu-Phe receptor	FPR1	766
NaN	NaN	NaN	21.5918	NaN	NaN	NaN	NaN	NaN	2	2	2	15.1	15.1	15.1	26.667	0	3.4494	18551000	2	P21583-3;P21583-2;P21583	P21583-3;P21583-2;P21583	Kit ligand;Soluble KIT ligand	KITLG	767
20.9234	22.8122	23.2152	25.3495	23.8594	19.9998	26.734	30.2134	28.9714	37	37	37	55.2	55.2	55.2	63.367	0	323.31	11816000000	248	P21589;P21589-2	P21589;P21589-2	5-nucleotidase	NT5E	768
NaN	NaN	NaN	NaN	NaN	NaN	NaN	NaN	20.4745	1	1	1	3.2	3.2	3.2	37.431	0	104.76	9245100	2	P21731	P21731	Thromboxane A2 receptor	TBXA2R	769
NaN	24.2467	24.8514	24.6389	25.2381	24.8921	23.8095	23.9626	24.0491	8	8	8	32.9	32.9	32.9	30.772	0	22.042	810980000	37	P21796	P21796	Voltage-dependent anion-selective channel protein 1	VDAC1	770
NaN	NaN	21.8848	22.1935	22.4637	23.1736	NaN	22.062	21.7596	4	4	4	17.9	17.9	17.9	31.629	0	40.125	143320000	4	P21912	P21912	Succinate dehydrogenase [ubiquinone] iron-sulfur subunit, mitochondrial	SDHB	771
22.4903	22.9523	22.1832	22.3365	20.8014	NaN	22.4539	26.2722	24.5502	2	2	2	4.4	4.4	4.4	25.416	0	256.34	1086000000	30	P21926	P21926	CD9 antigen	CD9	772
21.3845	21.3012	NaN	24.7746	NaN	23.0959	22.1269	23.6797	24.0493	9	9	9	57.9	57.9	57.9	24.449	0	111.21	464110000	30	P21964-2;P21964	P21964-2;P21964	Catechol O-methyltransferase	COMT	773
23.7349	25.8085	23.8522	NaN	NaN	22.9219	23.4242	NaN	NaN	9	9	9	17.8	17.8	17.8	77.328	0	33.103	246640000	30	P21980;P21980-2;P21980-3	P21980;P21980-2	Protein-glutamine gamma-glutamyltransferase 2	TGM2	774
NaN	24.7357	24.9247	24.7664	24.7926	23.692	23.6596	25.6841	26.6648	5	5	5	45.4	45.4	45.4	24.636	0	129.81	1431200000	35	P22061;P22061-2	P22061;P22061-2	Protein-L-isoaspartate(D-aspartate) O-methyltransferase	PCMT1	775
27.2852	NaN	NaN	25.3701	20.7678	28.2973	27.7735	22.7054	25.4146	14	14	13	51.4	51.4	48	33.784	0	323.31	4559400000	226	P22087	P22087	rRNA 2-O-methyltransferase fibrillarin	FBL	776
22.5325	23.3419	22.972	24.743	24.4045	23.1012	23.2912	23.6074	25.0498	16	16	16	26.1	26.1	26.1	107.77	0	39.743	598450000	33	P22102;P22102-2	P22102;P22102-2	Trifunctional purine biosynthetic protein adenosine-3;Phosphoribosylamine--glycine ligase;Phosphoribosylformylglycinamidine cyclo-ligase;Phosphoribosylglycinamide formyltransferase	GART	777
22.9239	23.743	22.6034	24.6954	22.6379	22.4476	24.2093	25.2761	25.8793	9	9	9	21.6	21.6	21.6	47.079	0	211.47	801330000	39	P22234;P22234-2	P22234;P22234-2	Multifunctional protein ADE2;Phosphoribosylaminoimidazole-succinocarboxamide synthase;Phosphoribosylaminoimidazole carboxylase	PAICS	778
NaN	NaN	NaN	NaN	NaN	20.7602	NaN	NaN	21.6055	2	2	2	12.9	12.9	12.9	15.079	0.0011169	2.0622	28913000	3	P22307-6;P22307-2;P22307-4;P22307-7;P22307-8;P22307;P22307-5	P22307-6;P22307-2;P22307-4;P22307-7;P22307-8;P22307;P22307-5	Non-specific lipid-transfer protein	SCP2	779
24.241	24.4623	NaN	24.2179	23.613	23.1809	23.6286	23.115	24.3445	12	12	12	16.3	16.3	16.3	113.8	0	60.401	455200000	31	P22314-2;P22314	P22314-2;P22314	Ubiquitin-like modifier-activating enzyme 1	UBA1	780
NaN	NaN	NaN	24.8845	24.2725	23.209	23.895	26.5168	23.85	11	11	11	14.3	14.3	14.3	104.92	0	127.42	969880000	36	P22413	P22413	Ectonucleotide pyrophosphatase/phosphodiesterase family member 1;Alkaline phosphodiesterase I;Nucleotide pyrophosphatase	ENPP1	781
28.4426	23.6849	21.5003	26.224	23.0659	28.8306	29.0276	25.5841	26.621	21	21	21	60.1	60.1	60.1	37.429	0	323.31	7251300000	261	P22626;P22626-2	P22626;P22626-2	Heterogeneous nuclear ribonucleoproteins A2/B1	HNRNPA2B1	782
NaN	NaN	NaN	NaN	NaN	NaN	NaN	NaN	18.8137	1	1	1	2.9	2.9	2.9	104.76	0.00078927	2.5011	6233200	1	P22670	P22670	MHC class II regulatory factor RFX1	RFX1	783
24.8943	25.5898	24.7063	26.4534	26.2316	25.5276	24.613	26.8782	26.8418	18	18	18	41.1	41.1	41.1	48.442	0	323.31	2538700000	109	P22695	P22695	Cytochrome b-c1 complex subunit 2, mitochondrial	UQCRC2	784
NaN	NaN	NaN	NaN	NaN	NaN	20.1152	NaN	NaN	1	1	1	4.5	4.5	4.5	26.519	0.0031825	1.7985	11430000	2	P22732-2	P22732-2			785
NaN	NaN	NaN	21.9028	22.2757	21.4795	NaN	21.7772	21.5272	4	4	4	17.5	17.5	17.5	47.862	0	4.0211	86170000	7	P22830;P22830-2	P22830;P22830-2	Ferrochelatase, mitochondrial	FECH	786
NaN	NaN	NaN	NaN	NaN	NaN	NaN	NaN	NaN	5	1	0	9.1	1.4	0	77.213	0.0067935	1.5169	3013200	3	P23142;P23142-2;P23142-3	P23142;P23142-2;P23142-3	Fibulin-1	FBLN1	787
22.9126	22.7083	NaN	23.3333	23.3495	21.4615	NaN	24.0719	23.1882	7	7	7	8.9	8.9	8.9	119.09	0	16.42	326740000	26	P23229-4;P23229-2;P23229-5;P23229-3;P23229-9;P23229-6;P23229;P23229-7	P23229-4;P23229-2;P23229-5;P23229-3;P23229-9;P23229-6;P23229;P23229-7	Integrin alpha-6;Integrin alpha-6 heavy chain;Integrin alpha-6 light chain;Processed integrin alpha-6	ITGA6	788
24.8261	23.8937	22.7213	23.2052	22.1708	27.6384	24.8633	24.5073	22.9071	15	15	15	25.7	25.7	25.7	72.262	0	323.31	1955100000	132	P23246-2;P23246	P23246-2;P23246	Splicing factor, proline- and glutamine-rich	SFPQ	789
22.2728	24.0972	NaN	22.9279	23.582	22.519	22.7629	22.2592	21.6308	4	4	4	12.9	12.9	12.9	51.169	0	12.484	187000000	31	P23258;Q9NRH3	P23258;Q9NRH3	Tubulin gamma-1 chain;Tubulin gamma-2 chain	TUBG1;TUBG2	790
24.4174	27.2502	25.6227	25.3573	26.9445	27.1761	23.3621	23.737	27.7673	15	15	15	59.3	59.3	59.3	23.742	0	118.89	2795600000	94	P23284	P23284	Peptidyl-prolyl cis-trans isomerase B	PPIB	791
23.566	22.9804	NaN	25.2278	23.1772	22.3469	24.2882	22.9599	25.0498	6	6	6	20.2	20.2	20.2	48.851	0	72.399	553530000	18	P23381-2;P23381	P23381-2;P23381	Tryptophan--tRNA ligase, cytoplasmic;T1-TrpRS;T2-TrpRS	WARS	792
24.4503	25.9053	NaN	23.9329	24.039	24.674	24.2822	25.7408	25.5096	15	15	15	65.4	65.4	65.4	26.688	0	114.65	1525500000	83	P23396;P23396-2	P23396;P23396-2	40S ribosomal protein S3	RPS3	793
NaN	NaN	NaN	NaN	NaN	NaN	NaN	22.623	NaN	5	2	2	5.6	2.7	2.7	156.09	0	15.347	1092200000	3	P23468-3;P23468-7;P23468-5;P23468-4;P23468-6;P23468;P23468-2	P23468-3;P23468-7;P23468-5;P23468-4;P23468-6;P23468;P23468-2	Receptor-type tyrosine-protein phosphatase delta	PTPRD	794
22.066	NaN	NaN	23.8881	23.321	21.6682	21.6994	23.8349	21.9484	7	7	7	8.1	8.1	8.1	158.77	0	9.2684	228750000	13	P23470-2;P23470	P23470-2;P23470	Receptor-type tyrosine-protein phosphatase gamma	PTPRG	795
NaN	NaN	NaN	NaN	NaN	22.3224	22.7178	NaN	NaN	4	4	4	23.1	23.1	23.1	53.112	0	34.042	100500000	7	P23497-5;P23497-2;P23497-3;P23497;P23497-4;P23497-7;P23497-6	P23497-5;P23497-2;P23497-3;P23497;P23497-4;P23497-7;P23497-6	Nuclear autoantigen Sp-100	SP100	796
22.0979	21.973	NaN	25.2397	22.6853	21.8515	23.2733	25.3047	26.1509	9	9	9	24.8	24.8	24.8	47.716	0	302.32	919940000	32	P23526;P23526-2	P23526;P23526-2	Adenosylhomocysteinase	AHCY	797
26.2837	27.0242	27.2202	25.6079	27.8624	26.8156	26.8252	27.9928	29.1667	13	13	12	87.3	87.3	80.1	18.502	0	323.31	8063600000	214	P23528;Q9Y281-3;Q9Y281	P23528	Cofilin-1	CFL1	798
NaN	NaN	NaN	NaN	NaN	NaN	NaN	NaN	21.7408	2	2	2	4.2	4.2	4.2	64.805	0.00078125	2.4318	47135000	3	P23588-2;P23588	P23588-2;P23588	Eukaryotic translation initiation factor 4B	EIF4B	799
22.3882	21.8925	NaN	25.4227	23.4078	21.964	23.2023	25.2906	23.9053	13	11	11	18.9	16.2	16.2	132.59	0	32.542	597570000	28	P23634-7;P23634-6;P23634-8;P23634;P23634-5;P23634-4;P23634-3;P23634-2	P23634-7;P23634-6;P23634-8;P23634;P23634-5;P23634-4;P23634-3;P23634-2	Plasma membrane calcium-transporting ATPase 4	ATP2B4	800
23.6899	23.7044	24.9028	26.0092	24.2204	23.2348	24.2334	24.6318	26.4533	4	4	4	20.4	20.4	20.4	24.763	0	80.449	1547300000	45	P24534	P24534	Elongation factor 1-beta	EEF1B2	801
21.6209	23.4746	23.622	23.4289	23.7341	23.4063	21.9816	22.4433	22.4727	4	4	4	19.1	19.1	19.1	28.908	0	5.8381	264440000	15	P24539	P24539	ATP synthase F(0) complex subunit B1, mitochondrial	ATP5F1	802
NaN	NaN	NaN	NaN	NaN	NaN	NaN	NaN	20.4255	1	1	1	29.8	29.8	29.8	14.342	0	3.4845	8936400	1	P24666-3;P24666-2;P24666	P24666-3;P24666-2;P24666	Low molecular weight phosphotyrosine protein phosphatase	ACP1	803
22.4126	22.4194	NaN	24.1323	22.2325	22.0841	22.1577	22.7158	23.1952	3	3	3	15.5	15.5	15.5	45.199	0	6.9446	229980000	11	P24752;P24752-2	P24752	Acetyl-CoA acetyltransferase, mitochondrial	ACAT1	804
25.9588	27.6937	23.0691	28.523	29.3698	28.4204	31.3185	27.0987	21.0685	86	86	86	42.2	42.2	42.2	230.86	0	323.31	21366000000	1000	P24821-4;P24821;P24821-2;P24821-3;P24821-5;P24821-6	P24821-4;P24821;P24821-2;P24821-3;P24821-5;P24821-6	Tenascin	TNC	805
23.5519	NaN	NaN	NaN	NaN	22.3991	23.2316	NaN	22.4451	6	6	6	21.2	21.2	21.2	63.64	0	38.262	120090000	14	P24928-2;P24928	P24928-2;P24928	DNA-directed RNA polymerase II subunit RPB1	POLR2A	806
23.0978	23.1789	NaN	23.6851	NaN	21.7555	22.6539	22.9551	NaN	5	4	4	31.1	28	28	30.035	0	8.0322	188760000	6	P24941-2;P24941;Q00526	P24941-2;P24941	Cyclin-dependent kinase 2	CDK2	807
NaN	NaN	NaN	NaN	NaN	NaN	NaN	NaN	NaN	1	1	1	0.5	0.5	0.5	300.44	0.0048209	1.6111	2904800	1	P25054-2;P25054-3;P25054	P25054-2;P25054-3;P25054	Adenomatous polyposis coli protein	APC	808
24.9035	24.8181	24.4953	24.5548	24.2746	23.6892	24.7091	24.198	24.8533	14	14	14	20.4	20.4	20.4	90.98	0	91.46	941610000	75	P25205;P25205-2	P25205;P25205-2	DNA replication licensing factor MCM3	MCM3	809
23.1236	NaN	NaN	22.6816	22.1009	23.7611	NaN	24.9173	24.7458	5	5	5	56.8	56.8	56.8	14.515	0	323.31	575710000	24	P25398	P25398	40S ribosomal protein S12	RPS12	810
NaN	NaN	NaN	NaN	NaN	NaN	NaN	24.5094	23.079	5	5	5	22	22	22	35.386	0	12.242	218630000	9	P25445-6;P25445;P25445-5;P25445-4;P25445-7	P25445-6;P25445	Tumor necrosis factor receptor superfamily member 6	FAS	811
NaN	NaN	NaN	NaN	NaN	23.0946	NaN	20.7003	20.7233	3	3	3	20.4	20.4	20.4	27.016	0	4.4094	82904000	5	P25685-2;P25685	P25685-2;P25685	DnaJ homolog subfamily B member 1	DNAJB1	812
28.2806	29.3766	29.9534	28.8614	29.7277	29.2746	28.2696	28.4792	28.6181	40	40	40	58.4	58.4	58.4	59.75	0	323.31	18472000000	587	P25705;P25705-2;P25705-3	P25705;P25705-2;P25705-3	ATP synthase subunit alpha, mitochondrial	ATP5A1	813
21.56	NaN	NaN	23.2846	NaN	NaN	21.5309	20.9767	21.8559	3	3	3	17.1	17.1	17.1	29.555	0	41.474	92589000	8	P25786;P25786-2	P25786;P25786-2	Proteasome subunit alpha type-1	PSMA1	814
21.3784	NaN	NaN	22.5804	NaN	NaN	21.3804	NaN	21.7595	3	3	3	19.7	19.7	19.7	25.898	0	3.6333	57215000	6	P25787	P25787	Proteasome subunit alpha type-2	PSMA2	815
25.271	25.5971	25.2043	26.8071	26.8143	23.4887	27.0637	30.1296	29.4106	28	28	28	20.2	20.2	20.2	116.61	0	323.31	13729000000	338	P26006;P26006-1	P26006;P26006-1	Integrin alpha-3;Integrin alpha-3 heavy chain;Integrin alpha-3 light chain	ITGA3	816
21.4002	23.6487	23.5101	20.9786	22.1708	21.2727	21.7565	21.6262	23.0047	7	3	3	10.4	5.5	5.5	67.819	0	39.785	181010000	15	P26038	P26038	Moesin	MSN	817
NaN	25.3072	25.3422	23.9162	25.2745	22.7517	NaN	24.7868	23.7685	7	7	7	23.2	23.2	23.2	54.416	0	26.453	502000000	16	P26196	P26196	Probable ATP-dependent RNA helicase DDX6	DDX6	818
NaN	NaN	22.8944	NaN	NaN	22.7536	NaN	22.2004	22.7681	4	4	4	21.9	21.9	21.9	53.12	0	19.631	238260000	18	P26368-2;P26368	P26368-2;P26368	Splicing factor U2AF 65 kDa subunit	U2AF2	819
25.4889	24.1427	24.5317	23.7314	22.5137	25.5436	25.8544	23.7274	23.672	10	10	10	41.7	41.7	41.7	24.261	0	74.481	1367500000	88	P26373;P26373-2	P26373;P26373-2	60S ribosomal protein L13	RPL13	820
NaN	NaN	NaN	22.6791	NaN	19.2931	NaN	NaN	NaN	2	2	2	25.7	25.7	25.7	11.728	0	7.9829	51750000	8	P26447	P26447	Protein S100-A4	S100A4	821
21.9017	24.0823	23.9774	23.2883	24.3374	22.7694	22.5434	23.9483	21.4646	6	6	6	16.2	16.2	16.2	50.878	0	98.322	336670000	27	P26572	P26572	Alpha-1,3-mannosyl-glycoprotein 2-beta-N-acetylglucosaminyltransferase	MGAT1	822
26.285	25.7384	25.1709	25.3781	25.9827	28.6068	26.3937	26.3494	27.7518	19	19	17	51.6	51.6	49.3	57.221	0	323.31	5752000000	193	P26599;P26599-2;P26599-3	P26599;P26599-2;P26599-3	Polypyrimidine tract-binding protein 1	PTBP1	823
NaN	21.9026	NaN	22.9007	NaN	NaN	NaN	NaN	22.5913	5	5	5	10	10	10	83.434	0	43.089	91827000	8	P26639;P26639-2	P26639;P26639-2	Threonine--tRNA ligase, cytoplasmic	TARS	824
22.0476	21.4725	NaN	24.0106	22.4128	21.7783	NaN	21.391	22.0859	6	6	6	7.8	7.8	7.8	140.47	0	69.755	179160000	15	P26640;P26640-2	P26640	Valine--tRNA ligase	VARS	825
26.0464	26.2552	26.5263	28.1155	26.0612	24.9329	26.1279	27.2054	27.1112	21	21	21	35.2	35.2	35.2	50.118	0	323.31	4295300000	224	P26641;P26641-2	P26641;P26641-2	Elongation factor 1-gamma	EEF1G	826
NaN	NaN	NaN	NaN	NaN	21.4006	NaN	NaN	22.0458	3	3	3	19.7	19.7	19.7	15.649	0	6.5249	53600000	4	P26885	P26885	Peptidyl-prolyl cis-trans isomerase FKBP2	FKBP2	827
23.0596	24.6664	23.7133	22.3426	NaN	21.2224	22.7796	22.0399	22.2598	2	2	2	11.5	11.5	11.5	31.73	0	3.9309	148380000	10	P27105;P27105-2	P27105;P27105-2	Erythrocyte band 7 integral membrane protein	STOM	828
NaN	NaN	NaN	NaN	NaN	20.8618	NaN	20.3062	NaN	2	2	2	10.3	10.3	10.3	25.268	0	4.3699	23357000	3	P27144	P27144	Adenylate kinase 4, mitochondrial	AK4	829
25.8725	26.7768	26.6323	27.8888	26.863	23.1136	26.281	28.5317	28.0489	11	11	10	31	31	31	27.764	0	323.31	5667100000	123	P27348	P27348	14-3-3 protein theta	YWHAQ	830
21.9474	22.4313	NaN	21.9915	NaN	NaN	22.0761	23.7029	23.3693	6	5	5	20.3	17.2	17.2	43.135	0	12.834	206090000	12	P27361;P27361-2;P27361-3	P27361;P27361-2;P27361-3	Mitogen-activated protein kinase 3	MAPK3	831
NaN	NaN	NaN	NaN	NaN	NaN	NaN	23.3899	NaN	5	5	5	7	7	7	88.278	0	21.545	87437000	4	P27487	P27487	Dipeptidyl peptidase 4;Dipeptidyl peptidase 4 membrane form;Dipeptidyl peptidase 4 soluble form	DPP4	832
24.7008	23.0417	23.0918	22.4817	NaN	26.29	24.6836	23.1497	22.2752	9	9	9	44.4	44.4	44.4	24.604	0	127.92	1127300000	57	P27635;Q96L21	P27635	60S ribosomal protein L10	RPL10	833
NaN	NaN	NaN	NaN	NaN	NaN	NaN	NaN	NaN	1	1	1	3.7	3.7	3.7	68.137	0.0068027	1.5297	19946000	2	P27694	P27694	Replication protein A 70 kDa DNA-binding subunit;Replication protein A 70 kDa DNA-binding subunit, N-terminally processed	RPA1	834
23.892	26.197	26.3524	24.3695	26.3243	23.5026	24.0919	24.0026	23.5306	7	7	7	28	28	28	35.554	0	212.16	1024300000	45	P27695	P27695	DNA-(apurinic or apyrimidinic site) lyase;DNA-(apurinic or apyrimidinic site) lyase, mitochondrial	APEX1	835
NaN	NaN	NaN	22.6835	NaN	21.8896	NaN	NaN	21.6181	8	8	8	4.8	4.8	4.8	242.98	0	31.778	77509000	11	P27708	P27708	CAD protein;Glutamine-dependent carbamoyl-phosphate synthase;Aspartate carbamoyltransferase;Dihydroorotase	CAD	836
NaN	20.8541	20.2269	NaN	19.993	19.8655	NaN	NaN	20.5253	2	2	2	11.3	11.3	11.3	48.141	0	2.6572	26276000	4	P27797	P27797	Calreticulin	CALR	837
24.1699	NaN	23.3681	23.0176	22.9411	21.2055	26.2566	22.6593	22.2393	8	8	8	10.1	10.1	10.1	119.96	0	180.44	595260000	52	P27816-6;P27816;P27816-2;P27816-5;P27816-4	P27816-6;P27816;P27816-2;P27816-5;P27816-4	Microtubule-associated protein 4	MAP4	838
24.7285	24.9278	26.023	26.2669	26.028	25.7922	24.7449	23.7593	26.1475	9	9	9	14.2	14.2	14.2	71.502	0	260.59	1637400000	83	P27824-2;P27824;P27824-3	P27824-2;P27824;P27824-3	Calnexin	CANX	839
NaN	NaN	NaN	23.8204	23.0448	22.1017	NaN	NaN	22.9432	2	2	2	14.1	14.1	14.1	26.411	0	7.8834	187860000	10	P28066;P28066-2	P28066;P28066-2	Proteasome subunit alpha type-5	PSMA5	840
NaN	NaN	NaN	NaN	NaN	NaN	NaN	19.7036	NaN	1	1	1	7.4	7.4	7.4	21.844	0	36.549	15346000	1	P28074-2;P28074	P28074-2;P28074	Proteasome subunit beta type-5	PSMB5	841
NaN	NaN	NaN	19.7556	21.2606	20.6378	NaN	NaN	NaN	3	3	3	8.6	8.6	8.6	62.725	0	7.024	20112000	6	P28288-2;P28288	P28288-2;P28288	ATP-binding cassette sub-family D member 3	ABCD3	842
22.8432	NaN	NaN	NaN	NaN	NaN	NaN	23.0812	NaN	6	6	6	10.2	10.2	10.2	121.45	0	15.751	121520000	13	P28290-2;P28290;P28290-3	P28290-2;P28290;P28290-3	Sperm-specific antigen 2	SSFA2	843
NaN	NaN	NaN	21.4334	20.8942	20.9983	NaN	NaN	NaN	3	3	3	8.4	8.4	8.4	46.944	0	5.164	54297000	10	P28300;Q08397	P28300	Protein-lysine 6-oxidase	LOX	844
25.6562	25.6612	25.2095	25.2193	25.1032	25.1936	24.5464	24.7619	23.8492	11	11	11	26.9	26.9	26.9	73.527	0	59.023	1108100000	64	P28331-4;P28331-5;P28331;P28331-2;P28331-3	P28331-4;P28331-5;P28331;P28331-2;P28331-3	NADH-ubiquinone oxidoreductase 75 kDa subunit, mitochondrial	NDUFS1	845
NaN	NaN	NaN	NaN	NaN	20.8577	NaN	NaN	NaN	6	2	2	7.4	3	3	121.14	0	4.7786	19087000	2	P28370-2;P28370	P28370-2;P28370	Probable global transcription activator SNF2L1	SMARCA1	846
23.7785	23.8066	23.4312	24.2207	23.6756	23.7694	22.8822	24.4482	24.4078	8	8	7	34.2	34.2	30.8	41.389	0	93.211	557890000	48	P28482;P28482-2	P28482;P28482-2	Mitogen-activated protein kinase 1	MAPK1	847
NaN	NaN	NaN	NaN	NaN	NaN	NaN	21.6458	NaN	2	2	2	2.1	2.1	2.1	163.68	0	7.597	35216000	3	P28827;P28827-2;O14522;O14522-1	P28827;P28827-2;O14522;O14522-1	Receptor-type tyrosine-protein phosphatase mu;Receptor-type tyrosine-protein phosphatase T	PTPRM;PTPRT	848
NaN	21.9897	NaN	22.1938	NaN	21.9055	21.7628	22.3095	22.864	7	7	7	20.1	20.1	20.1	52.771	0	69.165	138480000	14	P28838-2;P28838	P28838-2;P28838	Cytosol aminopeptidase	LAP3	849
25.3761	26.8284	26.8341	26.8675	26.0931	21.885	23.3939	27.5248	25.8944	24	21	21	20.9	19	19	108.27	0	159.88	2581600000	98	P29317;P29317-2	P29317	Ephrin type-A receptor 2	EPHA2	850
25.5218	26.0659	25.0972	26.7479	26.2971	22.7668	NaN	25.7611	24.1192	26	26	21	28.6	28.6	26.6	109.87	0	304.93	1383300000	93	P29323-2;P29323-3;P29323;P54762-5;P54762;P54753;Q06187;Q06187-2;P29322	P29323-2;P29323-3;P29323	Ephrin type-B receptor 2	EPHB2	851
21.3977	NaN	NaN	NaN	NaN	NaN	23.1602	22.387	NaN	6	6	6	31.7	31.7	31.7	30.824	0	17.247	115660000	11	P29372-5;P29372-4;P29372-2;P29372	P29372-5;P29372-4;P29372-2;P29372	DNA-3-methyladenine glycosylase	MPG	852
22.991	26.636	26.136	25.1738	24.7242	23.0235	22.9121	24.1815	27.1384	14	14	14	32.4	32.4	32.4	67.877	0	278.55	1516400000	46	P29401;P29401-2	P29401;P29401-2	Transketolase	TKT	853
24.7115	22.4277	22.6355	22.721	21.3171	26.6085	23.9032	22.0288	21.5836	12	12	12	17.1	17.1	17.1	97.55	0	77.807	915430000	60	P29590;P29590-11;P29590-4;P29590-2;P29590-5;P29590-9;P29590-3;P29590-8;P29590-14;P29590-10;P29590-12;P29590-13	P29590;P29590-11;P29590-4;P29590-2;P29590-5;P29590-9;P29590-3;P29590-8;P29590-14;P29590-10;P29590-12;P29590-13	Protein PML	PML	854
23.4962	24.4931	23.1557	25.8129	23.3981	24.4823	24.0714	23.3518	24.7823	7	7	7	31.7	31.7	31.7	31.121	0	311.25	1018100000	43	P29692;P29692-2;P29692-3;P29692-4	P29692;P29692-2;P29692-3	Elongation factor 1-delta	EEF1D	855
22.1298	22.3903	22.7029	23.749	21.9769	20.8731	21.4227	21.8587	20.8036	2	2	2	3.3	3.3	3.3	31.554	0	10.22	112890000	5	P29966	P29966	Myristoylated alanine-rich C-kinase substrate	MARCKS	856
NaN	NaN	NaN	22.2061	NaN	22.3149	20.804	21.3001	21.6231	3	3	3	12.3	12.3	12.3	42.123	0	41.678	90458000	12	P29992;O95837	P29992	Guanine nucleotide-binding protein subunit alpha-11	GNA11	857
NaN	21.724	NaN	22.1921	21.7078	21.9024	NaN	NaN	23.5405	4	4	4	26.1	26.1	26.1	28.993	0	69.512	130970000	12	P30040	P30040	Endoplasmic reticulum resident protein 29	ERP29	858
22.7936	22.7175	23.6212	22.4848	23.3518	23.2296	NaN	24.4601	26.2347	9	9	9	46.9	46.9	46.9	25.035	0	323.31	776630000	43	P30041	P30041	Peroxiredoxin-6	PRDX6	859
NaN	NaN	NaN	NaN	NaN	NaN	NaN	NaN	NaN	1	1	1	6.3	6.3	6.3	22.119	0	3.2776	92640000	5	P30043	P30043	Flavin reductase (NADPH)	BLVRB	860
NaN	23.745	22.0643	23.3467	NaN	23.5387	22.2431	22.7004	24.0429	4	4	4	43.2	43.2	43.2	17.031	0	65.647	311140000	22	P30044-2;P30044-4;P30044-3;P30044	P30044-2;P30044-4;P30044-3;P30044	Peroxiredoxin-5, mitochondrial	PRDX5	861
NaN	23.0356	NaN	21.1177	NaN	22.5295	NaN	23.4061	24.2058	5	5	5	34.9	34.9	34.9	25.838	0	20.984	239580000	12	P30048-2;P30048	P30048-2;P30048	Thioredoxin-dependent peroxide reductase, mitochondrial	PRDX3	862
NaN	NaN	NaN	NaN	NaN	24.0483	NaN	22.7998	22.4312	2	2	2	31	31	31	17.49	0	6.2152	247840000	7	P30049	P30049	ATP synthase subunit delta, mitochondrial	ATP5D	863
24.4026	24.0451	23.831	23.7056	NaN	25.2275	24.4811	23.4769	23.5679	6	6	6	53.3	53.3	53.3	17.818	0	78.054	1034500000	51	P30050;P30050-2	P30050;P30050-2	60S ribosomal protein L12	RPL12	864
23.0958	22.5499	NaN	NaN	NaN	21.092	23.8518	NaN	NaN	3	3	3	11.7	11.7	11.7	31.387	0	4.689	54334000	7	P30084	P30084	Enoyl-CoA hydratase, mitochondrial	ECHS1	865
NaN	NaN	NaN	20.706	NaN	20.6859	NaN	NaN	21.7934	3	3	3	18.9	18.9	18.9	25.855	0	5.5717	55200000	10	P30085-3;P30085;P30085-2	P30085-3;P30085;P30085-2	UMP-CMP kinase	CMPK1	866
NaN	24.0389	24.4775	NaN	NaN	NaN	NaN	NaN	24.491	4	4	4	59.9	59.9	59.9	21.057	0	17.634	214450000	10	P30086	P30086	Phosphatidylethanolamine-binding protein 1;Hippocampal cholinergic neurostimulating peptide	PEBP1	867
26.1199	26.8521	26.7918	26.6176	25.4575	26.217	24.379	23.8256	27.4138	21	21	21	46.7	46.7	46.7	56.782	0	323.31	2455600000	139	P30101	P30101	Protein disulfide-isomerase A3	PDIA3	868
23.5267	24.4588	23.5336	26.5578	25.8359	24.6469	23.6906	26.7509	26.5601	16	16	14	30.4	30.4	26	65.308	0	49.096	1905800000	61	P30153	P30153	Serine/threonine-protein phosphatase 2A 65 kDa regulatory subunit A alpha isoform	PPP2R1A	869
NaN	NaN	NaN	NaN	NaN	NaN	NaN	NaN	NaN	2	2	2	3.1	3.1	3.1	165.67	0.001454	1.9507	13235000	2	P30414	P30414	NK-tumor recognition protein;Putative peptidyl-prolyl cis-trans isomerase	NKTR	870
23.8734	24.4404	23.5725	23.8122	23.2052	22.3264	23.2764	NaN	22.3831	6	6	6	17.7	17.7	17.7	56.806	0	64.075	237300000	27	P30419;P30419-2	P30419;P30419-2	Glycylpeptide N-tetradecanoyltransferase 1	NMT1	871
22.0552	22.482	23.213	23.6502	22.7513	22.6728	22.7449	24.1067	24.6697	8	8	8	39	39	39	32.837	0	46.037	436350000	24	P30519-2;P30519	P30519-2;P30519	Heme oxygenase 2	HMOX2	872
NaN	NaN	NaN	22.7161	NaN	NaN	22.3737	22.3445	22.2946	3	3	3	9.6	9.6	9.6	50.097	0	38.409	107070000	11	P30520	P30520	Adenylosuccinate synthetase isozyme 2	ADSS	873
22.4402	21.9254	22.5491	26.2482	25.5103	NaN	22.5863	25.6851	24.857	10	10	10	15.6	15.6	15.6	97.377	0	212.78	1105400000	61	P30530-2;P30530	P30530-2;P30530	Tyrosine-protein kinase receptor UFO	AXL	874
NaN	NaN	NaN	20.9337	NaN	19.8863	NaN	NaN	NaN	1	1	1	13.6	13.6	13.6	18.828	0	6.674	19286000	11	P30536	P30536	Translocator protein	TSPO	875
NaN	20.8013	NaN	22.6652	NaN	NaN	NaN	21.0171	21.3909	3	3	3	12.4	12.4	12.4	54.889	0	10.411	69889000	8	P30566;P30566-2	P30566;P30566-2	Adenylosuccinate lyase	ADSL	876
NaN	NaN	NaN	23.7272	NaN	NaN	NaN	NaN	NaN	3	3	3	21.2	21.2	21.2	21.676	0	3.6508	66741000	2	P30626;P30626-2;P30626-3	P30626;P30626-2;P30626-3	Sorcin	SRI	877
NaN	NaN	NaN	NaN	NaN	NaN	NaN	NaN	22.0522	4	4	4	12.4	12.4	12.4	42.741	0	9.7881	30264000	5	P30740;P30740-2	P30740;P30740-2	Leukocyte elastase inhibitor	SERPINB1	878
NaN	NaN	NaN	22.5254	NaN	NaN	21.7998	21.6309	NaN	3	3	3	5.2	5.2	5.2	67.638	0	92.996	65438000	12	P30825	P30825	High affinity cationic amino acid transporter 1	SLC7A1	879
NaN	NaN	NaN	23.532	23.6449	23.3512	NaN	22.4611	22.153	7	7	7	18	18	18	57.206	0	23.092	213570000	19	P30837	P30837	Aldehyde dehydrogenase X, mitochondrial	ALDH1B1	880
23.0618	21.9156	NaN	23.1507	21.994	22.6797	23.5159	21.8763	22.7267	8	8	8	10.3	10.3	10.3	133.9	0	14.283	213080000	17	P30876	P30876	DNA-directed RNA polymerase II subunit RPB2	POLR2B	881
23.0068	22.567	NaN	24.5819	22.0476	23.9292	22.9229	22.4716	24.3628	10	10	10	27.3	27.3	27.3	72.691	0	76.672	364960000	34	P31040;P31040-2;P31040-3	P31040;P31040-2;P31040-3	Succinate dehydrogenase [ubiquinone] flavoprotein subunit, mitochondrial	SDHA	882
23.4395	24.6396	23.8572	25.9147	24.9496	23.8781	22.385	25.538	26.3662	12	12	12	28.4	28.4	28.4	43.66	0	140.94	1243600000	37	P31153;P31153-2;Q00266	P31153;P31153-2	S-adenosylmethionine synthase isoform type-2	MAT2A	883
22.9946	23.4373	NaN	24.7547	23.926	23.915	22.7234	23.614	23.4246	8	8	8	29.7	29.7	29.7	44.868	0	55.621	476220000	33	P31689;P31689-2	P31689;P31689-2	DnaJ homolog subfamily A member 1	DNAJA1	884
24.0513	23.9503	22.8362	25.2282	24.9974	24.6921	23.1773	25.4366	26.0814	13	13	13	49.6	49.6	49.6	52.645	0	174.18	1170300000	72	P31930	P31930	Cytochrome b-c1 complex subunit 1, mitochondrial	UQCRC1	885
22.2843	22.5082	NaN	22.3435	NaN	NaN	22.4232	NaN	22.4464	7	7	7	20.8	20.8	20.8	64.615	0	26.346	106040000	15	P31939;P31939-2	P31939;P31939-2	Bifunctional purine biosynthesis protein PURH;Phosphoribosylaminoimidazolecarboxamide formyltransferase;IMP cyclohydrolase	ATIC	886
22.6734	NaN	NaN	22.3714	20.1286	26.3063	24.7033	21.5203	24.0088	11	11	11	55.9	55.9	55.9	35.238	0	275.5	689780000	45	P31942-2;P31942;P31942-3;P31942-4;P31942-6;P31942-5	P31942-2;P31942;P31942-3;P31942-4	Heterogeneous nuclear ribonucleoprotein H3	HNRNPH3	887
24.8261	24.2797	22.1932	25.2629	24.6865	27.3665	24.8759	24.9968	25.5159	24	24	14	47.4	47.4	35.9	49.229	0	323.31	1929400000	136	P31943	P31943	Heterogeneous nuclear ribonucleoprotein H;Heterogeneous nuclear ribonucleoprotein H, N-terminally processed	HNRNPH1	888
23.9657	25.2846	23.9261	25.5644	23.9886	22.5139	24.575	25.7368	26.7041	8	6	5	35.8	35.8	35.8	28.082	0	136.63	1357900000	36	P31946;P31946-2	P31946;P31946-2	14-3-3 protein beta/alpha;14-3-3 protein beta/alpha, N-terminally processed	YWHAB	889
NaN	NaN	NaN	NaN	NaN	NaN	NaN	NaN	NaN	5	4	4	31	27.3	27.3	24.336	0	9.2258	43520000	6	P31947-2;P31947	P31947-2;P31947	14-3-3 protein sigma	SFN	890
21.3919	22.3368	22.1647	22.1548	21.7238	NaN	21.367	21.5398	23.4016	6	6	6	17.9	17.9	17.9	62.639	0	21.823	141520000	13	P31948;P31948-3;P31948-2	P31948;P31948-3;P31948-2	Stress-induced-phosphoprotein 1	STIP1	891
NaN	NaN	NaN	22.8099	NaN	NaN	NaN	20.3309	NaN	2	2	2	46.7	46.7	46.7	11.74	0	2.6651	42520000	5	P31949	P31949	Protein S100-A11;Protein S100-A11, N-terminally processed	S100A11	892
NaN	NaN	NaN	24.9097	23.4139	22.0291	NaN	NaN	NaN	5	5	5	5.2	5.2	5.2	138.91	0	20.969	156860000	17	P32004-3;P32004-2;P32004	P32004-3;P32004-2;P32004	Neural cell adhesion molecule L1	L1CAM	893
25.4121	28.5882	26.5547	24.9819	26.7519	24.9631	24.1565	27.8784	27.3297	14	13	13	53.5	53.5	53.5	21.892	0	323.31	3856800000	153	P32119;P32119-2	P32119	Peroxiredoxin-2	PRDX2	894
NaN	NaN	NaN	21.1034	NaN	NaN	NaN	NaN	NaN	1	1	1	5.5	5.5	5.5	41.224	0.0031746	1.7901	9387900	1	P32249	P32249	G-protein coupled receptor 183	GPR183	895
NaN	NaN	NaN	24.6901	23.3838	23.6061	22.9409	23.0435	NaN	4	4	4	20.4	20.4	20.4	33.36	0	9.1614	340980000	12	P32322;P32322-3;P32322-2;Q96C36	P32322;P32322-3;P32322-2	Pyrroline-5-carboxylate reductase 1, mitochondrial	PYCR1	896
NaN	NaN	NaN	22.8704	21.4082	NaN	NaN	NaN	NaN	2	2	2	2.4	2.4	2.4	67.93	0	3.7564	38871000	3	P32455	P32455	Interferon-induced guanylate-binding protein 1	GBP1	897
NaN	NaN	NaN	NaN	NaN	NaN	NaN	NaN	19.5086	1	1	1	11.2	11.2	11.2	32.424	0	3.5764	4733100	1	P32856-3;P32856-2;P32856	P32856-3;P32856-2;P32856	Syntaxin-2	STX2	898
NaN	NaN	NaN	25.2732	NaN	NaN	NaN	NaN	NaN	4	4	4	18.5	18.5	18.5	44.508	0	86.236	179290000	6	P32929;P32929-3;P32929-2	P32929;P32929-3;P32929-2	Cystathionine gamma-lyase	CTH	899
23.6636	NaN	24.4113	23.1978	23.4255	24.7684	24.2293	23.3067	23.438	10	10	10	54.2	54.2	54.2	21.863	0	26.981	793240000	40	P32969	P32969	60S ribosomal protein L9	RPL9	900
24.0209	24.6387	23.107	25.3377	25.9169	22.0302	23.6641	27.3157	25.6229	5	5	5	35.2	35.2	35.2	21.118	0	323.31	1749600000	47	P32970;P32970-2	P32970;P32970-2	CD70 antigen	CD70	901
NaN	21.9821	NaN	22.4359	22.3355	22.5838	22.9402	23.2281	23.8285	7	7	7	13.8	13.8	13.8	76.87	0	17.751	250310000	12	P33121-2;P33121-3;P33121	P33121-2;P33121-3;P33121	Long-chain-fatty-acid--CoA ligase 1	ACSL1	902
NaN	NaN	NaN	21.5774	NaN	21.5479	NaN	NaN	NaN	3	3	1	10.2	10.2	2	59.251	0	13.208	59628000	4	P33240-2;P33240	P33240-2;P33240	Cleavage stimulation factor subunit 2	CSTF2	903
NaN	23.7597	NaN	NaN	NaN	NaN	NaN	23.5482	25.3894	5	5	5	36	36	36	17.748	0	95.838	462940000	15	P33316-2;P33316	P33316-2;P33316	Deoxyuridine 5-triphosphate nucleotidohydrolase, mitochondrial	DUT	904
21.8666	22.2596	22.0562	22.9877	NaN	NaN	NaN	22.6121	21.8525	6	6	6	8.2	8.2	8.2	158.28	0	13.321	128730000	12	P33527-7;P33527-4;P33527-3;P33527;P33527-8;P33527-6;P33527-5;P33527-2;P33527-9	P33527-7;P33527-4;P33527-3;P33527;P33527-8;P33527-6;P33527-5;P33527-2;P33527-9	Multidrug resistance-associated protein 1	ABCC1	905
NaN	NaN	NaN	20.0645	NaN	NaN	NaN	NaN	NaN	1	1	1	20.8	20.8	20.8	11.713	0	3.9552	4569300	1	P33764	P33764	Protein S100-A3	S100A3	906
NaN	NaN	NaN	20.866	NaN	NaN	NaN	NaN	22.2257	3	3	3	7.3	7.3	7.3	96.557	0	9.255	48354000	3	P33991	P33991	DNA replication licensing factor MCM4	MCM4	907
22.6226	24.443	23.8356	22.8002	24.0961	22.3285	22.8811	23.5638	23.1366	8	8	8	18.1	18.1	18.1	82.285	0	18.758	352090000	29	P33992	P33992	DNA replication licensing factor MCM5	MCM5	908
21.7782	22.3642	20.9849	21.9397	21.7011	21.138	21.0018	22.8762	24.681	9	9	9	17.7	17.7	17.7	81.307	0	43.958	296530000	21	P33993;P33993-2;P33993-3	P33993;P33993-2;P33993-3	DNA replication licensing factor MCM7	MCM7	909
23.6885	24.4262	23.9288	24.2833	22.7766	25.1256	23.8339	26.4385	23.236	15	15	15	55.5	55.5	55.5	53.454	0	323.31	1413800000	83	P34897-3;P34897;P34897-2	P34897-3;P34897;P34897-2	Serine hydroxymethyltransferase, mitochondrial	SHMT2	910
NaN	NaN	NaN	NaN	NaN	NaN	NaN	21.4434	NaN	6	1	1	12.6	3.4	3.4	70.374	0.008426	1.4807	57240000	1	P34931	P34931	Heat shock 70 kDa protein 1-like	HSPA1L	911
NaN	21.1622	NaN	23.6502	NaN	21.1124	21.4173	NaN	22.0701	7	7	6	17.5	17.5	15.8	94.33	0	88.023	108250000	9	P34932;P34932-2	P34932	Heat shock 70 kDa protein 4	HSPA4	912
NaN	NaN	NaN	NaN	NaN	NaN	NaN	NaN	NaN	1	1	1	5.4	5.4	5.4	25.924	0	149.2	1663800000	68	P35030-5;P35030-3;P35030-2;P35030-4;P35030	P35030-5;P35030-3;P35030-2;P35030-4;P35030	Trypsin-3	PRSS3	913
23.845	23.4287	NaN	NaN	NaN	22.8255	NaN	NaN	NaN	6	6	6	17.7	17.7	17.7	61.68	0	14.49	69442000	15	P35052;P35052-2	P35052;P35052-2	Glypican-1;Secreted glypican-1	GPC1	914
NaN	NaN	NaN	NaN	22.2816	22.534	NaN	23.1126	24.0781	5	5	5	30.7	30.7	30.7	15.088	0	323.31	219370000	13	P35080-2;P35080	P35080-2	Profilin-2	PFN2	915
23.1869	24.0031	23.4814	24.0216	24.9239	22.9602	NaN	24.6934	23.508	15	15	15	19.6	19.6	19.6	100.07	0	226.54	565760000	43	P35221;P35221-2;P35221-3;P26232-3;P26232-2;P26232-5;P26232;P26232-4;P26232-6	P35221;P35221-2	Catenin alpha-1	CTNNA1	916
25.9195	24.2513	24.9447	26.0568	26.3803	22.9876	23.5381	24.7161	24.4775	15	15	14	29.7	29.7	28.4	85.496	0	323.31	1008600000	64	P35222	P35222	Catenin beta-1	CTNNB1	917
26.6084	28.7683	28.5452	26.5966	28.5029	28.8841	26.6113	27.3634	27.0514	27	27	27	93.8	93.8	93.8	29.804	0	323.31	8420300000	376	P35232;P35232-2	P35232;P35232-2	Prohibitin	PHB	918
NaN	NaN	NaN	NaN	NaN	NaN	NaN	NaN	22.4082	2	2	2	6.9	6.9	6.9	42.621	0	8.789	54866000	2	P35237	P35237	Serpin B6	SERPINB6	919
NaN	22.5423	NaN	22.4784	NaN	23.4224	NaN	22.192	22.4478	2	2	2	32.2	32.2	32.2	13.569	0	4.7794	197320000	11	P35244	P35244	Replication protein A 14 kDa subunit	RPA3	920
NaN	NaN	NaN	NaN	NaN	NaN	NaN	NaN	NaN	2	2	2	8.1	8.1	8.1	35.243	0	3.6363	12294000	2	P35250-2;P35250	P35250-2;P35250	Replication factor C subunit 2	RFC2	921
22.0936	23.0417	NaN	NaN	NaN	24.3798	22.4836	22.1249	NaN	7	7	5	51.6	51.6	44.5	14.787	0	20.117	367200000	35	P35268	P35268	60S ribosomal protein L22	RPL22	922
NaN	NaN	NaN	NaN	NaN	NaN	NaN	NaN	NaN	2	2	2	7	7	7	58.24	0	5.0251	48857000	3	P35269	P35269	General transcription factor IIF subunit 1	GTF2F1	923
NaN	23.3518	NaN	22.7062	25.8661	24.6126	25.3977	25.419	23.4548	8	8	8	18.1	18.1	18.1	72.669	0	104.87	867190000	31	P35475;P35475-2	P35475;P35475-2	Alpha-L-iduronidase	IDUA	924
23.4316	NaN	NaN	NaN	NaN	21.7921	24.0009	NaN	NaN	16	16	13	8	8	7.3	312.3	0	33.716	214410000	42	P35555	P35555	Fibrillin-1	FBN1	926
22.1607	21.9348	NaN	NaN	NaN	NaN	NaN	NaN	NaN	6	3	3	2.7	2	2	314.77	0	14.979	32876000	7	P35556;P35556-2	P35556;P35556-2	Fibrillin-2	FBN2	927
27.7849	26.123	25.0568	27.9737	25.9841	28.3304	26.5184	26.1415	26.5039	116	116	110	56.4	56.4	54.8	226.53	0	323.31	13146000000	607	P35579;P35579-2;P35749-4;P35749-3;P35749;P35749-2	P35579;P35579-2	Myosin-9	MYH9	928
22.6386	NaN	NaN	NaN	NaN	22.473	NaN	NaN	NaN	13	8	8	8.7	6.1	6.1	229	0	225.62	90131000	8	P35580;P35580-5;P35580-2;P35580-3;P35580-4	P35580;P35580-5;P35580-2;P35580-3;P35580-4	Myosin-10	MYH10	929
NaN	NaN	NaN	NaN	NaN	NaN	NaN	NaN	21.0566	1	1	1	1.8	1.8	1.8	64.734	0	2.6239	34305000	3	P35610	P35610	Sterol O-acyltransferase 1	SOAT1	930
NaN	NaN	NaN	NaN	NaN	NaN	NaN	NaN	21.1834	2	2	2	4.4	4.4	4.4	69.984	0	2.7956	73849000	3	P35611-2;P35611-6;P35611;P35611-3;P35611-5;P35611-4	P35611-2;P35611-6;P35611;P35611-3;P35611-5;P35611-4	Alpha-adducin	ADD1	931
24.7159	26.4827	26.0295	27.7882	26.6728	23.3502	23.6199	28.6246	24.5889	11	11	11	48.3	48.3	48.3	29.221	0	323.31	3924200000	146	P35613-2;P35613;P35613-3;P35613-4	P35613-2;P35613;P35613-3;P35613-4	Basigin	BSG	932
22.5754	22.6499	23.3799	NaN	NaN	NaN	22.7665	NaN	NaN	1	1	1	4.4	4.4	4.4	53.354	0	15.144	125160000	6	P35637-2;P35637	P35637-2;P35637	RNA-binding protein FUS	FUS	933
NaN	NaN	NaN	NaN	NaN	22.6013	NaN	NaN	NaN	4	4	4	2.9	2.9	2.9	212.57	0	6.2882	69703000	4	P35658-2;P35658-4;P35658;P35658-3;P35658-5	P35658-2;P35658-4;P35658;P35658-3;P35658-5	Nuclear pore complex protein Nup214	NUP214	934
NaN	NaN	NaN	NaN	NaN	NaN	NaN	NaN	NaN	1	1	1	3.5	3.5	3.5	38.704	0.0007593	2.1873	25890000	5	P35659-2;P35659	P35659-2;P35659	Protein DEK	DEK	935
NaN	NaN	NaN	NaN	NaN	NaN	NaN	21.9264	22.2253	2	2	2	6.8	6.8	6.8	51.366	0	3.7799	71226000	7	P35813-3;P35813;P35813-2	P35813-3;P35813;P35813-2	Protein phosphatase 1A	PPM1A	936
NaN	NaN	NaN	NaN	NaN	21.968	NaN	NaN	NaN	3	3	3	13.8	13.8	13.8	34.36	0.0021692	1.9187	63612000	2	P35914;P35914-3;P35914-2	P35914;P35914-3;P35914-2	Hydroxymethylglutaryl-CoA lyase, mitochondrial	HMGCL	937
NaN	NaN	NaN	21.8698	NaN	NaN	22.2966	21.9097	22.8768	5	5	5	20.6	20.6	20.6	48.633	0	57.194	106650000	11	P35998;P35998-2	P35998;P35998-2	26S protease regulatory subunit 7	PSMC2	938
NaN	NaN	NaN	NaN	NaN	NaN	NaN	NaN	21.649	1	1	1	9.9	9.9	9.9	20.455	0.00076336	2.2237	29087000	1	P36405	P36405	ADP-ribosylation factor-like protein 3	ARL3	939
NaN	NaN	24.2421	20.2993	NaN	20.5062	20.4385	NaN	20.6356	9	1	1	31.9	6.4	6.4	32.996	0	10.431	58270000	4	P36542	P36542	ATP synthase subunit gamma, mitochondrial	ATP5C1	940
23.8883	25.5097	25.9554	24.0721	25.4094	24.9831	23.9534	23.3002	24.2174	9	9	1	31.6	31.6	6.1	32.881	0	52.427	811540000	44	P36542-2	P36542-2	ATP synthase subunit gamma, mitochondrial	ATP5C1	941
NaN	NaN	NaN	22.0533	NaN	NaN	NaN	NaN	22.1216	3	3	3	21.7	21.7	21.7	26.145	0	27.532	70653000	6	P36543;P36543-3;P36543-2	P36543;P36543-3;P36543-2	V-type proton ATPase subunit E 1	ATP6V1E1	942
NaN	NaN	NaN	23.3508	NaN	23.4098	22.2276	21.3049	25.8797	8	8	8	19.8	19.8	19.8	50.151	0	241.68	528410000	20	P36551;P36551-2	P36551	Oxygen-dependent coproporphyrinogen-III oxidase, mitochondrial	CPOX	943
26.3939	24.7125	23.9225	25.2538	22.7794	27.926	26.9451	24.792	24.0728	22	22	22	53.9	53.9	53.9	47.697	0	323.31	3314500000	199	P36578	P36578	60S ribosomal protein L4	RPL4	944
NaN	NaN	NaN	22.5443	NaN	21.5078	NaN	NaN	NaN	3	3	3	7.3	7.3	7.3	85.64	0	4.7929	44964000	4	P36776-3;P36776-2;P36776	P36776-3;P36776-2;P36776	Lon protease homolog, mitochondrial	LONP1	945
NaN	NaN	NaN	NaN	NaN	19.9459	NaN	NaN	NaN	2	1	1	9	4.3	4.3	36.983	0.0041638	1.6677	8117500	0	P36873;P36873-2	P36873;P36873-2	Serine/threonine-protein phosphatase PP1-gamma catalytic subunit	PPP1CC	946
21.6621	NaN	NaN	NaN	NaN	NaN	22.0214	21.1796	20.4978	3	3	3	32	32	32	14.523	0	4.8043	37495000	6	P36954	P36954	DNA-directed RNA polymerase II subunit RPB9	POLR2I	947
NaN	NaN	20.4269	NaN	NaN	NaN	NaN	NaN	NaN	1	1	1	3.9	3.9	3.9	42.785	0.00077791	2.392	5503100	3	P37059	P37059	Estradiol 17-beta-dehydrogenase 2	HSD17B2	948
22.9194	NaN	NaN	NaN	20.2519	23.4907	NaN	NaN	20.9622	2	2	2	28.7	28.7	28.7	14.57	0	16.259	159000000	13	P37108	P37108	Signal recognition particle 14 kDa protein	SRP14	949
22.0878	21.7094	NaN	NaN	21.5655	NaN	NaN	24.1645	23.0563	6	6	6	11.5	11.5	11.5	64.567	0	18.502	219360000	11	P37173;P37173-2	P37173;P37173-2	TGF-beta receptor type-2	TGFBR2	950
NaN	NaN	NaN	21.0595	NaN	23.8895	22.0147	NaN	21.2644	3	3	3	11.9	11.9	11.9	53.254	0	123.59	109500000	7	P37198	P37198	Nuclear pore glycoprotein p62	NUP62	951
NaN	NaN	NaN	NaN	NaN	NaN	NaN	24.2213	23.3815	5	5	5	21.8	21.8	21.8	22.313	0	20.426	196980000	10	P37235;P84074;P61601	P37235;P84074	Hippocalcin-like protein 1;Neuron-specific calcium-binding protein hippocalcin	HPCAL1;HPCA	952
NaN	NaN	NaN	NaN	NaN	NaN	NaN	NaN	22.1093	3	3	3	13.6	13.6	13.6	43.06	0	10.364	51338000	6	P37268-5;P37268;P37268-4;P37268-3;P37268-2	P37268-5;P37268;P37268-4;P37268-3;P37268-2	Squalene synthase	FDFT1	953
23.812	24.2096	21.8426	24.8541	23.2228	21.9451	22.8086	23.1975	22.3755	5	5	5	18.2	18.2	18.2	24.454	0	315.65	349930000	34	P37802-2;P37802;Q9UI15	P37802-2;P37802	Transgelin-2	TAGLN2	954
23.7243	22.9946	22.3583	22.9763	22.5476	NaN	23.0096	NaN	24.6082	4	4	4	13.9	13.9	13.9	37.54	0	10.384	256910000	9	P37837	P37837	Transaldolase	TALDO1	955
NaN	NaN	NaN	NaN	NaN	NaN	NaN	NaN	22.2006	3	3	3	14.1	14.1	14.1	27.843	0	5.0372	42122000	4	P38117;P38117-2	P38117;P38117-2	Electron transfer flavoprotein subunit beta	ETFB	956
25.745	21.3235	NaN	23.9048	NaN	26.804	27.0224	24.3517	25.121	18	18	18	49.4	49.4	49.4	42.331	0	323.31	1789800000	134	P38159;P38159-2;Q96E39;P38159-3;O75526	P38159;P38159-2;Q96E39	RNA-binding motif protein, X chromosome;RNA-binding motif protein, X chromosome, N-terminally processed;RNA binding motif protein, X-linked-like-1	RBMX;RBMXL1	957
22.7122	22.4496	NaN	24.128	22.8279	22.4042	21.8912	22.5405	23.3142	8	8	8	22.5	22.5	22.5	68.303	0	44.624	273050000	22	P38606;P38606-2	P38606;P38606-2	V-type proton ATPase catalytic subunit A	ATP6V1A	958
25.333	25.4552	25.0073	26.8187	26.0295	27.0733	25.1953	26.1189	27.7696	19	19	19	31.5	31.5	31.5	73.68	0	323.31	3779100000	159	P38646	P38646	Stress-70 protein, mitochondrial	HSPA9	959
24.5107	21.4172	NaN	22.4882	NaN	26.5832	24.9455	21.7189	23.3711	14	13	13	42.1	38.2	38.2	46.871	0	91.017	929210000	62	P38919	P38919	Eukaryotic initiation factor 4A-III;Eukaryotic initiation factor 4A-III, N-terminally processed	EIF4A3	960
23.5091	24.5867	25.4226	22.3358	NaN	25.0149	24.0176	26.0939	24.9436	10	10	10	50.3	50.3	50.3	16.06	0	323.31	2156500000	100	P39019	P39019	40S ribosomal protein S19	RPS19	961
25.502	23.3526	23.1152	23.8899	21.2129	26.7941	25.5146	22.4447	23.1496	13	13	13	30.5	30.5	30.5	46.108	0	97.177	1418700000	90	P39023;Q92901	P39023	60S ribosomal protein L3	RPL3	962
24.8003	24.0111	23.184	NaN	NaN	NaN	NaN	NaN	NaN	9	9	9	11.7	11.7	11.7	135.76	0	91.295	181690000	15	P39060-2;P39060-1;P39060	P39060-2;P39060-1;P39060	Collagen alpha-1(XVIII) chain;Endostatin	COL18A1	963
NaN	NaN	NaN	NaN	NaN	20.4864	NaN	NaN	NaN	1	1	1	18.2	18.2	18.2	19.733	0	9.5273	19989000	2	P39210	P39210	Protein Mpv17	MPV17	964
23.459	24.7964	25.5013	24.6	25.0674	25.6676	23.5444	24.4175	24.7275	9	9	9	25.7	25.7	25.7	50.8	0	54.968	1002700000	55	P39656;P39656-3;P39656-2	P39656;P39656-3;P39656-2	Dolichyl-diphosphooligosaccharide--protein glycosyltransferase 48 kDa subunit	DDOST	965
22.5557	24.9739	NaN	21.6788	22.8782	21.4502	21.6259	23.547	21.9697	2	2	2	7.1	7.1	7.1	42.592	0	3.9731	191540000	15	P39748;P39748-2	P39748;P39748-2	Flap endonuclease 1	FEN1	966
21.9328	21.5255	NaN	NaN	21.5288	NaN	22.247	NaN	24.223	4	4	4	17.4	17.4	17.4	36.856	0	5.79	150390000	5	P40121-2;P40121	P40121-2;P40121	Macrophage-capping protein	CAPG	967
23.2433	23.8943	23.7186	25.1021	24.4156	NaN	NaN	23.2419	23.0145	9	9	9	15	15	15	103.54	0	35.479	383290000	24	P40189;P40189-3;P40189-2	P40189;P40189-3	Interleukin-6 receptor subunit beta	IL6ST	968
NaN	NaN	NaN	NaN	NaN	NaN	NaN	NaN	NaN	2	2	2	8.6	8.6	8.6	61.89	0	17.749	101590000	5	P40222	P40222	Alpha-taxilin	TXLNA	969
23.8429	23.2728	22.5795	25.0815	NaN	24.2367	23.5795	23.3195	24.1138	12	12	12	33.1	33.1	33.1	58.024	0	81.906	521680000	21	P40227;P40227-2;Q92526-3;Q92526;Q92526-2	P40227;P40227-2	T-complex protein 1 subunit zeta	CCT6A	970
24.7087	22.8938	23.423	23.0461	NaN	25.4268	25.5345	22.4421	22.0368	7	7	7	29.6	29.6	29.6	23.577	0	49.386	710980000	47	P40429;Q6NVV1	P40429;Q6NVV1	60S ribosomal protein L13a;Putative 60S ribosomal protein L13a protein RPL13AP3	RPL13A;RPL13AP3	971
NaN	NaN	NaN	21.9396	NaN	20.1173	NaN	20.2153	20.3852	2	2	2	14.6	14.6	14.6	18.565	0	3.7246	41313000	4	P40616-2;P40616	P40616-2;P40616	ADP-ribosylation factor-like protein 1	ARL1	972
21.473	22.3442	21.5178	22.896	22.8239	21.2635	NaN	21.8643	21.0795	4	4	4	9	9	9	88.067	0	11.612	96121000	9	P40763;P40763-3;P40763-2	P40763;P40763-3;P40763-2	Signal transducer and activator of transcription 3	STAT3	973
21.415	25.355	23.5641	NaN	23.9712	20.8742	NaN	22.0523	24.3817	6	6	6	30.6	30.6	30.6	27.025	0	34.614	298090000	24	P40925-2;P40925;P40925-3	P40925-2;P40925;P40925-3	Malate dehydrogenase, cytoplasmic	MDH1	974
24.7051	25.7127	24.9232	25.1275	26.1863	25.4778	24.5913	24.4846	24.8387	15	15	15	55	55	55	35.503	0	119.93	1400000000	75	P40926;P40926-2	P40926;P40926-2	Malate dehydrogenase, mitochondrial	MDH2	975
25.9621	25.605	24.0081	25.0782	24.963	25.3398	25.6853	25.4818	25.6448	16	16	16	22.9	22.9	22.9	82.999	0	175.26	1413400000	107	P40939	P40939	Trifunctional enzyme subunit alpha, mitochondrial;Long-chain enoyl-CoA hydratase;Long chain 3-hydroxyacyl-CoA dehydrogenase	HADHA	976
24.214	24.7323	25.0099	23.1924	25.4685	25.9037	23.7296	22.9833	23.748	15	15	15	44.7	44.7	44.7	51.109	0	323.31	1072600000	66	P41091;Q2VIR3;Q2VIR3-2	P41091;Q2VIR3;Q2VIR3-2	Eukaryotic translation initiation factor 2 subunit 3;Putative eukaryotic translation initiation factor 2 subunit 3-like protein	EIF2S3;EIF2S3L	977
NaN	NaN	NaN	NaN	NaN	21.374	NaN	NaN	NaN	2	2	2	20.9	20.9	20.9	19.738	0	9.5249	72809000	5	P41208	P41208	Centrin-2	CETN2	978
NaN	NaN	NaN	20.5152	NaN	24.4416	20.6465	NaN	NaN	2	2	2	8.6	8.6	8.6	52.999	0	4.2746	112190000	4	P41212	P41212	Transcription factor ETV6	ETV6	979
NaN	NaN	NaN	NaN	NaN	NaN	18.7562	22.094	18.8846	3	3	3	14.5	14.5	14.5	40.886	0	17.076	52791000	6	P41221-2;P41221	P41221-2;P41221	Protein Wnt-5a	WNT5A	980
NaN	NaN	NaN	19.4752	NaN	NaN	NaN	NaN	NaN	1	1	1	1.7	1.7	1.7	111.69	0.00075188	2.1173	3037100	1	P41226	P41226	Ubiquitin-like modifier-activating enzyme 7	UBA7	981
NaN	21.3222	NaN	22.909	21.2973	NaN	NaN	21.4749	21.8336	2	2	2	11.4	11.4	11.4	24.783	0	14.211	92741000	7	P41227-2;P41227	P41227-2;P41227	N-alpha-acetyltransferase 10	NAA10	982
NaN	NaN	NaN	NaN	NaN	NaN	NaN	NaN	18.9452	2	2	2	5.3	5.3	5.3	50.704	0	2.6719	8585000	2	P41240;P42679-3;P42679;P42679-2	P41240;P42679-3;P42679;P42679-2	Tyrosine-protein kinase CSK;Megakaryocyte-associated tyrosine-protein kinase	CSK;MATK	983
NaN	22.9588	NaN	22.9958	NaN	NaN	NaN	23.3531	24.3804	4	4	4	7.2	7.2	7.2	83.165	0	50.838	275880000	8	P41250	P41250	Glycine--tRNA ligase	GARS	984
NaN	NaN	NaN	NaN	NaN	22.6312	22.44	NaN	NaN	5	5	5	4.7	4.7	4.7	144.5	0	11.227	123560000	6	P41252	P41252	Isoleucine--tRNA ligase, cytoplasmic	IARS	985
NaN	NaN	NaN	NaN	NaN	NaN	NaN	23.5087	22.2876	3	3	3	11.3	11.3	11.3	60.033	0	102.62	113180000	6	P41440-2;P41440	P41440-2;P41440	Folate transporter 1	SLC19A1	986
NaN	NaN	NaN	22.641	NaN	NaN	NaN	NaN	NaN	1	1	1	29.2	29.2	29.2	12.732	0	29.83	29830000	1	P41567	P41567	Eukaryotic translation initiation factor 1	EIF1	987
23.3764	26.6098	NaN	21.9069	NaN	NaN	NaN	23.451	NaN	16	8	8	36.2	21.5	21.5	75.491	0	49.167	263470000	22	P42166;P42167-3	P42166;P42167-3	Lamina-associated polypeptide 2, isoform alpha;Thymopoietin;Thymopentin;Lamina-associated polypeptide 2, isoforms beta/gamma;Thymopoietin;Thymopentin	TMPO	988
26.002	27.9436	26.387	24.4067	24.9154	23.2214	22.6215	25.2009	24.5815	20	20	12	45.8	45.8	23.3	50.67	0	235.52	1424600000	109	P42167;P42167-2	P42167;P42167-2	Lamina-associated polypeptide 2, isoforms beta/gamma;Thymopoietin;Thymopentin	TMPO	989
NaN	22.2897	NaN	23.8532	23.0923	21.7701	22.2899	23.3527	22.8787	5	5	5	11.1	11.1	11.1	83.042	0	43.11	241290000	14	P42224-2;P42224	P42224-2;P42224	Signal transducer and activator of transcription 1-alpha/beta	STAT1	990
23.3037	NaN	NaN	21.5976	NaN	21.6423	23.3449	NaN	21.4937	4	4	4	7.4	7.4	7.4	117.8	0	9.1828	100320000	9	P42285	P42285	Superkiller viralicidic activity 2-like 2	SKIV2L2	991
NaN	NaN	NaN	NaN	NaN	NaN	NaN	NaN	NaN	1	1	1	15.5	15.5	15.5	9.4771	0	27.387	358240000	29	Q71UM5;P42677	Q71UM5;P42677	40S ribosomal protein S27-like;40S ribosomal protein S27	RPS27L;RPS27	992
22.5204	NaN	NaN	NaN	NaN	NaN	22.3209	NaN	NaN	4	4	4	27.1	27.1	27.1	25.577	0	5.8203	48681000	10	P42696-2;P42696	P42696-2;P42696	RNA-binding protein 34	RBM34	993
21.5452	22.6079	NaN	22.0962	22.3239	22.5382	21.2897	22.7166	23.9739	10	10	10	9.2	9.2	9.2	157.9	0	21.929	249420000	24	P42704	P42704	Leucine-rich PPR motif-containing protein, mitochondrial	LRPPRC	994
NaN	NaN	NaN	NaN	NaN	23.3095	22.6369	NaN	NaN	2	2	2	22	22	22	14.551	0	55.076	294220000	20	P42766	P42766	60S ribosomal protein L35	RPL35	995
NaN	NaN	NaN	NaN	NaN	NaN	19.3778	NaN	NaN	1	1	1	2.4	2.4	2.4	55.799	0	8.1429	6282700	1	P42785;P42785-2	P42785;P42785-2	Lysosomal Pro-X carboxypeptidase	PRCP	996
24.9032	24.9579	23.532	26.849	25.554	23.7992	25.0304	28.2628	27.3349	15	15	15	28.9	28.9	28.9	87.021	0	323.31	3969100000	79	P42892-4;P42892-3;P42892;P42892-2	P42892-4;P42892-3;P42892;P42892-2	Endothelin-converting enzyme 1	ECE1	997
NaN	NaN	NaN	NaN	NaN	NaN	NaN	19.4017	NaN	1	1	1	2.4	2.4	2.4	55.148	0	3.6998	5595400	1	P43003-2;P43003	P43003-2;P43003	Excitatory amino acid transporter 1	SLC1A3	998
27.1343	29.0171	27.276	27.0959	28.2953	23.5954	22.3488	25.9803	24.7171	23	23	23	41.2	41.2	41.2	71.607	0	323.31	3124300000	147	P43121;P43121-2	P43121	Cell surface glycoprotein MUC18	MCAM	999
NaN	NaN	NaN	NaN	NaN	NaN	NaN	22.4164	NaN	4	4	4	13.1	13.1	13.1	70.857	0	9.0351	63268000	6	P43155;P43155-2;P43155-3	P43155;P43155-2;P43155-3	Carnitine O-acetyltransferase	CRAT	1000
28.3002	22.8589	21.6157	26.5098	18.9089	28.393	28.5825	24.4057	25.8121	26	26	26	37.3	37.3	37.3	94.622	0	323.31	5846500000	281	P43243;P43243-2	P43243;P43243-2	Matrin-3	MATR3	1001
NaN	NaN	NaN	NaN	21.4779	NaN	NaN	21.1846	NaN	2	2	2	2.8	2.8	2.8	104.74	0.00039825	2.572	59166000	6	P43246;P43246-2	P43246;P43246-2	DNA mismatch repair protein Msh2	MSH2	1002
23.8438	24.6013	24.3663	24.1793	23.6204	24.1911	24.0161	25.4131	25.9359	17	17	17	33.4	33.4	33.4	80.852	0	263.86	1035400000	48	P43304;P43304-2	P43304;P43304-2	Glycerol-3-phosphate dehydrogenase, mitochondrial	GPD2	1003
NaN	NaN	NaN	21.6634	NaN	NaN	NaN	20.4246	20.5559	1	1	1	6	6	6	20.135	0	3.9909	48408000	2	P43308	P43308	Translocon-associated protein subunit beta	SSR2	1004
NaN	NaN	NaN	21.5555	20.864	NaN	NaN	NaN	NaN	2	2	2	10.7	10.7	10.7	34.342	0	3.7896	18982000	3	P43355	P43355	Melanoma-associated antigen 1	MAGEA1	1005
22.0582	22.2454	22.0191	22.4057	22.2198	NaN	21.6316	22.3471	23.4821	2	2	2	9.5	9.5	9.5	23.239	0	18.07	188430000	11	P43487-2;P43487	P43487-2;P43487	Ran-specific GTPase-activating protein	RANBP1	1006
21.862	22.3398	NaN	23.695	22.3372	21.591	24.2173	26.2234	26.4475	16	16	16	43.2	43.2	43.2	55.52	0	94.064	1131300000	50	P43490	P43490	Nicotinamide phosphoribosyltransferase	NAMPT	1007
20.8939	NaN	NaN	21.3601	NaN	20.3156	NaN	22.1502	22.5622	7	7	7	30.5	30.5	30.5	43.507	0	16.135	114050000	9	P43686-2;P43686	P43686-2;P43686	26S protease regulatory subunit 6B	PSMC4	1008
NaN	NaN	NaN	NaN	NaN	NaN	NaN	NaN	20.3176	1	1	1	4.7	4.7	4.7	22.763	0	3.6637	14776000	3	P45877	P45877	Peptidyl-prolyl cis-trans isomerase C	PPIC	1009
22.8357	25.4883	24.8787	23.7605	24.5835	25.1655	23.4241	25.4733	25.0828	8	8	8	35.4	35.4	35.4	31.566	0	80.021	1068600000	70	P45880;P45880-2;P45880-1	P45880;P45880-2;P45880-1	Voltage-dependent anion-selective channel protein 2	VDAC2	1010
NaN	NaN	NaN	NaN	NaN	NaN	NaN	NaN	NaN	1	1	1	11.5	11.5	11.5	22.225	0.0028694	1.8606	29265000	1	P45973	P45973	Chromobox protein homolog 5	CBX5	1011
NaN	22.3051	22.1975	23.4092	21.8778	21.5352	22.0967	23.9219	24.4854	9	9	9	18.3	18.3	18.3	93.307	0	245.62	364350000	27	P45974-2;P45974	P45974-2;P45974	Ubiquitin carboxyl-terminal hydrolase 5	USP5	1012
NaN	NaN	NaN	NaN	NaN	NaN	NaN	21.5875	NaN	1	1	1	4.3	4.3	4.3	44.287	0.002847	1.8253	27209000	2	P45985;P45985-2	P45985;P45985-2	Dual specificity mitogen-activated protein kinase kinase 4	MAP2K4	1013
23.1878	NaN	NaN	NaN	NaN	NaN	NaN	NaN	NaN	5	5	5	3.1	3.1	3.1	319.44	0	3.9872	28766000	6	P46013-2;P46013	P46013-2;P46013	Antigen KI-67	MKI67	1014
22.9522	22.4269	NaN	24.6448	22.9306	22.461	22.9421	24.5378	24.1087	12	12	12	28.3	28.3	28.3	63.541	0	153.04	499630000	19	P46060	P46060	Ran GTPase-activating protein 1	RANGAP1	1015
25.6833	NaN	NaN	23.9448	22.2659	25.9662	25.7933	21.7931	24.2895	17	17	1	29.4	29.4	2.8	89.301	0	120.6	1116900000	97	P46087;P46087-4	P46087;P46087-4	Probable 28S rRNA (cytosine(4447)-C(5))-methyltransferase	NOP2	1016
NaN	NaN	NaN	NaN	NaN	NaN	20.9556	NaN	NaN	17	1	1	29.1	2.4	2.4	88.972	0.0014625	1.9799	32563000	3	P46087-2;P46087-3	P46087-2;P46087-3	Probable 28S rRNA (cytosine(4447)-C(5))-methyltransferase	NOP2	1017
NaN	NaN	NaN	NaN	NaN	NaN	NaN	NaN	NaN	1	1	1	1	1	1	269.81	0	6.5524	55074000	1	P46100-3;P46100	P46100-3;P46100	Transcriptional regulator ATRX	ATRX	1018
NaN	NaN	NaN	NaN	NaN	NaN	NaN	NaN	NaN	1	1	1	1.9	1.9	1.9	96.798	0.00079114	2.5175	79363000	6	P46379-4;P46379-5;P46379-2;P46379;P46379-3	P46379-4;P46379-5;P46379-2;P46379;P46379-3	Large proline-rich protein BAG6	BAG6	1019
NaN	22.4183	NaN	23.9662	23.0959	23.8361	NaN	23.3115	24.0439	12	12	12	28.7	28.7	28.7	71.583	0	80.377	396800000	34	P46459-2;P46459	P46459-2;P46459	Vesicle-fusing ATPase	NSF	1020
25.5138	23.7119	23.7261	23.6072	21.9391	26.6305	25.8707	23.6044	23.3625	7	7	7	39.9	39.9	39.9	16.561	0	36.27	1567400000	62	P46776	P46776	60S ribosomal protein L27a	RPL27A	1021
23.4526	21.7462	NaN	23.5827	21.3515	25.5242	24.7166	22.2771	22.7872	9	9	9	41.1	41.1	41.1	34.362	0	33.014	562500000	50	P46777	P46777	60S ribosomal protein L5	RPL5	1022
23.8029	22.6112	22.3027	22.6121	NaN	25.4269	24.5147	22.4432	21.4665	8	8	8	36.9	36.9	36.9	18.565	0	56.46	825610000	59	P46778	P46778	60S ribosomal protein L21	RPL21	1023
23.2985	NaN	NaN	22.3905	NaN	25.3704	23.7803	22.4901	22.4045	6	6	6	37.2	37.2	37.2	15.747	0	39.406	470630000	32	P46779;P46779-2;P46779-3;P46779-4;P46779-5	P46779;P46779-2;P46779-3;P46779-4;P46779-5	60S ribosomal protein L28	RPL28	1024
24.1606	23.0506	22.0854	22.5263	21.2542	26.1007	24.3659	22.8476	22.8829	13	13	13	43.8	43.8	43.8	22.591	0	67.162	883130000	58	P46781	P46781	40S ribosomal protein S9	RPS9	1025
24.5617	27.7168	24.7317	24.158	23.3761	24.8939	24.9691	27.5345	26.401	16	16	16	54.9	54.9	54.9	22.876	0	323.31	2905900000	168	P46782	P46782	40S ribosomal protein S5;40S ribosomal protein S5, N-terminally processed	RPS5	1026
22.7016	25.3476	24.8798	NaN	NaN	23.2987	NaN	25.1794	23.7369	6	6	6	40.6	40.6	40.6	18.898	0	34.065	734950000	67	P46783;Q9NQ39	P46783	40S ribosomal protein S10	RPS10	1027
23.732	22.6857	NaN	22.8585	22.8168	23.1252	23.5677	22.5873	22.6883	11	11	11	7.6	7.6	7.6	270.63	0	17.825	344390000	32	P46821	P46821	Microtubule-associated protein 1B;MAP1B heavy chain;MAP1 light chain LC1	MAP1B	1028
20.8536	NaN	NaN	NaN	NaN	NaN	NaN	NaN	NaN	1	1	1	8	8	8	36.232	0.00076104	2.1949	1894800	1	P46937-4;P46937-5;P46937-3;P46937-6;P46937-7;P46937-2;P46937-8;P46937;P46937-9	P46937-4;P46937-5;P46937-3;P46937-6;P46937-7;P46937-2;P46937-8;P46937;P46937-9	Transcriptional coactivator YAP1	YAP1	1029
24.9613	26.8628	25.4686	23.309	24.7553	25.1539	23.7574	25.6445	24.3774	29	29	29	22.6	22.6	22.6	189.25	0	151.95	1452500000	107	P46940;Q13576-3;Q13576-2;Q13576;Q86VI3	P46940	Ras GTPase-activating-like protein IQGAP1	IQGAP1	1030
NaN	NaN	23.8904	23.3264	NaN	23.6332	NaN	21.3127	22.8434	4	4	4	13.1	13.1	13.1	69.588	0	33.014	229480000	14	P46977-2;P46977	P46977-2;P46977	Dolichyl-diphosphooligosaccharide--protein glycosyltransferase subunit STT3A	STT3A	1031
NaN	NaN	NaN	22.8691	22.4404	22.5424	22.5322	23.1813	23.4187	6	3	3	28	20.3	20.3	32.949	0	323.31	264490000	33	P47755;P47755-2	P47755;P47755-2	F-actin-capping protein subunit alpha-2	CAPZA2	1032
24.9334	24.6373	23.2197	25.5083	25.2571	26.2738	24.3905	25.204	24.6405	10	10	10	45.6	45.6	45.6	30.628	0	299.83	1531600000	103	P47756-2;P47756	P47756-2;P47756	F-actin-capping protein subunit beta	CAPZB	1033
NaN	NaN	NaN	NaN	NaN	NaN	24.2131	24.0026	25.923	9	9	9	20.3	20.3	20.3	56.108	0	93.297	572780000	27	P47895	P47895	Aldehyde dehydrogenase family 1 member A3	ALDH1A3	1034
NaN	NaN	NaN	22.9837	NaN	22.9394	NaN	NaN	22.2765	7	7	7	16.2	16.2	16.2	86.578	0	89.982	118930000	11	P47897-2;P47897	P47897-2;P47897	Glutamine--tRNA ligase	QARS	1035
26.0607	28.2829	28.9733	25.7285	28.3721	25.7956	26.4506	26.4132	25.8602	15	15	15	63.8	63.8	63.8	23.277	0	323.31	4321600000	197	P48047	P48047	ATP synthase subunit O, mitochondrial	ATP5O	1036
NaN	NaN	NaN	19.7793	NaN	NaN	NaN	NaN	NaN	1	1	1	7.1	7.1	7.1	38.421	0	21.772	3749700	1	P48059-2	P48059-2			1037
NaN	NaN	NaN	24.6027	24.3772	NaN	23.221	26.5759	24.5226	8	8	8	43.6	43.6	43.6	30.366	0	323.31	969000000	52	P48060;P48060-2	P48060	Glioma pathogenesis-related protein 1	GLIPR1	1038
NaN	NaN	NaN	NaN	NaN	20.8428	NaN	NaN	20.6478	1	1	1	3.3	3.3	3.3	47.204	0.0068097	1.5373	51702000	3	P48444-2;P48444	P48444-2;P48444	Coatomer subunit delta	ARCN1	1039
21.2322	21.2137	NaN	22.8201	21.6855	NaN	21.1923	21.7271	22.2749	5	5	5	10.5	10.5	10.5	83.308	0	8.3751	112840000	9	P48449;P48449-3;P48449-2	P48449;P48449-3;P48449-2	Lanosterol synthase	LSS	1040
NaN	NaN	NaN	NaN	NaN	NaN	NaN	NaN	20.8883	2	2	2	10.7	10.7	10.7	28.135	0	3.5853	45099000	3	P48507-2;P48507	P48507-2;P48507	Glutamate--cysteine ligase regulatory subunit	GCLM	1041
NaN	NaN	NaN	23.2805	NaN	NaN	NaN	24.7335	22.679	5	5	5	30.8	30.8	30.8	28.295	0	114.13	269600000	22	P48509	P48509	CD151 antigen	CD151	1042
22.9576	NaN	NaN	NaN	NaN	22.1164	22.4565	NaN	NaN	4	4	4	4	4	4	227.84	0	5.909	59050000	7	P48634-2;P48634-3;P48634;P48634-4	P48634-2;P48634-3;P48634	Protein PRRC2A	PRRC2A	1043
NaN	22.3298	NaN	20.8204	20.8368	NaN	21.1477	NaN	NaN	3	3	3	9.6	9.6	9.6	40.349	0	4.2721	29858000	5	P48637-2;P48637	P48637-2;P48637	Glutathione synthetase	GSS	1044
23.795	22.9768	NaN	26.0605	NaN	24.8258	23.5615	24.054	24.9909	15	15	15	48.1	48.1	48.1	59.67	0	292.56	820910000	35	P48643;P48643-2	P48643;P48643-2	T-complex protein 1 subunit epsilon	CCT5	1045
NaN	NaN	NaN	NaN	NaN	NaN	NaN	NaN	NaN	1	1	1	3	3	3	55.527	0.00039872	2.5798	29773000	3	P48651	P48651	Phosphatidylserine synthase 1	PTDSS1	1046
NaN	NaN	NaN	NaN	NaN	NaN	23.4153	22.395	22.8987	6	6	6	8	8	8	177.44	0	13.139	150010000	16	P48681	P48681	Nestin	NES	1047
22.3168	23.3909	22.8363	23.4244	21.6708	21.5856	21.9358	25.1686	23.9275	4	3	3	15	12.8	12.8	45.179	0	7.8065	416240000	14	P48735-2;P48735	P48735-2;P48735	Isocitrate dehydrogenase [NADP], mitochondrial	IDH2	1048
NaN	23.1106	23.3162	23.8286	23.1004	21.8531	NaN	22.6297	23.0265	5	5	5	28.8	28.8	28.8	31.54	0	15.061	249580000	13	P48739;P48739-3;P48739-2	P48739;P48739-3;P48739-2	Phosphatidylinositol transfer protein beta isoform	PITPNB	1049
21.0723	24.5409	21.7978	25.0726	25.763	22.4965	22.0481	27.0728	25.2399	13	13	13	18.7	18.7	18.7	81.742	0	323.31	1604700000	77	P48960-2;P48960-3;P48960;Q9UHX3-4;Q9UHX3-6;Q9UHX3-3;Q9UHX3-2;Q9UHX3;Q9UHX3-5	P48960-2;P48960-3;P48960	CD97 antigen;CD97 antigen subunit alpha;CD97 antigen subunit beta	CD97	1050
NaN	NaN	NaN	NaN	NaN	NaN	NaN	NaN	20.502	1	1	1	3.6	3.6	3.6	51.289	0.00039841	2.5733	20241000	3	P49005	P49005	DNA polymerase delta subunit 2	POLD2	1051
NaN	NaN	NaN	NaN	NaN	NaN	NaN	NaN	20.7006	1	1	1	19	19	19	19.529	0	10.308	48268000	4	P49006	P49006	MARCKS-related protein	MARCKSL1	1052
NaN	NaN	NaN	NaN	NaN	NaN	NaN	20.5609	21.2515	2	2	2	10.6	10.6	10.6	60.966	0.0058339	1.5935	29742000	2	P49023-2;P49023-4;P49023;P49023-3	P49023-2;P49023-4;P49023;P49023-3	Paxillin	PXN	1053
NaN	NaN	NaN	NaN	NaN	NaN	NaN	22.4362	NaN	2	2	2	9.5	9.5	9.5	32.952	0	20.111	90777000	4	P49069	P49069	Calcium signal-modulating cyclophilin ligand	CAMLG	1054
NaN	NaN	NaN	NaN	NaN	NaN	NaN	19.9481	NaN	1	1	1	6	6	6	33.892	0.0034916	1.7043	6390200	1	P49184	P49184	Deoxyribonuclease-1-like 1	DNASE1L1	1055
NaN	NaN	NaN	NaN	NaN	NaN	NaN	NaN	18.4711	1	1	1	2.8	2.8	2.8	46.454	0.00076805	2.2798	9406200	3	P49189-2;P49189;P49189-3	P49189-2;P49189;P49189-3	4-trimethylaminobutyraldehyde dehydrogenase	ALDH9A1	1056
NaN	NaN	NaN	NaN	NaN	25.6335	NaN	NaN	NaN	3	3	3	21.4	21.4	21.4	13.293	0	14.534	457380000	18	P49207	P49207	60S ribosomal protein L34	RPL34	1057
23.5212	24.2413	24.6741	25.721	24.3322	25.5588	22.6419	23.0675	25.0105	9	9	9	27.1	27.1	27.1	57.548	0	63.756	833500000	29	P49257	P49257	Protein ERGIC-53	LMAN1	1058
21.5165	21.1256	21.2226	NaN	21.2759	20.8358	NaN	21.325	21.9456	3	3	3	13.1	13.1	13.1	48.804	0	4.9367	73608000	5	P49321-2;P49321;P49321-3;P49321-4	P49321-2;P49321;P49321-3;P49321-4	Nuclear autoantigenic sperm protein	NASP	1059
26.2054	26.1837	26.0437	27.8129	25.4967	24.559	25.7535	25.9843	26.9943	45	45	45	28.9	28.9	28.9	273.42	0	323.31	2878700000	141	P49327	P49327	Fatty acid synthase;[Acyl-carrier-protein] S-acetyltransferase;[Acyl-carrier-protein] S-malonyltransferase;3-oxoacyl-[acyl-carrier-protein] synthase;3-oxoacyl-[acyl-carrier-protein] reductase;3-hydroxyacyl-[acyl-carrier-protein] dehydratase;Enoyl-[acyl-carrier-protein] reductase;Oleoyl-[acyl-carrier-protein] hydrolase	FASN	1060
26.0762	25.0288	24.6638	27.7049	24.8764	25.8822	25.2651	26.3052	26.3304	23	23	23	44.4	44.4	44.4	60.533	0	222.39	2508800000	95	P49368;P49368-2	P49368;P49368-2	T-complex protein 1 subunit gamma	CCT3	1061
25.0047	25.1068	24.272	26.2118	25.3787	26.7205	24.9141	26.8527	27.5248	14	14	14	33.4	33.4	33.4	49.541	0	217.46	3426000000	102	P49411	P49411	Elongation factor Tu, mitochondrial	TUFM	1062
22.9415	25.2939	24.0913	22.4561	24.948	24.715	21.9993	22.7512	23.1976	4	4	4	30.5	30.5	30.5	9.1236	0	144.67	671340000	66	P49458-2;P49458	P49458-2;P49458	Signal recognition particle 9 kDa protein	SRP9	1063
NaN	NaN	NaN	NaN	NaN	NaN	NaN	NaN	20.9475	3	3	3	12.8	12.8	12.8	41.731	0.00075103	2.1143	43753000	2	P49585;Q9Y5K3-2;Q9Y5K3-4;Q9Y5K3-3;Q9Y5K3	P49585	Choline-phosphate cytidylyltransferase A	PCYT1A	1064
NaN	22.4536	22.0115	23.5365	23.0261	NaN	23.942	24.3335	24.8783	12	12	12	21.5	21.5	21.5	106.81	0	323.31	428650000	23	P49588;P49588-2	P49588;P49588-2	Alanine--tRNA ligase, cytoplasmic	AARS	1065
NaN	NaN	NaN	22.8978	NaN	NaN	NaN	NaN	NaN	4	4	4	6.1	6.1	6.1	82.845	0	5.9758	48705000	4	P49589-2;P49589;P49589-3	P49589-2;P49589;P49589-3	Cysteine--tRNA ligase, cytoplasmic	CARS	1066
NaN	NaN	NaN	22.547	NaN	NaN	NaN	NaN	NaN	4	4	4	9.1	9.1	9.1	58.777	0	4.5605	28910000	4	P49591	P49591	Serine--tRNA ligase, cytoplasmic	SARS	1067
NaN	NaN	NaN	NaN	NaN	NaN	NaN	NaN	21.6271	2	2	2	11.1	11.1	11.1	38.518	0	7.2136	21760000	3	P49593-2;P49593	P49593-2;P49593	Protein phosphatase 1F	PPM1F	1068
NaN	NaN	NaN	NaN	NaN	NaN	22.3483	NaN	NaN	2	2	2	3	3	3	82.785	0	229.23	38505000	5	P49711	P49711	Transcriptional repressor CTCF	CTCF	1069
23.9995	24.4373	24.633	24.3501	24.0402	24.3503	23.2015	23.5742	23.1968	11	11	11	22.1	22.1	22.1	68.058	0	126.07	557050000	40	P49748-2;P49748;P49748-3	P49748-2;P49748;P49748-3	Very long-chain specific acyl-CoA dehydrogenase, mitochondrial	ACADVL	1070
23.7642	NaN	NaN	22.3475	NaN	22.6615	23.8836	NaN	22.4821	8	8	8	9.3	9.3	9.3	209.48	0	14.614	192600000	12	P49750-3;P49750-1;P49750	P49750-3;P49750-1;P49750	YLP motif-containing protein 1	YLPM1	1071
22.9397	23.7255	23.8651	24.8048	23.5359	24.1491	24.1742	24.6214	24.1949	7	7	7	31.5	31.5	31.5	24.976	0	17.836	799090000	36	P49755	P49755	Transmembrane emp24 domain-containing protein 10	TMED10	1072
NaN	NaN	NaN	NaN	NaN	21.7865	NaN	NaN	NaN	2	2	2	5.7	5.7	5.7	100.18	0	4.2422	21275000	3	P49756;P49756-2;P49756-3	P49756;P49756-2;P49756-3	RNA-binding protein 25	RBM25	1073
NaN	NaN	NaN	NaN	NaN	NaN	NaN	NaN	20.9866	2	2	2	6	6	6	37.395	0.0064979	1.5665	29684000	4	P49757-9;P49757-8;P49757-7;P49757-6;P49757-5;P49757-4;P49757-2;P49757-3;P49757	P49757-9;P49757-8;P49757-7;P49757-6;P49757-5;P49757-4;P49757-2;P49757-3;P49757	Protein numb homolog	NUMB	1074
NaN	NaN	NaN	NaN	NaN	19.4786	NaN	NaN	NaN	2	2	2	6.9	6.9	6.9	56.206	0	2.7569	3719400	2	P49761-3;P49761-1;P49761	P49761-3;P49761-1;P49761	Dual specificity protein kinase CLK3	CLK3	1075
NaN	NaN	NaN	NaN	NaN	20.612	NaN	NaN	NaN	2	2	2	8.8	8.8	8.8	38.989	0	2.9714	26613000	2	P49770	P49770	Translation initiation factor eIF-2B subunit beta	EIF2B2	1076
23.6967	25.5008	24.557	23.1608	25.003	22.9548	24.0657	23.465	24.4678	4	4	4	55.6	55.6	55.6	13.802	0	61.33	576670000	25	P49773	P49773	Histidine triad nucleotide-binding protein 1	HINT1	1077
NaN	NaN	NaN	NaN	NaN	NaN	NaN	NaN	NaN	1	1	1	1.7	1.7	1.7	149.39	0.0041623	1.6642	12249000	1	P49790-2;P49790;P49790-3	P49790-2;P49790;P49790-3	Nuclear pore complex protein Nup153	NUP153	1078
21.4707	NaN	NaN	NaN	NaN	21.9795	NaN	NaN	NaN	5	5	5	2.3	2.3	2.3	358.2	0	3.179	34614000	5	P49792;A6NKT7;P0DJD0;P0DJD1;Q7Z3J3;Q99666;O14715;Q99666-2	P49792;A6NKT7	E3 SUMO-protein ligase RanBP2;RanBP2-like and GRIP domain-containing protein 3	RANBP2;RGPD3	1079
23.21	23.6382	22.8529	22.5537	22.6836	23.1407	22.5819	22.5348	22.0671	12	12	12	38	38	38	49.867	0	24.501	223850000	30	P49821-2;P49821	P49821-2;P49821	NADH dehydrogenase [ubiquinone] flavoprotein 1, mitochondrial	NDUFV1	1080
NaN	NaN	NaN	NaN	NaN	NaN	NaN	NaN	20.3375	1	1	1	4.7	4.7	4.7	35.479	0.0034904	1.7012	13037000	1	P49903-2;P49903-4;P49903	P49903-2;P49903-4;P49903	Selenide, water dikinase 1	SEPHS1	1081
23.6662	23.9855	22.9851	24.9402	24.006	24.216	23.6275	24.7254	26.0724	11	11	11	26.8	26.8	26.8	76.715	0	107.47	980230000	41	P49915;P49915-2	P49915;P49915-2	GMP synthase [glutamine-hydrolyzing]	GMPS	1082
NaN	NaN	NaN	NaN	NaN	21.9957	NaN	NaN	NaN	2	2	2	3.2	3.2	3.2	95.801	0	3.2941	21291000	1	P49916-4;P49916-3;P49916-2;P49916	P49916-4;P49916-3;P49916-2;P49916	DNA ligase 3	LIG3	1083
NaN	NaN	NaN	NaN	NaN	NaN	NaN	NaN	21.1433	1	1	1	29.4	29.4	29.4	6.0459	0	53.589	31060000	2	P50135-3;P50135-2;P50135	P50135-3;P50135-2;P50135	Histamine N-methyltransferase	HNMT	1084
NaN	NaN	NaN	NaN	NaN	NaN	NaN	18.5283	NaN	1	1	1	5.8	5.8	5.8	42.142	0	3.5009	17207000	2	P50148	P50148	Guanine nucleotide-binding protein G(q) subunit alpha	GNAQ	1085
25.5178	26.7111	24.6018	27.3457	27.8594	23.805	25.896	29.0858	27.5545	33	33	33	40.2	40.2	40.2	65.893	0	323.31	6311000000	246	P50281	P50281	Matrix metalloproteinase-14	MMP14	1086
23.9619	24.4835	23.9659	23.8089	23.5324	21.5463	24.0569	23.4448	25.4728	7	7	4	25.5	25.5	17.5	45.619	0	19.085	526800000	33	P50395-2;P50395	P50395-2;P50395	Rab GDP dissociation inhibitor beta	GDI2	1087
24.5255	25.5685	24.6281	24.8704	24.8557	24.0466	24.2924	24.7545	25.1195	5	5	5	36.6	36.6	36.6	28.994	0	323.31	955890000	65	P50402	P50402	Emerin	EMD	1088
22.7196	22.5903	22.7394	22.8697	22.7417	NaN	23.3574	22.914	23.8651	5	5	5	6.6	6.6	6.6	86.238	0	85.033	285460000	19	P50416-2;P50416	P50416-2;P50416	Carnitine O-palmitoyltransferase 1, liver isoform	CPT1A	1089
25.6736	26.0833	25.3417	28.8007	27.4475	29.5487	23.7347	26.7752	26.9517	28	28	28	66	66	66	46.44	0	323.31	8398800000	156	P50454	P50454	Serpin H1	SERPINH1	1090
24.024	22.1256	21.8048	25.0287	24.2591	26.8776	NaN	NaN	NaN	8	8	8	33.6	33.6	33.6	35.398	0	323.31	867900000	38	P50479;P50479-2	P50479;P50479-2	PDZ and LIM domain protein 4	PDLIM4	1091
NaN	NaN	NaN	NaN	NaN	NaN	NaN	NaN	20.7626	1	1	1	4.1	4.1	4.1	41.377	0.0014728	2.0113	19539000	1	Q8NFI4;P50502	Q8NFI4;P50502	Putative protein FAM10A5;Hsc70-interacting protein	ST13P5;ST13	1092
NaN	NaN	NaN	NaN	NaN	NaN	20.2174	NaN	NaN	1	1	1	4.2	4.2	4.2	49.964	0.00351	1.7504	23194000	3	P50548-2;P50548	P50548-2;P50548	ETS domain-containing transcription factor ERF	ERF	1093
22.3665	23.2145	22.0342	21.6791	23.2026	21.9203	22.0849	NaN	NaN	5	5	5	18.7	18.7	18.7	39.829	0	15.01	196360000	34	P50552	P50552	Vasodilator-stimulated phosphoprotein	VASP	1094
21.3657	22.2801	NaN	22.0057	22.8644	NaN	21.2714	23.3777	22.7147	5	5	5	8.3	8.3	8.3	97.553	0	48.094	184630000	19	P50570-3;P50570-2;P50570-5;P50570-4;P50570;Q9UQ16-2;Q9UQ16-3;Q9UQ16;Q9UQ16-4;Q9UQ16-5;Q05193-5;Q05193-3;Q05193-2;Q05193	P50570-3;P50570-2;P50570-5;P50570-4;P50570;Q9UQ16-2;Q9UQ16-3;Q9UQ16;Q9UQ16-4	Dynamin-2;Dynamin-3	DNM2;DNM3	1095
NaN	NaN	NaN	20.9722	NaN	NaN	NaN	NaN	NaN	2	2	2	7.9	7.9	7.9	50.496	0	2.8079	19064000	2	P50579-3;P50579-2;P50579	P50579-3;P50579-2;P50579	Methionine aminopeptidase 2	METAP2	1096
24.6045	25.2086	24.6332	24.234	23.9363	22.0626	NaN	22.009	NaN	8	8	8	17.2	17.2	17.2	67.404	0	34.646	263890000	31	P50895	P50895	Basal cell adhesion molecule	BCAM	1097
NaN	NaN	NaN	NaN	21.4552	NaN	NaN	NaN	NaN	1	1	1	9.9	9.9	9.9	23.093	0	5.4765	29931000	1	P50897-2;P50897	P50897-2;P50897	Palmitoyl-protein thioesterase 1	PPT1	1098
23.7494	21.3495	NaN	20.9787	NaN	24.2652	22.6894	NaN	21.5531	6	6	6	21.4	21.4	21.4	23.432	0	31.958	372180000	28	P50914	P50914	60S ribosomal protein L14	RPL14	1099
23.7421	24.0106	22.7965	25.8946	23.8729	24.1876	23.1633	24.0545	24.3786	13	13	13	31.4	31.4	31.4	59.62	0	72.532	777060000	42	P50990;P50990-2;P50990-3	P50990;P50990-2;P50990-3	T-complex protein 1 subunit theta	CCT8	1100
23.9326	24.2863	23.3802	26.3356	24.5249	24.6861	23.5237	25.0717	25.19	18	18	18	51	51	51	57.924	0	161.58	1123300000	72	P50991;P50991-2	P50991;P50991-2	T-complex protein 1 subunit delta	CCT4	1101
24.2252	24.5677	23.1511	24.2813	23.7224	21.9275	23.6024	24.9558	26.0726	10	10	10	25.2	25.2	25.2	51.242	0	42.014	819740000	24	P50995-2;P50995	P50995-2;P50995	Annexin A11	ANXA11	1103
24.1118	24.2049	NaN	22.0727	22.303	25.6331	23.4154	24.1124	23.7322	12	12	10	27.1	27.1	25	69.72	0	323.31	780400000	44	P51114;P51114-2;P51114-3	P51114;P51114-2;P51114-3	Fragile X mental retardation syndrome-related protein 1	FXR1	1104
NaN	21.3567	NaN	NaN	NaN	NaN	NaN	NaN	NaN	5	3	3	10.4	7.3	7.3	74.222	0	4.8689	137880000	9	P51116	P51116	Fragile X mental retardation syndrome-related protein 2	FXR2	1105
22.8773	23.2506	24.6469	24.9285	24.0993	24.6495	23.9059	24.2498	24.8624	5	5	4	40.7	40.7	36.1	23.482	0	138.84	750290000	30	P51148;P51148-2	P51148;P51148-2	Ras-related protein Rab-5C	RAB5C	1106
22.1093	22.9763	23.2528	23.6643	23.0317	23.8589	22.5188	22.2304	24.1303	5	5	5	27.5	27.5	27.5	23.489	0	103.29	359020000	20	P51149	P51149	Ras-related protein Rab-7a	RAB7A	1107
NaN	21.7532	NaN	NaN	NaN	NaN	NaN	22.0372	21.5844	1	1	1	10.4	10.4	10.4	22.837	0	2.6907	75188000	4	P51151	P51151	Ras-related protein Rab-9A	RAB9A	1108
23.624	23.1624	21.8465	25.0743	24.0147	23.6433	23.6742	24.483	24.2736	6	5	4	28.1	22.7	16.7	22.774	0	168.16	696170000	30	P51153;Q92930;P61006-2;P59190-2;P59190	P51153	Ras-related protein Rab-13	RAB13	1109
NaN	NaN	NaN	NaN	NaN	NaN	NaN	NaN	21.7921	1	1	1	9	9	9	16.162	0.001476	2.0199	36501000	1	P51452-2;P51452	P51452-2;P51452	Dual specificity protein phosphatase 3	DUSP3	1110
NaN	NaN	NaN	NaN	NaN	21.4253	NaN	NaN	NaN	5	2	2	3.9	2.4	2.4	179.28	0	2.8313	14338000	2	P51531-2;P51531	P51531-2;P51531	Probable global transcription activator SNF2L2	SMARCA2	1111
NaN	NaN	NaN	NaN	NaN	21.7826	NaN	NaN	NaN	5	5	2	4.1	4.1	2.6	181.26	0	8.8358	20383000	3	P51532-5;P51532-2;P51532-3;P51532-4;P51532	P51532-5;P51532-2;P51532-3;P51532-4;P51532	Transcription activator BRG1	SMARCA4	1112
22.8095	NaN	NaN	22.8669	22.8827	21.1918	22.2544	23.2354	23.4717	4	4	4	14.5	14.5	14.5	42.272	0	160.05	253410000	15	P51570;P51570-2	P51570;P51570-2	Galactokinase	GALK1	1113
22.0131	22.5786	22.6376	23.9422	23.9158	23.6493	21.6308	22.4341	22.5732	7	7	7	45.1	45.1	45.1	18.998	0	37.943	288350000	25	P51571	P51571	Translocon-associated protein subunit delta	SSR4	1114
NaN	21.7798	22.1396	22.0679	22.0399	22.4056	NaN	21.935	22.6966	2	2	2	15	15	15	27.991	0	13.473	131830000	11	P51572;P51572-2	P51572;P51572-2	B-cell receptor-associated protein 31	BCAP31	1115
NaN	NaN	NaN	NaN	NaN	19.9813	NaN	NaN	NaN	2	2	2	2.3	2.3	2.3	201.85	0	2.8084	5270200	2	P51610-2;P51610;P51610-3;P51610-4	P51610-2;P51610;P51610-3;P51610-4	Host cell factor 1;HCF N-terminal chain 1;HCF N-terminal chain 2;HCF N-terminal chain 3;HCF N-terminal chain 4;HCF N-terminal chain 5;HCF N-terminal chain 6;HCF C-terminal chain 1;HCF C-terminal chain 2;HCF C-terminal chain 3;HCF C-terminal chain 4;HCF C-terminal chain 5;HCF C-terminal chain 6	HCFC1	1116
NaN	NaN	NaN	NaN	NaN	NaN	NaN	NaN	19.9886	1	1	1	2.7	2.7	2.7	54.847	0	3.3703	31646000	1	P51648;P51648-2	P51648;P51648-2	Fatty aldehyde dehydrogenase	ALDH3A2	1117
24.008	24.5655	NaN	23.0391	23.1583	25.7993	23.5179	22.4544	23.8701	21	21	21	35.2	35.2	35.2	79.685	0	160.22	673930000	40	P51659;P51659-3;P51659-2	P51659;P51659-3;P51659-2	Peroxisomal multifunctional enzyme type 2;(3R)-hydroxyacyl-CoA dehydrogenase;Enoyl-CoA hydratase 2	HSD17B4	1118
NaN	NaN	NaN	20.3084	NaN	NaN	NaN	NaN	20.9799	2	2	2	11.4	11.4	11.4	37.025	0	23.328	32383000	4	P51665	P51665	26S proteasome non-ATPase regulatory subunit 7	PSMD7	1119
NaN	NaN	NaN	NaN	NaN	NaN	NaN	20.3612	NaN	1	1	1	1.1	1.1	1.1	88.463	0.006782	1.512	10655000	0	P51790-4;P51790;P51790-2	P51790-4;P51790;P51790-2	H(+)/Cl(-) exchange transporter 3	CLCN3	1120
22.5606	22.8767	NaN	22.2201	NaN	NaN	NaN	NaN	NaN	3	3	3	5.6	5.6	5.6	88.678	0	2.7895	73934000	5	P51798;P51798-2	P51798;P51798-2	H(+)/Cl(-) exchange transporter 7	CLCN7	1121
NaN	NaN	NaN	NaN	NaN	NaN	NaN	NaN	19.9748	4	1	1	2.7	1.1	1.1	207.7	0.009396	1.4553	28993000	3	P51805;O75051;Q9HCM2-4	P51805;O75051	Plexin-A3;Plexin-A2	PLXNA3;PLXNA2	1122
NaN	NaN	NaN	NaN	NaN	NaN	NaN	NaN	21.2164	2	2	2	4.6	4.6	4.6	83.735	0	3.9245	19965000	2	P51812	P51812	Ribosomal protein S6 kinase alpha-3	RPS6KA3	1123
NaN	NaN	NaN	NaN	NaN	NaN	23.5223	23.0951	23.1519	3	3	3	10	10	10	43.59	0	12.818	178860000	10	P51843-2;P51843	P51843-2;P51843	Nuclear receptor subfamily 0 group B member 1	NR0B1	1124
NaN	NaN	NaN	NaN	NaN	NaN	NaN	NaN	NaN	1	1	1	7.3	7.3	7.3	25.537	0	7.8351	201020000	3	P51858-2;P51858;P51858-3	P51858-2;P51858;P51858-3	Hepatoma-derived growth factor	HDGF	1125
NaN	NaN	NaN	NaN	NaN	NaN	NaN	NaN	22.8434	1	1	1	14.5	14.5	14.5	20.105	0	9.2578	97364000	4	P51970	P51970	NADH dehydrogenase [ubiquinone] 1 alpha subcomplex subunit 8	NDUFA8	1126
25.8864	NaN	NaN	22.7065	NaN	25.9334	25.7096	22.8061	23.5737	7	7	1	36	36	4.2	39.594	0	143.03	1023200000	52	P51991	P51991	Heterogeneous nuclear ribonucleoprotein A3	HNRNPA3	1127
NaN	NaN	NaN	NaN	NaN	NaN	NaN	NaN	NaN	7	1	1	37.4	3.7	3.7	37.029	0	2.8864	66900000	1	P51991-2	P51991-2	Heterogeneous nuclear ribonucleoprotein A3	HNRNPA3	1128
22.3944	22.7836	NaN	22.6212	NaN	NaN	22.4675	NaN	22.0539	4	4	4	15.1	15.1	15.1	51.872	0	22.576	85542000	10	P52209-2;P52209	P52209-2;P52209	6-phosphogluconate dehydrogenase, decarboxylating	PGD	1129
29.2422	27.2793	26.8433	27.8162	25.9986	30.2151	29.6494	27.4843	28.2405	43	43	43	64.3	64.3	64.3	73.62	0	323.31	19435000000	614	P52272-2;P52272	P52272-2;P52272	Heterogeneous nuclear ribonucleoprotein M	HNRNPM	1130
26.0826	26.8797	26.8136	26.6855	27.269	22.0764	25.0495	26.767	26.0338	18	18	18	38.9	38.9	38.9	57.861	0	323.31	2738600000	189	P52292	P52292	Importin subunit alpha-1	KPNA2	1131
NaN	NaN	NaN	NaN	NaN	NaN	NaN	21.8185	NaN	2	2	2	5.3	5.3	5.3	66.316	0	3.7139	48854000	2	P52306-4;P52306;P52306-5;P52306-6;P52306-2;P52306-3	P52306-4;P52306;P52306-5;P52306-6;P52306-2;P52306-3	Rap1 GTPase-GDP dissociation stimulator 1	RAP1GDS1	1132
25.575	24.352	23.6965	25.7446	24.5454	23.6509	25.8224	23.6229	27.4657	6	6	6	42.2	42.2	42.2	23.207	0	203.42	1624400000	28	P52565;P52565-2	P52565;P52565-2	Rho GDP-dissociation inhibitor 1	ARHGDIA	1133
23.1592	22.2705	22.2136	22.3216	21.2656	24.3743	23.7533	22.4084	24.0074	13	11	11	44.6	42.2	42.2	45.671	0	104.42	436730000	28	P52597	P52597	Heterogeneous nuclear ribonucleoprotein F;Heterogeneous nuclear ribonucleoprotein F, N-terminally processed	HNRNPF	1134
NaN	NaN	NaN	NaN	NaN	NaN	NaN	20.8257	NaN	2	2	2	4	4	4	120.56	0	5.9669	58900000	7	P52701-2;P52701-3;P52701;P52701-4	P52701-2;P52701-3;P52701;P52701-4	DNA mismatch repair protein Msh6	MSH6	1135
NaN	NaN	NaN	NaN	NaN	20.9344	20.5802	NaN	NaN	2	2	2	2	2	2	92.153	0.00075075	2.1094	16607000	2	P52756	P52756	RNA-binding protein 5	RBM5	1136
NaN	21.5037	21.312	22.1189	21.6332	22.1779	21.7466	23.8752	23.5114	9	7	7	14.1	12	12	102.38	0	20.693	294950000	14	P52789	P52789	Hexokinase-2	HK2	1137
21.7018	22.7027	22.5744	21.1203	NaN	NaN	NaN	24.2974	22.6548	6	6	5	31.2	31.2	23.1	36.923	0	41.509	218350000	19	P52799	P52799	Ephrin-B2	EFNB2	1138
NaN	21.7328	NaN	NaN	NaN	NaN	NaN	21.2626	22.3137	3	3	3	36.9	36.9	36.9	21.348	0	34.486	91667000	9	P52815	P52815	39S ribosomal protein L12, mitochondrial	MRPL12	1139
NaN	NaN	NaN	NaN	NaN	NaN	NaN	20.8505	NaN	1	1	1	2.3	2.3	2.3	78.839	0.0011244	2.1019	48359000	3	P52888	P52888	Thimet oligopeptidase	THOP1	1140
NaN	NaN	NaN	NaN	NaN	NaN	NaN	NaN	22.5791	7	2	2	34.4	9	9	36.735	0	6.6635	46571000	2	P52895;P52895-2	P52895;P52895-2	Aldo-keto reductase family 1 member C2	AKR1C2	1141
25.9374	25.2532	23.9985	26.0794	25.7315	26.387	24.7663	24.8854	25.2558	12	12	9	54.9	54.9	50.7	32.922	0	228.11	1885300000	95	P52907	P52907	F-actin-capping protein subunit alpha-1	CAPZA1	1142
NaN	NaN	NaN	NaN	NaN	NaN	NaN	NaN	NaN	1	1	1	7.7	7.7	7.7	22.492	0.0093834	1.4401	7245900	3	P52943;P52943-2	P52943;P52943-2	Cysteine-rich protein 2	CRIP2	1143
23.0037	NaN	NaN	NaN	NaN	22.8523	22.0505	NaN	NaN	8	8	8	7.4	7.4	7.4	195.82	0	14.838	103200000	14	P52948-5;P52948;P52948-6;P52948-2;P52948-4;P52948-3	P52948-5;P52948;P52948-6;P52948-2	Nuclear pore complex protein Nup98-Nup96;Nuclear pore complex protein Nup98;Nuclear pore complex protein Nup96	NUP98	1144
NaN	NaN	NaN	NaN	NaN	NaN	NaN	NaN	20.2746	2	2	2	7.7	7.7	7.7	34.012	0.00039904	2.586	44817000	3	P53007	P53007	Tricarboxylate transport protein, mitochondrial	SLC25A1	1145
NaN	NaN	NaN	NaN	NaN	NaN	NaN	NaN	NaN	1	1	1	6	6	6	68.254	0	5.5556	78115000	3	P53350	P53350	Serine/threonine-protein kinase PLK1	PLK1	1146
NaN	NaN	NaN	22.1537	NaN	NaN	NaN	22.2195	22.052	3	3	1	15	15	4.3	41.738	0	15.774	104730000	12	P53367;P53367-3	P53367	Arfaptin-1	ARFIP1	1147
NaN	NaN	NaN	NaN	NaN	NaN	NaN	21.243	NaN	3	1	1	22.6	10.9	10.9	38.598	0	3.4962	15679000	1	P53367-2	P53367-2	Arfaptin-1	ARFIP1	1148
NaN	NaN	NaN	NaN	NaN	NaN	NaN	NaN	19.2081	1	1	1	5.8	5.8	5.8	33.412	0	2.6461	9891800	3	P53384-2;P53384	P53384-2;P53384	Cytosolic Fe-S cluster assembly factor NUBP1	NUBP1	1149
26.0801	26.8722	25.3911	28.6322	26.1134	25.5397	26.1558	27.138	27.6474	39	39	39	40	40	40	120.84	0	323.31	4945700000	208	P53396;P53396-2;P53396-3	P53396;P53396-2;P53396-3	ATP-citrate synthase	ACLY	1150
NaN	NaN	NaN	NaN	NaN	NaN	NaN	NaN	22.046	3	3	3	18.9	18.9	18.9	43.215	0.00077131	2.3116	58695000	3	P53582	P53582	Methionine aminopeptidase 1	METAP1	1151
NaN	NaN	NaN	NaN	NaN	NaN	NaN	NaN	20.6601	1	1	1	3.2	3.2	3.2	43.404	0	3.6965	10515000	0	P53602	P53602	Diphosphomevalonate decarboxylase	MVD	1152
NaN	NaN	NaN	NaN	NaN	NaN	NaN	NaN	22.284	1	1	1	6.3	6.3	6.3	36.924	0	2.63	32406000	1	P53611	P53611	Geranylgeranyl transferase type-2 subunit beta	RABGGTB	1153
NaN	NaN	NaN	20.8647	NaN	20.6403	NaN	21.4798	NaN	2	2	2	4.1	4.1	4.1	107.14	0	5.6925	41533000	4	P53618	P53618	Coatomer subunit beta	COPB1	1154
23.0651	22.9412	NaN	24.0433	23.3294	24.2974	23.0234	24.3594	23.0505	17	17	17	22.9	22.9	22.9	138.34	0	43.397	575770000	29	P53621;P53621-2	P53621;P53621-2	Coatomer subunit alpha;Xenin;Proxenin	COPA	1155
NaN	NaN	NaN	NaN	NaN	NaN	NaN	NaN	21.0885	1	1	1	13.4	13.4	13.4	33.372	0	5.5177	17039000	2	P53667-3;P53667-4;P53667-2;P53667	P53667-3;P53667-4;P53667-2;P53667	LIM domain kinase 1	LIMK1	1156
NaN	NaN	NaN	NaN	NaN	NaN	NaN	NaN	NaN	1	1	1	9.6	9.6	9.6	12.417	0.002846	1.8241	5094000	2	P53680-2;P53680	P53680-2;P53680	AP-2 complex subunit sigma	AP2S1	1157
NaN	NaN	21.0978	22.4561	NaN	22.0975	NaN	NaN	21.5591	2	2	2	13.4	13.4	13.4	30.601	0	3.2911	74169000	6	P53701	P53701	Cytochrome c-type heme lyase	HCCS	1158
23.5341	23.9272	NaN	23.1948	22.8156	NaN	NaN	23.7607	NaN	3	3	3	18.9	18.9	18.9	20.324	0	23.973	197480000	16	P53801	P53801	Pituitary tumor-transforming gene 1 protein-interacting protein	PTTG1IP	1159
NaN	NaN	NaN	NaN	20.8614	NaN	NaN	NaN	20.499	2	2	2	5	5	5	98.918	0	5.6635	21750000	3	P53814-5;P53814;P53814-6	P53814-5;P53814;P53814-6	Smoothelin	SMTN	1160
21.9476	NaN	NaN	21.9911	NaN	22.5573	21.8287	21.9152	21.7447	4	4	4	6.9	6.9	6.9	118.32	0	21.013	110100000	10	P53992;P53992-2	P53992	Protein transport protein Sec24C	SEC24C	1161
26.4019	24.0904	23.5623	24.8463	23.2386	25.9878	25.5646	NaN	23.3597	9	9	9	59.8	59.8	59.8	14.395	0	303.29	1340100000	64	P53999	P53999	Activated RNA polymerase II transcriptional coactivator p15	SUB1	1162
NaN	NaN	NaN	21.4508	NaN	NaN	NaN	NaN	20.9004	3	3	3	29.1	29.1	29.1	26.215	0	9.6117	30394000	7	P54105	P54105	Methylosome subunit pICln	CLNS1A	1163
21.8851	22.281	NaN	23.6012	22.808	23.287	21.5728	21.145	21.2719	10	10	10	20.2	20.2	20.2	75.378	0	29.883	201190000	23	P54136;P54136-2	P54136;P54136-2	Arginine--tRNA ligase, cytoplasmic	RARS	1164
25.4198	25.5396	25.6588	NaN	NaN	NaN	22.5757	25.025	23.3324	12	12	12	17.7	17.7	17.7	121.89	0	65.681	426190000	45	P54289-4;P54289-5;P54289;P54289-3;P54289-2	P54289-4;P54289-5;P54289;P54289-3;P54289-2	Voltage-dependent calcium channel subunit alpha-2/delta-1;Voltage-dependent calcium channel subunit alpha-2-1;Voltage-dependent calcium channel subunit delta-1	CACNA2D1	1165
23.2152	24.3801	24.7395	27.5042	25.31	23.7054	24.4076	24.0259	24.7466	11	11	11	25.9	25.9	25.9	59.143	0	63.065	1318300000	46	P54577	P54577	Tyrosine--tRNA ligase, cytoplasmic;Tyrosine--tRNA ligase, cytoplasmic, N-terminally processed	YARS	1166
NaN	NaN	NaN	NaN	NaN	NaN	NaN	NaN	21.5294	2	2	2	5.9	5.9	5.9	52.385	0	4.7852	23354000	2	P54578-2;P54578-3;P54578	P54578-2;P54578-3;P54578	Ubiquitin carboxyl-terminal hydrolase 14	USP14	1167
NaN	NaN	NaN	NaN	NaN	NaN	NaN	NaN	20.7121	1	1	1	2.6	2.6	2.6	42.837	0.0014631	1.9804	24229000	1	P54687-4;P54687;P54687-5	P54687-4;P54687;P54687-5	Branched-chain-amino-acid aminotransferase, cytosolic	BCAT1	1168
24.2204	25.2075	24.5842	26.652	26.1223	23.8391	24.0065	26.7361	25.2213	11	11	11	43	43	43	31.512	0	50.546	1866400000	78	P54709;P54709-2	P54709;P54709-2	Sodium/potassium-transporting ATPase subunit beta-3	ATP1B3	1169
NaN	NaN	NaN	22.4747	NaN	NaN	NaN	NaN	NaN	6	4	3	9.7	7.4	6.1	107.7	0	9.6287	36701000	9	P54756-3;P54756-2;P54756;P29320	P54756-3;P54756-2;P54756;P29320	Ephrin type-A receptor 5;Ephrin type-A receptor 3	EPHA5;EPHA3	1170
NaN	NaN	NaN	22.6402	NaN	NaN	NaN	NaN	NaN	7	4	4	8.7	6.8	6.8	108.27	0	17.897	66625000	9	P54760;P54760-2;P54760-4;P54760-3	P54760;P54760-2	Ephrin type-B receptor 4	EPHB4	1171
NaN	NaN	NaN	22.1889	NaN	NaN	NaN	NaN	NaN	4	2	2	5.8	3.3	3.3	109.86	0	4.7315	32605000	4	P54764;P54764-2	P54764;P54764-2	Ephrin type-A receptor 4	EPHA4	1172
21.7198	19.5848	NaN	23.1504	21.9916	26.5193	21.442	20.5787	27.1882	19	19	19	63.8	63.8	63.8	25.614	0	323.31	1485000000	61	P54819-2;P54819;P54819-5;P54819-6;P54819-3;P54819-4	P54819-2;P54819;P54819-5;P54819-6;P54819-3	Adenylate kinase 2, mitochondrial;Adenylate kinase 2, mitochondrial, N-terminally processed	AK2	1173
NaN	21.1343	NaN	21.4828	21.1916	NaN	NaN	NaN	NaN	2	2	2	8.4	8.4	8.4	35.693	0	7.0967	20195000	3	P54826	P54826	Growth arrest-specific protein 1	GAS1	1174
NaN	21.8636	NaN	22.6781	NaN	22.4804	21.9259	22.2544	22.59	5	5	5	7.7	7.7	7.7	87.088	0	29.552	169660000	10	P54886-2;P54886	P54886-2;P54886	Delta-1-pyrroline-5-carboxylate synthase;Glutamate 5-kinase;Gamma-glutamyl phosphate reductase	ALDH18A1	1175
NaN	NaN	NaN	22.1617	NaN	21.786	NaN	23.2631	23.3784	5	5	5	28.1	28.1	28.1	33.232	0	166.59	178500000	11	P54920;Q9H115-3;Q9H115-2;Q9H115	P54920	Alpha-soluble NSF attachment protein	NAPA	1176
NaN	NaN	NaN	NaN	NaN	NaN	NaN	NaN	20.4491	2	2	2	6.5	6.5	6.5	49.222	0	2.9137	17627000	3	P55010	P55010	Eukaryotic translation initiation factor 5	EIF5	1177
21.4725	NaN	21.6368	23.1681	NaN	21.491	NaN	21.5091	NaN	4	4	4	5.3	5.3	5.3	129.68	0	17.308	98589000	5	P55011-3;P55011	P55011-3;P55011	Solute carrier family 12 member 2	SLC12A2	1178
27.2312	27.9897	28.2289	28.2595	27.6466	24.3191	27.6607	27.9685	27.1042	10	10	10	13.9	13.9	13.9	103.88	0	323.31	4313800000	99	P55060-4;P55060-3;P55060;P55060-2	P55060-4;P55060-3;P55060	Exportin-2	CSE1L	1179
22.8788	21.8854	21.5425	22.5524	22.4892	25.1926	22.5152	NaN	24.2938	12	12	12	24.4	24.4	24.4	89.321	0	67.334	440430000	23	P55072	P55072	Transitional endoplasmic reticulum ATPase	VCP	1180
23.2169	NaN	NaN	NaN	NaN	22.4802	23.4933	NaN	22.1037	5	5	5	17.3	17.3	17.3	51.958	0	11.193	167730000	14	P55081	P55081	Microfibrillar-associated protein 1	MFAP1	1181
25.1535	24.8433	23.7776	24.2942	24.1457	24.9176	25.149	24.7645	25.0314	11	11	11	33.8	33.8	33.8	48.879	0	82.256	998390000	66	P55084-2;P55084	P55084-2;P55084	Trifunctional enzyme subunit beta, mitochondrial;3-ketoacyl-CoA thiolase	HADHB	1182
NaN	NaN	NaN	NaN	NaN	22.2353	NaN	NaN	23.9087	2	2	2	20.3	20.3	20.3	20.7	0	2.5898	154410000	3	P55145	P55145	Mesencephalic astrocyte-derived neurotrophic factor	MANF	1183
23.888	23.5993	22.1225	24.6425	24.062	25.2735	22.8258	23.5447	23.2473	9	9	7	27.6	27.6	25.1	45.374	0	323.31	684720000	41	P55209;P55209-2;P55209-3	P55209;P55209-2;P55209-3	Nucleosome assembly protein 1-like 1	NAP1L1	1184
NaN	NaN	NaN	NaN	NaN	NaN	NaN	NaN	NaN	1	1	1	3.6	3.6	3.6	28.03	0.0031802	1.7975	106500000	5	P55210-2	P55210-2			1185
NaN	NaN	NaN	NaN	NaN	NaN	NaN	NaN	21.9291	1	1	1	6.5	6.5	6.5	33.31	0	69.641	27073000	2	P55212	P55212	Caspase-6;Caspase-6 subunit p18;Caspase-6 subunit p11	CASP6	1186
NaN	NaN	NaN	NaN	NaN	NaN	NaN	NaN	22.7554	1	1	1	4.6	4.6	4.6	34.084	0.00077101	2.3098	68507000	3	P55263-3;P55263-4;P55263-2;P55263	P55263-3;P55263-4;P55263-2;P55263	Adenosine kinase	ADK	1187
NaN	NaN	NaN	NaN	NaN	NaN	NaN	NaN	NaN	9	1	1	13.8	1.9	1.9	133.27	0	4.5251	27291000	1	P55265-2;P55265-3	P55265-2;P55265-3	Double-stranded RNA-specific adenosine deaminase	ADAR	1188
25.443	NaN	NaN	22.6555	NaN	26.0309	24.9737	22.2182	23.4149	12	12	4	21.6	21.6	6.3	103.64	0	76.673	846720000	57	P55265-5;P55265;P55265-4	P55265-5;P55265;P55265-4	Double-stranded RNA-specific adenosine deaminase	ADAR	1189
NaN	NaN	NaN	23.161	24.7044	NaN	NaN	NaN	NaN	4	4	4	12.3	12.3	12.3	87.964	0	8.1063	104170000	7	P55287;P55287-2	P55287;P55287-2	Cadherin-11	CDH11	1190
24.6998	23.4886	24.8961	28.6303	26.8975	22.6293	27.2978	28.2868	27.6223	15	15	15	21.2	21.2	21.2	78.286	0	323.31	5574900000	121	P55290;P55290-4;P55290-5;P55290-3;P55290-2	P55290;P55290-4;P55290-5;P55290-3;P55290-2	Cadherin-13	CDH13	1191
NaN	NaN	NaN	NaN	NaN	NaN	NaN	NaN	23.4885	1	1	1	8.1	8.1	8.1	35.54	0	277.13	332460000	8	P55735	P55735	Protein SEC13 homolog	SEC13	1192
21.0224	NaN	NaN	21.6164	NaN	24.5543	21.1674	NaN	NaN	7	7	7	55.5	55.5	55.5	14.173	0	145.4	179000000	18	P55769	P55769	NHP2-like protein 1;NHP2-like protein 1, N-terminally processed	NHP2L1	1193
22.5766	23.0803	22.8498	22.5543	NaN	NaN	22.0706	23.4334	24.1724	7	7	7	14.3	14.3	14.3	103.28	0	17.786	302510000	15	P55786;P55786-2;A6NEC2;A6NEC2-2	P55786;P55786-2	Puromycin-sensitive aminopeptidase	NPEPPS	1194
NaN	NaN	NaN	NaN	NaN	NaN	NaN	NaN	20.3541	1	1	1	12.2	12.2	12.2	23.449	0	2.8781	9257400	1	P55789	P55789	FAD-linked sulfhydryl oxidase ALR	GFER	1195
21.4781	20.9393	NaN	21.1415	NaN	23.3723	21.5345	21.2467	22.1169	13	5	5	33.2	15.1	15.1	49.263	0	106.09	146800000	21	P55795	P55795	Heterogeneous nuclear ribonucleoprotein H2	HNRNPH2	1196
NaN	NaN	NaN	NaN	NaN	19.9772	NaN	NaN	NaN	3	3	3	5.7	5.7	5.7	92.48	0.00076894	2.2862	26193000	2	P55884;P55884-2	P55884;P55884-2	Eukaryotic translation initiation factor 3 subunit B	EIF3B	1197
NaN	21.4478	22.2155	23.8134	22.1713	21.6742	21.6224	22.214	24.42	2	2	2	19.9	19.9	19.9	26.836	0	52.225	271390000	10	P55957-2;P55957;P55957-3	P55957-2;P55957;P55957-3	BH3-interacting domain death agonist;BH3-interacting domain death agonist p15;BH3-interacting domain death agonist p13;BH3-interacting domain death agonist p11	BID	1198
22.8173	23.6031	23.3192	23.5453	24.0879	23.0101	22.9112	23.4154	23.2679	5	5	5	81.8	81.8	81.8	6.2953	0	41.792	396190000	36	P56134-3;P56134;P56134-4;P56134-2	P56134-3;P56134;P56134-4;P56134-2	ATP synthase subunit f, mitochondrial	ATP5J2	1199
22.4092	22.8402	23.1739	NaN	NaN	NaN	NaN	NaN	NaN	3	3	3	7.4	7.4	7.4	50.838	0	14.555	29296000	9	P56159-2;P56159	P56159-2;P56159	GDNF family receptor alpha-1	GFRA1	1200
23.0265	22.7002	22.7666	NaN	NaN	22.6699	22.6905	NaN	NaN	3	3	3	14.4	14.4	14.4	50.983	0	3.0416	123980000	6	P56181-2;P56181	P56181-2	NADH dehydrogenase [ubiquinone] flavoprotein 3, mitochondrial	NDUFV3	1201
22.8189	NaN	NaN	22.2265	NaN	23.8222	22.7975	NaN	21.6881	4	4	4	18	18	18	52.839	0	24.179	152260000	14	P56182	P56182	Ribosomal RNA processing protein 1 homolog A	RRP1	1202
22.6575	23.0473	NaN	23.8615	22.8061	22.7572	22.9605	23.2581	22.9502	5	5	5	9.3	9.3	9.3	101.11	0	15.572	284420000	16	P56192;P56192-2	P56192;P56192-2	Methionine--tRNA ligase, cytoplasmic	MARS	1203
21.943	21.4671	NaN	21.7546	NaN	NaN	23.0972	21.7706	22.4992	2	2	2	26.5	26.5	26.5	7.7469	0	15.492	115310000	9	P56277	P56277	Cx9C motif-containing protein 4	CMC4	1204
23.2904	24.6141	25.2038	25.3574	24.8565	24.2323	23.0142	24.6929	24.0221	3	3	3	34.8	34.8	34.8	7.9331	0	84.323	754100000	40	P56385	P56385	ATP synthase subunit e, mitochondrial	ATP5I	1205
23.0172	22.6222	NaN	23.3648	23.1285	24.5101	23.2698	22.6224	24.5819	8	8	8	55.9	55.9	55.9	26.599	0	121.63	557490000	42	P56537;P56537-2	P56537	Eukaryotic translation initiation factor 6	EIF6	1206
NaN	22.8528	22.9417	NaN	NaN	21.8433	NaN	NaN	NaN	1	1	1	12.5	12.5	12.5	15.136	0.0011136	2.053	123970000	5	P56556	P56556	NADH dehydrogenase [ubiquinone] 1 alpha subcomplex subunit 6	NDUFA6	1207
NaN	NaN	NaN	NaN	NaN	NaN	NaN	20.1277	NaN	1	1	1	6.1	6.1	6.1	27.11	0.0014766	2.0226	10879000	2	P56749	P56749	Claudin-12	CLDN12	1208
NaN	NaN	NaN	NaN	NaN	NaN	NaN	23.7393	22.5705	3	3	3	16	16	16	29.037	0	109.31	136500000	10	P57087-2;P57087;P57087-3	P57087-2;P57087;P57087-3	Junctional adhesion molecule B	JAM2	1209
NaN	21.9543	NaN	20.822	21.6942	21.935	21.9812	21.7667	NaN	1	1	1	2.2	2.2	2.2	114.16	0	5.057	106850000	10	P57737-3;Q9Y3D7	P57737-3;Q9Y3D7	Mitochondrial import inner membrane translocase subunit TIM16	PAM16	1210
23.6843	NaN	NaN	NaN	NaN	22.692	23.1569	NaN	21.7445	9	9	9	18.3	18.3	18.3	106.37	0	60.049	136340000	18	P57740;P57740-2;P57740-3	P57740;P57740-2	Nuclear pore complex protein Nup107	NUP107	1211
NaN	NaN	NaN	NaN	NaN	18.5226	NaN	NaN	NaN	1	1	1	6.3	6.3	6.3	38.561	0.0067797	1.5117	1917300	1	P58166	P58166	Inhibin beta E chain	INHBE	1212
19.7403	20.4823	NaN	21.9331	20.4611	NaN	22.2882	28.115	26.086	7	7	5	20.5	20.5	17.1	42.892	0	173.51	2217400000	43	P58335-2;P58335-4;P58335;P58335-3	P58335-2;P58335-4;P58335;P58335-3	Anthrax toxin receptor 2	ANTXR2	1213
NaN	22.5833	22.9984	NaN	NaN	NaN	NaN	22.907	23.5768	2	2	2	20.3	20.3	20.3	12.895	0	24.497	187760000	9	P58546	P58546	Myotrophin	MTPN	1214
NaN	NaN	NaN	NaN	NaN	NaN	NaN	NaN	NaN	1	1	1	1.1	1.1	1.1	118.96	0.0067981	1.527	25533000	1	P59923	P59923	Zinc finger protein 445	ZNF445	1215
NaN	22.4166	NaN	22.7466	NaN	22.0031	22.1918	22.1237	22.779	5	5	5	36.9	36.9	36.9	19.667	0	16.415	206070000	15	P59998;P59998-2;P59998-3;P59998-4	P59998;P59998-2;P59998-3	Actin-related protein 2/3 complex subunit 4	ARPC4	1216
22.5941	23.6577	NaN	25.7193	25.1841	21.9503	21.4043	25.3822	23.3703	5	5	5	21.2	21.2	21.2	25.809	0	323.31	707020000	39	P60033	P60033	CD81 antigen	CD81	1217
NaN	NaN	NaN	24.8489	21.1615	24.3816	22.4003	23.41	23.1441	3	3	3	29.4	29.4	29.4	7.7412	0	250.38	494030000	36	P60059	P60059	Protein transport protein Sec61 subunit gamma	SEC61G	1218
23.9444	26.75	25.4296	23.851	24.8247	22.9785	24.1499	24.7891	27.0637	15	15	15	57.3	57.3	57.3	30.791	0	156.08	1286200000	72	P60174;P60174-1;P60174-4	P60174;P60174-1;P60174-4	Triosephosphate isomerase	TPI1	1219
NaN	NaN	NaN	NaN	NaN	NaN	NaN	21.9182	NaN	3	3	3	40.6	40.6	40.6	9.9743	0	11.365	49052000	6	P60468	P60468	Protein transport protein Sec61 subunit beta	SEC61B	1220
NaN	NaN	NaN	NaN	NaN	NaN	NaN	NaN	21.5588	1	1	1	4.9	4.9	4.9	35.08	0	3.1456	30327000	1	P60510	P60510	Serine/threonine-protein phosphatase 4 catalytic subunit	PPP4C	1221
NaN	NaN	NaN	NaN	NaN	20.5689	NaN	NaN	NaN	17	1	1	85.4	23.8	23.8	16.93	0	85.715	60227000	6	P60660	P60660	Myosin light polypeptide 6	MYL6	1222
28.0418	28.6333	28.7067	28.2159	26.8254	28.518	27.334	27.7623	28.2471	18	18	2	85.4	85.4	23.8	16.961	0	323.31	23220000000	435	P60660-2	P60660-2	Myosin light polypeptide 6	MYL6	1223
31.352	30.7287	30.4688	31.1909	30.8487	32.2877	31.0116	31.7068	32.1513	44	44	2	95.7	95.7	7.2	41.736	0	323.31	180310000000	1757	P60709;Q6S8J3;A5A3E0;P0CG38;Q9BYX7;P0CG39	P60709	Actin, cytoplasmic 1;Actin, cytoplasmic 1, N-terminally processed	ACTB	1224
25.7405	26.2346	25.9662	26.7831	26.5872	24.7447	25.6458	27.0247	27.4928	21	21	20	60.6	60.6	56.7	46.153	0	323.31	3381500000	168	P60842;P60842-2;Q14240;Q14240-2	P60842;P60842-2	Eukaryotic initiation factor 4A-I	EIF4A1	1225
24.5762	26.9023	25.5473	24.718	24.48	25.2184	23.852	27.2882	25.7458	7	7	7	46.2	46.2	46.2	13.373	0	59.872	2864000000	57	P60866;P60866-2	P60866;P60866-2	40S ribosomal protein S20	RPS20	1226
NaN	NaN	NaN	20.2715	NaN	19.3177	NaN	NaN	22.0583	3	1	1	18.7	7.6	7.6	27.526	0.0014545	1.9519	42962000	2	P60891-2;P60891	P60891-2;P60891	Ribose-phosphate pyrophosphokinase 1	PRPS1	1227
NaN	NaN	NaN	NaN	NaN	NaN	NaN	NaN	20.2164	2	2	2	12.6	12.6	12.6	27.399	0.00077882	2.4072	19658000	1	P60900;P60900-2;P60900-3	P60900;P60900-2;P60900-3	Proteasome subunit alpha type-6	PSMA6	1228
21.7505	26.2686	23.2826	24.9849	25.3804	23.1925	21.2509	25.9665	25.8422	4	4	4	54.6	54.6	54.6	11.203	0	75.841	1439500000	36	P60903	P60903	Protein S100-A10	S100A10	1229
NaN	23.2067	23.4454	23.9269	NaN	23.5803	22.3284	23.5509	23.8453	7	7	7	31.9	31.9	31.9	21.258	0	45.297	387690000	39	P60953;P60953-1	P60953	Cell division control protein 42 homolog	CDC42	1230
22.8707	23.5738	22.3027	23.5718	25.0999	23.0787	21.5865	23.8657	23.9637	10	9	9	57	49.7	49.7	18.506	0	125.58	410580000	53	P60981;P60981-2	P60981;P60981-2	Destrin	DSTN	1231
NaN	NaN	NaN	NaN	NaN	NaN	NaN	NaN	NaN	2	1	1	12.1	6.8	6.8	23.668	0	5.5189	66282000	3	P61006	P61006	Ras-related protein Rab-8A	RAB8A	1232
NaN	NaN	NaN	NaN	NaN	NaN	NaN	NaN	20.5043	2	2	2	8.3	8.3	8.3	20.313	0	2.9827	39095000	1	P61009	P61009	Signal peptidase complex subunit 3	SPCS3	1233
NaN	24.0966	23.5393	23.7922	24.7348	23.1786	22.4728	25.1105	23.7199	9	9	9	27	27	27	50.369	0	70.879	531100000	22	P61011-2;P61011	P61011-2;P61011	Signal recognition particle 54 kDa protein	SRP54	1234
NaN	20.9167	NaN	20.8685	21.1145	22.0907	NaN	20.8399	20.9332	2	2	1	13.8	13.8	7.4	20.847	0	5.8804	96509000	4	P61019-2;P61019	P61019-2;P61019	Ras-related protein Rab-2A	RAB2A	1235
NaN	22.5175	22.7407	22.1751	NaN	22.1811	22.1416	22.581	22.9356	3	2	2	20.9	16.3	16.3	23.707	0	28.673	160550000	4	P61020;P61020-2	P61020;P61020-2	Ras-related protein Rab-5B	RAB5B	1236
NaN	NaN	NaN	NaN	NaN	21.7432	NaN	NaN	NaN	5	3	3	32.5	21	21	22.541	0	31.129	41487000	6	P61026	P61026	Ras-related protein Rab-10	RAB10	1237
20.7122	21.4612	21.0344	NaN	20.5272	NaN	NaN	NaN	23.8656	3	3	3	31.3	31.3	31.3	16.687	0	15.966	117670000	5	P61077;P61077-3;P62837-2;P62837;P61077-2	P61077;P61077-3;P62837-2;P62837;P61077-2	Ubiquitin-conjugating enzyme E2 D3;Ubiquitin-conjugating enzyme E2 D2	UBE2D3;UBE2D2	1238
NaN	NaN	NaN	NaN	NaN	NaN	NaN	NaN	21.3513	1	1	1	6	6	6	20.9	0	9.4128	19765000	2	P61081	P61081	NEDD8-conjugating enzyme Ubc12	UBE2M	1239
NaN	NaN	NaN	NaN	NaN	NaN	NaN	NaN	21.5843	1	1	1	12.5	12.5	12.5	17.138	0.0028399	1.8187	66113000	3	P61088;Q5JXB2	P61088;Q5JXB2	Ubiquitin-conjugating enzyme E2 N;Putative ubiquitin-conjugating enzyme E2 N-like	UBE2N;UBE2NL	1240
22.4321	24.639	24.6101	24.7808	24.9255	25.5853	24.058	25.7765	25.6392	7	7	7	35.8	35.8	35.8	23.897	0	199.99	1265500000	44	P61106	P61106	Ras-related protein Rab-14	RAB14	1241
23.3445	23.2142	NaN	24.1792	22.8817	23.5277	23.8483	NaN	23.8745	9	9	9	37.6	37.6	37.6	47.371	0	28.031	382910000	20	P61158;Q9C0K3;Q9P1U1-2;Q9P1U1-3;Q9P1U1	P61158	Actin-related protein 3	ACTR3	1242
22.5574	22.7593	NaN	23.2399	22.2347	21.8692	22.9625	22.4417	22.9456	5	5	5	13.2	13.2	13.2	44.76	0	27.215	240370000	21	P61160;P61160-2	P61160;P61160-2	Actin-related protein 2	ACTR2	1243
NaN	NaN	NaN	NaN	NaN	NaN	NaN	NaN	19.0978	1	1	1	10.1	10.1	10.1	9.0788	0	2.7461	30327000	8	P61165	P61165	Transmembrane protein 258	TMEM258	1244
NaN	NaN	NaN	NaN	NaN	NaN	NaN	NaN	21.1311	1	1	1	4.7	4.7	4.7	51.596	0.0028736	1.8718	29564000	2	P61201;P61201-2	P61201;P61201-2	COP9 signalosome complex subunit 2	COPS2	1245
NaN	NaN	NaN	22.4944	22.4965	21.9066	NaN	23.3176	23.6407	6	6	6	18.5	18.5	18.5	67.314	0	62.042	226970000	12	P61221	P61221	ATP-binding cassette sub-family E member 1	ABCE1	1246
22.8094	23.4878	24.8597	25.0357	22.5828	25.1828	23.086	23.4603	24.2121	6	6	2	47.9	47.9	17	18.778	0	138.83	710310000	39	P61224-3;P61224;P61224-2;P61224-4;A6NIZ1	P61224-3;P61224;P61224-2;P61224-4;A6NIZ1	Ras-related protein Rap-1b;Ras-related protein Rap-1b-like protein	RAP1B	1247
NaN	NaN	NaN	NaN	NaN	NaN	NaN	NaN	NaN	1	1	1	7.7	7.7	7.7	20.504	0.00078431	2.4627	10510000	1	P61225	P61225	Ras-related protein Rap-2b	RAP2B	1248
NaN	NaN	NaN	NaN	NaN	22.8665	22.3347	NaN	NaN	1	1	1	14.6	14.6	14.6	12.099	0	26.643	87860000	9	P61244-3;P61244-4;P61244-2;P61244	P61244-3;P61244-4;P61244-2;P61244	Protein max	MAX	1249
24.524	24.4147	NaN	22.7032	23.2963	25.2823	24.5835	23.5356	22.8768	14	14	14	57.6	57.6	57.6	29.945	0	34.102	845070000	60	P61247	P61247	40S ribosomal protein S3a	RPS3A	1250
23.7297	23.1468	NaN	23.0689	22.6931	25.3427	23.8766	NaN	22.3144	6	6	6	34.5	34.5	34.5	17.256	0	15.69	509840000	25	Q9UNX3;P61254	Q9UNX3;P61254	60S ribosomal protein L26-like 1;60S ribosomal protein L26	RPL26L1;RPL26	1251
NaN	NaN	NaN	23.3791	NaN	22.0124	NaN	22.0293	22.5318	7	7	7	31.1	31.1	31.1	29.506	0	21.238	131940000	9	P61289;P61289-2;P61289-3	P61289;P61289-2;P61289-3	Proteasome activator complex subunit 3	PSME3	1252
23.9218	NaN	NaN	21.3687	NaN	24.6866	23.9317	NaN	NaN	5	5	5	33.8	33.8	33.8	24.146	0	22.879	395550000	23	P61313;P61313-2	P61313;P61313-2	60S ribosomal protein L15	RPL15	1253
22.5581	NaN	NaN	21.8078	NaN	23.8898	23.7761	NaN	NaN	6	6	1	56.2	56.2	5.5	17.163	0	12.224	175160000	12	P61326;P61326-2	P61326;P61326-2	Protein mago nashi homolog	MAGOH	1254
24.9808	23.1364	23.3693	22.8837	21.9121	26.9549	24.9976	22.58	23.4428	6	6	6	44.1	44.1	44.1	15.798	0	85.339	1588300000	45	P61353	P61353	60S ribosomal protein L27	RPL27	1255
21.8566	22.4876	NaN	22.4749	21.8403	21.0096	21.6124	24.4148	23.6795	3	3	3	13.4	13.4	13.4	40.329	0	49.799	266810000	14	P61421	P61421	V-type proton ATPase subunit d 1	ATP6V0D1	1256
NaN	23.6318	NaN	24.3828	23.4748	24.8058	23.4471	24.2592	23.851	7	7	4	44.6	44.6	16.6	21.768	0	32.638	693780000	34	P61586	P61586	Transforming protein RhoA	RHOA	1257
22.5181	24.3901	23.5746	23.0844	23.6824	22.1351	22.4279	21.864	23.0483	6	6	6	46.1	46.1	46.1	10.932	0	15.785	227600000	26	P61604	P61604	10 kDa heat shock protein, mitochondrial	HSPE1	1258
NaN	NaN	NaN	NaN	NaN	20.0375	NaN	NaN	NaN	2	2	2	9	9	9	52.264	0	3.576	9799800	2	P61619;P61619-3	P61619;P61619-3	Protein transport protein Sec61 subunit alpha isoform 1	SEC61A1	1259
NaN	NaN	NaN	NaN	NaN	NaN	NaN	NaN	21.4908	2	2	2	28.4	28.4	28.4	22.626	0	5.0623	28992000	2	P61758;P61758-2	P61758;P61758-2	Prefoldin subunit 3	VBP1	1260
NaN	NaN	NaN	NaN	NaN	NaN	NaN	NaN	21.3218	2	2	2	4.7	4.7	4.7	67.568	0	2.9251	17303000	1	P61764;P61764-2	P61764;P61764-2	Syntaxin-binding protein 1	STXBP1	1261
NaN	22.0256	23.0058	25.6546	NaN	23.7192	22.6946	25.645	23.9734	5	5	5	37.8	37.8	37.8	13.714	0	72.67	799920000	30	P61769	P61769	Beta-2-microglobulin;Beta-2-microglobulin form pI 5.3	B2M	1262
NaN	NaN	NaN	19.51	NaN	NaN	NaN	20.6799	21.2945	3	3	3	31.6	31.6	31.6	20.198	0	4.3505	30413000	4	P61923;P61923-5;P61923-4;P61923-2;P61923-3	P61923;P61923-5;P61923-4	Coatomer subunit zeta-1	COPZ1	1263
NaN	NaN	NaN	NaN	NaN	NaN	NaN	NaN	18.4901	1	1	1	15.8	15.8	15.8	18.733	0	2.5941	2336400	1	P61966	P61966	AP-1 complex subunit sigma-1A	AP1S1	1264
25.5139	24.3815	24.331	24.925	24.6297	27.5408	26.0896	25.6253	27.0447	20	20	20	44.8	44.8	44.8	51.028	0	323.31	3139200000	251	P61978-2;P61978;P61978-3	P61978-2;P61978;P61978-3	Heterogeneous nuclear ribonucleoprotein K	HNRNPK	1265
NaN	22.2929	NaN	21.114	NaN	NaN	NaN	22.5452	23.2134	6	3	3	17.8	11.3	11.3	28.302	0	96.469	158320000	7	P61981	P61981	14-3-3 protein gamma;14-3-3 protein gamma, N-terminally processed	YWHAG	1266
NaN	NaN	NaN	NaN	NaN	NaN	NaN	NaN	20.2982	1	1	1	9.4	9.4	9.4	15.094	0.0035051	1.7433	28620000	1	P62070-2;P62070-3;P62070;P62070-4	P62070-2;P62070-3;P62070;P62070-4	Ras-related protein R-Ras2	RRAS2	1267
NaN	22.1401	NaN	22.1016	22.4584	23.7126	21.4764	NaN	23.8643	4	4	4	52.2	52.2	52.2	10.333	0	126.37	238340000	10	P62072	P62072	Mitochondrial import inner membrane translocase subunit Tim10	TIMM10	1268
24.6896	23.2279	25.912	23.6155	22.8209	25.2402	25.1283	24.6368	23.8824	11	11	11	45.4	45.4	45.4	22.127	0	212.36	1400800000	122	P62081	P62081	40S ribosomal protein S7	RPS7	1269
23.6247	23.3247	23.067	22.8255	22.6623	23.5238	22.9748	23.576	23.9574	5	5	4	21.2	21.2	16.7	37.512	0	17.203	398600000	22	P62136;P62136-3;P62136-2	P62136;P62136-3;P62136-2	Serine/threonine-protein phosphatase PP1-alpha catalytic subunit	PPP1CA	1270
23.5047	NaN	22.499	NaN	22.7085	NaN	NaN	23.0513	22.8266	4	3	3	17.1	12.5	12.5	37.186	0	20.232	195000000	21	P62140	P62140	Serine/threonine-protein phosphatase PP1-beta catalytic subunit	PPP1CB	1271
NaN	NaN	NaN	NaN	NaN	21.1256	NaN	NaN	22.864	4	4	4	14.4	14.4	14.4	41.167	0	11.76	71844000	6	P62191-2;P62191	P62191-2;P62191	26S protease regulatory subunit 4	PSMC1	1272
NaN	NaN	NaN	NaN	NaN	NaN	NaN	21.2967	21.7977	3	3	3	13.8	13.8	13.8	45.626	0	18.575	46127000	4	P62195;P62195-2	P62195;P62195-2	26S protease regulatory subunit 8	PSMC5	1273
25.176	23.3111	23.8671	22.4832	NaN	25.82	24.7392	22.6832	23.3507	13	13	13	51.9	51.9	51.9	24.205	0	323.31	956590000	79	P62241	P62241	40S ribosomal protein S8	RPS8	1274
24.3022	23.27	23.2106	23.3871	23.2335	24.9847	24.3691	23.8391	24.0095	8	8	8	66.2	66.2	66.2	14.839	0	35.013	743500000	45	P62244	P62244	40S ribosomal protein S15a	RPS15A	1275
25.1684	24.4847	23.9554	23.1256	21.3025	25.3398	24.8467	24.0275	24.0692	8	8	8	41.1	41.1	41.1	16.445	0	69.651	1041900000	62	P62249	P62249	40S ribosomal protein S16	RPS16	1276
22.5484	23.2714	23.0863	NaN	22.7362	NaN	22.2243	24.9406	25.3298	4	3	3	16.9	16.9	16.9	29.174	0	26.353	465820000	22	P62258;P62258-2	P62258;P62258-2	14-3-3 protein epsilon	YWHAE	1277
26.3826	25.4862	25.5092	24.9714	25.1996	26.2182	26.3641	25.1334	24.7361	8	8	8	35.8	35.8	35.8	16.273	0	202.88	2142200000	117	P62263	P62263	40S ribosomal protein S14	RPS14	1278
22.4948	NaN	NaN	20.8322	NaN	23.1317	22.1997	21.701	NaN	3	3	3	18.2	18.2	18.2	15.807	0	9.6767	159450000	13	P62266	P62266	40S ribosomal protein S23	RPS23	1279
24.3797	24.8948	24.0905	22.7529	22.5519	24.4644	24.4474	24.1699	23.5445	7	7	7	36.8	36.8	36.8	17.718	0	279.37	845590000	54	P62269	P62269	40S ribosomal protein S18	RPS18	1280
24.405	22.6114	21.415	21.6805	20.7002	27.0363	23.8489	22.7881	21.8881	16	16	16	59.6	59.6	59.6	17.222	0	82.007	1221700000	52	P62277	P62277	40S ribosomal protein S13	RPS13	1281
25.672	23.2618	23.2998	22.5217	22.378	25.7352	25.4116	23.7153	23.1384	10	10	10	75.3	75.3	75.3	18.431	0	48.232	907830000	53	P62280	P62280	40S ribosomal protein S11	RPS11	1282
NaN	NaN	NaN	21.3638	NaN	NaN	21.9748	NaN	21.5739	4	4	4	42.2	42.2	42.2	11.845	0	6.0711	43740000	4	P62310	P62310	U6 snRNA-associated Sm-like protein LSm3	LSM3	1283
NaN	NaN	NaN	NaN	NaN	NaN	NaN	20.0417	NaN	1	1	1	31.8	31.8	31.8	5.0526	0	13.024	91982000	4	P62328	P62328	Thymosin beta-4;Hematopoietic system regulatory peptide	TMSB4X	1284
NaN	NaN	NaN	20.9666	NaN	NaN	NaN	NaN	NaN	3	3	3	14.9	14.9	14.9	44.172	0	5.8128	51408000	5	P62333	P62333	26S protease regulatory subunit 10B	PSMC6	1285
25.6184	24.0523	22.6771	23.8121	NaN	26.827	25.9757	23.4196	23.2351	22	22	22	47.4	47.4	47.4	29.995	0	246.03	2018100000	154	P62424	P62424	60S ribosomal protein L7a	RPL7A	1286
NaN	NaN	NaN	NaN	NaN	NaN	NaN	NaN	21.8956	2	2	2	18.7	18.7	18.7	17.659	0	9.6294	56083000	3	P62491-2;Q15907-2;P62491;Q15907	P62491-2;Q15907-2;P62491;Q15907	Ras-related protein Rab-11A;Ras-related protein Rab-11B	RAB11A;RAB11B	1287
25.3359	27.2985	26.8315	26.2473	27.6333	25.5587	25.5774	25.6381	25.1638	12	12	12	31.1	31.1	31.1	49.03	0	309.16	2805000000	91	P62495;P62495-2	P62495;P62495-2	Eukaryotic peptide chain release factor subunit 1	ETF1	1288
NaN	NaN	NaN	NaN	NaN	NaN	NaN	NaN	NaN	1	1	1	8.8	8.8	8.8	18.742	0	6.7688	4423000	3	P62633-2;P62633-8;P62633-5;P62633;P62633-4;P62633-6	P62633-2;P62633-8;P62633-5;P62633;P62633-4;P62633-6	Cellular nucleic acid-binding protein	CNBP	1289
NaN	NaN	NaN	NaN	NaN	NaN	NaN	NaN	23.1349	1	1	1	1.4	1.4	1.4	72.181	0.0041652	1.6692	230510000	8	P62685;Q9YNA8;Q7LDI9;P87889;P63145;P63130;P63126;P62684;P62683;P63128	P62685;Q9YNA8;Q7LDI9;P87889;P63145;P63130;P63126;P62684;P62683;P63128	Endogenous retrovirus group K member 8 Gag polyprotein;Endogenous retrovirus group K member 19 Gag polyprotein;Endogenous retrovirus group K member 6 Gag polyprotein;Endogenous retrovirus group K member 10 Gag polyprotein;Endogenous retrovirus group K member 24 Gag polyprotein;Endogenous retrovirus group K member 7 Gag polyprotein;Endogenous retrovirus group K member 9 Gag polyprotein;Endogenous …	ERVK-8;ERVK-19;ERVK-6;ERVK-10;ERVK-24;ERVK-7;ERVK-9;HERVK_113;ERVK-21	1290
24.9897	22.4319	22.8063	22.936	21.9343	27.2289	24.9663	23.4837	23.3797	13	13	13	48.7	48.7	48.7	29.597	0	77.764	1607200000	67	P62701;P22090;Q8TD47	P62701	40S ribosomal protein S4, X isoform	RPS4X	1291
NaN	NaN	NaN	21.7438	NaN	19.4441	21.6065	NaN	22.0717	1	1	1	10.7	10.7	10.7	35.594	0	11.005	68839000	7	P67775;P62714	P67775;P62714	Serine/threonine-protein phosphatase 2A catalytic subunit alpha isoform;Serine/threonine-protein phosphatase 2A catalytic subunit beta isoform	PPP2CA;PPP2CB	1292
23.7232	22.9073	23.5186	NaN	NaN	24.3545	25.082	21.3827	NaN	3	3	3	23.7	23.7	23.7	17.695	0	6.7255	456500000	13	P62750	P62750	60S ribosomal protein L23a	RPL23A	1293
25.0336	24.3709	23.6279	23.4591	23.0032	26.6389	25.3157	24.0755	24.1284	10	10	10	47	47	47	28.68	0	251.54	1647800000	86	P62753	P62753	40S ribosomal protein S6	RPS6	1294
24.8749	23.4461	23.2177	22.571	22.4706	26.3575	24.155	24.6887	22.6496	13	13	13	70.9	70.9	70.9	11.367	0	256.59	1469300000	102	P62805	P62805	Histone H4	HIST1H4A	1295
NaN	22.7498	22.9315	23.6143	NaN	24.4775	21.522	22.7849	24.6442	7	5	5	29.8	21.5	21.5	22.677	0	97.945	464910000	22	P62820;P62820-2;P62820-3	P62820;P62820-2;P62820-3	Ras-related protein Rab-1A	RAB1A	1296
24.8586	25.1065	25.1092	24.6047	23.9567	25.5458	25.0196	23.9082	26.0798	8	8	8	45.4	45.4	45.4	24.423	0	108.74	1352300000	78	P62826	P62826	GTP-binding nuclear protein Ran	RAN	1297
26.905	25.6741	24.7691	25.6535	26.0048	26.4281	27.7408	24.3815	23.7444	12	12	12	49.3	49.3	49.3	14.865	0	151.34	2719400000	207	P62829	P62829	60S ribosomal protein L23	RPL23	1298
NaN	NaN	NaN	22.1954	NaN	NaN	NaN	NaN	NaN	6	2	2	42.9	15.2	15.2	20.987	0.00078462	2.4655	28847000	2	P62834	P62834	Ras-related protein Rap-1A	RAP1A	1299
NaN	NaN	NaN	NaN	NaN	NaN	NaN	NaN	NaN	1	1	1	15.2	15.2	15.2	17.04	0	103.03	22118000	3	P62841	P62841	40S ribosomal protein S15	RPS15	1300
22.884	NaN	NaN	21.984	NaN	23.906	22.8979	22.4318	22.2625	6	6	6	27.7	27.7	27.7	15.069	0	14.876	255320000	17	P62847-2;P62847-3;P62847;P62847-4	P62847-2;P62847-3;P62847;P62847-4	40S ribosomal protein S24	RPS24	1301
22.5751	22.4747	NaN	NaN	NaN	22.7238	22.4181	22.4147	21.7898	5	5	5	24.8	24.8	24.8	13.742	0	5.4548	186270000	10	P62851	P62851	40S ribosomal protein S25	RPS25	1302
24.7293	24.4902	24.5973	22.751	23.5321	24.8117	24.1622	24.6689	26.1448	6	6	6	85.5	85.5	85.5	7.8409	0	114.96	1186800000	39	P62857	P62857	40S ribosomal protein S28	RPS28	1303
22.3788	22.12	23.1995	NaN	NaN	23.7196	21.9762	NaN	NaN	2	2	2	18.6	18.6	18.6	6.6478	0	17.532	205470000	23	P62861	P62861	40S ribosomal protein S30	FAU	1304
NaN	24.3311	NaN	25.5443	24.2669	24.9498	23.9378	25.0865	24.6814	7	7	7	26.8	26.8	26.8	36.297	0	307.84	885900000	22	P62873-2;P62873	P62873-2;P62873	Guanine nucleotide-binding protein G(I)/G(S)/G(T) subunit beta-1	GNB1	1305
NaN	NaN	NaN	NaN	NaN	NaN	NaN	NaN	19.914	2	2	2	17.6	17.6	17.6	12.274	0	57.309	19569000	4	P62877	P62877	E3 ubiquitin-protein ligase RBX1;E3 ubiquitin-protein ligase RBX1, N-terminally processed	RBX1	1306
23.0105	23.6791	23.6195	25.1681	23.8646	23.1568	23.1038	24.2304	23.3246	6	6	4	16.2	16.2	12.4	37.331	0	62.559	579950000	19	P62879;P62879-2	P62879	Guanine nucleotide-binding protein G(I)/G(S)/G(T) subunit beta-2	GNB2	1307
22.193	NaN	NaN	NaN	NaN	23.6706	21.7223	21.7439	NaN	5	5	5	55.7	55.7	55.7	12.784	0	120.03	204240000	29	P62888	P62888	60S ribosomal protein L30	RPL30	1308
NaN	NaN	NaN	NaN	NaN	NaN	NaN	NaN	NaN	1	1	1	19.6	19.6	19.6	6.3225	0	5.8368	144200000	11	Q59GN2;P62891	Q59GN2;P62891	Putative 60S ribosomal protein L39-like 5;60S ribosomal protein L39	RPL39P5;RPL39	1309
23.4692	22.8813	23.1785	22.4982	NaN	25.6444	24.1136	NaN	NaN	3	3	3	28.1	28.1	28.1	13.995	0	12.566	569760000	18	P62899-3;P62899;P62899-2	P62899-3;P62899;P62899-2	60S ribosomal protein L31	RPL31	1310
25.4252	24.4344	24.2252	24.1584	NaN	27.7596	26.0591	24.0399	24.1243	15	15	15	46.1	46.1	46.1	24.831	0	210.65	2959400000	101	P62906	P62906	60S ribosomal protein L10a	RPL10A	1311
23.9111	22.326	22.733	21.4191	21.3748	25.2925	24.3746	22.4622	22.0048	5	5	5	32.6	32.6	32.6	15.86	0	14.939	519660000	32	P62910	P62910	60S ribosomal protein L32	RPL32	1312
25.5984	24.5618	24.6209	24.844	24.4268	25.8432	25.6233	24.7724	24.7128	8	8	8	42.7	42.7	42.7	20.252	0	262.01	1743100000	75	P62913;P62913-2	P62913;P62913-2	60S ribosomal protein L11	RPL11	1313
25.3227	24.7866	23.5884	24.2694	22.1783	28.4637	25.4117	24.4944	23.3727	12	12	12	52.1	52.1	52.1	28.024	0	50.225	3239300000	77	P62917	P62917	60S ribosomal protein L8	RPL8	1314
25.9163	26.9162	25.8478	25.6853	26.0277	25.6913	25.1337	25.2592	26.8422	14	14	14	92.1	92.1	92.1	18.012	0	323.31	2446300000	159	P62937;P62937-2;P0DN26;A0A0B4J2A2;A0A075B767;A0A075B759;Q9Y536;F5H284	P62937;P62937-2	Peptidyl-prolyl cis-trans isomerase A;Peptidyl-prolyl cis-trans isomerase A, N-terminally processed	PPIA	1315
23.5	24.5077	25.8107	NaN	22.7927	NaN	22.6059	NaN	21.5768	3	3	3	28.7	28.7	28.7	11.951	0	11.707	147660000	11	P62942	P62942	Peptidyl-prolyl cis-trans isomerase FKBP1A	FKBP1A	1316
25.3446	24.5898	26.5926	24.1762	25.0215	23.9373	26.0382	26.7917	26.4401	8	8	8	52.3	52.3	52.3	14.728	0	189.28	2419000000	73	P62987;P62979;P0CG47;P0CG48	P62987;P62979;P0CG47;P0CG48	Ubiquitin-60S ribosomal protein L40;Ubiquitin;60S ribosomal protein L40;Ubiquitin-40S ribosomal protein S27a;Ubiquitin;40S ribosomal protein S27a;Polyubiquitin-B;Ubiquitin;Polyubiquitin-C;Ubiquitin	UBA52;RPS27A;UBB;UBC	1317
NaN	NaN	NaN	NaN	NaN	NaN	NaN	20.5963	NaN	1	1	1	5.7	5.7	5.7	20.557	0.0018096	1.9246	11610000	0	P62993-2;P62993	P62993-2;P62993	Growth factor receptor-bound protein 2	GRB2	1318
23.1118	22.6653	24.0748	NaN	NaN	24.8997	NaN	NaN	NaN	5	5	5	34.6	34.6	34.6	21.935	0	206.46	245510000	12	P62995-3;P62995	P62995-3;P62995	Transformer-2 protein homolog beta	TRA2B	1319
23.2452	24.2975	NaN	24.057	24.4863	24.2676	22.3233	23.9849	24.2375	4	2	2	17.1	7.1	7.1	23.467	0	14.14	532250000	12	P63000-2;P63000;P60763	P63000-2;P63000;P60763	Ras-related C3 botulinum toxin substrate 1;Ras-related C3 botulinum toxin substrate 3	RAC1;RAC3	1320
NaN	NaN	NaN	NaN	NaN	23.1349	NaN	21.923	NaN	5	5	4	10	10	8.6	98.117	0	3.8948	82255000	6	P63010-3;P63010;P63010-2	P63010-3;P63010;P63010-2	AP-2 complex subunit beta	AP2B1	1321
22.7256	23.6221	23.1572	23.2146	22.4104	22.158	22.2868	23.2516	23.7762	8	6	6	16.1	16.1	16.1	44.179	0	31.14	271530000	19	P63092-3;P63092-2;P63092;P63092-4;Q5JWF2-2;Q5JWF2;P38405;P38405-2	P63092-3;P63092-2;P63092;P63092-4;Q5JWF2-2;Q5JWF2	Guanine nucleotide-binding protein G(s) subunit alpha isoforms short;Guanine nucleotide-binding protein G(s) subunit alpha isoforms XLas	GNAS	1322
NaN	NaN	NaN	NaN	NaN	NaN	NaN	NaN	20.3735	8	1	1	16.9	5.4	5.4	40.361	0.0007725	2.3289	15687000	1	P63096;P63096-2	P63096	Guanine nucleotide-binding protein G(i) subunit alpha-1	GNAI1	1323
24.4124	24.8291	24.7927	25.3046	24.2834	22.6921	24.9105	25.2665	26.124	8	7	6	33.5	33.5	33.5	27.745	0	158.4	1209200000	41	P63104;P63104-2	P63104	14-3-3 protein zeta/delta	YWHAZ	1324
NaN	NaN	NaN	21.4407	NaN	NaN	NaN	NaN	NaN	3	3	3	14.1	14.1	14.1	51.691	0	7.3929	56969000	3	P63151;P63151-2	P63151;P63151-2	Serine/threonine-protein phosphatase 2A 55 kDa regulatory subunit B alpha isoform	PPP2R2A	1325
NaN	NaN	NaN	NaN	NaN	21.5009	NaN	22.1541	21.092	2	2	2	41.6	41.6	41.6	10.366	0	3.5164	71954000	5	P63167;Q96FJ2	P63167;Q96FJ2	Dynein light chain 1, cytoplasmic;Dynein light chain 2, cytoplasmic	DYNLL1;DYNLL2	1326
24.7051	24.2302	24.7997	24.4455	24.3398	25.2335	25.7886	25.3358	25.1363	7	7	7	61.4	61.4	61.4	8.2178	0	34.815	1023900000	37	P63173	P63173	60S ribosomal protein L38	RPL38	1327
23.5681	23.4371	23.151	22.5663	22.3072	22.6925	24.9171	22.1359	22.9489	6	6	6	74.7	74.7	74.7	9.1113	0	73.776	293970000	33	P63220	P63220	40S ribosomal protein S21	RPS21	1328
24.3868	25.0238	25.6247	23.8118	23.3962	23.0637	24.1706	23.7461	26.2099	8	8	8	37	37	37	16.773	0	323.31	845260000	60	Q6IS14;P63241;Q9GZV4;P63241-2	Q6IS14;P63241;Q9GZV4;P63241-2	Eukaryotic translation initiation factor 5A-1-like;Eukaryotic translation initiation factor 5A-1;Eukaryotic translation initiation factor 5A-2	EIF5AL1;EIF5A;EIF5A2	1329
NaN	NaN	NaN	NaN	NaN	21.1184	NaN	21.6394	22.8993	4	4	4	16.4	16.4	16.4	35.076	0	4.6147	120610000	3	P63244	P63244	Guanine nucleotide-binding protein subunit beta-2-like 1;Guanine nucleotide-binding protein subunit beta-2-like 1, N-terminally processed	GNB2L1	1330
NaN	NaN	24.7738	25.1661	NaN	25.2657	25.8918	24.3582	25.1105	44	2	2	95.7	7.2	7.2	41.792	0	323.31	2121300000	106	P63261	P63261	Actin, cytoplasmic 2;Actin, cytoplasmic 2, N-terminally processed	ACTG1	1331
NaN	NaN	NaN	NaN	NaN	NaN	NaN	NaN	NaN	1	1	1	8.5	8.5	8.5	13.193	0	5.7806	42715000	1	P63272	P63272	Transcription elongation factor SPT4	SUPT4H1	1332
NaN	23.3393	NaN	NaN	NaN	NaN	NaN	NaN	NaN	3	3	3	15.8	15.8	15.8	18.007	0	5.5632	27604000	3	P63279	P63279	SUMO-conjugating enzyme UBC9	UBE2I	1333
27.1813	26.151	NaN	NaN	25.5764	NaN	27.5469	NaN	25.5153	2	2	2	36.4	36.4	36.4	5.0256	0	15.632	1034000000	13	P63313	P63313	Thymosin beta-10	TMSB10	1334
25.0175	24.9423	24.1733	23.813	23.4699	24.3857	24.7477	24.327	23.707	3	3	3	15.1	15.1	15.1	35.924	0	140.23	1055400000	35	P67809;P16989-2;P16989-3;P16989	P67809	Nuclease-sensitive element-binding protein 1	YBX1	1335
NaN	NaN	22.799	NaN	23.2821	NaN	NaN	NaN	NaN	2	2	2	17.7	17.7	17.7	18.988	0	63.668	303600000	15	P67812-4;P67812;P67812-3;P67812-2;P0C7V7	P67812-4;P67812;P67812-3;P67812-2;P0C7V7	Signal peptidase complex catalytic subunit SEC11A;Putative signal peptidase complex catalytic subunit SEC11B	SEC11A;SEC11B	1336
NaN	NaN	NaN	NaN	NaN	NaN	NaN	NaN	18.9287	1	1	1	10.7	10.7	10.7	24.942	0.0011144	2.0562	13971000	4	P67870	P67870	Casein kinase II subunit beta	CSNK2B	1337
24.3257	23.4783	24.234	25.0328	23.2022	24.9348	25.1266	23.7197	25.0737	12	8	8	52.4	32.3	32.3	28.521	0	323.31	1155400000	57	P67936;P67936-2	P67936;P67936-2	Tropomyosin alpha-4 chain	TPM4	1338
22.4766	23.8982	20.844	25.8518	23.8048	28.678	23.3325	27.2001	27.3085	26	7	7	40.1	14.6	14.6	42.051	0	323.31	8401300000	167	P68133;P68032;P63267;P62736;P63267-2	P68133;P68032;P63267;P62736;P63267-2	Actin, alpha skeletal muscle;Actin, alpha cardiac muscle 1;Actin, gamma-enteric smooth muscle;Actin, aortic smooth muscle	ACTA1;ACTC1;ACTG2;ACTA2	1339
27.9012	29.2629	29.1653	28.8216	29.5412	27.5304	27.8246	28.6214	28.5173	18	18	18	48.3	48.3	48.3	50.14	0	323.31	18915000000	540	P68104;Q5VTE0;P68104-2;Q05639	P68104;Q5VTE0;P68104-2	Elongation factor 1-alpha 1;Putative elongation factor 1-alpha-like 3	EEF1A1;EEF1A1P5	1340
30.3048	30.6139	30.4833	31.6199	31.1258	30.3703	30.123	31.4772	31.5703	42	42	0	72.5	72.5	0	50.151	0	323.31	82958000000	1048	P68363;P68363-2;A6NHL2-2;A6NHL2;Q9H853	P68363;P68363-2	Tubulin alpha-1B chain	TUBA1B	1341
22.8557	22.1554	NaN	24.8735	22.7291	23.1399	24.0582	24.6008	24.6403	30	5	5	66.3	17.3	17.3	48.328	0	273.6	714360000	33	P68366-2;P68366	P68366-2;P68366	Tubulin alpha-4A chain	TUBA4A	1342
29.6236	29.8531	29.5147	30.9817	30.3209	30.1643	29.5795	30.749	31.006	45	45	2	79.3	79.3	3.6	49.83	0	323.31	59455000000	1387	P68371	P68371	Tubulin beta-4B chain	TUBB4B	1343
23.1322	21.6856	NaN	23.3058	21.3266	24.1288	23.2591	21.951	22.2208	5	5	5	20.7	20.7	20.7	45.143	0	18.46	308200000	24	P68400;Q8NEV1;P68400-2	P68400;Q8NEV1;P68400-2	Casein kinase II subunit alpha;Casein kinase II subunit alpha 3	CSNK2A1;CSNK2A3	1344
26.8964	23.4769	22.2187	20.265	NaN	26.1868	24.6674	23.6492	21.6132	8	8	8	39	39	39	15.388	0	56.915	1288300000	52	Q71DI3;P84243;P68431;Q6NXT2;Q16695;P0DPK2;P0DPK5	Q71DI3;P84243;P68431;Q6NXT2;Q16695	Histone H3.2;Histone H3.3;Histone H3.1;Histone H3.3C;Histone H3.1t	HIST2H3A;H3F3A;HIST1H3A;H3F3C;HIST3H3	1345
NaN	NaN	NaN	NaN	NaN	NaN	NaN	NaN	NaN	5	1	1	34.5	16.9	16.9	15.257	0.00078186	2.4415	5972600	1	P69905	P69905	Hemoglobin subunit alpha	HBA1	1346
NaN	22.8841	NaN	NaN	NaN	NaN	NaN	24.3527	21.6595	6	6	6	32.4	32.4	32.4	35.569	0	73.87	173960000	13	P78310-7;P78310;P78310-2;P78310-6;P78310-5;P78310-4	P78310-7;P78310;P78310-2;P78310-6	Coxsackievirus and adenovirus receptor	CXADR	1347
24.0618	NaN	NaN	21.6424	NaN	25.212	24.485	21.5445	21.4469	8	8	8	11.3	11.3	11.3	97.667	0	22.406	426840000	18	P78316;P78316-2	P78316;P78316-2	Nucleolar protein 14	NOP14	1348
NaN	NaN	NaN	NaN	NaN	NaN	NaN	NaN	20.6428	1	1	1	6.5	6.5	6.5	39.221	0	5.6804	32373000	3	P78318	P78318	Immunoglobulin-binding protein 1	IGBP1	1349
23.5617	23.9325	23.2744	26.2352	25.1791	22.2086	21.9226	26.2051	24.3454	9	9	9	21.1	21.1	21.1	54.851	0	208.91	1062900000	59	P78324-4;P78324;P78324-2;Q5TFQ8;Q9P1W8-3;O00241-2;Q9P1W8-4;Q9P1W8-2;Q9P1W8;O00241	P78324-4;P78324;P78324-2	Tyrosine-protein phosphatase non-receptor type substrate 1	SIRPA	1350
NaN	NaN	NaN	NaN	NaN	20.8506	NaN	21.3594	22.2209	3	3	3	5.7	5.7	5.7	102.36	0	14.852	69972000	12	P78344;P78344-2	P78344;P78344-2	Eukaryotic translation initiation factor 4 gamma 2	EIF4G2	1351
24.0339	23.4543	NaN	22.2951	21.9347	23.1398	22.5645	22.2269	NaN	7	7	7	8	8	8	107.97	0	19.042	215840000	41	P78347-2;P78347-4;P78347-3;P78347;P78347-5;Q86UP8-3;Q86UP8;Q6EKJ0	P78347-2;P78347-4;P78347-3;P78347	General transcription factor II-I	GTF2I	1352
NaN	NaN	NaN	NaN	NaN	NaN	NaN	NaN	21.4424	2	2	1	7.7	7.7	4.3	47.377	0	5.3818	23072000	2	P78356;P48426-2;P48426	P78356;P48426-2;P48426	Phosphatidylinositol 5-phosphate 4-kinase type-2 beta;Phosphatidylinositol 5-phosphate 4-kinase type-2 alpha	PIP4K2B;PIP4K2A	1353
27.0788	28.3531	27.8213	25.4569	27.4357	25.1881	26.8448	26.3006	25.5793	23	23	23	20.4	20.4	20.4	156.26	0	323.31	3703000000	301	P78357	P78357	Contactin-associated protein 1	CNTNAP1	1354
NaN	NaN	NaN	NaN	NaN	NaN	NaN	NaN	NaN	1	1	1	0.4	0.4	0.4	255.94	0.0087572	1.4776	8141900	1	P78363	P78363	Retinal-specific ATP-binding cassette transporter	ABCA4	1355
24.2043	NaN	NaN	25.9932	NaN	24.514	23.9413	22.7741	25.2556	17	17	17	52.9	52.9	52.9	57.488	0	123.97	781850000	49	P78371;P78371-2	P78371;P78371-2	T-complex protein 1 subunit beta	CCT2	1356
NaN	NaN	NaN	NaN	NaN	22.8773	NaN	21.7691	NaN	3	3	3	13.3	13.3	13.3	40.968	0	30.36	83194000	4	P78406	P78406	mRNA export factor	RAE1	1357
NaN	NaN	NaN	NaN	NaN	NaN	NaN	22.2726	23.8153	3	3	3	16.8	16.8	16.8	23.708	0	8.8615	136920000	10	P78417-2;P78417;P78417-3	P78417-2;P78417	Glutathione S-transferase omega-1	GSTO1	1358
NaN	NaN	NaN	NaN	NaN	NaN	NaN	19.1979	NaN	1	1	1	0.9	0.9	0.9	133.8	0.0041609	1.6615	4262000	2	P78504	P78504	Protein jagged-1	JAG1	1359
26.8818	27.8436	28.1072	27.5931	28.0938	27.2466	26.5849	27.2529	26.9605	74	74	74	21.3	21.3	21.3	469.08	0	323.31	5452900000	364	P78527;P78527-2	P78527;P78527-2	DNA-dependent protein kinase catalytic subunit	PRKDC	1360
NaN	NaN	NaN	22.836	22.4673	NaN	NaN	22.6089	NaN	4	4	4	8.1	8.1	8.1	93.02	0	20.201	93946000	9	P78536;P78536-2	P78536;P78536-2	Disintegrin and metalloproteinase domain-containing protein 17	ADAM17	1361
NaN	NaN	NaN	NaN	NaN	NaN	NaN	22.1247	NaN	2	2	2	7.9	7.9	7.9	31.658	0	2.7172	36320000	1	P78552-2;P78552	P78552-2;P78552	Interleukin-13 receptor subunit alpha-1	IL13RA1	1362
NaN	NaN	NaN	NaN	NaN	NaN	NaN	NaN	NaN	2	2	2	0.9	0.9	0.9	305.48	0.0028561	1.8392	19647000	2	P78559;P78559-2	P78559;P78559-2	Microtubule-associated protein 1A;MAP1A heavy chain;MAP1 light chain LC2	MAP1A	1363
NaN	NaN	NaN	NaN	NaN	18.4761	NaN	NaN	NaN	2	2	2	6.6	6.6	6.6	31.546	0	4.8684	11045000	2	P80217;P80217-2	P80217;P80217-2	Interferon-induced 35 kDa protein	IFI35	1364
NaN	NaN	NaN	NaN	NaN	NaN	NaN	NaN	NaN	1	1	1	16.8	16.8	16.8	17.664	0	23.516	246270000	4	P80723-2;P80723	P80723-2;P80723	Brain acid soluble protein 1	BASP1	1365
NaN	NaN	NaN	NaN	NaN	21.8367	NaN	NaN	NaN	3	3	3	13.1	13.1	13.1	41.28	0	3.6134	45479000	3	P82650;P82650-2	P82650	28S ribosomal protein S22, mitochondrial	MRPS22	1366
23.3019	23.7471	22.9279	NaN	23.1218	NaN	23.0785	NaN	22.5895	4	4	4	15.2	15.2	15.2	23.671	0	8.1549	163270000	19	P82979	P82979	SAP domain-containing ribonucleoprotein	SARNP	1367
25.2275	23.8347	23.655	23.7333	22.5955	26.541	25.6213	23.8204	22.4318	8	8	8	36.9	36.9	36.9	17.779	0	59.002	1273300000	75	P83731	P83731	60S ribosomal protein L24	RPL24	1368
NaN	NaN	NaN	NaN	NaN	NaN	NaN	NaN	NaN	1	1	1	12.3	12.3	12.3	12.469	0	5.5487	20465000	5	Q969Q0;P83881	Q969Q0;P83881	60S ribosomal protein L36a-like;60S ribosomal protein L36a	RPL36AL;RPL36A	1369
26.0338	NaN	NaN	22.5895	NaN	22.5605	23.7413	NaN	23.0106	2	2	2	15.4	15.4	15.4	12.259	0	154.48	543540000	26	P84090	P84090	Enhancer of rudimentary homolog	ERH	1370
NaN	23.932	NaN	23.8887	NaN	23.3116	23.0384	25.0426	24.6959	3	3	3	30.9	30.9	30.9	21.308	0	59.394	606270000	17	P84095	P84095	Rho-related GTP-binding protein RhoG	RHOG	1371
24.1287	23.4124	23.3153	22.9384	22.7667	25.3967	24.2952	23.2765	21.9516	6	6	6	19.4	19.4	19.4	23.466	0	323.31	741440000	65	P84098	P84098	60S ribosomal protein L19	RPL19	1372
22.9034	22.4336	22.9602	NaN	NaN	24.0447	22.0908	NaN	22.6112	5	5	5	46.8	46.8	46.8	14.203	0	53.831	264390000	24	P84103-2;P84103	P84103-2;P84103	Serine/arginine-rich splicing factor 3	SRSF3	1373
NaN	NaN	23.0722	22.0766	NaN	NaN	22.5687	24.0975	23.2529	1	1	1	8.8	8.8	8.8	17.493	0	180.75	235010000	10	P84157-2	P84157-2			1374
NaN	NaN	NaN	21.0181	NaN	NaN	NaN	NaN	NaN	2	2	2	7.1	7.1	7.1	55.866	0.0007767	2.3798	16495000	2	P86791;P86790	P86791;P86790	Vacuolar fusion protein CCZ1 homolog;Vacuolar fusion protein CCZ1 homolog B	CCZ1;CCZ1B	1375
22.1979	NaN	NaN	NaN	NaN	NaN	NaN	NaN	NaN	3	3	3	6.6	6.6	6.6	126.57	0	3.8859	12724000	7	P98095;P98095-2	P98095;P98095-2	Fibulin-2	FBLN2	1376
NaN	21.8928	NaN	23.6547	22.6023	NaN	23.5629	25.3909	23.6075	11	11	11	22.4	22.4	22.4	93.382	0	52.361	473140000	30	P98155-2;P98155	P98155-2;P98155	Very low-density lipoprotein receptor	VLDLR	1377
22.913	23.1654	NaN	NaN	NaN	23.1502	NaN	21.2655	NaN	13	13	13	4.7	4.7	4.7	468.83	0	15.212	121190000	18	P98160	P98160	Basement membrane-specific heparan sulfate proteoglycan core protein;Endorepellin;LG3 peptide	HSPG2	1378
23.1578	23.2514	23.3476	24.6911	23.6515	NaN	NaN	24.0317	22.0022	5	4	4	23.4	15.6	15.6	38.006	0	32.116	301260000	21	P98172	P98172	Ephrin-B1	EFNB1	1379
NaN	NaN	NaN	NaN	NaN	NaN	21.0139	NaN	NaN	3	3	3	9.4	9.4	9.4	94.369	0	3.8598	20016000	2	P98175-4;P98175-3;P98175-2;P98175;P98175-5	P98175-4;P98175-3;P98175-2;P98175;P98175-5	RNA-binding protein 10	RBM10	1380
24.8312	24.7624	24.8301	23.0161	24.0951	22.8744	24.7629	23.4672	23.7372	4	4	4	34.4	34.4	34.4	17.17	0	83.851	884520000	74	P98179	P98179	RNA-binding protein 3	RBM3	1381
NaN	NaN	NaN	NaN	NaN	NaN	NaN	23.1261	NaN	4	4	4	6.8	6.8	6.8	96.959	0	8.0057	109220000	6	P98194-2;P98194-4;P98194;P98194-3;P98194-5;P98194-8;P98194-9;P98194-6;P98194-7	P98194-2;P98194-4;P98194;P98194-3;P98194-5;P98194-8;P98194-9;P98194-6;P98194-7	Calcium-transporting ATPase type 2C member 1	ATP2C1	1382
NaN	NaN	NaN	NaN	NaN	NaN	NaN	21.8939	22.3237	5	5	5	20.4	20.4	20.4	52.296	0	12.656	60251000	7	Q00013;Q00013-3;Q00013-2	Q00013;Q00013-3;Q00013-2	55 kDa erythrocyte membrane protein	MPP1	1383
NaN	NaN	NaN	NaN	NaN	NaN	NaN	NaN	NaN	2	2	2	16.7	16.7	16.7	29.096	0	3.0435	14080000	3	Q00059;Q00059-2	Q00059;Q00059-2	Transcription factor A, mitochondrial	TFAM	1384
NaN	NaN	NaN	20.6077	NaN	NaN	NaN	NaN	NaN	1	1	1	8.1	8.1	8.1	31.806	0	3.1304	6658500	1	Q00169	Q00169	Phosphatidylinositol transfer protein alpha isoform	PITPNA	1385
27.1371	27.8183	27.6752	27.9858	28.0188	26.7752	26.1778	27.6726	27.0808	12	12	12	33.8	33.8	33.8	39.958	0	323.31	5978800000	150	Q00325-2;Q00325	Q00325-2;Q00325	Phosphate carrier protein, mitochondrial	SLC25A3	1386
23.8295	NaN	NaN	23.7685	NaN	23.7667	24.049	24.5063	24.7572	10	10	10	11.3	11.3	11.3	141.45	0	43.692	591430000	12	Q00341;Q00341-2	Q00341;Q00341-2	Vigilin	HDLBP	1387
NaN	NaN	NaN	NaN	NaN	NaN	NaN	19.2587	NaN	1	1	1	3.5	3.5	3.5	34.833	0.001809	1.9242	11406000	1	Q00403	Q00403	Transcription initiation factor IIB	GTF2B	1388
22.2567	22.1223	NaN	22.7199	22.6663	21.2242	22.3206	23.2282	22.2523	5	4	4	20.9	18.2	18.2	33.304	0	6.354	172570000	13	Q00535;Q00535-2	Q00535;Q00535-2	Cyclin-dependent-like kinase 5	CDK5	1389
NaN	NaN	NaN	NaN	NaN	NaN	NaN	21.102	NaN	1	1	1	4.7	4.7	4.7	39.686	0.00075443	2.1442	43234000	3	Q00587-2;Q00587	Q00587-2;Q00587	Cdc42 effector protein 1	CDC42EP1	1390
25.3125	25.4021	24.9421	23.8734	22.9827	28.061	24.629	24.9822	24.5529	48	48	48	37.7	37.7	37.7	187.89	0	323.31	3401000000	204	Q00610-2;Q00610;P53675-2;P53675	Q00610-2;Q00610	Clathrin heavy chain 1	CLTC	1391
NaN	NaN	NaN	NaN	NaN	NaN	NaN	NaN	NaN	1	1	1	8.5	8.5	8.5	25.177	0.0097087	1.4309	36606000	1	Q00688	Q00688	Peptidyl-prolyl cis-trans isomerase FKBP3	FKBP3	1392
29.795	25.0516	25.2736	27.4134	24.7909	29.3055	30.3082	26.6649	27.7903	34	34	34	38.8	38.8	38.8	88.979	0	323.31	14520000000	581	Q00839-2;Q00839	Q00839-2;Q00839	Heterogeneous nuclear ribonucleoprotein U	HNRNPU	1393
27.0968	26.5002	29.1237	26.0135	25.9696	26.8806	26.733	25.492	26.5268	17	17	17	12.7	12.7	12.7	274.61	0	54.143	4111100000	55	Q01082;Q01082-3;Q01082-2	Q01082;Q01082-3;Q01082-2	Spectrin beta chain, non-erythrocytic 1	SPTBN1	1394
NaN	NaN	NaN	NaN	NaN	NaN	NaN	NaN	NaN	1	1	1	11	11	11	24.153	0	5.1606	12288000	3	Q01130-2;Q01130	Q01130-2;Q01130	Serine/arginine-rich splicing factor 2	SRSF2	1395
NaN	NaN	NaN	NaN	NaN	NaN	NaN	NaN	19.6018	1	1	1	8.7	8.7	8.7	26.509	0.0007731	2.3353	9574100	1	Q01196-7;Q01196-4;Q01196-11;Q01196;Q01196-9;Q01196-10;Q01196-2;Q01196-8	Q01196-7;Q01196-4;Q01196-11;Q01196;Q01196-9;Q01196-10;Q01196-2;Q01196-8	Runt-related transcription factor 1	RUNX1	1396
NaN	NaN	NaN	23.1856	NaN	21.8786	NaN	NaN	NaN	5	5	5	8.5	8.5	8.5	92.07	0	8.4469	69350000	5	Q01433-2;Q01433;Q01433-3;Q01433-5;Q01433-4	Q01433-2;Q01433;Q01433-3;Q01433-5;Q01433-4	AMP deaminase 2	AMPD2	1397
22.8301	23.1028	NaN	25.7118	23.3566	23.2708	22.0757	NaN	23.4302	6	6	6	21.3	21.3	21.3	51.901	0	178.02	464310000	16	Q01518;Q01518-2	Q01518;Q01518-2	Adenylyl cyclase-associated protein 1	CAP1	1398
22.4273	24.717	22.1314	25.9227	24.0021	NaN	22.2051	NaN	23.2956	7	7	7	21.9	21.9	21.9	57.293	0	158.63	420200000	27	Q01581	Q01581	Hydroxymethylglutaryl-CoA synthase, cytoplasmic	HMGCS1	1399
NaN	23.2643	23.6723	24.7096	25.0009	20.9286	21.9009	24.7094	22.5647	3	3	3	6.3	6.3	6.3	55.01	0	212.47	431660000	21	Q01650	Q01650	Large neutral amino acids transporter small subunit 1	SLC7A5	1400
NaN	NaN	NaN	NaN	NaN	21.6847	NaN	NaN	NaN	2	2	2	19.9	19.9	19.9	19.443	0.00039746	2.5622	34858000	2	Q01658	Q01658	Protein Dr1	DR1	1401
23.8126	NaN	NaN	22.7431	NaN	23.9428	24.2487	NaN	NaN	8	8	8	14.5	14.5	14.5	100.83	0	38.517	273120000	16	Q01780;Q01780-2	Q01780;Q01780-2	Exosome component 10	EXOSC10	1402
24.1517	24.0907	24.199	25.5611	23.0347	24.1893	25.2732	27.8475	27.0429	29	29	27	37.2	37.2	33.7	85.595	0	182.2	2837600000	105	Q01813;Q01813-2	Q01813;Q01813-2	ATP-dependent 6-phosphofructokinase, platelet type	PFKP	1403
22.7912	23.7284	23.3585	22.5907	22.2652	23.0583	22.2912	22.4815	22.4623	14	14	14	21.9	21.9	21.9	131.2	0	34.717	401860000	33	Q01970-2;Q01970	Q01970-2;Q01970	1-phosphatidylinositol 4,5-bisphosphate phosphodiesterase beta-3	PLCB3	1404
22.8038	NaN	22.6418	23.9217	23.4497	NaN	NaN	22.6822	NaN	4	4	4	8.5	8.5	8.5	104.28	0	6.5068	144810000	8	Q01973;Q01973-3;Q01973-2	Q01973;Q01973-3	Tyrosine-protein kinase transmembrane receptor ROR1	ROR1	1405
23.2707	NaN	NaN	22.3754	22.0338	NaN	NaN	NaN	NaN	1	1	1	10.9	10.9	10.9	22.611	0	3.8474	55294000	4	Q01995	Q01995	Transgelin	TAGLN	1406
NaN	NaN	NaN	NaN	NaN	22.0165	22.1641	NaN	22.3833	4	4	4	9.5	9.5	9.5	115.93	0	3.6466	68848000	6	Q02218;Q02218-2;Q02218-3	Q02218;Q02218-2	2-oxoglutarate dehydrogenase, mitochondrial	OGDH	1407
NaN	NaN	NaN	NaN	NaN	NaN	22.3576	NaN	NaN	6	6	6	11.1	11.1	11.1	98.104	0	6.4847	71990000	10	Q02241-2;Q02241-3;Q02241	Q02241-2;Q02241-3;Q02241	Kinesin-like protein KIF23	KIF23	1408
NaN	NaN	NaN	22.6245	20.4291	NaN	NaN	NaN	NaN	1	1	1	4.1	4.1	4.1	65.46	0	3.8237	29542000	3	Q02297-11;Q02297-7;Q02297;Q02297-6;Q02297-2	Q02297-11;Q02297-7;Q02297;Q02297-6;Q02297-2	Pro-neuregulin-1, membrane-bound isoform;Neuregulin-1	NRG1	1409
NaN	NaN	NaN	NaN	NaN	22.5067	NaN	NaN	NaN	6	6	6	4.4	4.4	4.4	292.26	0	8.2716	31969000	8	Q02388-2;Q02388	Q02388-2;Q02388	Collagen alpha-1(VII) chain	COL7A1	1410
24.9173	23.4548	23.3222	23.3363	NaN	26.9998	26.0242	22.8389	23.3827	13	13	13	52.3	52.3	52.3	20.762	0	80.48	1659700000	82	Q02543	Q02543	60S ribosomal protein L18a	RPL18A	1411
NaN	NaN	NaN	NaN	NaN	19.0571	NaN	20.0667	21.2039	2	2	2	6.8	6.8	6.8	40.763	0	3.5721	30727000	2	Q02750-2;Q02750;P36507	Q02750-2;Q02750;P36507	Dual specificity mitogen-activated protein kinase kinase 1;Dual specificity mitogen-activated protein kinase kinase 2	MAP2K1;MAP2K2	1412
NaN	NaN	NaN	NaN	NaN	NaN	NaN	NaN	21.1117	1	1	1	3.3	3.3	3.3	51.804	0.0014717	2.01	34866000	1	Q02790	Q02790	Peptidyl-prolyl cis-trans isomerase FKBP4;Peptidyl-prolyl cis-trans isomerase FKBP4, N-terminally processed	FKBP4	1413
22.2018	NaN	NaN	23.0978	NaN	25.3248	NaN	NaN	21.5892	14	14	14	29.2	29.2	29.2	83.549	0	121.29	287870000	21	Q02809;Q02809-2	Q02809;Q02809-2	Procollagen-lysine,2-oxoglutarate 5-dioxygenase 1	PLOD1	1414
NaN	NaN	NaN	21.7074	NaN	20.7735	NaN	20.6161	20.9205	2	2	2	5.6	5.6	5.6	53.879	0	3.7178	46941000	4	Q02818	Q02818	Nucleobindin-1	NUCB1	1415
26.7488	25.1706	25.2364	25.2796	23.5924	27.8302	26.9848	24.8115	24.9094	11	11	11	34	34	34	32.728	0	323.31	3730700000	166	Q02878	Q02878	60S ribosomal protein L6	RPL6	1416
NaN	NaN	NaN	NaN	NaN	21.6769	NaN	NaN	NaN	5	5	3	3.3	3.3	1.7	182.66	0	6.892	21964000	5	Q02880-2;Q02880	Q02880-2;Q02880	DNA topoisomerase 2-beta	TOP2B	1417
NaN	NaN	NaN	NaN	NaN	NaN	NaN	NaN	19.6126	1	1	1	0.6	0.6	0.6	180.99	0	5.0424	9864700	2	Q02952-3;Q02952-2;Q02952	Q02952-3;Q02952-2;Q02952	A-kinase anchor protein 12	AKAP12	1418
NaN	NaN	NaN	NaN	NaN	NaN	NaN	NaN	20.516	1	1	1	6.1	6.1	6.1	28.494	0.003187	1.8041	32678000	2	Q02978-2;Q02978	Q02978-2;Q02978	Mitochondrial 2-oxoglutarate/malate carrier protein	SLC25A11	1419
NaN	NaN	NaN	NaN	NaN	NaN	NaN	NaN	NaN	1	1	1	6.7	6.7	6.7	25.379	0.0028643	1.8507	16867000	2	Q03001-11	Q03001-11	Dystonin	DST	1420
24.6346	26.9716	26.5535	26.3909	25.9676	24.6393	24.8069	26.8521	24.7262	4	4	4	25.8	25.8	25.8	20.471	0	180.07	2425000000	59	Q03135	Q03135	Caveolin-1	CAV1	1421
NaN	NaN	NaN	NaN	NaN	NaN	NaN	24.5776	22.7598	1	1	1	10.2	10.2	10.2	17.023	0	160.56	575230000	15	Q03135-2	Q03135-2	Caveolin-1	CAV1	1422
25.1328	26.7617	26.8847	23.5633	25.7556	27.2943	25.8113	25.8052	25.7128	26	24	24	46.6	43.7	43.7	69.948	0	323.31	2931000000	128	Q03252	Q03252	Lamin-B2	LMNB2	1423
NaN	22.2795	21.6015	24.8666	25.1162	NaN	24.9117	28.1126	25.9208	10	10	10	35.5	35.5	35.5	36.978	0	323.31	2578300000	66	Q03405;Q03405-3;Q03405-2	Q03405;Q03405-3;Q03405-2	Urokinase plasminogen activator surface receptor	PLAUR	1424
NaN	NaN	NaN	NaN	NaN	NaN	NaN	NaN	20.4359	1	1	1	5.3	5.3	5.3	42.45	0.0028582	1.843	34235000	2	Q03426	Q03426	Mevalonate kinase	MVK	1425
NaN	23.9384	23.5277	25.0283	24.5857	23.707	23.274	23.8407	23.756	10	10	10	20.8	20.8	20.8	87.217	0	100	536060000	36	Q03518	Q03518	Antigen peptide transporter 1	TAP1	1426
NaN	NaN	NaN	22.4905	21.8205	NaN	NaN	21.4991	NaN	2	2	2	4.6	4.6	4.6	72.002	0	4.2189	59361000	2	Q03519-2;Q03519	Q03519-2;Q03519	Antigen peptide transporter 2	TAP2	1427
23.5177	NaN	NaN	22.1497	NaN	23.4759	23.4774	NaN	NaN	6	6	6	9.5	9.5	9.5	120.97	0	10.779	227730000	14	Q03701	Q03701	CCAAT/enhancer-binding protein zeta	CEBPZ	1428
NaN	NaN	NaN	NaN	NaN	NaN	NaN	NaN	21.8816	3	3	3	21.9	21.9	21.9	33.325	0	9.5586	32476000	4	Q04323;Q04323-2	Q04323;Q04323-2	UBX domain-containing protein 1	UBXN1	1429
NaN	NaN	NaN	NaN	NaN	NaN	21.1501	NaN	21.4974	4	4	4	6.7	6.7	6.7	80.473	0	4.9489	51431000	3	Q04446	Q04446	1,4-alpha-glucan-branching enzyme	GBE1	1430
24.2854	24.3333	24.1334	24.4918	24.806	25.1025	25.7635	25.2927	24.0264	13	13	13	14.1	14.1	14.1	158.52	0	164.19	1109900000	80	Q04637-5;Q04637-4;Q04637-3;Q04637;Q04637-9;Q04637-6;Q04637-8;Q04637-7;O43432-4;O43432;O43432-3	Q04637-5;Q04637-4;Q04637-3;Q04637;Q04637-9;Q04637-6;Q04637-8;Q04637-7	Eukaryotic translation initiation factor 4 gamma 1	EIF4G1	1431
23.006	22.4465	NaN	24.0024	23.6493	24.0557	22.6533	23.5308	23.132	12	12	12	8.2	8.2	8.2	265.4	0	24.516	380950000	26	Q04721	Q04721	Neurogenic locus notch homolog protein 2;Notch 2 extracellular truncation;Notch 2 intracellular domain	NOTCH2	1432
NaN	NaN	NaN	23.3616	23.2674	NaN	NaN	24.2101	22.3901	4	4	4	7.7	7.7	7.7	57.152	0	19.384	215660000	9	Q04771	Q04771	Activin receptor type-1	ACVR1	1433
21.0087	NaN	NaN	22.728	NaN	NaN	24.1689	23.7425	25.8565	10	10	5	39.6	39.6	14.2	36.788	0	47.667	486110000	26	Q04828;P42330;P17516;P42330-2	Q04828;P42330	Aldo-keto reductase family 1 member C1;Aldo-keto reductase family 1 member C3	AKR1C1;AKR1C3	1434
22.3873	22.9594	NaN	24.0256	22.5517	22.3756	22.6852	NaN	22.7937	5	5	5	46.6	46.6	46.6	17.259	0	10.784	161850000	13	Q04837	Q04837	Single-stranded DNA-binding protein, mitochondrial	SSBP1	1435
22.3655	22.8815	22.5544	23.6219	22.7752	21.5517	NaN	23.1258	24.0249	6	4	4	26.4	24	24	28.218	0	7.0539	275720000	10	Q04917	Q04917	14-3-3 protein eta	YWHAH	1436
NaN	NaN	NaN	NaN	NaN	NaN	NaN	20.5903	NaN	1	1	1	10.3	10.3	10.3	15.946	0.0068353	1.564	9973400	2	Q04941-2;Q04941	Q04941-2;Q04941	Proteolipid protein 2	PLP2	1437
NaN	NaN	NaN	NaN	NaN	21.0646	NaN	NaN	21.8204	3	3	3	14.2	14.2	14.2	48.357	0	5.2743	38684000	3	Q05048	Q05048	Cleavage stimulation factor subunit 1	CSTF1	1438
NaN	NaN	NaN	NaN	NaN	21.9056	NaN	NaN	NaN	2	2	2	7	7	7	53.413	0.0007902	2.5055	29249000	2	Q05519-2;Q05519	Q05519-2;Q05519	Serine/arginine-rich splicing factor 11	SRSF11	1439
23.9219	24.934	23.3099	25.0996	26.0893	26.9741	25.2263	24.6801	25.1476	9	9	9	22.6	22.6	22.6	61.212	0	206.99	2404200000	75	Q05682-5;Q05682-4;Q05682-3;Q05682-6;Q05682-2;Q05682	Q05682-5;Q05682-4;Q05682-3;Q05682-6;Q05682-2;Q05682	Caldesmon	CALD1	1440
22.3551	22.6875	NaN	22.3135	23.1461	22.8079	NaN	NaN	NaN	5	5	5	6.1	6.1	6.1	183.15	0	8.0611	106690000	9	Q05707-3;Q05707-2;Q05707	Q05707-3;Q05707-2;Q05707	Collagen alpha-1(XIV) chain	COL14A1	1441
NaN	NaN	NaN	21.8205	NaN	NaN	NaN	21.5896	NaN	2	2	2	7.4	7.4	7.4	59.173	0	6.423	51773000	2	Q05932-3;Q05932-2;Q05932-4;Q05932	Q05932-3;Q05932-2;Q05932-4;Q05932	Folylpolyglutamate synthase, mitochondrial	FPGS	1442
21.4766	21.8967	NaN	21.2628	NaN	NaN	21.2196	22.7406	23.1099	4	4	4	11.6	11.6	11.6	68.436	0	12.787	139700000	9	Q06124-1;Q06124;Q06124-3	Q06124-1;Q06124;Q06124-3	Tyrosine-protein phosphatase non-receptor type 11	PTPN11	1443
NaN	NaN	NaN	NaN	NaN	NaN	NaN	NaN	20.7455	1	1	1	6	6	6	29.159	0.00075614	2.1601	19660000	1	Q06136-2;Q06136	Q06136-2;Q06136	3-ketodihydrosphingosine reductase	KDSR	1444
NaN	NaN	NaN	NaN	NaN	NaN	NaN	22.5218	23.131	4	4	4	10.3	10.3	10.3	57.398	0	10.331	98750000	5	Q06203	Q06203	Amidophosphoribosyltransferase	PPAT	1445
21.7804	21.9447	NaN	21.9408	NaN	21.8828	22.0871	22.5811	22.7564	4	4	3	6.9	6.9	5.6	76.758	0	16.487	187990000	12	Q06210-2;Q06210	Q06210-2;Q06210	Glutamine--fructose-6-phosphate aminotransferase [isomerizing] 1	GFPT1	1446
NaN	NaN	NaN	NaN	NaN	NaN	NaN	NaN	NaN	1	1	1	4.2	4.2	4.2	37.655	0.0093865	1.4458	0	1	Q99496;Q06587-2;Q06587	Q99496;Q06587-2;Q06587	E3 ubiquitin-protein ligase RING2;E3 ubiquitin-protein ligase RING1	RNF2;RING1	1447
21.6513	21.7236	NaN	NaN	NaN	22.533	NaN	21.7357	NaN	4	3	3	10.9	9.6	9.6	66.245	0	34.435	77357000	12	Q06787-8;Q06787-6;Q06787-2;Q06787-4;Q06787-5;Q06787-9;Q06787-7;Q06787-3;Q06787;Q06787-11;Q06787-10	Q06787-8;Q06787-6;Q06787-2;Q06787-4;Q06787-5;Q06787-9;Q06787-7;Q06787-3;Q06787;Q06787-11;Q06787-10	Fragile X mental retardation protein 1	FMR1	1448
27.9581	30.6877	28.9719	30.6363	31.8578	29.7841	27.9852	31.424	30.9866	29	29	26	79.4	79.4	79.4	22.11	0	323.31	56047000000	949	Q06830	Q06830	Peroxiredoxin-1	PRDX1	1449
25.2336	23.0335	24.086	23.724	NaN	27.1433	26.0003	22.0165	23.637	10	10	10	39	39	39	18.091	0	160.94	2030500000	67	Q07020-2;Q07020	Q07020-2;Q07020	60S ribosomal protein L18	RPL18	1450
NaN	NaN	NaN	22.7732	NaN	22.3284	22.328	NaN	22.2134	3	3	3	16	16	16	31.362	0	44.968	135840000	30	Q07021	Q07021	Complement component 1 Q subcomponent-binding protein, mitochondrial	C1QBP	1451
26.9241	26.7397	26.0664	26.2181	27.1883	27.4558	26.4343	26.2128	27.5442	34	34	34	62.6	62.6	62.6	66.022	0	323.31	5494700000	277	Q07065	Q07065	Cytoskeleton-associated protein 4	CKAP4	1452
NaN	NaN	NaN	NaN	22.8845	23.9421	NaN	NaN	NaN	6	6	6	4.8	4.8	4.8	157.56	0	18.281	123440000	14	Q07092-2;Q07092	Q07092-2;Q07092	Collagen alpha-1(XVI) chain	COL16A1	1453
22.0058	NaN	NaN	NaN	NaN	22.2118	NaN	NaN	NaN	6	6	6	8.2	8.2	8.2	186.96	0	28.406	103640000	8	Q07157-2;Q07157	Q07157-2;Q07157	Tight junction protein ZO-1	TJP1	1454
NaN	NaN	NaN	20.9885	NaN	NaN	NaN	NaN	NaN	2	2	2	11.2	11.2	11.2	36.313	0	3.7795	13454000	2	Q07352;P47974	Q07352;P47974	Zinc finger protein 36, C3H1 type-like 1;Zinc finger protein 36, C3H1 type-like 2	ZFP36L1;ZFP36L2	1455
25.1932	22.1626	23.3108	23.6044	22.2133	26.2115	25.5095	23.148	23.1994	7	7	7	26.2	26.2	26.2	48.227	0	43.521	982850000	53	Q07666;Q07666-2;Q07666-3;Q5VWX1	Q07666;Q07666-2	KH domain-containing, RNA-binding, signal transduction-associated protein 1	KHDRBS1	1456
NaN	22.6954	23.2205	22.3199	22.779	NaN	NaN	22.053	NaN	4	4	4	29.3	29.3	29.3	18.129	0	18.516	98683000	13	Q07812-5;Q07812-7;Q07812-8;Q07812;Q07812-2	Q07812-5;Q07812-7;Q07812-8;Q07812;Q07812-2	Apoptosis regulator BAX	BAX	1457
24.4019	23.3104	21.8549	23.4342	23.7256	23.7894	24.9606	25.3669	25.4212	23	23	23	7.8	7.8	7.8	504.6	0	97.955	881170000	78	Q07954;Q07954-2	Q07954	Prolow-density lipoprotein receptor-related protein 1;Low-density lipoprotein receptor-related protein 1 85 kDa subunit;Low-density lipoprotein receptor-related protein 1 515 kDa subunit;Low-density lipoprotein receptor-related protein 1 intracellular domain	LRP1	1458
NaN	NaN	NaN	NaN	NaN	22.3853	NaN	NaN	NaN	4	3	3	24.9	21.4	21.4	22.46	0	13.415	46133000	6	Q07955-3;Q07955;Q07955-2	Q07955-3;Q07955;Q07955-2	Serine/arginine-rich splicing factor 1	SRSF1	1459
21.7765	NaN	NaN	NaN	NaN	23.2329	21.7054	NaN	20.3196	4	2	2	5.9	3.2	3.2	56.678	0	4.2702	96381000	9	Q08170	Q08170	Serine/arginine-rich splicing factor 4	SRSF4	1460
NaN	NaN	NaN	21.2142	NaN	22.1497	NaN	22.3084	21.3438	2	2	2	6.6	6.6	6.6	51.245	0	4.0764	101260000	4	Q08209-5;Q08209-2;Q08209;Q08209-4;Q08209-3;P48454-2;P48454;P16298-2;P16298-3;P48454-3;P16298;P16298-4	Q08209-5;Q08209-2;Q08209;Q08209-4;Q08209-3;P48454-2;P48454;P16298-2;P16298-3;P48454-3;P16298;P16298-4	Serine/threonine-protein phosphatase 2B catalytic subunit alpha isoform;Serine/threonine-protein phosphatase 2B catalytic subunit gamma isoform;Serine/threonine-protein phosphatase 2B catalytic subunit beta isoform	PPP3CA;PPP3CC;PPP3CB	1461
27.2904	21.5316	NaN	24.33	NaN	27.2183	27.22	23.7016	24.8376	39	39	39	36.9	36.9	36.9	140.96	0	323.31	2726100000	252	Q08211;Q08211-2	Q08211	ATP-dependent RNA helicase A	DHX9	1462
NaN	NaN	NaN	NaN	NaN	NaN	NaN	NaN	20.0671	1	1	1	4.4	4.4	4.4	31.528	0.00078034	2.4309	7882000	1	Q08257-3;Q08257	Q08257-3;Q08257	Quinone oxidoreductase	CRYZ	1463
NaN	NaN	NaN	21.7299	21.2128	NaN	NaN	21.771	21.4891	2	2	2	8	8	8	70.392	0	11.733	62040000	8	Q08357	Q08357	Sodium-dependent phosphate transporter 2	SLC20A2	1464
21.6449	22.0344	NaN	21.7337	21.7291	23.2444	22.477	NaN	20.5833	4	4	4	6.4	6.4	6.4	113.08	0	15.24	161700000	15	Q08379;Q08379-2;Q9NVV4-2	Q08379;Q08379-2	Golgin subfamily A member 2	GOLGA2	1466
NaN	NaN	NaN	20.6342	NaN	21.7892	21.5791	NaN	NaN	3	3	3	9.1	9.1	9.1	65.33	0	4.2966	38000000	6	Q08380	Q08380	Galectin-3-binding protein	LGALS3BP	1467
NaN	NaN	NaN	19.3625	NaN	NaN	NaN	NaN	NaN	1	1	1	3.6	3.6	3.6	31.185	0.0067912	1.5169	6770600	2	Q08431-2;Q08431-3;Q08431-4;Q08431	Q08431-2;Q08431-3;Q08431-4;Q08431	Lactadherin;Lactadherin short form;Medin	MFGE8	1468
NaN	NaN	NaN	NaN	NaN	NaN	NaN	NaN	NaN	1	1	1	3.7	3.7	3.7	23.839	0.00075901	2.1853	1556400000	105	Q08499-7;Q08499-12;Q08499-6	Q08499-7;Q08499-12;Q08499-6			1469
NaN	NaN	NaN	24.9153	23.3907	NaN	NaN	23.6048	NaN	3	3	3	9.9	9.9	9.9	35.213	0	34.361	255190000	8	Q08722;Q08722-2;Q08722-3;Q08722-4	Q08722;Q08722-2;Q08722-3;Q08722-4	Leukocyte surface antigen CD47	CD47	1470
NaN	NaN	NaN	NaN	NaN	NaN	NaN	19.2684	NaN	2	2	2	7.6	7.6	7.6	40.763	0	5.2167	14601000	4	Q08752	Q08752	Peptidyl-prolyl cis-trans isomerase D	PPID	1471
19.6537	NaN	NaN	19.1706	NaN	26.6369	NaN	NaN	20.5973	18	18	18	34.1	34.1	34.1	81.074	0	206.01	503880000	23	Q08945	Q08945	FACT complex subunit SSRP1	SSRP1	1472
NaN	NaN	NaN	NaN	NaN	NaN	NaN	NaN	21.6737	2	2	2	8.3	8.3	8.3	38.102	0	7.6012	56510000	3	Q08AF3-2;Q08AF3	Q08AF3-2;Q08AF3	Schlafen family member 5	SLFN5	1473
22.73	23.0295	NaN	24.5387	NaN	23.2277	23.716	23.6416	24.4282	3	3	3	7.7	7.7	7.7	87.972	0	6.6171	463420000	9	Q08AM6	Q08AM6	Protein VAC14 homolog	VAC14	1474
26.1472	23.8153	NaN	24.1582	23.1294	25.8139	25.0005	23.5443	24.5156	8	5	5	32.4	27.8	27.8	46.158	0	143.84	1036200000	44	Q09028-3;Q09028;Q09028-2;Q09028-4	Q09028-3;Q09028;Q09028-2;Q09028-4	Histone-binding protein RBBP4	RBBP4	1475
28.3883	27.2913	27.4953	29.5868	26.7009	28.3364	28.8793	27.3376	29.5737	122	122	122	35.5	35.5	35.5	629.09	0	323.31	13639000000	493	Q09666;Q09666-2	Q09666	Neuroblast differentiation-associated protein AHNAK	AHNAK	1476
21.5184	NaN	NaN	22.8848	NaN	21.6557	21.6602	22.1499	21.3554	5	5	5	13.5	13.5	13.5	64.732	0	15.305	124200000	8	Q10471;Q10471-2	Q10471	Polypeptide N-acetylgalactosaminyltransferase 2;Polypeptide N-acetylgalactosaminyltransferase 2 soluble form	GALNT2	1478
22.3094	NaN	NaN	NaN	NaN	21.4205	22.622	NaN	21.8168	6	6	6	8.9	8.9	8.9	160.88	0	24.683	55156000	6	Q10570	Q10570	Cleavage and polyadenylation specificity factor subunit 1	CPSF1	1479
NaN	NaN	NaN	NaN	NaN	NaN	NaN	21.1669	NaN	2	2	2	11.2	11.2	11.2	29.326	0	3.2788	14874000	2	Q10588-2;Q10588	Q10588-2;Q10588	ADP-ribosyl cyclase/cyclic ADP-ribose hydrolase 2	BST1	1480
NaN	NaN	NaN	NaN	21.898	NaN	NaN	22.7046	22.4316	2	2	2	9.5	9.5	9.5	38.863	0.00075358	2.1418	113690000	8	Q12765-3;Q12765;Q12765-2	Q12765-3;Q12765;Q12765-2	Secernin-1	SCRN1	1481
NaN	NaN	NaN	NaN	NaN	NaN	NaN	NaN	NaN	1	1	1	1.3	1.3	1.3	162.12	0.00076017	2.189	10006000	1	Q12769	Q12769	Nuclear pore complex protein Nup160	NUP160	1482
22.7496	NaN	NaN	NaN	NaN	23.204	23.5912	NaN	NaN	9	9	9	17.3	17.3	17.3	89.034	0	71.005	175440000	23	Q12788	Q12788	Transducin beta-like protein 3	TBL3	1483
NaN	NaN	NaN	NaN	21.0951	NaN	NaN	22.1006	NaN	3	3	3	3.3	3.3	3.3	134.36	0	4.5606	41303000	3	Q12791-4;Q12791-7;Q12791-5;Q12791-2;Q12791;Q12791-3	Q12791-4;Q12791-7;Q12791-5;Q12791-2;Q12791;Q12791-3	Calcium-activated potassium channel subunit alpha-1	KCNMA1	1484
NaN	21.9475	NaN	NaN	21.9512	21.2546	NaN	22.3509	22.9607	4	4	4	18.9	18.9	18.9	40.282	0	21.545	139440000	6	Q12792;Q12792-4;Q12792-3	Q12792;Q12792-4;Q12792-3	Twinfilin-1	TWF1	1485
24.9501	23.7993	23.6323	25.0423	25.2463	25.3425	26.8381	25.5017	26.0313	25	25	25	34.2	34.2	34.2	83.267	0	135.8	1821800000	106	Q12797-10;Q12797;Q12797-9;Q12797-6;Q12797-11;Q12797-5;Q12797-8;Q12797-2;Q12797-7;Q12797-4;Q12797-3	Q12797-10;Q12797	Aspartyl/asparaginyl beta-hydroxylase	ASPH	1486
NaN	NaN	NaN	NaN	NaN	21.5776	NaN	NaN	NaN	2	2	2	8	8	8	51.307	0	15.854	23320000	2	Q12800-2;Q12800-3;Q12800-4;Q12800;Q9NZI7-4;Q9NZI7	Q12800-2;Q12800-3;Q12800-4;Q12800;Q9NZI7-4;Q9NZI7	Alpha-globin transcription factor CP2;Upstream-binding protein 1	TFCP2;UBP1	1487
NaN	NaN	NaN	NaN	NaN	NaN	NaN	NaN	NaN	2	2	2	9	9	9	43.158	0	8.0485	25837000	1	Q12824-2;Q12824	Q12824-2;Q12824	SWI/SNF-related matrix-associated actin-dependent regulator of chromatin subfamily B member 1	SMARCB1	1488
NaN	NaN	NaN	NaN	NaN	NaN	NaN	NaN	21.5866	3	3	3	22.9	22.9	22.9	34.18	0	56.079	107730000	5	Q12846;Q12846-2	Q12846;Q12846-2	Syntaxin-4	STX4	1489
24.1621	22.6304	NaN	23.6337	22.8299	23.486	23.6192	21.7478	23.3366	6	6	6	14	14	14	58.848	0	142.41	297980000	19	Q12874	Q12874	Splicing factor 3A subunit 3	SF3A3	1490
NaN	NaN	NaN	NaN	NaN	NaN	NaN	21.7306	NaN	2	2	2	2.2	2.2	2.2	87.711	0	2.8319	39601000	5	Q12884;Q12884-2	Q12884;Q12884-2	Prolyl endopeptidase FAP;Antiplasmin-cleaving enzyme FAP, soluble form	FAP	1491
23.4878	NaN	NaN	NaN	NaN	21.9552	23.2547	NaN	21.3628	9	9	9	6.7	6.7	6.7	213.57	0	16.921	120510000	27	Q12888;Q12888-3;Q12888-2	Q12888;Q12888-3;Q12888-2	Tumor suppressor p53-binding protein 1	TP53BP1	1492
NaN	NaN	NaN	NaN	NaN	NaN	NaN	22.2762	NaN	2	2	2	8.7	8.7	8.7	53.859	0	3.1973	32385000	2	Q12891	Q12891	Hyaluronidase-2	HYAL2	1493
NaN	NaN	NaN	NaN	NaN	22.9862	NaN	NaN	NaN	2	2	2	12.5	12.5	12.5	34.352	0	12.329	130110000	5	Q12904;Q12904-2	Q12904;Q12904-2	Aminoacyl tRNA synthase complex-interacting multifunctional protein 1;Endothelial monocyte-activating polypeptide 2	AIMP1	1494
25.1936	NaN	NaN	23.2162	NaN	26.9299	25.1172	23.6035	24.8079	18	18	18	55.9	55.9	55.9	43.062	0	226.82	1340300000	83	Q12905	Q12905	Interleukin enhancer-binding factor 2	ILF2	1495
27.5644	23.0712	NaN	25.8294	22.6014	27.7395	27.8542	25.7027	26.2441	19	19	19	38	38	38	95.807	0	323.31	3534700000	123	Q12906-7;Q12906;Q12906-4;Q12906-6;Q12906-5;Q12906-2;Q12906-3	Q12906-7;Q12906;Q12906-4;Q12906-6;Q12906-5;Q12906-2;Q12906-3	Interleukin enhancer-binding factor 3	ILF3	1496
NaN	NaN	NaN	NaN	NaN	NaN	NaN	NaN	22.2016	1	1	1	9.3	9.3	9.3	40.228	0	7.572	124310000	4	Q12907	Q12907	Vesicular integral-membrane protein VIP36	LMAN2	1497
NaN	NaN	NaN	NaN	NaN	NaN	NaN	NaN	NaN	1	1	1	1.6	1.6	1.6	56.212	0.0014577	1.9656	11916000000	36	Q12912-2;Q12912	Q12912-2;Q12912	Lymphoid-restricted membrane protein;Processed lymphoid-restricted membrane protein	LRMP	1498
NaN	NaN	NaN	NaN	NaN	NaN	NaN	19.7976	NaN	2	2	2	8	8	8	62.87	0	3.0713	11847000	3	Q12929-2;Q12929	Q12929-2;Q12929	Epidermal growth factor receptor kinase substrate 8	EPS8	1499
NaN	NaN	NaN	NaN	NaN	NaN	NaN	NaN	21.7515	4	4	4	8.4	8.4	8.4	74.267	0	4.2328	36889000	3	Q12931-2;Q12931	Q12931-2;Q12931	Heat shock protein 75 kDa, mitochondrial	TRAP1	1500
NaN	NaN	NaN	NaN	NaN	21.291	NaN	NaN	NaN	3	3	3	6.9	6.9	6.9	95.165	0	6.044	30501000	3	Q12959-5;Q12959-3;Q12959-6;Q12959-4;Q12959;Q12959-7;Q12959-2;Q12959-8;Q12959-9	Q12959-5;Q12959-3;Q12959-6;Q12959-4;Q12959;Q12959-7;Q12959-2	Disks large homolog 1	DLG1	1501
NaN	NaN	NaN	NaN	NaN	NaN	NaN	NaN	NaN	5	5	5	6.6	6.6	6.6	127.06	0	7.1443	47581000	7	Q12965	Q12965	Unconventional myosin-Ie	MYO1E	1502
NaN	NaN	NaN	NaN	NaN	NaN	NaN	NaN	NaN	1	1	1	18.3	18.3	18.3	9.2406	0.00078217	2.4428	8158100	1	Q12974-2;Q12974-3;Q12974-4;Q12974	Q12974-2;Q12974-3;Q12974-4;Q12974	Protein tyrosine phosphatase type IVA 2	PTP4A2	1503
NaN	NaN	NaN	20.2288	NaN	NaN	NaN	NaN	NaN	2	2	2	17.5	17.5	17.5	26.132	0.00076599	2.2632	5120300	1	Q12981;Q12981-1;Q12981-2;Q12981-3	Q12981;Q12981-1;Q12981-2;Q12981-3	Vesicle transport protein SEC20	BNIP1	1504
22.9803	23.0246	NaN	23.3913	NaN	22.0327	23.2089	NaN	21.816	4	4	4	9.5	9.5	9.5	35.816	0	15.957	116070000	15	Q13011	Q13011	Delta(3,5)-Delta(2,4)-dienoyl-CoA isomerase, mitochondrial	ECH1	1505
NaN	NaN	22.4318	22.579	NaN	NaN	22.0889	21.3673	22.5546	5	5	5	100	100	100	10.061	0	21.749	97977000	7	Q13015	Q13015	Protein AF1q	MLLT11	1506
NaN	NaN	NaN	NaN	NaN	NaN	NaN	NaN	NaN	2	2	2	4.1	4.1	4.1	77.744	0.0007716	2.3163	13380000	1	Q13033-2;Q13033	Q13033-2;Q13033	Striatin-3	STRN3	1507
NaN	NaN	NaN	21.5394	NaN	20.8427	NaN	NaN	NaN	3	3	3	3.4	3.4	3.4	138.49	0	8.2601	44852000	5	Q13045-2;Q13045;Q13045-3	Q13045-2;Q13045;Q13045-3	Protein flightless-1 homolog	FLII	1508
NaN	22.2914	NaN	23.8577	22.5152	NaN	NaN	22.1084	23.2433	6	6	6	18.4	18.4	18.4	62.328	0	9.7908	220970000	7	Q13057;Q13057-2	Q13057;Q13057-2	Bifunctional coenzyme A synthase;Phosphopantetheine adenylyltransferase;Dephospho-CoA kinase	COASY	1509
NaN	23.0587	NaN	23.1078	23.1429	NaN	NaN	22.3316	NaN	2	2	2	1.7	1.7	1.7	265.55	0	8.8158	139900000	5	Q13085;Q13085-3;Q13085-2;Q13085-4	Q13085;Q13085-3;Q13085-2;Q13085-4	Acetyl-CoA carboxylase 1;Biotin carboxylase	ACACA	1510
23.8858	NaN	NaN	NaN	NaN	23.5339	23.5992	NaN	NaN	8	8	8	20.6	20.6	20.6	65.601	0	40.701	153890000	25	Q13123	Q13123	Protein Red	IK	1511
21.8946	21.7727	21.7955	23.453	22.5771	21.5124	22.1493	22.4228	21.9778	4	4	4	11.1	11.1	11.1	65.522	0	5.7683	161720000	14	Q13131-2;Q13131;P54646	Q13131-2;Q13131;P54646	5-AMP-activated protein kinase catalytic subunit alpha-1;5-AMP-activated protein kinase catalytic subunit alpha-2	PRKAA1;PRKAA2	1512
NaN	NaN	NaN	20.8169	NaN	21.9652	21.5155	NaN	21.1606	2	2	2	4.2	4.2	4.2	133.97	0	5.6605	80691000	3	Q13136-2;Q13136	Q13136-2;Q13136	Liprin-alpha-1	PPFIA1	1513
NaN	NaN	NaN	22.757	22.9141	NaN	NaN	22.0885	22.6174	3	3	3	7.6	7.6	7.6	80.379	0	5.5438	128800000	5	Q13144	Q13144	Translation initiation factor eIF-2B subunit epsilon	EIF2B5	1514
23.6561	23.2507	23.6212	24.8791	23.8784	24.1299	23.4507	24.3767	24.6306	8	8	8	28	28	28	44.739	0	323.31	748690000	65	Q13148;Q13148-4	Q13148	TAR DNA-binding protein 43	TARDBP	1515
23.2838	NaN	NaN	21.793	NaN	25.1064	23.3757	NaN	NaN	4	4	4	25.9	25.9	25.9	30.84	0	62.171	253330000	7	Q13151	Q13151	Heterogeneous nuclear ribonucleoprotein A0	HNRNPA0	1516
NaN	NaN	NaN	21.5979	NaN	22.8261	NaN	21.9365	21.4475	3	1	1	12.2	7.7	7.7	30.54	0	3.1931	109440000	9	Q13162	Q13162	Peroxiredoxin-4	PRDX4	1517
NaN	NaN	NaN	NaN	NaN	NaN	NaN	NaN	NaN	2	2	2	4.6	4.6	4.6	73.217	0	2.792	39825000	2	Q13164-2;Q13164	Q13164-2;Q13164	Mitogen-activated protein kinase 7	MAPK7	1518
22.5971	22.3213	22.6378	23.0427	22.3566	NaN	22.7705	22.3061	22.7822	6	6	6	22.3	22.3	22.3	58.042	0	10.886	151880000	11	Q13177;O75914-2;Q13153;Q13153-2;O75914;O75914-4;O75914-3	Q13177	Serine/threonine-protein kinase PAK 2;PAK-2p27;PAK-2p34	PAK2	1519
NaN	NaN	NaN	NaN	NaN	NaN	NaN	NaN	NaN	1	1	1	12	12	12	20.811	0	3.9211	52156000	2	Q13185	Q13185	Chromobox protein homolog 3	CBX3	1520
26.5848	28.0716	28.8489	26.5163	28.2152	23.9455	27.6638	26.3572	24.8948	14	14	3	57	57	16.2	35.473	0	323.31	4150000000	183	Q13190-4;Q13190	Q13190-4;Q13190	Syntaxin-5	STX5	1521
NaN	NaN	NaN	NaN	NaN	NaN	NaN	NaN	NaN	12	1	1	50.2	5.2	5.2	29.887	0.0007764	2.3797	13854000	1	Q13190-3;Q13190-2	Q13190-3;Q13190-2	Syntaxin-5	STX5	1522
NaN	21.8477	NaN	NaN	21.8987	22.0318	NaN	23.2922	24.1218	4	4	4	10.7	10.7	10.7	100.2	0	23.123	264270000	13	Q13200;Q13200-3;Q13200-2	Q13200;Q13200-3;Q13200-2	26S proteasome non-ATPase regulatory subunit 2	PSMD2	1523
NaN	NaN	NaN	NaN	NaN	22.0926	22.7339	NaN	NaN	6	6	6	10.1	10.1	10.1	100.89	0	5.8299	69587000	8	Q13206	Q13206	Probable ATP-dependent RNA helicase DDX10	DDX10	1524
NaN	NaN	NaN	NaN	NaN	NaN	NaN	NaN	20.0189	1	1	1	4.6	4.6	4.6	57.579	0.0011253	2.1045	26595000	1	Q13217	Q13217	DnaJ homolog subfamily C member 3	DNAJC3	1525
NaN	NaN	NaN	NaN	NaN	NaN	NaN	NaN	NaN	3	3	3	4.2	4.2	4.2	45.348	0	19.26	91655000	9	Q13228-2;Q13228;Q13228-4	Q13228-2;Q13228;Q13228-4	Selenium-binding protein 1	SELENBP1	1526
22.7338	22.3608	NaN	NaN	NaN	24.3307	23.1724	NaN	21.728	7	7	6	30.8	30.8	30.8	25.542	0	16.903	204660000	16	Q13242	Q13242	Serine/arginine-rich splicing factor 9	SRSF9	1527
22.2125	NaN	NaN	NaN	NaN	23.2792	NaN	NaN	NaN	3	2	2	11.2	11.2	11.2	30.858	0	14.972	102800000	8	Q13243-3;Q13243	Q13243-3;Q13243	Serine/arginine-rich splicing factor 5	SRSF5	1528
24.2378	NaN	NaN	21.3962	NaN	24.6016	23.1336	NaN	23.2075	4	4	2	14.6	14.6	10.7	38.418	0	18.376	332210000	21	Q13247-3;Q13247	Q13247-3;Q13247	Serine/arginine-rich splicing factor 6	SRSF6	1529
25.211	23.6091	23.6651	25.3238	23.6311	24.9515	24.7201	23.1233	24.8281	13	13	13	29.7	29.7	29.7	88.549	0	250.01	796260000	64	Q13263;Q13263-2	Q13263;Q13263-2	Transcription intermediary factor 1-beta	TRIM28	1530
NaN	NaN	NaN	NaN	NaN	22.8025	NaN	NaN	NaN	5	5	5	19.6	19.6	19.6	29.926	0	6.0837	55042000	5	Q13268;Q13268-2	Q13268;Q13268-2	Dehydrogenase/reductase SDR family member 2, mitochondrial	DHRS2	1531
22.249	21.7692	NaN	21.8195	NaN	22.3192	21.9419	20.9811	NaN	5	5	3	18.2	18.2	14.8	52.164	0	9.7577	115900000	14	Q13283;Q13283-2	Q13283;Q13283-2	Ras GTPase-activating protein-binding protein 1	G3BP1	1532
26.4108	28.4783	26.3311	27.3893	26.7563	24.6	NaN	NaN	NaN	25	25	25	32.7	32.7	32.7	118.39	0	323.31	2142500000	118	Q13308;Q13308-6;Q13308-4;Q13308-2;Q13308-3;Q13308-5	Q13308;Q13308-6;Q13308-4;Q13308-2;Q13308-3;Q13308-5	Inactive tyrosine-protein kinase 7	PTK7	1533
NaN	NaN	NaN	NaN	NaN	NaN	NaN	NaN	NaN	4	1	1	8.4	2.2	2.2	69.578	0	2.6092	27937000	4	Q13310-2;Q13310;Q13310-3	Q13310-2;Q13310;Q13310-3	Polyadenylate-binding protein 4	PABPC4	1534
NaN	NaN	NaN	NaN	NaN	NaN	NaN	NaN	NaN	1	1	1	3.7	3.7	3.7	60.847	0.00076982	2.3066	16472000	1	Q13322-3;Q13322-2;Q13322-4;Q13322	Q13322-3;Q13322-2;Q13322-4;Q13322	Growth factor receptor-bound protein 10	GRB10	1535
NaN	NaN	NaN	NaN	NaN	NaN	NaN	NaN	NaN	1	1	1	1.7	1.7	1.7	79.192	0.00039888	2.5846	7942000	1	Q13330-3;Q13330	Q13330-3;Q13330	Metastasis-associated protein MTA1	MTA1	1536
NaN	NaN	NaN	22.8409	22.5637	NaN	NaN	22.5512	NaN	6	5	4	4.7	3.7	3.1	212.48	0	20.465	120900000	8	Q13332-6;Q13332-3;Q13332-4;Q13332-2;Q13332;Q13332-7;Q13332-5	Q13332-6;Q13332-3;Q13332-4;Q13332-2;Q13332;Q13332-7;Q13332-5	Receptor-type tyrosine-protein phosphatase S	PTPRS	1537
NaN	NaN	NaN	22.2987	NaN	20.635	20.8101	NaN	NaN	4	4	4	22.2	22.2	22.2	36.501	0	17.892	48149000	6	Q13347	Q13347	Eukaryotic translation initiation factor 3 subunit I	EIF3I	1538
NaN	NaN	NaN	21.4658	NaN	19.9759	NaN	21.1686	NaN	4	4	3	13.1	13.1	10.2	52.625	0	6.0888	33178000	5	Q13362-2;Q13362-3;Q13362;Q13362-4;Q13362-5	Q13362-2;Q13362-3;Q13362;Q13362-4;Q13362-5	Serine/threonine-protein phosphatase 2A 56 kDa regulatory subunit gamma isoform	PPP2R5C	1539
NaN	NaN	NaN	NaN	NaN	22.6811	NaN	NaN	NaN	3	3	3	10.5	10.5	10.5	68.426	0	23.726	87982000	13	Q13409-3;Q13409-7;Q13409-2;Q13409;Q13409-6;Q13409-5	Q13409-3;Q13409-7;Q13409-2;Q13409;Q13409-6;Q13409-5	Cytoplasmic dynein 1 intermediate chain 2	DYNC1I2	1540
NaN	NaN	NaN	NaN	NaN	NaN	21.3011	21.9384	22.0747	3	3	3	8.8	8.8	8.8	51.419	0	9.2823	89537000	6	Q13418;Q13418-3;Q13418-2	Q13418;Q13418-3;Q13418-2	Integrin-linked protein kinase	ILK	1541
24.3353	25.2869	24.7272	25.676	25.5019	25.2256	23.6573	24.9413	24.2796	14	14	14	18.6	18.6	18.6	113.89	0	112.52	1023100000	63	Q13423	Q13423	NAD(P) transhydrogenase, mitochondrial	NNT	1542
NaN	NaN	NaN	NaN	NaN	20.5866	20.6628	NaN	NaN	2	2	2	4.4	4.4	4.4	57.949	0	2.8593	11456000	2	Q13425;Q13425-2	Q13425;Q13425-2	Beta-2-syntrophin	SNTB2	1543
NaN	NaN	NaN	NaN	NaN	NaN	NaN	NaN	NaN	2	2	2	9.8	9.8	9.8	40.299	0.002845	1.8235	48604000	3	Q13427-2;Q13427	Q13427-2;Q13427	Peptidyl-prolyl cis-trans isomerase G	PPIG	1544
24.3376	NaN	NaN	23.4396	NaN	23.3155	22.7264	NaN	22.9911	8	8	1	11.1	11.1	1.9	144.31	0	11.653	265880000	21	Q13428-2;Q13428-8;Q13428;Q13428-3;Q13428-4;Q13428-5	Q13428-2;Q13428-8;Q13428;Q13428-3;Q13428-4;Q13428-5	Treacle protein	TCOF1	1545
NaN	NaN	NaN	NaN	NaN	NaN	NaN	NaN	21.8713	1	1	1	1.3	1.3	1.3	85.046	0.0035088	1.7487	82381000	2	Q13433	Q13433	Zinc transporter ZIP6	SLC39A6	1546
25.8147	20.7197	20.8335	24.2977	21.6501	26.8764	26.3916	22.1285	23.8975	20	20	20	40	40	40	100.23	0	124.59	1423300000	112	Q13435	Q13435	Splicing factor 3B subunit 2	SF3B2	1547
22.5706	23.1885	NaN	22.6834	22.8049	NaN	23.2921	21.9886	22.1308	6	6	6	30.4	30.4	30.4	20.63	0	6.4261	224040000	12	Q13442	Q13442	28 kDa heat- and acid-stable phosphoprotein	PDAP1	1548
25.9312	27.0341	25.9906	26.379	25.3141	22.7544	25.2305	29.0821	27.4782	13	13	13	22.8	22.8	22.8	90.555	0	323.31	5895700000	183	Q13443;Q13443-2	Q13443;Q13443-2	Disintegrin and metalloproteinase domain-containing protein 9	ADAM9	1549
NaN	NaN	NaN	NaN	NaN	NaN	NaN	19.8961	NaN	1	1	1	4	4	4	25.206	0.0014599	1.9725	22539000	2	Q13445	Q13445	Transmembrane emp24 domain-containing protein 1	TMED1	1550
NaN	NaN	NaN	NaN	NaN	NaN	NaN	25.0106	23.0331	6	6	6	29	29	29	37.393	0	39.48	286290000	14	Q13449	Q13449	Limbic system-associated membrane protein	LSAMP	1551
22.4198	24.2793	25.8182	20.8908	20.4807	NaN	NaN	NaN	21.2186	4	4	4	16.6	16.6	16.6	51.212	0	9.9315	133060000	10	Q13451;Q13451-2	Q13451;Q13451-2	Peptidyl-prolyl cis-trans isomerase FKBP5;Peptidyl-prolyl cis-trans isomerase FKBP5, N-terminally processed	FKBP5	1552
NaN	NaN	22.2319	NaN	NaN	NaN	NaN	NaN	NaN	1	1	1	4	4	4	39.558	0.0044843	1.6296	4846300	1	Q13454-2;Q13454	Q13454-2;Q13454	Tumor suppressor candidate 3	TUSC3	1553
NaN	NaN	NaN	NaN	NaN	22.407	NaN	NaN	NaN	2	2	2	7	7	7	66.392	0	8.1065	85035000	1	Q13492-3;Q13492-2;Q13492-5;Q13492;Q13492-4	Q13492-3;Q13492-2;Q13492-5;Q13492;Q13492-4	Phosphatidylinositol-binding clathrin assembly protein	PICALM	1554
24.5757	23.3827	24.2525	22.7924	NaN	22.6725	24.0218	23.3545	23.8578	5	5	5	37.6	37.6	37.6	38.629	0	41.872	551720000	34	Q13501-2;Q13501	Q13501-2;Q13501	Sequestosome-1	SQSTM1	1555
NaN	22.4308	NaN	23.5705	22.5713	22.4266	22.1153	23.7395	NaN	2	2	2	11	11	11	35.777	0	30.38	227740000	12	Q13505-3;Q13505-2;Q13505	Q13505-3;Q13505-2;Q13505	Metaxin-1	MTX1	1556
24.7006	25.2844	25.3734	24.6305	23.8779	23.8179	24.5925	27.5446	27.078	27	9	9	61.1	37.6	37.6	50.432	0	244.28	2866100000	75	Q13509;Q13509-2;Q9H4B7	Q13509;Q13509-2	Tubulin beta-3 chain	TUBB3	1557
22.9016	NaN	NaN	20.8954	NaN	24.6471	23.8557	NaN	21.8916	7	7	7	9.8	9.8	9.8	116.99	0	105.28	277050000	20	Q13523	Q13523	Serine/threonine-protein kinase PRP4 homolog	PRPF4B	1558
NaN	NaN	NaN	NaN	NaN	21.0499	NaN	NaN	NaN	1	1	1	2.8	2.8	2.8	51.998	0	3.2604	11053000	1	Q92769-3;Q13547;Q92769	Q92769-3;Q13547;Q92769	Histone deacetylase 2;Histone deacetylase 1	HDAC2;HDAC1	1559
NaN	NaN	NaN	NaN	NaN	NaN	NaN	NaN	NaN	2	1	1	5.8	3.1	3.1	50.955	0.0014679	2.0004	16304000	1	Q13554-7;Q13555-7;Q13555-6;Q13555;Q13555-8;Q13555-2;Q13555-9;Q13554-2;Q13555-11;Q13555-4;Q13554-4;Q13555-5;Q13555-3;Q13554-5;Q13554-8;Q13554-3;Q13555-10;Q13554-6;Q13554	Q13554-7;Q13555-7;Q13555-6;Q13555;Q13555-8;Q13555-2;Q13555-9;Q13554-2;Q13555-11;Q13555-4;Q13554-4;Q13555-5;Q13555-3;Q13554-5;Q13554-8;Q13554-3;Q13555-10;Q13554-6;Q13554	Calcium/calmodulin-dependent protein kinase type II subunit beta;Calcium/calmodulin-dependent protein kinase type II subunit gamma	CAMK2B;CAMK2G	1560
22.5155	NaN	NaN	NaN	NaN	22.5267	22.9867	24.0071	23.0839	3	3	2	10	10	7.5	54.127	0	10.345	278150000	14	Q13557-8;Q13557-12;Q13557-9;Q13557-10;Q13557-5;Q13557;Q13557-3;Q13557-6;Q13557-4;Q13557-11;Q9UQM7;Q9UQM7-2	Q13557-8;Q13557-12;Q13557-9;Q13557-10;Q13557-5;Q13557;Q13557-3;Q13557-6;Q13557-4;Q13557-11	Calcium/calmodulin-dependent protein kinase type II subunit delta	CAMK2D	1561
NaN	NaN	NaN	NaN	NaN	20.5035	NaN	NaN	NaN	4	4	4	14	14	14	44.23	0	4.8823	38478000	5	Q13561;Q13561-3;Q13561-2	Q13561;Q13561-3;Q13561-2	Dynactin subunit 2	DCTN2	1562
21.9569	NaN	NaN	NaN	NaN	23.2057	22.7206	NaN	NaN	9	9	9	25	25	25	61.494	0	18.596	121430000	16	Q13573	Q13573	SNW domain-containing protein 1	SNW1	1563
NaN	NaN	NaN	21.0823	NaN	NaN	20.8304	NaN	20.9868	3	3	3	8.5	8.5	8.5	77.422	0.00039761	2.5634	36245000	3	Q13586;Q13586-2	Q13586;Q13586-2	Stromal interaction molecule 1	STIM1	1564
21.3032	NaN	NaN	NaN	NaN	21.9299	NaN	NaN	NaN	2	2	2	15	15	15	12.951	0	9.2884	32943000	5	Q13595-2;Q13595-4;Q13595-3;Q13595	Q13595-2;Q13595-4;Q13595-3;Q13595	Transformer-2 protein homolog alpha	TRA2A	1565
NaN	NaN	NaN	21.0225	NaN	NaN	NaN	NaN	21.4513	2	2	2	8.3	8.3	8.3	51.812	0	3.2048	52209000	3	Q13596-2;Q13596;Q13596-3	Q13596-2;Q13596;Q13596-3	Sorting nexin-1	SNX1	1566
21.418	NaN	NaN	20.2437	NaN	21.271	21.4206	NaN	20.2523	5	5	5	15	15	15	43.664	0	8.2805	74200000	10	Q13601;Q13601-2	Q13601;Q13601-2	KRR1 small subunit processome component homolog	KRR1	1567
NaN	21.292	NaN	22.1617	NaN	NaN	NaN	21.8958	21.3079	5	5	5	7.5	7.5	7.5	81.092	0	5.3603	82639000	7	Q13618-3;Q13618-2;Q13618	Q13618-3;Q13618-2;Q13618	Cullin-3	CUL3	1568
NaN	NaN	NaN	NaN	NaN	NaN	NaN	NaN	20.0717	1	1	1	2.1	2.1	2.1	87.679	0.00039698	2.5487	8886500	1	Q13619	Q13619	Cullin-4A	CUL4A	1569
NaN	NaN	NaN	NaN	NaN	NaN	NaN	NaN	NaN	1	1	1	12.5	12.5	12.5	35.892	0.0014615	1.978	256520000	16	Q13630	Q13630	GDP-L-fucose synthase	TSTA3	1570
NaN	NaN	NaN	NaN	NaN	NaN	NaN	22.6411	NaN	2	2	2	18	18	18	21.569	0	55.803	50309000	4	Q13636	Q13636	Ras-related protein Rab-31	RAB31	1571
NaN	NaN	NaN	NaN	NaN	21.4865	NaN	NaN	21.0686	2	2	2	20.9	20.9	20.9	24.997	0	6.4648	65011000	3	Q13637	Q13637	Ras-related protein Rab-32	RAB32	1572
23.802	23.3934	23.5505	26.4275	24.6726	23.7181	25.7914	27.5358	26.5726	10	10	10	23.8	23.8	23.8	46.031	0	323.31	2544400000	96	Q13641	Q13641	Trophoblast glycoprotein	TPBG	1573
NaN	NaN	NaN	21.7901	22.0793	22.1224	NaN	NaN	NaN	1	1	1	7.9	7.9	7.9	31.192	0.0011161	2.0604	61136000	3	Q13643	Q13643	Four and a half LIM domains protein 3	FHL3	1574
NaN	NaN	NaN	NaN	NaN	NaN	22.0909	23.0017	22.2797	4	4	4	15.5	15.5	15.5	77.499	0	39.63	105440000	5	Q13671-2;Q13671	Q13671-2;Q13671	Ras and Rab interactor 1	RIN1	1575
24.787	25.7975	24.5491	NaN	NaN	23.2966	22.9441	26.3112	24.0926	11	11	11	15.1	15.1	15.1	114.54	0	105.44	878630000	29	Q13683-13;Q13683-3;Q13683-9;Q13683-7;Q13683;Q13683-10	Q13683-13;Q13683-3;Q13683-9;Q13683-7;Q13683;Q13683-10	Integrin alpha-7;Integrin alpha-7 heavy chain;Integrin alpha-7 light chain;Integrin alpha-7 70 kDa form	ITGA7	1576
25.0613	27.0254	26.6804	25.1689	27.166	26.3347	25.2662	26.1285	25.3125	28	28	28	50.7	50.7	50.7	91.916	0	294.51	2712600000	204	Q13724;Q13724-2	Q13724;Q13724-2	Mannosyl-oligosaccharide glucosidase	MOGS	1577
27.1682	28.4118	29.3545	28.5127	26.9064	22.853	25.6026	28.6631	27.1383	18	18	18	38.2	38.2	38.2	63.664	0	323.31	6720100000	208	Q13740-2;Q13740;Q13740-4;Q13740-3	Q13740-2;Q13740	CD166 antigen	ALCAM	1578
NaN	NaN	NaN	NaN	NaN	22.9444	21.6803	NaN	NaN	2	2	2	6.7	6.7	6.7	78.507	0	9.8512	59620000	2	Q13769	Q13769	THO complex subunit 5 homolog	THOC5	1579
NaN	NaN	NaN	NaN	NaN	NaN	NaN	NaN	NaN	1	1	1	2.8	2.8	2.8	69.725	0.0096925	1.4176	17871000	1	Q13772;Q13772-3;Q13772-4	Q13772;Q13772-3;Q13772-4	Nuclear receptor coactivator 4	NCOA4	1580
22.4959	22.101	NaN	21.9907	NaN	22.5808	22.1463	21.599	NaN	4	4	4	1.7	1.7	1.7	282.28	0	8.2158	130870000	16	Q13813-3;Q13813;Q13813-2	Q13813-3;Q13813;Q13813-2	Spectrin alpha chain, non-erythrocytic 1	SPTAN1	1581
21.8107	NaN	NaN	21.4685	NaN	24.1361	22.8479	NaN	20.9765	7	7	7	12.4	12.4	12.4	83.654	0	9.6313	185590000	17	Q13823	Q13823	Nucleolar GTP-binding protein 2	GNL2	1582
NaN	NaN	NaN	NaN	NaN	NaN	NaN	NaN	NaN	5	5	5	12.1	12.1	12.1	80.496	0	15.534	47473000	8	Q13835-2;Q13835	Q13835-2;Q13835	Plakophilin-1	PKP1	1583
23.481	22.8644	NaN	23.7737	22.5223	24.2585	24.0348	23.1815	24.7691	7	7	2	27.8	27.8	14	48.991	0	62.621	470440000	24	Q13838;Q13838-2	Q13838;Q13838-2	Spliceosome RNA helicase DDX39B	DDX39B	1584
NaN	NaN	NaN	NaN	NaN	21.9591	21.7521	NaN	NaN	2	2	2	9.9	9.9	9.9	29.408	0	4.2461	54785000	4	Q13868-3;Q13868;Q13868-2	Q13868-3;Q13868;Q13868-2	Exosome complex component RRP4	EXOSC2	1585
NaN	NaN	NaN	NaN	NaN	NaN	NaN	21.5122	NaN	4	4	4	9.8	9.8	9.8	59.963	0	4.3499	39588000	5	Q13873-2;Q13873	Q13873-2;Q13873	Bone morphogenetic protein receptor type-2	BMPR2	1586
NaN	23.6621	23.215	NaN	24.2074	NaN	NaN	24.8189	23.7381	36	1	1	64.3	3.6	3.6	49.906	0	26.023	416200000	19	Q13885	Q13885	Tubulin beta-2A chain	TUBB2A	1587
22.5213	NaN	NaN	21.6995	NaN	NaN	22.5173	NaN	19.6992	2	2	2	5	5	5	49.601	0.00076953	2.3006	59989000	10	Q13895	Q13895	Bystin	BYSL	1588
NaN	NaN	NaN	NaN	NaN	22.2509	NaN	NaN	NaN	1	1	1	10.7	10.7	10.7	21.991	0	10.715	32987000	2	Q13951-2	Q13951-2			1589
NaN	NaN	NaN	NaN	NaN	NaN	NaN	NaN	NaN	1	1	1	1.7	1.7	1.7	218.52	0	11.129	40643000	2	Q14008-2;Q14008;Q14008-3	Q14008-2;Q14008;Q14008-3	Cytoskeleton-associated protein 5	CKAP5	1590
21.6133	21.7116	NaN	NaN	22.8841	23.0138	20.6751	NaN	NaN	2	2	2	20.3	20.3	20.3	18.648	0	3.3266	111470000	12	Q14011;Q14011-2	Q14011;Q14011-2	Cold-inducible RNA-binding protein	CIRBP	1591
NaN	NaN	NaN	NaN	NaN	NaN	NaN	NaN	19.6688	2	2	2	63.5	63.5	63.5	6.9151	0	19.172	34627000	2	Q14061	Q14061	Cytochrome c oxidase copper chaperone	COX17	1592
NaN	NaN	NaN	NaN	NaN	21.583	22.2174	21.5933	22.1182	4	3	3	19.5	16	16	30.672	0	29.654	136570000	8	Q14103-4;Q14103-3;Q14103-2;Q14103	Q14103-4;Q14103-3;Q14103-2;Q14103	Heterogeneous nuclear ribonucleoprotein D0	HNRNPD	1593
NaN	NaN	NaN	NaN	NaN	22.4657	NaN	NaN	NaN	1	1	1	4	4	4	54.29	0.0014593	1.9683	77797000	7	Q14108	Q14108	Lysosome membrane protein 2	SCARB2	1594
23.5126	22.6565	NaN	NaN	NaN	23.075	NaN	NaN	NaN	7	7	7	9.4	9.4	9.4	140.86	0	46.931	155970000	12	Q14112-2;Q14112	Q14112-2;Q14112	Nidogen-2	NID2	1595
NaN	20.4092	NaN	22.1473	20.3656	NaN	20.6905	25.3016	23.3259	9	8	8	11.2	11.2	11.2	87.959	0	18.247	357930000	15	Q14114-4;Q14114;Q14114-2;Q14114-3	Q14114-4;Q14114;Q14114-2;Q14114-3	Low-density lipoprotein receptor-related protein 8	LRP8	1596
24.2974	23.8287	24.091	23.9136	23.5497	21.5223	22.6646	25.4373	23.8895	6	6	6	6	6	6	97.44	0	27.312	527220000	36	Q14118	Q14118	Dystroglycan;Alpha-dystroglycan;Beta-dystroglycan	DAG1	1597
26.431	24.3938	25.38	20.8688	21.0747	20.8464	23.3255	26.7367	27.0334	21	21	21	34.5	34.5	34.5	122.29	0	323.31	1388000000	85	Q14126	Q14126	Desmoglein-2	DSG2	1598
24.9071	NaN	NaN	24.1219	NaN	25.6969	25.0339	21.7062	22.968	12	12	12	41	41	41	71.929	0	156.94	645530000	46	Q14137-2;Q14137	Q14137-2;Q14137	Ribosome biogenesis protein BOP1	BOP1	1599
NaN	NaN	NaN	NaN	NaN	NaN	NaN	NaN	19.3247	1	1	1	1.1	1.1	1.1	122.56	0	2.6944	10693000	2	Q14139;Q14139-2	Q14139;Q14139-2	Ubiquitin conjugation factor E4 A	UBE4A	1600
NaN	NaN	NaN	NaN	NaN	23.9003	22.6209	NaN	NaN	10	7	7	17.1	12.3	12.3	107.47	0	18.573	162280000	13	Q14151;Q14151-2	Q14151	Scaffold attachment factor B2	SAFB2	1601
23.0112	21.6875	21.6401	23.357	NaN	22.1138	23.1747	21.0831	22.6098	4	4	4	4.6	4.6	4.6	166.57	0	19.539	191820000	20	Q14152;Q14152-2	Q14152;Q14152-2	Eukaryotic translation initiation factor 3 subunit A	EIF3A	1602
NaN	23.0156	NaN	22.1589	22.0491	NaN	NaN	NaN	NaN	4	4	4	6.8	6.8	6.8	103.17	0	5.7589	106400000	7	Q14157-4;Q14157-1;Q14157-3;Q14157;Q14157-5	Q14157-4;Q14157-1;Q14157-3;Q14157;Q14157-5	Ubiquitin-associated protein 2-like	UBAP2L	1603
21.6308	22.521	22.5434	23.3465	21.5855	21.8711	22.8806	23.007	22.7189	2	2	2	8.6	8.6	8.6	32.233	0	118.2	205870000	23	Q14165	Q14165	Malectin	MLEC	1604
NaN	NaN	NaN	NaN	NaN	NaN	NaN	NaN	18.3288	1	1	1	4.8	4.8	4.8	46.518	0	5.3041	2089200	1	Q14168-5;Q14168-6;Q14168-2;Q14168-3;Q14168;Q14168-4	Q14168-5;Q14168-6;Q14168-2;Q14168-3;Q14168;Q14168-4	MAGUK p55 subfamily member 2	MPP2	1605
24.8099	24.4471	22.7752	26.5125	25.4306	26.1647	23.8528	24.2716	24.0263	26	26	25	55.6	55.6	55.6	73.91	0	238.49	1314900000	89	Q14195-2;Q14195;Q14194;Q14194-2;Q14117	Q14195-2;Q14195	Dihydropyrimidinase-related protein 3	DPYSL3	1606
NaN	NaN	NaN	23.1613	NaN	21.5507	NaN	21.6263	22.2292	3	3	3	3.5	3.5	3.5	126.73	0	38.368	129940000	4	Q14203-5;Q14203-2;Q14203-3;Q14203-4;Q14203-6;Q14203	Q14203-5;Q14203-2;Q14203-3;Q14203-4;Q14203-6;Q14203	Dynactin subunit 1	DCTN1	1607
24.3208	25.1298	24.8497	24.2843	25.2529	25.2917	25.3962	25.7872	25.8089	39	39	39	12	12	12	532.4	0	229.77	1617100000	122	Q14204	Q14204	Cytoplasmic dynein 1 heavy chain 1	DYNC1H1	1608
NaN	NaN	NaN	NaN	NaN	NaN	NaN	NaN	21.5823	1	1	1	5.6	5.6	5.6	33.712	0.0014535	1.9498	21823000	2	Q14232	Q14232	Translation initiation factor eIF-2B subunit alpha	EIF2B1	1609
25.0051	23.8058	23.2767	23.029	NaN	23.1766	25.9877	25.2074	25.3415	6	6	6	27.3	27.3	27.3	57.466	0	138.12	878500000	39	Q14247-3;Q14247;Q14247-2	Q14247-3;Q14247;Q14247-2	Src substrate cortactin	CTTN	1610
NaN	NaN	NaN	NaN	NaN	NaN	NaN	NaN	19.7303	1	1	1	4.4	4.4	4.4	32.62	0.0068329	1.561	8969000	3	Q14249	Q14249	Endonuclease G, mitochondrial	ENDOG	1611
22.7527	22.2769	21.4002	22.2646	NaN	23.3017	23.718	23.1494	24.7969	13	11	11	6.5	6	6	287.28	0	70.445	457100000	23	Q14315-2;Q14315	Q14315-2;Q14315	Filamin-C	FLNC	1612
22.0497	22.3999	22.298	22.9335	22.3462	21.6581	NaN	22.9262	23.4118	4	4	4	12.6	12.6	12.6	44.648	0	69.022	236330000	14	Q14318-2;Q14318;Q14318-3	Q14318-2;Q14318;Q14318-3	Peptidyl-prolyl cis-trans isomerase FKBP8	FKBP8	1613
NaN	NaN	NaN	NaN	NaN	NaN	NaN	NaN	NaN	1	1	1	5	5	5	29.172	0	3.4371	0	1	Q14331	Q14331	Protein FRG1	FRG1	1614
21.5544	22.4289	21.8245	22.2311	21.7508	NaN	NaN	NaN	NaN	2	2	2	4.4	4.4	4.4	63.553	0	3.3795	45254000	6	Q14332	Q14332	Frizzled-2	FZD2	1615
22.2286	23.1703	23.5754	25.2206	23.8048	24.0167	22.1222	24.6853	24.1736	11	11	11	38.5	38.5	38.5	44.049	0	50.083	618250000	31	Q14344;Q14344-2;Q03113	Q14344;Q14344-2	Guanine nucleotide-binding protein subunit alpha-13	GNA13	1616
NaN	NaN	NaN	NaN	NaN	NaN	NaN	21.1747	NaN	1	1	1	3	3	3	71.978	0	16.12	14954000	1	Q14392	Q14392	Leucine-rich repeat-containing protein 32	LRRC32	1617
NaN	NaN	NaN	21.5332	NaN	NaN	22.5064	NaN	NaN	2	2	2	5.5	5.5	5.5	76.861	0	11.027	95572000	12	Q14444-2;Q14444	Q14444-2;Q14444	Caprin-1	CAPRIN1	1618
23.707	23.3454	23.9939	22.3643	24.1455	24.2968	24.3352	24.1332	24.4162	10	10	10	27.3	27.3	27.3	58.656	0	45.745	787860000	39	Q14498-2;Q14498;Q14498-3;Q86U06-3;Q86U06-4;Q86U06-5;Q86U06-2;Q86U06	Q14498-2;Q14498;Q14498-3	RNA-binding protein 39	RBM39	1619
NaN	NaN	NaN	NaN	NaN	NaN	NaN	NaN	21.0192	2	2	2	2.6	2.6	2.6	99.918	0	2.7399	32979000	5	Q14527-2;Q14527	Q14527-2;Q14527	Helicase-like transcription factor	HLTF	1620
NaN	NaN	NaN	NaN	NaN	20.7687	NaN	NaN	NaN	1	1	1	3.7	3.7	3.7	59.594	0.00077973	2.4186	16217000	2	Q14554	Q14554	Protein disulfide-isomerase A5	PDIA5	1621
NaN	NaN	NaN	NaN	NaN	NaN	NaN	20.0979	NaN	2	2	2	9.3	9.3	9.3	39.393	0.0084289	1.4819	7089600	2	Q14558;Q14558-2	Q14558;Q14558-2	Phosphoribosyl pyrophosphate synthase-associated protein 1	PRPSAP1	1622
NaN	NaN	NaN	NaN	NaN	21.0009	NaN	NaN	NaN	3	2	2	2.9	2.1	2.1	139.31	0	3.3567	20653000	2	Q14562	Q14562	ATP-dependent RNA helicase DHX8	DHX8	1623
NaN	NaN	21.1625	NaN	NaN	NaN	NaN	20.969	22.755	2	2	2	3.8	3.8	3.8	92.888	0	52.077	65343000	2	Q14566	Q14566	DNA replication licensing factor MCM6	MCM6	1624
23.6734	22.7796	NaN	NaN	22.2053	22.2065	22.4377	23.2648	21.903	8	8	8	5.1	5.1	5.1	304.1	0	14.238	206290000	8	Q14573	Q14573	Inositol 1,4,5-trisphosphate receptor type 3	ITPR3	1625
NaN	NaN	NaN	NaN	NaN	NaN	NaN	NaN	22.2936	1	1	1	5.1	5.1	5.1	45.25	0.0011236	2.0978	32622000	2	Q14623;Q15465	Q14623;Q15465	Indian hedgehog protein;Indian hedgehog protein N-product;Indian hedgehog protein C-product;Sonic hedgehog protein;Sonic hedgehog protein N-product;Sonic hedgehog protein C-product	IHH;SHH	1626
NaN	NaN	NaN	NaN	NaN	NaN	23.6882	23.6078	23.6844	7	7	7	5.5	5.5	5.5	306.77	0	20.828	217960000	10	Q14643-4;Q14643-3;Q14643-8;Q14643-7;Q14643-5;Q14643-6;Q14643-2;Q14643	Q14643-4;Q14643-3;Q14643-8;Q14643-7;Q14643-5;Q14643-6;Q14643-2;Q14643	Inositol 1,4,5-trisphosphate receptor type 1	ITPR1	1627
NaN	NaN	NaN	NaN	NaN	NaN	NaN	20.7844	NaN	2	2	2	3.6	3.6	3.6	95.698	0.0011232	2.0974	19953000	1	Q14644;Q14644-2	Q14644;Q14644-2	Ras GTPase-activating protein 3	RASA3	1628
NaN	NaN	NaN	20.2495	NaN	20.119	20.3667	20.8971	20.2351	4	4	4	3.5	3.5	3.5	192.07	0	9.2229	40273000	5	Q14669-4;Q14669;Q14669-2;Q14669-3	Q14669-4;Q14669;Q14669-2;Q14669-3	E3 ubiquitin-protein ligase TRIP12	TRIP12	1629
21.8756	NaN	NaN	22.9302	NaN	21.4157	NaN	21.7321	21.7341	4	4	4	5.9	5.9	5.9	124.42	0	8.9534	96640000	6	Q14671-2;Q14671;Q14671-3;Q14671-4	Q14671-2;Q14671;Q14671-3;Q14671-4	Pumilio homolog 1	PUM1	1630
NaN	NaN	NaN	NaN	NaN	NaN	20.885	NaN	NaN	1	1	1	2	2	2	197.6	0.00076482	2.2484	7694500	1	Q14676-2;Q14676	Q14676-2;Q14676	Mediator of DNA damage checkpoint protein 1	MDC1	1631
NaN	21.8972	NaN	22.2704	NaN	23.052	NaN	21.9847	22.4298	4	4	4	14.9	14.9	14.9	70.294	0	8.1342	211330000	7	Q14677-3;Q14677-2;Q14677	Q14677-3;Q14677-2;Q14677	Clathrin interactor 1	CLINT1	1632
NaN	NaN	NaN	NaN	NaN	19.4594	NaN	NaN	NaN	1	1	1	1.6	1.6	1.6	129.78	0	3.7894	3670100	1	Q14678-2;Q14678	Q14678-2;Q14678	KN motif and ankyrin repeat domain-containing protein 1	KANK1	1633
NaN	NaN	NaN	NaN	NaN	NaN	NaN	NaN	NaN	1	1	1	2.5	2.5	2.5	143.23	0	2.6503	12378000	2	Q14683	Q14683	Structural maintenance of chromosomes protein 1A	SMC1A	1634
25.5548	19.997	NaN	21.6568	NaN	22.6677	24.6376	20.3923	22.2158	8	8	8	18.9	18.9	18.9	82.175	0	30.512	327650000	40	Q14684-2;Q14684	Q14684-2;Q14684	Ribosomal RNA processing protein 1 homolog B	RRP1B	1635
25.6859	NaN	NaN	24.33	NaN	26.9981	26.1121	21.9491	24.1386	30	30	30	26.6	26.6	26.6	208.7	0	150.16	1657600000	100	Q14690	Q14690	Protein RRP5 homolog	PDCD11	1636
23.4782	NaN	NaN	22.6102	NaN	24.5814	23.9901	NaN	23.4345	16	16	16	19.9	19.9	19.9	145.81	0	28.541	265650000	25	Q14692	Q14692	Ribosome biogenesis protein BMS1 homolog	BMS1	1637
NaN	NaN	NaN	21.4462	NaN	NaN	NaN	NaN	21.4291	3	3	3	8.6	8.6	8.6	87.133	0	10.637	59795000	7	Q14694;Q14694-3;Q14694-2	Q14694;Q14694-3;Q14694-2	Ubiquitin carboxyl-terminal hydrolase 10	USP10	1638
NaN	NaN	NaN	NaN	NaN	NaN	NaN	NaN	19.7272	1	1	1	8.7	8.7	8.7	14.895	0	8.1847	7827700	1	Q14696-2;Q14696	Q14696-2;Q14696	LDLR chaperone MESD	MESDC2	1639
24.7174	24.3823	23.266	25.3609	24.6785	26.1162	23.8736	24.4226	25.7877	15	15	15	23.1	23.1	23.1	106.87	0	87.929	1347700000	67	Q14697;Q14697-2	Q14697;Q14697-2	Neutral alpha-glucosidase AB	GANAB	1640
NaN	NaN	NaN	22.0599	21.9893	21.3471	NaN	NaN	NaN	2	2	2	10.7	10.7	10.7	63.145	0.00078709	2.4924	47119000	3	Q14699	Q14699	Raftlin	RFTN1	1641
NaN	NaN	NaN	NaN	NaN	NaN	NaN	20.5728	NaN	1	1	1	2.4	2.4	2.4	70.702	0.002848	1.8259	36166000	3	Q14739	Q14739	Lamin-B receptor	LBR	1642
25.4375	25.4445	24.3503	23.2271	23.902	31.1679	25.7482	24.9317	25.4406	81	81	81	78.5	78.5	78.5	99.326	0	323.31	17111000000	499	Q14764	Q14764	Major vault protein	MVP	1643
NaN	NaN	NaN	NaN	NaN	NaN	NaN	NaN	NaN	1	1	1	0.7	0.7	0.7	195.05	0.0051529	1.5969	8778300	1	Q14767	Q14767	Latent-transforming growth factor beta-binding protein 2	LTBP2	1644
NaN	NaN	NaN	NaN	NaN	24.0506	NaN	NaN	NaN	4	4	4	2.5	2.5	2.5	367.42	0	4.8683	751670000	6	Q14789-4;Q14789-3;Q14789;Q14789-2	Q14789-4;Q14789-3;Q14789;Q14789-2	Golgin subfamily B member 1	GOLGB1	1645
23.1741	NaN	NaN	NaN	NaN	21.7456	NaN	NaN	21.7364	5	5	5	4.9	4.9	4.9	218	0	5.3499	65636000	5	Q14839;Q14839-2;Q8TDI0	Q14839;Q14839-2	Chromodomain-helicase-DNA-binding protein 4	CHD4	1646
24.3129	23.5933	22.7111	23.4636	22.2347	22.065	23.8696	NaN	22.9825	4	4	4	14.6	14.6	14.6	36.014	0	10.569	204060000	18	Q14847-2;Q14847;Q14847-3	Q14847-2;Q14847;Q14847-3	LIM and SH3 domain protein 1	LASP1	1647
NaN	NaN	NaN	NaN	NaN	21.946	NaN	NaN	NaN	1	1	1	6.2	6.2	6.2	47.91	0.0028653	1.8519	32523000	2	Q14938-6;Q14938-5;Q14938-3;Q14938-2;Q14938-4;Q14938	Q14938-6;Q14938-5;Q14938-3;Q14938-2;Q14938-4;Q14938	Nuclear factor 1 X-type	NFIX	1648
NaN	NaN	NaN	NaN	NaN	NaN	NaN	18.6726	NaN	1	1	1	2.7	2.7	2.7	62.642	0.0041566	1.6551	7850000	1	Q14956-2;Q14956	Q14956-2;Q14956	Transmembrane glycoprotein NMB	GPNMB	1649
21.7293	NaN	NaN	NaN	NaN	21.4117	21.6119	NaN	NaN	2	2	2	1.8	1.8	1.8	218.24	0	2.8344	30221000	3	Q14966-3;Q14966;Q14966-2;Q14966-6;Q14966-5;Q14966-4	Q14966-3;Q14966;Q14966-2;Q14966-6;Q14966-5;Q14966-4	Zinc finger protein 638	ZNF638	1650
24.1101	23.5315	23.7512	25.0275	23.7486	23.7182	23.1839	24.1242	24.5519	11	11	11	12.7	12.7	12.7	97.169	0	269.58	653830000	45	Q14974;Q14974-2	Q14974	Importin subunit beta-1	KPNB1	1651
23.2068	NaN	NaN	21.7495	NaN	NaN	22.1976	NaN	22.0655	5	5	1	9.6	9.6	3.3	73.602	0	8.1646	93615000	13	Q14978;Q14978-2	Q14978;Q14978-2	Nucleolar and coiled-body phosphoprotein 1	NOLC1	1652
NaN	NaN	NaN	NaN	NaN	NaN	20.9668	NaN	NaN	5	1	1	9.7	3.4	3.4	73.744	0.00076132	2.1956	23991000	5	Q14978-3	Q14978-3	Nucleolar and coiled-body phosphoprotein 1	NOLC1	1653
24.1475	NaN	NaN	NaN	NaN	23.2947	23.83	NaN	NaN	9	9	9	8.5	8.5	8.5	236.51	0	15.94	165950000	22	Q14980-2;Q14980;Q14980-5;Q14980-4;Q14980-3	Q14980-2;Q14980;Q14980-5	Nuclear mitotic apparatus protein 1	NUMA1	1654
NaN	NaN	NaN	20.735	NaN	NaN	NaN	NaN	NaN	1	1	1	1.3	1.3	1.3	211.33	0	5.3139	9044700	1	Q14997	Q14997	Proteasome activator complex subunit 4	PSME4	1655
NaN	NaN	NaN	NaN	NaN	NaN	NaN	18.856	NaN	1	1	1	2.8	2.8	2.8	49.177	0.0007654	2.2521	9834900	1	Q14BN4-7;Q14BN4-6;Q14BN4-2;Q14BN4-3;Q14BN4	Q14BN4-7;Q14BN4-6;Q14BN4-2;Q14BN4-3;Q14BN4	Sarcolemmal membrane-associated protein	SLMAP	1656
NaN	NaN	NaN	NaN	NaN	NaN	NaN	NaN	20.9684	2	2	2	3.1	3.1	3.1	99.268	0	5.1088	19062000	1	Q14CX7-2;Q14CX7	Q14CX7-2;Q14CX7	N-alpha-acetyltransferase 25, NatB auxiliary subunit	NAA25	1657
NaN	NaN	NaN	NaN	NaN	20.6937	NaN	NaN	NaN	4	4	4	7.7	7.7	7.7	82.562	0	2.9108	17920000	3	Q15003;Q15003-2	Q15003;Q15003-2	Condensin complex subunit 2	NCAPH	1658
NaN	NaN	NaN	NaN	NaN	NaN	NaN	NaN	NaN	1	1	1	20.7	20.7	20.7	11.986	0	3.8079	33189000	2	Q15004	Q15004	PCNA-associated factor	KIAA0101	1659
21.9401	NaN	NaN	24.4165	NaN	22.4428	NaN	23.686	22.9129	4	4	4	14.2	14.2	14.2	25.003	0	38.474	324020000	8	Q15005	Q15005	Signal peptidase complex subunit 2	SPCS2	1660
NaN	NaN	NaN	NaN	NaN	NaN	NaN	21.7948	22.4538	2	2	2	5.7	5.7	5.7	34.833	0	5.6279	89952000	2	Q15006	Q15006	ER membrane protein complex subunit 2	EMC2	1661
NaN	NaN	NaN	NaN	NaN	NaN	21.355	NaN	NaN	1	1	1	4.4	4.4	4.4	45.531	0	8.1752	51762000	5	Q15008;Q15008-4	Q15008;Q15008-4	26S proteasome non-ATPase regulatory subunit 6	PSMD6	1662
NaN	NaN	NaN	NaN	NaN	NaN	NaN	NaN	19.2075	1	1	1	12.1	12.1	12.1	26.22	0.00078678	2.481	7805300	2	Q15011-3;Q15011-4;Q15011-2;Q15011	Q15011-3;Q15011-4;Q15011-2;Q15011	Homocysteine-responsive endoplasmic reticulum-resident ubiquitin-like domain member 1 protein	HERPUD1	1663
NaN	NaN	22.3253	NaN	NaN	NaN	NaN	NaN	NaN	2	2	2	9	9	9	26.8	0.0011223	2.0857	39133000	2	Q15012	Q15012	Lysosomal-associated transmembrane protein 4A	LAPTM4A	1664
25.0464	25.281	25.0364	25.9858	23.6364	24.5201	24.2947	24.1252	25.7106	17	17	17	50.1	50.1	50.1	41.487	0	166.59	1279800000	52	Q15019;Q15019-3;Q15019-2	Q15019;Q15019-3;Q15019-2	Septin-2	2002-09-01	1665
NaN	NaN	NaN	NaN	NaN	NaN	NaN	NaN	NaN	1	1	1	2.6	2.6	2.6	105.58	0.0031679	1.7712	5132000	1	Q15020-4;Q15020	Q15020-4;Q15020	Squamous cell carcinoma antigen recognized by T-cells 3	SART3	1666
NaN	NaN	NaN	22.6289	NaN	NaN	NaN	NaN	NaN	2	2	2	2.1	2.1	2.1	157.18	0	69.824	64527000	5	Q15021	Q15021	Condensin complex subunit 1	NCAPD2	1667
NaN	NaN	NaN	NaN	NaN	18.4734	NaN	NaN	NaN	1	1	1	5.8	5.8	5.8	31.821	0.0028705	1.8644	1853000	1	Q15024	Q15024	Exosome complex component RRP42	EXOSC7	1668
25.4653	21.8466	21.8442	23.1064	21.46	27.1983	25.3458	22.2692	23.6797	25	25	25	34.6	34.6	34.6	105.38	0	122.9	1031100000	92	Q15029-2;Q15029-3;Q15029	Q15029-2;Q15029-3;Q15029	116 kDa U5 small nuclear ribonucleoprotein component	EFTUD2	1669
NaN	NaN	NaN	NaN	NaN	NaN	NaN	NaN	NaN	1	1	1	9.3	9.3	9.3	17.158	0.00076307	2.2173	19624000	2	Q15041-3;Q15041-2;Q15041	Q15041-3;Q15041-2;Q15041	ADP-ribosylation factor-like protein 6-interacting protein 1	ARL6IP1	1670
23.5188	23.635	24.67	26.5455	24.3113	21.5783	24.3464	25.8127	24.6315	3	3	3	9.4	9.4	9.4	52.838	0	323.31	1216900000	71	Q15043-2;Q15043-3;Q15043	Q15043-2;Q15043-3;Q15043	Zinc transporter ZIP14	SLC39A14	1671
NaN	NaN	NaN	NaN	NaN	NaN	NaN	NaN	NaN	1	1	1	2.7	2.7	2.7	68.047	0	82.837	21461000	3	Q15046	Q15046	Lysine--tRNA ligase	KARS	1672
25.298	NaN	NaN	24.3441	NaN	27.3891	26.4228	22.7925	23.1252	15	15	15	47.7	47.7	47.7	41.193	0	289.74	1531600000	59	Q15050	Q15050	Ribosome biogenesis regulatory protein homolog	RRS1	1673
NaN	NaN	NaN	NaN	NaN	NaN	24.0053	NaN	NaN	2	2	2	18	18	18	25.2	0	3.117	80260000	5	Q15056-2;Q15056	Q15056-2;Q15056	Eukaryotic translation initiation factor 4H	EIF4H	1674
23.0582	NaN	NaN	23.2902	NaN	25.5867	24.754	NaN	23.1752	6	6	6	14.5	14.5	14.5	74.89	0	73.098	494740000	22	Q15061	Q15061	WD repeat-containing protein 43	WDR43	1675
NaN	NaN	NaN	20.2547	NaN	21.8559	NaN	NaN	NaN	3	3	3	10	10	10	74.667	0	9.4838	41356000	2	Q15067-2;Q15067-3;Q15067	Q15067-2;Q15067-3;Q15067	Peroxisomal acyl-coenzyme A oxidase 1	ACOX1	1676
21.6098	NaN	NaN	21.1653	NaN	23.6636	NaN	NaN	21.9013	8	8	8	30	30	30	47.837	0	22.271	116090000	14	Q15084-3;Q15084;Q15084-4;Q15084-5;Q15084-2	Q15084-3;Q15084;Q15084-4;Q15084-5;Q15084-2	Protein disulfide-isomerase A6	PDIA6	1677
NaN	NaN	NaN	NaN	NaN	NaN	NaN	NaN	NaN	1	1	1	0.9	0.9	0.9	109.22	0.00075301	2.1383	51368000	3	Q9UPR0-2;Q15111-2;Q9UPR0-3;Q15111;Q9UPR0	Q9UPR0-2;Q15111-2;Q9UPR0-3;Q15111;Q9UPR0	Inactive phospholipase C-like protein 2;Inactive phospholipase C-like protein 1	PLCL2;PLCL1	1678
NaN	NaN	NaN	NaN	NaN	NaN	NaN	NaN	NaN	1	1	1	5.7	5.7	5.7	46.938	0.0014609	1.9765	13531000	2	Q15120;Q15120-2	Q15120;Q15120-2	[Pyruvate dehydrogenase (acetyl-transferring)] kinase isozyme 3, mitochondrial	PDK3	1679
NaN	NaN	NaN	23.9056	NaN	NaN	NaN	24.5871	23.9472	1	1	1	7	7	7	26.352	0	49.808	451500000	14	Q15125	Q15125	3-beta-hydroxysteroid-Delta(8),Delta(7)-isomerase	EBP	1680
30.078	26.0121	22.8866	28.0434	19.9686	30.6139	30.37	29.1032	28.5235	218	218	5	54.7	54.7	1.1	531.78	0	323.31	27984000000	1468	Q15149;Q15149-7;Q15149-8;Q15149-9;Q15149-5;Q15149-6;Q15149-2;Q15149-3;P58107	Q15149;Q15149-7;Q15149-8;Q15149-9;Q15149-5;Q15149-6;Q15149-2;Q15149-3	Plectin	PLEC	1681
24.0331	NaN	NaN	23.2628	NaN	24.0346	23.5558	NaN	NaN	216	3	3	55.9	0.7	0.7	516.19	0	128.34	240090000	22	Q15149-4	Q15149-4	Plectin	PLEC	1682
21.0887	NaN	NaN	NaN	NaN	NaN	20.9701	NaN	NaN	3	3	3	2.2	2.2	2.2	227.71	0	4.0035	35401000	5	Q15154-5;Q15154-4;Q15154-2;Q15154	Q15154-5;Q15154-4;Q15154-2;Q15154	Pericentriolar material 1 protein	PCM1	1683
NaN	NaN	NaN	21.5693	NaN	21.6629	NaN	NaN	22.1846	3	3	3	4.7	4.7	4.7	134.19	0	8.4938	75013000	4	Q5JPE7-2;Q15155;Q5JPE7;Q5JPE7-3;P69849	Q5JPE7-2;Q15155;Q5JPE7;Q5JPE7-3;P69849	Nodal modulator 2;Nodal modulator 1;Nodal modulator 3	NOMO2;NOMO1;NOMO3	1684
NaN	NaN	NaN	NaN	NaN	NaN	NaN	NaN	21.456	1	1	1	4.7	4.7	4.7	37.98	0	49.387	70344000	9	Q15165-3;Q15165-1;Q15165	Q15165-3;Q15165-1;Q15165	Serum paraoxonase/arylesterase 2	PON2	1685
NaN	NaN	NaN	NaN	NaN	NaN	NaN	NaN	20.8146	1	1	1	12.1	12.1	12.1	18.354	0.002851	1.8313	12968000	1	Q15170;Q15170-2	Q15170;Q15170-2	Transcription elongation factor A protein-like 1	TCEAL1	1686
NaN	NaN	NaN	NaN	NaN	NaN	NaN	NaN	20.0398	1	1	1	5.9	5.9	5.9	32.66	0.0025253	1.8977	6840200	1	Q15181	Q15181	Inorganic pyrophosphatase	PPA1	1687
NaN	NaN	NaN	23.6608	23.1472	NaN	NaN	NaN	NaN	3	3	3	17.6	17.6	17.6	39.149	0	5.8744	98881000	4	Q15223-3;Q15223-2;Q15223	Q15223-3;Q15223-2;Q15223	Nectin-1	PVRL1	1688
26.3077	25.8092	22.8205	25.1372	23.9213	27.8301	26.4486	26.2831	24.7364	20	20	20	50.7	50.7	50.7	54.231	0	323.31	3678000000	214	Q15233;Q15233-2	Q15233;Q15233-2	Non-POU domain-containing octamer-binding protein	NONO	1689
NaN	NaN	NaN	NaN	NaN	NaN	NaN	NaN	21.1284	1	1	1	9.3	9.3	9.3	31.858	0	5.5686	14546000	1	Q15257-4;Q15257-3;Q15257-2;Q15257	Q15257-4;Q15257-3;Q15257-2;Q15257	Serine/threonine-protein phosphatase 2A activator	PPP2R4	1690
22.6206	NaN	NaN	24.0747	23.7358	22.2274	22.3487	24.2801	23.4293	5	5	5	7.1	7.1	7.1	162.1	0	30.39	361640000	16	Q15262;Q15262-2;Q15262-3;Q15262-4	Q15262;Q15262-2;Q15262-3;Q15262-4	Receptor-type tyrosine-protein phosphatase kappa	PTPRK	1691
22.3779	NaN	NaN	21.379	NaN	23.3415	22.5642	NaN	21.4416	7	7	7	9.6	9.6	9.6	102.45	0	16.478	167300000	15	Q15269	Q15269	Periodic tryptophan protein 2 homolog	PWP2	1692
25.5718	NaN	NaN	23.4276	NaN	27.1585	26.3598	24.0221	24.479	8	8	8	26.5	26.5	26.5	30.354	0	323.31	1939400000	49	Q15287-3;Q15287-2;Q15287	Q15287-3;Q15287-2;Q15287	RNA-binding protein with serine-rich domain 1	RNPS1	1693
22.8078	23.9591	NaN	NaN	NaN	21.9899	22.0247	NaN	23.6239	3	3	3	15.4	15.4	15.4	33.026	0	4.3735	198230000	8	Q15293-2;Q15293	Q15293-2;Q15293	Reticulocalbin-1	RCN1	1694
24.6015	25.4774	23.4822	26.2216	26.2045	26.6645	24.3164	26.857	27.2996	17	17	13	68	68	57	37.497	0	323.31	3001500000	164	Q15365	Q15365	Poly(rC)-binding protein 1	PCBP1	1695
24.3257	25.1721	23.6631	25.288	25.6801	25.5246	24.0607	26.0918	26.3551	14	10	10	71.9	60.1	60.1	34.917	0	177.82	1810600000	94	Q15366-4;Q15366-5;Q15366-3;Q15366-2;Q15366-6;Q15366;Q15366-7;Q15366-8;P57721-2;P57721-3;P57721-5;P57721-4;P57721	Q15366-4;Q15366-5;Q15366-3;Q15366-2;Q15366-6;Q15366;Q15366-7;Q15366-8	Poly(rC)-binding protein 2	PCBP2	1696
23.2078	23.6775	22.8844	23.2188	23.9771	23.7046	23.0533	23.6603	23.7046	5	5	5	64.3	64.3	64.3	12.473	0	50.335	501540000	24	Q15369;Q15369-2	Q15369;Q15369-2	Transcription elongation factor B polypeptide 1	TCEB1	1697
NaN	21.7953	NaN	22.1134	21.2881	23.2425	21.7092	NaN	22.3471	3	3	3	19.5	19.5	19.5	13.133	0	45.135	134780000	12	Q15370;Q15370-2	Q15370;Q15370-2	Transcription elongation factor B polypeptide 2	TCEB2	1698
NaN	NaN	NaN	NaN	NaN	NaN	NaN	20.0395	NaN	7	2	1	6	3	1.6	111.5	0.0007734	2.3367	6808500	1	Q15375-2;Q15375-4;Q15375;Q9UF33-2;Q9UF33-3;Q9UF33;Q15375-3;Q15375-5	Q15375-2;Q15375-4;Q15375;Q9UF33-2;Q9UF33-3;Q9UF33	Ephrin type-A receptor 7;Ephrin type-A receptor 6	EPHA7;EPHA6	1699
NaN	NaN	NaN	NaN	NaN	NaN	NaN	NaN	19.9402	1	1	1	18.5	18.5	18.5	20.497	0	2.6833	11759000	2	Q15382	Q15382	GTP-binding protein Rheb	RHEB	1700
NaN	NaN	NaN	NaN	NaN	NaN	NaN	NaN	NaN	1	1	1	9	9	9	16.298	0	8.2669	347870000	12	Q15388	Q15388	Mitochondrial import receptor subunit TOM20 homolog	TOMM20	1701
26.2991	22.4024	NaN	24.0241	NaN	27.3962	26.3763	23.1198	24.5616	38	38	38	37.6	37.6	37.6	135.58	0	180.05	1803000000	158	Q15393;Q15393-3;Q15393-2	Q15393	Splicing factor 3B subunit 3	SF3B3	1702
23.2344	NaN	NaN	NaN	NaN	23.2236	23.4544	NaN	22.995	6	6	6	12.7	12.7	12.7	73.584	0	13.68	159670000	9	Q15397	Q15397	Pumilio domain-containing protein KIAA0020	KIAA0020	1703
22.8331	22.7914	22.5932	23.6525	24.1954	25.4629	NaN	NaN	NaN	7	7	7	32.2	32.2	32.2	31.38	0	57.129	407310000	18	Q15417-3;Q15417;Q15417-2	Q15417-3;Q15417;Q15417-2	Calponin-3	CNN3	1704
24.2395	NaN	NaN	21.6653	NaN	25.9454	24.1352	NaN	21.4456	13	13	10	17.7	17.7	12.3	95.18	0	126.36	572340000	32	Q15424-2;Q15424;Q15424-4;Q15424-3	Q15424-2;Q15424;Q15424-4;Q15424-3	Scaffold attachment factor B1	SAFB	1705
NaN	NaN	NaN	NaN	NaN	21.3456	NaN	NaN	NaN	3	3	3	10.3	10.3	10.3	49.255	0	15.912	27189000	3	Q15428	Q15428	Splicing factor 3A subunit 2	SF3A2	1706
22.3327	NaN	NaN	23.7207	23.5981	23.997	24.1749	23.042	22.8042	11	11	8	22.2	22.2	18.7	86.16	0	55.208	385710000	35	Q15436;Q15436-2	Q15436	Protein transport protein Sec23A	SEC23A	1707
NaN	NaN	NaN	22.0683	NaN	22.8803	22.7134	NaN	NaN	10	7	7	21.6	18.1	18.1	86.478	0	16.417	126760000	13	Q15437	Q15437	Protein transport protein Sec23B	SEC23B	1708
23.512	NaN	NaN	23.0722	NaN	24.8777	23.9839	NaN	22.2991	10	10	10	16.9	16.9	16.9	81.677	0	22.237	319020000	22	Q15459-2;Q15459	Q15459-2;Q15459	Splicing factor 3A subunit 1	SF3A1	1709
NaN	NaN	NaN	NaN	NaN	NaN	20.8413	21.9755	NaN	2	2	2	11.6	11.6	11.6	29.091	0	3.5558	57932000	4	Q15555-2;Q15555-4;Q15555-5;Q15555-3;Q15555	Q15555-2;Q15555-4;Q15555-5;Q15555-3;Q15555	Microtubule-associated protein RP/EB family member 2	MAPRE2	1710
22.8501	23.7771	22.271	25.7756	26.1307	26.6768	27.395	25.1672	NaN	27	27	27	44.2	44.2	44.2	74.68	0	323.31	2149100000	149	Q15582	Q15582	Transforming growth factor-beta-induced protein ig-h3	TGFBI	1711
22.3562	21.1443	NaN	22.9173	NaN	23.3538	22.748	NaN	NaN	3	3	3	10.4	10.4	10.4	59.711	0	14.749	148960000	9	Q15637-4;Q15637-6;Q15637-7;Q15637-3;Q15637-2;Q15637;Q15637-5	Q15637-4;Q15637-6;Q15637-7;Q15637-3;Q15637-2;Q15637;Q15637-5	Splicing factor 1	SF1	1712
NaN	NaN	NaN	NaN	NaN	NaN	NaN	NaN	21.8483	1	1	1	14.3	14.3	14.3	22.084	0	89.815	70738000	4	Q15645-2;Q15645	Q15645-2;Q15645	Pachytene checkpoint protein 2 homolog	TRIP13	1713
NaN	NaN	NaN	NaN	NaN	NaN	NaN	NaN	NaN	2	2	2	13.9	13.9	13.9	50.287	0	7.3621	63242000	4	Q15654	Q15654	Thyroid receptor-interacting protein 6	TRIP6	1714
NaN	NaN	NaN	NaN	NaN	20.3062	NaN	NaN	NaN	2	2	2	2.8	2.8	2.8	135.26	0	3.4398	48037000	5	Q15678	Q15678	Tyrosine-protein phosphatase non-receptor type 14	PTPN14	1715
NaN	21.918	NaN	21.7471	21.9254	20.5236	21.2143	22.822	22.9054	6	6	6	24.6	24.6	24.6	29.999	0	5.8911	157560000	7	Q15691	Q15691	Microtubule-associated protein RP/EB family member 1	MAPRE1	1716
24.0044	22.0901	21.8772	22.7276	NaN	26.7562	24.5152	23.545	24.5602	16	16	16	53.4	53.4	53.4	36.091	0	130.85	1067600000	61	Q15717;Q15717-2	Q15717;Q15717-2	ELAV-like protein 1	ELAVL1	1717
22.9884	23.3073	23.54	23.8354	23.1485	NaN	23.3173	24.7038	25.6245	4	4	4	17.7	17.7	17.7	41.9	0	323.31	595690000	26	Q15738	Q15738	Sterol-4-alpha-carboxylate 3-dehydrogenase, decarboxylating	NSDHL	1718
NaN	NaN	NaN	NaN	NaN	NaN	NaN	22.4591	21.3433	2	2	2	12.6	12.6	12.6	41.076	0	16.586	58846000	7	Q15743	Q15743	Ovarian cancer G-protein coupled receptor 1	GPR68	1719
21.4203	NaN	NaN	21.0869	NaN	23.4865	NaN	21.9676	20.9139	4	4	4	4.1	4.1	4.1	197.4	0	10.327	131460000	7	Q15746-4;Q15746-5;Q15746-2;Q15746-3;Q15746-6;Q15746;Q15746-11;Q15746-7;Q15746-9	Q15746-4;Q15746-5;Q15746-2;Q15746-3;Q15746-6;Q15746;Q15746-11;Q15746-7	Myosin light chain kinase, smooth muscle;Myosin light chain kinase, smooth muscle, deglutamylated form	MYLK	1720
23.4443	24.9987	25.046	28.5634	27.059	23.6538	25.7937	27.8715	26.5304	9	9	9	16.5	16.5	16.5	56.598	0	323.31	4239300000	79	Q15758;Q15758-3;Q15758-2	Q15758;Q15758-3;Q15758-2	Neutral amino acid transporter B(0)	SLC1A5	1721
NaN	NaN	NaN	20.9762	NaN	NaN	NaN	NaN	NaN	1	1	1	6.8	6.8	6.8	35.834	0	3.6712	8596200	1	Q15768	Q15768	Ephrin-B3	EFNB3	1722
NaN	NaN	NaN	NaN	NaN	NaN	22.9006	NaN	NaN	2	2	2	19.4	19.4	19.4	28.147	0	10.255	38390000	4	Q15773	Q15773	Myeloid leukemia factor 2	MLF2	1723
22.6428	23.4223	23.6475	22.9497	23.5797	21.6523	23.4759	23.7523	22.3354	5	5	5	20.7	20.7	20.7	34.559	0	61.714	271470000	39	Q15785	Q15785	Mitochondrial import receptor subunit TOM34	TOMM34	1724
NaN	NaN	NaN	NaN	NaN	NaN	NaN	NaN	21.2962	2	2	1	17.9	17.9	6.9	16.363	0	37.626	19606000	1	Q15819	Q15819	Ubiquitin-conjugating enzyme E2 variant 2	UBE2V2	1725
23.2724	23.6233	24.2619	25.3206	23.5612	21.8539	24.4744	23.5515	23.5963	3	3	3	41	41	41	11.309	0	320.22	488770000	29	Q15836;P63027	Q15836	Vesicle-associated membrane protein 3	VAMP3	1726
NaN	NaN	NaN	NaN	NaN	NaN	NaN	NaN	NaN	1	1	1	23.5	23.5	23.5	9.0714	0.00075047	2.109	74683000	5	Q15843	Q15843	NEDD8	NEDD8	1727
23.472	22.6372	23.2192	23.8333	22.6002	22.0119	23.6038	22.245	22.7599	4	4	4	14.7	14.7	14.7	61.277	0	106.63	290930000	25	Q15942;Q15942-2	Q15942;Q15942-2	Zyxin	ZYX	1728
22.8866	23.3744	22.8979	23.1826	21.6736	23.6894	22.5283	21.8483	22.4544	6	6	6	20.4	20.4	20.4	50.58	0	18.027	230220000	12	Q16181-2;Q16181	Q16181-2;Q16181	Septin-7	2007-09-01	1729
NaN	NaN	NaN	NaN	NaN	NaN	NaN	NaN	21.6264	1	1	1	3.7	3.7	3.7	42.153	0	40.189	36193000	5	Q16186	Q16186	Proteasomal ubiquitin receptor ADRM1	ADRM1	1730
NaN	23.2768	23.3273	22.9127	25.0055	NaN	NaN	NaN	NaN	5	5	5	30.5	30.5	30.5	29.13	0	5.7645	171390000	7	Q16270;Q16270-2	Q16270;Q16270-2	Insulin-like growth factor-binding protein 7	IGFBP7	1731
NaN	NaN	NaN	20.2707	NaN	NaN	NaN	NaN	NaN	1	1	1	10.6	10.6	10.6	21.299	0	32.375	5271200	1	Q16342-5;Q16342-2;Q16342-4;Q16342-3;Q16342	Q16342-5;Q16342-2;Q16342-4;Q16342-3;Q16342	Programmed cell death protein 2	PDCD2	1732
NaN	NaN	NaN	NaN	NaN	NaN	NaN	NaN	NaN	1	1	1	1	1	1	201.77	0.00077519	2.37	13900000	2	Q16363-2;Q16363	Q16363-2;Q16363	Laminin subunit alpha-4	LAMA4	1733
NaN	NaN	NaN	NaN	NaN	NaN	NaN	NaN	21.1524	1	1	1	5.2	5.2	5.2	51.311	0.0035039	1.7375	34343000	2	Q16401-2;Q16401	Q16401-2;Q16401	26S proteasome non-ATPase regulatory subunit 5	PSMD5	1734
22.3335	23.5151	23.137	22.6555	22.6878	22.3696	22.5738	22.0394	21.5587	5	5	5	10.6	10.6	10.6	106.22	0	8.6222	132300000	9	Q16513-3;Q16513-2;Q16513;Q16513-5;Q16513-4	Q16513-3;Q16513-2;Q16513;Q16513-5;Q16513-4	Serine/threonine-protein kinase N2	PKN2	1735
NaN	NaN	NaN	NaN	21.4983	NaN	NaN	NaN	NaN	2	2	2	17.1	17.1	17.1	20.954	0.00078802	2.499	23387000	3	Q16527	Q16527	Cysteine and glycine-rich protein 2	CSRP2	1736
23.0393	22.6003	23.1117	23.2155	NaN	23.3181	22.6604	21.7516	23.1442	7	7	7	8	8	8	126.97	0	31.261	299660000	32	Q16531;Q16531-2	Q16531;Q16531-2	DNA damage-binding protein 1	DDB1	1737
NaN	NaN	NaN	22.0341	NaN	NaN	22.0855	22.533	22.3611	4	4	4	15.6	15.6	15.6	54.699	0	21.144	106760000	14	Q16537;Q16537-2;Q16537-3	Q16537;Q16537-2;Q16537-3	Serine/threonine-protein phosphatase 2A 56 kDa regulatory subunit epsilon isoform	PPP2R5E	1738
NaN	NaN	NaN	NaN	NaN	NaN	NaN	19.8172	NaN	1	1	1	9.4	9.4	9.4	41.493	0.00078094	2.4318	5835800	1	Q16539-2;Q16539	Q16539-2;Q16539	Mitogen-activated protein kinase 14	MAPK14	1739
NaN	NaN	NaN	NaN	NaN	NaN	NaN	NaN	NaN	1	1	1	12.4	12.4	12.4	17.781	0	2.6963	6764000	1	Q16540	Q16540	39S ribosomal protein L23, mitochondrial	MRPL23	1740
22.3566	21.7804	NaN	23.3568	22.317	NaN	22.1163	22.2044	23.3442	3	3	3	9.8	9.8	9.8	44.468	0	4.2482	192540000	8	Q16543	Q16543	Hsp90 co-chaperone Cdc37;Hsp90 co-chaperone Cdc37, N-terminally processed	CDC37	1741
24.9378	24.8535	23.5123	24.6524	24.0005	24.1247	25.4383	26.4765	25.4268	15	14	14	44.2	41.2	41.2	58.162	0	323.31	1418500000	81	Q16555-2;Q16555	Q16555-2;Q16555	Dihydropyrimidinase-related protein 2	DPYSL2	1742
NaN	NaN	NaN	NaN	NaN	NaN	NaN	NaN	21.2019	1	1	1	4.6	4.6	4.6	26.411	0	11.687	70179000	2	Q16563-2;Q16563	Q16563-2;Q16563	Synaptophysin-like protein 1	SYPL1	1743
26.1713	25.5279	24.6154	25.9315	25.5549	25.4403	25.0661	25.9639	25.9847	8	8	5	31.1	31.1	26.4	47.82	0	323.31	1802700000	71	Q16576;Q16576-2	Q16576;Q16576-2	Histone-binding protein RBBP7	RBBP7	1744
NaN	NaN	NaN	NaN	NaN	NaN	NaN	NaN	NaN	1	1	1	6	6	6	34.776	0	24.872	0	1	Q16585	Q16585	Beta-sarcoglycan	SGCB	1745
NaN	NaN	NaN	NaN	NaN	20.3606	NaN	NaN	NaN	1	1	1	7.6	7.6	7.6	27.622	0.0014668	2.0001	10209000	1	Q9HBM6;Q16594	Q9HBM6;Q16594	Transcription initiation factor TFIID subunit 9B;Transcription initiation factor TFIID subunit 9	TAF9B;TAF9	1746
NaN	NaN	NaN	22.1665	NaN	NaN	NaN	NaN	NaN	2	2	2	16	16	16	23.323	0	26.801	31542000	2	Q16625-5;Q16625-4;Q16625-2;Q16625-3;Q16625	Q16625-5;Q16625-4;Q16625-2;Q16625-3;Q16625	Occludin	OCLN	1747
NaN	NaN	21.2611	NaN	NaN	21.3646	20.763	NaN	NaN	3	3	3	35.6	35.6	35.6	15.257	0	16.658	75282000	6	Q16629-3;Q16629-2;Q16629-4;Q16629	Q16629-3;Q16629-2;Q16629-4;Q16629	Serine/arginine-rich splicing factor 7	SRSF7	1748
NaN	NaN	NaN	NaN	NaN	NaN	NaN	NaN	NaN	1	1	1	7.2	7.2	7.2	27.135	0	4.2991	35013000	1	Q16637-4;Q16637-2;Q16637-3;Q16637	Q16637-4;Q16637-2;Q16637-3;Q16637	Survival motor neuron protein	SMN1	1749
26.1032	21.2369	21.7214	21.8415	19.8675	27.2492	22.6198	NaN	20.5888	11	11	11	25.7	25.7	25.7	71.428	0	194.91	1777500000	62	Q16643;Q16643-2;Q16643-3	Q16643;Q16643-2;Q16643-3	Drebrin	DBN1	1750
24.7712	24.6318	23.5759	24.1578	23.9536	23.4826	24.9711	23.9668	25.5727	9	9	9	29.4	29.4	29.4	54.529	0	78.154	766200000	35	Q16658	Q16658	Fascin	FSCN1	1751
NaN	NaN	NaN	NaN	NaN	22.294	23.0511	NaN	NaN	5	5	5	12	12	12	75.935	0	26.252	109660000	15	Q16666-3;Q16666-2;Q16666;Q16666-6;Q6K0P9-6;Q6K0P9-5;Q6K0P9-4;Q6K0P9-3;Q6K0P9-2;Q6K0P9	Q16666-3;Q16666-2;Q16666	Gamma-interferon-inducible protein 16	IFI16	1752
NaN	20.8998	NaN	27.0812	25.5235	23.1398	NaN	NaN	NaN	24	24	24	45.3	45.3	45.3	60.845	0	168.72	746550000	67	Q16678	Q16678	Cytochrome P450 1B1	CYP1B1	1753
23.24	23.1468	22.1061	23.8268	22.9414	23.7747	23.6018	21.7931	22.7626	4	4	4	16.9	16.9	16.9	34.994	0	23.345	286410000	15	Q16698-2;Q16698	Q16698-2;Q16698	2,4-dienoyl-CoA reductase, mitochondrial	DECR1	1754
NaN	22.4926	NaN	22.885	22.3516	24.0367	NaN	22.4469	22.2596	7	7	7	57.8	57.8	57.8	13.459	0	17.369	281560000	25	Q16718;Q16718-2	Q16718;Q16718-2	NADH dehydrogenase [ubiquinone] 1 alpha subcomplex subunit 5	NDUFA5	1755
NaN	NaN	NaN	NaN	NaN	NaN	NaN	NaN	21.7592	2	2	2	15	15	15	34.634	0	6.2651	22524000	3	Q16719-2;Q16719	Q16719-2;Q16719	Kynureninase	KYNU	1756
NaN	NaN	NaN	NaN	NaN	NaN	NaN	21.8705	NaN	2	2	2	17.3	17.3	17.3	30.18	0	2.6562	31416000	2	Q16740	Q16740	ATP-dependent Clp protease proteolytic subunit, mitochondrial	CLPP	1757
NaN	NaN	NaN	NaN	NaN	NaN	NaN	22.303	NaN	2	2	2	13.1	13.1	13.1	23.845	0	10.112	49829000	3	Q16763	Q16763	Ubiquitin-conjugating enzyme E2 S	UBE2S	1758
NaN	NaN	NaN	23.834	26.369	24.9774	22.7712	27.4697	21.7131	7	7	7	22.7	22.7	22.7	49.697	0	304.32	2062600000	46	Q16790	Q16790	Carbonic anhydrase 9	CA9	1759
22.9074	23.4713	22.9253	22.3473	22.9083	21.8534	22.3328	22.2558	22.2347	3	3	3	10.1	10.1	10.1	42.509	0	10.522	171030000	10	Q16795	Q16795	NADH dehydrogenase [ubiquinone] 1 alpha subcomplex subunit 9, mitochondrial	NDUFA9	1760
NaN	NaN	NaN	22.0785	NaN	20.5541	NaN	NaN	NaN	3	3	3	8.8	8.8	8.8	70.698	0	6.1874	34199000	3	Q16822;Q16822-2;Q16822-3	Q16822;Q16822-2	Phosphoenolpyruvate carboxykinase [GTP], mitochondrial	PCK2	1761
NaN	NaN	NaN	25.1206	22.5291	20.992	23.7338	26.4983	25.3084	16	16	16	24.1	24.1	24.1	96.735	0	82.193	1008700000	52	Q16832	Q16832	Discoidin domain-containing receptor 2	DDR2	1762
NaN	23.0608	NaN	NaN	NaN	20.0849	NaN	NaN	NaN	3	3	3	15	15	15	34.293	0	3.9695	26476000	4	Q16836;Q16836-3;Q16836-2	Q16836;Q16836-3;Q16836-2	Hydroxyacyl-coenzyme A dehydrogenase, mitochondrial	HADH	1763
NaN	NaN	NaN	NaN	NaN	NaN	NaN	20.9116	NaN	3	3	3	10.9	10.9	10.9	46.312	0	3.3851	37230000	5	Q16850-2;Q16850	Q16850-2;Q16850	Lanosterol 14-alpha demethylase	CYP51A1	1764
NaN	NaN	NaN	NaN	NaN	NaN	NaN	NaN	19.9481	1	1	1	3.5	3.5	3.5	22.972	0.00079083	2.5166	39946000	4	Q16878	Q16878	Cysteine dioxygenase type 1	CDO1	1765
NaN	NaN	NaN	21.7121	NaN	NaN	NaN	NaN	NaN	3	3	3	9.6	9.6	9.6	54.753	0.007109	1.4966	27162000	1	Q16881-5;Q16881-2;Q16881-4;Q16881-3;Q16881-6;Q16881;Q16881-7	Q16881-5;Q16881-2;Q16881-4;Q16881-3;Q16881-6;Q16881;Q16881-7	Thioredoxin reductase 1, cytoplasmic	TXNRD1	1766
25.5301	26.7231	25.7109	26.0809	26.1611	27.3651	25.8714	27.0309	25.7432	28	28	28	45.2	45.2	45.2	82.624	0	253.63	3364000000	122	Q16891-2;Q16891-4;Q16891;Q16891-3	Q16891-2;Q16891-4;Q16891;Q16891-3	MICOS complex subunit MIC60	IMMT	1767
27.5121	21.2526	NaN	24.0988	NaN	27.1899	28.4889	23.4241	25.2411	34	34	34	50.3	50.3	50.3	85.104	0	323.31	3860300000	211	Q1KMD3	Q1KMD3	Heterogeneous nuclear ribonucleoprotein U-like protein 2	HNRNPUL2	1768
NaN	NaN	NaN	22.7254	NaN	21.251	NaN	22.1373	21.821	6	6	6	7.8	7.8	7.8	110.11	0	12.925	103950000	7	Q24JP5;Q24JP5-2;Q24JP5-4;Q24JP5-3	Q24JP5;Q24JP5-2;Q24JP5-4	Transmembrane protein 132A	TMEM132A	1769
24.1781	23.8661	NaN	24.8642	23.8753	22.9412	25.129	25.4324	24.5789	11	11	11	18.2	18.2	18.2	135.62	0	90.565	775800000	20	Q27J81;Q27J81-2;Q27J81-3	Q27J81;Q27J81-2	Inverted formin-2	INF2	1770
NaN	NaN	NaN	NaN	NaN	NaN	NaN	NaN	22.765	1	1	1	5.2	5.2	5.2	42.915	0	16.005	115030000	2	Q29983	Q29983	MHC class I polypeptide-related sequence A	MICA	1771
21.7506	22.141	NaN	21.7802	21.2946	NaN	20.7483	NaN	21.3199	4	4	4	5.2	5.2	5.2	150.83	0	4.0143	75426000	9	Q29RF7	Q29RF7	Sister chromatid cohesion protein PDS5 homolog A	PDS5A	1772
NaN	NaN	NaN	NaN	NaN	NaN	NaN	NaN	NaN	1	1	1	1.7	1.7	1.7	93.577	0.0041594	1.6597	6603600	1	Q2M2I8-2;Q2M2I8	Q2M2I8-2;Q2M2I8	AP2-associated protein kinase 1	AAK1	1773
NaN	NaN	NaN	NaN	NaN	21.0012	NaN	NaN	NaN	2	2	2	3.5	3.5	3.5	91.809	0	3.2612	25080000	3	Q2NL82	Q2NL82	Pre-rRNA-processing protein TSR1 homolog	TSR1	1774
NaN	NaN	NaN	NaN	NaN	23.3573	21.9295	NaN	NaN	4	4	4	11.1	11.1	11.1	57.543	0	24.062	85152000	6	Q2TAY7;Q2TAY7-2	Q2TAY7	WD40 repeat-containing protein SMU1;WD40 repeat-containing protein SMU1, N-terminally processed	SMU1	1775
NaN	NaN	NaN	NaN	NaN	20.5851	NaN	NaN	NaN	2	2	2	5	5	5	75.235	0	4.5811	10606000	2	Q2TB10	Q2TB10	Zinc finger protein 800	ZNF800	1776
NaN	NaN	NaN	NaN	NaN	NaN	NaN	19.6959	NaN	2	2	2	9.5	9.5	9.5	56.107	0	5.4249	11035000	2	Q2VPK5;Q2VPK5-3;Q2VPK5-5	Q2VPK5;Q2VPK5-3;Q2VPK5-5	Cytoplasmic tRNA 2-thiolation protein 2	CTU2	1777
NaN	NaN	NaN	NaN	NaN	NaN	NaN	25.4833	NaN	6	4	2	31.2	22.6	17.3	30.056	0	284.54	305550000	11	Q30154	Q30154	HLA class II histocompatibility antigen, DR beta 5 chain	HLA-DRB5	1778
NaN	NaN	NaN	23.0163	22.7191	NaN	NaN	23.5339	22.3886	3	3	3	15.8	15.8	15.8	29.633	0	10.283	175480000	10	Q30201-2;Q30201-8;Q30201-5;Q30201;Q30201-4;Q30201-3	Q30201-2;Q30201-8;Q30201-5;Q30201;Q30201-4;Q30201-3	Hereditary hemochromatosis protein	HFE	1779
23.1649	22.7732	23.4154	23.8341	24.0646	23.7734	23.7383	23.7151	23.9317	6	6	6	13.2	13.2	13.2	82.688	0	59.21	503010000	26	Q32MZ4-3;Q32MZ4-2;Q32MZ4;Q32MZ4-4	Q32MZ4-3;Q32MZ4-2;Q32MZ4	Leucine-rich repeat flightless-interacting protein 1	LRRFIP1	1780
NaN	NaN	NaN	22.8717	NaN	22.6264	NaN	NaN	NaN	6	6	6	14.9	14.9	14.9	83.393	0	9.3204	77243000	9	Q32P28;Q32P28-4;Q32P28-3;Q32P28-2	Q32P28;Q32P28-4;Q32P28-3;Q32P28-2	Prolyl 3-hydroxylase 1	LEPRE1	1781
22.0232	21.1774	NaN	NaN	NaN	21.018	22.0311	NaN	NaN	5	5	5	10.7	10.7	10.7	88.725	0	3.6586	64978000	6	Q3KQU3-2;Q3KQU3-4;Q3KQU3;Q3KQU3-3	Q3KQU3-2;Q3KQU3-4;Q3KQU3	MAP7 domain-containing protein 1	MAP7D1	1782
NaN	NaN	NaN	22.2547	NaN	NaN	NaN	NaN	NaN	2	2	2	7.8	7.8	7.8	58.946	0	9.214	38176000	3	Q3LXA3	Q3LXA3	Bifunctional ATP-dependent dihydroxyacetone kinase/FAD-AMP lyase (cyclizing);ATP-dependent dihydroxyacetone kinase;FAD-AMP lyase (cyclizing)	DAK	1783
NaN	NaN	NaN	NaN	NaN	NaN	NaN	NaN	19.6566	1	1	1	3.1	3.1	3.1	57.244	0.0028777	1.8759	15700000	1	Q3SY69-3;Q3SY69	Q3SY69-3;Q3SY69	Mitochondrial 10-formyltetrahydrofolate dehydrogenase	ALDH1L2	1784
22.722	NaN	NaN	23.982	NaN	NaN	NaN	24.298	23.6906	11	2	2	21.4	7.4	7.4	49.775	0	52.851	352980000	7	Q3ZCM7	Q3ZCM7	Tubulin beta-8 chain	TUBB8	1785
NaN	22.35	22.4928	23.6098	22.7582	23.1831	NaN	23.5414	23.6837	6	6	6	33.3	33.3	33.3	27.578	0	22.913	303330000	21	Q3ZCQ8-3;Q3ZCQ8;Q3ZCQ8-2	Q3ZCQ8-3;Q3ZCQ8;Q3ZCQ8-2	Mitochondrial import inner membrane translocase subunit TIM50	TIMM50	1786
NaN	NaN	NaN	NaN	NaN	NaN	NaN	NaN	NaN	1	1	1	2.1	2.1	2.1	66.898	0.0035026	1.7336	3034200	1	Q4G0J3;Q4G0J3-3	Q4G0J3;Q4G0J3-3	La-related protein 7	LARP7	1787
22.7798	23.0158	22.5516	23.606	24.1475	NaN	22.5109	25.7088	23.7554	7	7	7	8.9	8.9	8.9	103.96	0	96.228	640960000	24	Q4KMQ2-3;Q4KMQ2;Q4KMQ2-2;Q4KMQ2-4	Q4KMQ2-3;Q4KMQ2;Q4KMQ2-2;Q4KMQ2-4	Anoctamin-6	ANO6	1788
NaN	NaN	NaN	NaN	NaN	24.8113	NaN	NaN	NaN	12	12	12	18.6	18.6	18.6	102.23	0	53.785	201450000	17	Q4L180-3;Q4L180-7;Q4L180-2;Q4L180;Q4L180-6;Q4L180-5	Q4L180-3;Q4L180-7;Q4L180-2;Q4L180;Q4L180-6;Q4L180-5	Filamin A-interacting protein 1-like	FILIP1L	1789
NaN	NaN	NaN	NaN	NaN	NaN	NaN	NaN	NaN	1	1	1	9.4	9.4	9.4	15.095	0	4.2585	13891000	1	Q4U2R6	Q4U2R6	39S ribosomal protein L51, mitochondrial	MRPL51	1790
NaN	NaN	NaN	21.7832	23.1757	21.5995	NaN	NaN	NaN	2	2	2	37.6	37.6	37.6	12.957	0	19.771	51220000	7	Q4V321;P0CL80-2;P0CL80;Q13070;Q13069;Q13065;P0CL81;P0CL82;O76087;Q4V326;A6NER3;A6NDE8;A1L429;Q6NT46;Q13066;Q9UEU5;Q13065-2	Q4V321;P0CL80-2;P0CL80;Q13070;Q13069;Q13065;P0CL81;P0CL82;O76087;Q4V326;A6NER3;A6NDE8;A1L429;Q6NT46;Q13066;Q9UEU5;Q13065-2	G antigen 13;G antigen 12F;G antigen 6;G antigen 5;G antigen 1;G antigen 12G;G antigen 12I;G antigen 7;G antigen 2E;G antigen 12J;G antigen 12H;G antigen 12B/C/D/E;G antigen 2A;G antigen 2B/2C;G antigen 2D	GAGE13;GAGE12F;GAGE6;GAGE5;GAGE1;GAGE12G;GAGE12I;GAGE7;GAGE2E;GAGE12J;GAGE12H;GAGE12B;GAGE2A;GAGE2B;GAGE2D	1791
NaN	NaN	NaN	NaN	NaN	NaN	NaN	NaN	19.0172	1	1	1	6.7	6.7	6.7	40.42	0	5.7661	3366700	1	Q9BRT8-2;Q5JTY5-2;Q9BRT8;Q8IUF1;Q5RIA9;Q5JTY5;Q4V339	Q9BRT8-2;Q5JTY5-2;Q9BRT8;Q8IUF1;Q5RIA9;Q5JTY5;Q4V339	COBW domain-containing protein 1;COBW domain-containing protein 3;COBW domain-containing protein 2;COBW domain-containing protein 5;COBW domain-containing protein 6	CBWD1;CBWD3;CBWD2;CBWD5;CBWD6	1792
NaN	NaN	NaN	29.4407	27.2845	24.1552	NaN	24.0606	21.6428	5	5	5	21.6	21.6	21.6	29.203	0	323.31	3541600000	43	Q4V9L6	Q4V9L6	Transmembrane protein 119	TMEM119	1793
NaN	NaN	NaN	NaN	NaN	NaN	NaN	NaN	NaN	1	1	1	6.9	6.9	6.9	16.045	0.0014771	2.023	8889600	1	Q9BQE9-4;Q9BQE9-3;Q9BQE9;Q4VC05;Q8WUZ0;Q4VC05-2;Q8WUZ0-2	Q9BQE9-4;Q9BQE9-3;Q9BQE9;Q4VC05;Q8WUZ0;Q4VC05-2;Q8WUZ0-2	B-cell CLL/lymphoma 7 protein family member B;B-cell CLL/lymphoma 7 protein family member A;B-cell CLL/lymphoma 7 protein family member C	BCL7B;BCL7A;BCL7C	1794
NaN	NaN	NaN	NaN	NaN	NaN	NaN	NaN	NaN	1	1	1	3.9	3.9	3.9	37.19	0.0067958	1.5182	1376200	1	Q52LJ0-1;Q52LJ0	Q52LJ0-1;Q52LJ0	Protein FAM98B	FAM98B	1795
21.8693	22.5017	NaN	25.0009	24.8732	23.5593	22.2543	24.5665	23.5297	13	13	13	14.9	14.9	14.9	132.89	0	40.374	539670000	35	Q53EP0;Q53EP0-2	Q53EP0	Fibronectin type III domain-containing protein 3B	FNDC3B	1796
NaN	NaN	NaN	22.4487	NaN	22.0595	22.716	24.5224	24.2167	6	6	6	15.4	15.4	15.4	48.705	0	42.747	385750000	17	Q53EU6	Q53EU6	Glycerol-3-phosphate acyltransferase 3	AGPAT9	1797
NaN	NaN	NaN	NaN	NaN	NaN	NaN	NaN	20.4928	1	1	1	9.8	9.8	9.8	17.371	0	36.813	32753000	8	Q9P0S3;Q53FV1	Q9P0S3;Q53FV1	ORM1-like protein 1;ORM1-like protein 2	ORMDL1;ORMDL2	1798
NaN	22.6579	22.6293	23.3059	22.8181	NaN	22.3112	22.7781	22.7118	5	5	5	15.4	15.4	15.4	34.324	0	12.163	179350000	9	Q53GQ0	Q53GQ0	Very-long-chain 3-oxoacyl-CoA reductase	HSD17B12	1799
NaN	NaN	NaN	NaN	NaN	NaN	NaN	NaN	NaN	2	2	2	4.1	4.1	4.1	65.38	0	4.1591	37467000	5	Q53GS9;Q53GS9-3;Q53GS9-2	Q53GS9;Q53GS9-3;Q53GS9-2	U4/U6.U5 tri-snRNP-associated protein 2	USP39	1800
NaN	NaN	NaN	NaN	NaN	NaN	NaN	22.3762	NaN	3	3	3	18.5	18.5	18.5	26.439	0	7.3508	47476000	6	Q53H96-2;Q53H96	Q53H96-2;Q53H96	Pyrroline-5-carboxylate reductase 3	PYCRL	1801
NaN	NaN	NaN	NaN	NaN	NaN	NaN	NaN	NaN	1	1	1	8.9	8.9	8.9	31.323	0	2.8594	66033000	3	Q53HL2	Q53HL2	Borealin	CDCA8	1802
NaN	NaN	NaN	NaN	NaN	NaN	21.9321	23.386	22.0005	2	2	2	16.7	16.7	16.7	25.087	0	20.371	152700000	13	Q53TN4-3;Q53TN4	Q53TN4-3;Q53TN4	Cytochrome b reductase 1	CYBRD1	1803
NaN	NaN	NaN	NaN	NaN	NaN	NaN	NaN	NaN	7	1	1	14.6	4.8	4.8	42.003	0.0028756	1.8739	95467000	2	Q562R1	Q562R1	Beta-actin-like protein 2	ACTBL2	1804
NaN	NaN	NaN	NaN	NaN	NaN	NaN	NaN	21.3249	1	1	1	14	14	14	21.789	0	21.722	73933000	3	Q587I9	Q587I9	Vesicle transport protein SFT2C	SFT2D3	1805
NaN	NaN	NaN	23.0826	NaN	22.6921	NaN	NaN	22.9857	4	1	1	14.4	4.5	4.5	44.348	0	13.687	192640000	7	Q58FF8	Q58FF8	Putative heat shock protein HSP 90-beta 2	HSP90AB2P	1806
22.8153	23.1516	23.9916	25.4323	24.1298	23.1371	22.4114	23.7199	22.4924	4	4	2	24.1	24.1	8.6	31.245	0	22.184	426820000	19	Q5BJH7-4;Q5BJH7-5;Q5BJH7-6;Q5BJH7-3;Q5BJH7	Q5BJH7-4;Q5BJH7-5;Q5BJH7-6;Q5BJH7-3;Q5BJH7	Protein YIF1B	YIF1B	1807
NaN	NaN	NaN	20.8644	NaN	NaN	NaN	NaN	NaN	3	1	1	21.6	5.7	5.7	31.174	0	8.1135	7954800	2	Q5BJH7-2	Q5BJH7-2	Protein YIF1B	YIF1B	1808
26.1979	NaN	NaN	23.4344	NaN	24.6333	25.4007	NaN	22.678	12	12	12	32.5	32.5	32.5	65.653	0	158.93	717530000	59	Q5BKZ1;Q5BKZ1-2;Q5BKZ1-3	Q5BKZ1	DBIRD complex subunit ZNF326	ZNF326	1809
NaN	NaN	NaN	NaN	NaN	NaN	NaN	22.0188	22.5254	2	2	2	3.5	3.5	3.5	106.71	0	4.2882	65153000	4	Q5GLZ8-6;Q5GLZ8-3;Q5GLZ8-2;Q5GLZ8	Q5GLZ8-6;Q5GLZ8-3;Q5GLZ8-2;Q5GLZ8	Probable E3 ubiquitin-protein ligase HERC4	HERC4	1810
NaN	NaN	NaN	NaN	NaN	NaN	NaN	19.8577	NaN	1	1	1	2.1	2.1	2.1	103.59	0.0014744	2.0158	13350000	2	Q5HYA8-3;Q5HYA8	Q5HYA8-3;Q5HYA8	Meckelin	TMEM67	1811
NaN	NaN	NaN	NaN	NaN	NaN	NaN	20.8025	22.1804	1	1	1	8.9	8.9	8.9	26.422	0	4.2632	51650000	5	Q5HYI8	Q5HYI8	Rab-like protein 3	RABL3	1812
NaN	NaN	NaN	NaN	NaN	NaN	NaN	21.2842	22.2502	2	2	2	11	11	11	15.088	0	5.2351	75796000	10	Q5J8M3-3;Q5J8M3-2;Q5J8M3	Q5J8M3-3;Q5J8M3-2;Q5J8M3	ER membrane protein complex subunit 4	EMC4	1813
NaN	NaN	NaN	NaN	NaN	NaN	NaN	NaN	NaN	3	3	3	14.9	14.9	14.9	30.1	0	5.1684	28464000	4	Q5JQC4	Q5JQC4	Cancer/testis antigen 47A	CT47A1	1814
NaN	NaN	NaN	22.3692	NaN	23.7759	NaN	NaN	NaN	8	8	8	7.4	7.4	7.4	213.7	0	22.298	109080000	9	Q5JRA6;Q5JRA6-2;Q5JRA6-4	Q5JRA6;Q5JRA6-2;Q5JRA6-4	Melanoma inhibitory activity protein 3	MIA3	1815
23.6463	23.7736	NaN	23.598	22.5384	23.1466	24.0602	24.539	25.3675	13	13	13	21.8	21.8	21.8	117.51	0	59.191	645350000	50	Q5JRX3-2;Q5JRX3;Q5JRX3-3	Q5JRX3-2;Q5JRX3;Q5JRX3-3	Presequence protease, mitochondrial	PITRM1	1816
24.4903	NaN	NaN	24.21	NaN	24.6009	25.1293	NaN	23.0281	10	10	10	13.5	13.5	13.5	132.71	0	62.031	581690000	34	Q5JTH9-2;Q5JTH9-3;Q5JTH9	Q5JTH9-2;Q5JTH9-3;Q5JTH9	RRP12-like protein	RRP12	1817
NaN	NaN	NaN	NaN	NaN	NaN	NaN	NaN	21.2829	1	1	1	16.5	16.5	16.5	9.4275	0	4.1492	26442000	4	Q5JTJ3-3;Q5JTJ3;Q5JTJ3-2	Q5JTJ3-3;Q5JTJ3;Q5JTJ3-2	Cytochrome c oxidase assembly factor 6 homolog	COA6	1818
23.2076	25.3404	24.3237	25.2084	24.5644	24.3483	22.9464	24.4151	24.2587	10	10	1	26.1	26.1	2.4	66.248	0	113.14	716960000	46	Q5JTV8	Q5JTV8	Torsin-1A-interacting protein 1	TOR1AIP1	1819
NaN	NaN	NaN	NaN	NaN	NaN	NaN	NaN	NaN	10	1	1	26.2	2.6	2.6	66.319	0.0038341	1.6946	38649000	3	Q5JTV8-3;Q5JTV8-2	Q5JTV8-3;Q5JTV8-2	Torsin-1A-interacting protein 1	TOR1AIP1	1820
NaN	NaN	NaN	NaN	NaN	NaN	NaN	19.5171	NaN	1	1	1	1.5	1.5	1.5	107.34	0	4.1665	10515000	3	Q5JTZ9	Q5JTZ9	Alanine--tRNA ligase, mitochondrial	AARS2	1821
23.2922	NaN	NaN	NaN	NaN	23.478	22.8513	NaN	NaN	8	8	8	18.7	18.7	18.7	84.468	0	33.332	165900000	21	Q5QJE6	Q5QJE6	Deoxynucleotidyltransferase terminal-interacting protein 2	DNTTIP2	1822
NaN	NaN	NaN	NaN	NaN	NaN	NaN	21.7885	NaN	1	1	1	11.9	11.9	11.9	13.291	0	19.522	69225000	4	Q5RI15;Q5RI15-2	Q5RI15;Q5RI15-2	Cytochrome c oxidase protein 20 homolog	COX20	1823
NaN	NaN	NaN	NaN	NaN	22.5006	NaN	NaN	NaN	2	2	2	14.3	14.3	14.3	28.235	0	24.119	111110000	9	Q5RKV6	Q5RKV6	Exosome complex component MTR3	EXOSC6	1824
NaN	NaN	NaN	19.5179	NaN	NaN	NaN	NaN	NaN	2	2	2	3.3	3.3	3.3	72.235	0	5.1555	6030300	2	Q5SNT2;Q5SNT2-2	Q5SNT2;Q5SNT2-2	Transmembrane protein 201	TMEM201	1825
NaN	NaN	NaN	21.5398	NaN	21.3721	21.8042	21.7233	NaN	4	4	4	3.9	3.9	3.9	182.29	0	6.1904	53363000	8	Q5SRE5-2;Q5SRE5	Q5SRE5-2;Q5SRE5	Nucleoporin NUP188 homolog	NUP188	1826
27.0147	NaN	NaN	23.6755	NaN	25.9787	26.9566	21.2347	22.3689	18	18	18	34.5	34.5	34.5	61.206	0	286.55	1555900000	99	Q5SSJ5;Q5SSJ5-2;Q5SSJ5-3	Q5SSJ5;Q5SSJ5-2;Q5SSJ5-3	Heterochromatin protein 1-binding protein 3	HP1BP3	1827
NaN	NaN	NaN	NaN	NaN	NaN	NaN	NaN	NaN	1	1	1	6.5	6.5	6.5	32.648	0.0031646	1.7616	28695000	5	Q96L14;Q5SW79-2;Q5SW79-3;Q5SW79	Q96L14;Q5SW79-2;Q5SW79-3;Q5SW79	Cep170-like protein;Centrosomal protein of 170 kDa	CEP170P1;CEP170	1828
NaN	NaN	NaN	NaN	NaN	22.2673	NaN	NaN	NaN	2	2	2	6	6	6	79.322	0	2.9076	42348000	3	Q5SY16	Q5SY16	Polynucleotide 5-hydroxyl-kinase NOL9	NOL9	1829
NaN	22.8685	NaN	NaN	22.9991	21.5229	NaN	21.7701	NaN	4	4	4	15.6	15.6	15.6	59.371	0	11.228	82231000	10	Q5T0F9-3;Q5T0F9-2;Q5T0F9	Q5T0F9-3;Q5T0F9-2;Q5T0F9	Coiled-coil and C2 domain-containing protein 1B	CC2D1B	1830
NaN	NaN	NaN	NaN	NaN	NaN	NaN	17.2003	NaN	1	1	1	2.9	2.9	2.9	65.505	0.0011211	2.0801	6397900	2	Q5T160	Q5T160	Probable arginine--tRNA ligase, mitochondrial	RARS2	1831
NaN	NaN	NaN	NaN	NaN	NaN	NaN	NaN	NaN	1	1	1	18.5	18.5	18.5	15.512	0	33.934	133150000	21	Q9Y6H1;Q5T1J5	Q9Y6H1;Q5T1J5	Coiled-coil-helix-coiled-coil-helix domain-containing protein 2;Putative coiled-coil-helix-coiled-coil-helix domain-containing protein CHCHD2P9, mitochondrial	CHCHD2;CHCHD2P9	1832
NaN	NaN	NaN	NaN	NaN	NaN	NaN	NaN	NaN	1	1	1	5.9	5.9	5.9	50.329	0.0007657	2.262	56098000	4	Q5T1M5-3;Q5T1M5-2;Q5T1M5	Q5T1M5-3;Q5T1M5-2;Q5T1M5	FK506-binding protein 15	FKBP15	1833
NaN	NaN	NaN	NaN	NaN	NaN	NaN	22.4949	NaN	1	1	1	4.5	4.5	4.5	56.307	0	10.821	37341000	2	Q5T3F8-2;Q5T3F8-3;Q5T3F8	Q5T3F8-2;Q5T3F8-3;Q5T3F8	CSC1-like protein 2	TMEM63B	1834
NaN	NaN	NaN	NaN	NaN	NaN	NaN	NaN	NaN	1	1	1	3.1	3.1	3.1	50.381	0	3.2503	1812000	2	Q5T3I0;Q5T3I0-3	Q5T3I0;Q5T3I0-3	G patch domain-containing protein 4	GPATCH4	1835
NaN	NaN	NaN	22.2834	22.9593	NaN	22.0646	NaN	NaN	4	4	4	2.3	2.3	2.3	571.85	0	8.964	109770000	6	Q5T4S7-3;Q5T4S7-4;Q5T4S7;Q5T4S7-2;Q5T4S7-5	Q5T4S7-3;Q5T4S7-4;Q5T4S7;Q5T4S7-2;Q5T4S7-5	E3 ubiquitin-protein ligase UBR4	UBR4	1836
NaN	NaN	NaN	20.4356	NaN	20.5686	21.2427	NaN	NaN	3	3	3	5.4	5.4	5.4	117.11	0	6.2236	43498000	4	Q5T6F2;Q5T6F2-2	Q5T6F2	Ubiquitin-associated protein 2	UBAP2	1837
NaN	NaN	NaN	NaN	NaN	NaN	NaN	NaN	NaN	1	1	1	2.1	2.1	2.1	64.135	0	2.7724	5923600	1	Q5T749	Q5T749	Keratinocyte proline-rich protein	KPRP	1838
NaN	NaN	21.6155	21.828	NaN	21.5731	NaN	21.669	22.3194	3	3	3	11.8	11.8	11.8	46.268	0	4.7573	111230000	5	Q5T8D3-4;Q5T8D3-2;Q5T8D3-3;Q5T8D3	Q5T8D3-4;Q5T8D3-2;Q5T8D3-3;Q5T8D3	Acyl-CoA-binding domain-containing protein 5	ACBD5	1839
22.1947	22.7009	NaN	23.3091	22.6139	NaN	22.7801	23.4782	23.6784	10	10	10	37.6	37.6	37.6	51.844	0	40.056	265410000	25	Q5TFE4;Q5TFE4-2	Q5TFE4;Q5TFE4-2	5-nucleotidase domain-containing protein 1	NT5DC1	1841
NaN	NaN	NaN	NaN	NaN	NaN	NaN	20.2865	NaN	1	1	1	45.8	45.8	45.8	2.8092	0	11.062	8079100	2	Q5TGZ0-2;Q5TGZ0	Q5TGZ0-2;Q5TGZ0	MICOS complex subunit MIC10	MINOS1	1842
NaN	NaN	NaN	NaN	NaN	NaN	NaN	NaN	NaN	1	1	1	6.7	6.7	6.7	26.806	0	36.252	9675900	2	Q5UCC4-2;Q5UCC4	Q5UCC4-2;Q5UCC4	ER membrane protein complex subunit 10	EMC10	1843
NaN	NaN	NaN	NaN	NaN	NaN	NaN	NaN	21.6386	2	2	2	1.1	1.1	1.1	427.04	0.0028359	1.8101	46626000	3	Q5VST9-5;Q5VST9-3;Q5VST9;Q5VST9-2;Q5VST9-6	Q5VST9-5;Q5VST9-3;Q5VST9;Q5VST9-2;Q5VST9-6	Obscurin	OBSCN	1844
NaN	21.8361	NaN	23.0195	22.3322	22.09	21.7916	22.4437	22.2346	7	7	7	6.1	6.1	6.1	204.29	0	9.1211	160860000	10	Q5VYK3	Q5VYK3	Proteasome-associated protein ECM29 homolog	ECM29	1845
21.8375	22.0321	22.2732	23.4448	22.6803	21.4497	21.5993	23.5557	22.6799	4	4	4	61.9	61.9	61.9	13.087	0	28.501	207120000	22	Q5XKP0	Q5XKP0	Protein QIL1	QIL1	1846
21.5789	24.2809	NaN	21.8535	NaN	NaN	21.7621	25.1893	22.4792	2	2	2	8.9	8.9	8.9	52.761	0	235.76	349180000	17	Q5ZPR3-3;Q5ZPR3-4;Q5ZPR3	Q5ZPR3-3;Q5ZPR3-4;Q5ZPR3	CD276 antigen	CD276	1847
NaN	NaN	NaN	NaN	NaN	NaN	NaN	NaN	NaN	2	2	2	4	4	4	90.043	0.0025207	1.879	10500000	4	Q63ZY3-3;Q63ZY3;Q63ZY3-2	Q63ZY3-3;Q63ZY3;Q63ZY3-2	KN motif and ankyrin repeat domain-containing protein 2	KANK2	1848
NaN	NaN	NaN	NaN	20.6945	NaN	NaN	NaN	NaN	3	3	3	10.1	10.1	10.1	57.218	0.0038314	1.6905	17242000	3	Q643R3	Q643R3	Lysophospholipid acyltransferase LPCAT4	LPCAT4	1849
21.3006	22.4587	NaN	26.4088	26.165	24.3789	25.3309	28.5291	27.4041	18	18	18	31.4	31.4	31.4	54.471	0	213.98	4093500000	86	Q658P3-3;Q658P3;Q658P3-2;Q658P3-4	Q658P3-3;Q658P3;Q658P3-2;Q658P3-4	Metalloreductase STEAP3	STEAP3	1850
NaN	NaN	NaN	NaN	NaN	NaN	NaN	19.2454	NaN	1	1	1	2.6	2.6	2.6	138.67	0	3.8729	8550400	1	Q66K14-2;Q66K14	Q66K14-2;Q66K14	TBC1 domain family member 9B	TBC1D9B	1851
22.9349	NaN	NaN	21.1361	NaN	21.8092	22.3771	20.9492	NaN	1	1	1	7.5	7.5	7.5	25.348	0.0031858	1.8024	107040000	8	Q66PJ3-7;Q66PJ3-5;Q66PJ3-4;Q66PJ3-3;Q66PJ3-2;Q66PJ3	Q66PJ3-7;Q66PJ3-5;Q66PJ3-4;Q66PJ3-3;Q66PJ3-2;Q66PJ3	ADP-ribosylation factor-like protein 6-interacting protein 4	ARL6IP4	1852
NaN	NaN	NaN	NaN	NaN	20.4995	NaN	NaN	NaN	2	2	2	4.6	4.6	4.6	28.544	0	3.6009	14100000	5	Q68CQ7-2;Q68CQ7	Q68CQ7-2;Q68CQ7	Glycosyltransferase 8 domain-containing protein 1	GLT8D1	1853
NaN	NaN	NaN	NaN	NaN	NaN	NaN	NaN	NaN	1	1	1	1.9	1.9	1.9	120.18	0.00078864	2.5003	10382000	2	Q69YQ0-2;Q69YQ0	Q69YQ0-2;Q69YQ0	Cytospin-A	SPECC1L	1854
NaN	NaN	21.73	22.2809	21.9158	NaN	NaN	22.5993	22.1863	1	1	1	2.2	2.2	2.2	128.78	0	9.7964	106180000	6	Q6AI08	Q6AI08	HEAT repeat-containing protein 6	HEATR6	1855
NaN	22.023	22.3566	22.4662	22.5231	21.7905	NaN	22.9436	23.5798	5	5	5	16.1	16.1	16.1	60.541	0	38.129	240790000	18	Q6DD88	Q6DD88	Atlastin-3	ATL3	1856
24.6164	NaN	NaN	22.6481	NaN	25.1381	24.8945	21.0448	21.7452	8	8	8	26.3	26.3	26.3	29.669	0	23.848	536060000	37	Q6DKI1;Q6DKI1-2	Q6DKI1;Q6DKI1-2	60S ribosomal protein L7-like 1	RPL7L1	1857
24.1075	25.6428	24.7582	25.8791	25.3608	22.7924	22.3892	25.4314	23.5483	13	13	13	29.6	29.6	29.6	71.712	0	215.48	954020000	50	Q6EMK4	Q6EMK4	Vasorin	VASN	1858
NaN	NaN	NaN	NaN	NaN	26.5932	NaN	NaN	NaN	15	5	5	76.2	30.8	30.8	14.095	0	323.31	570600000	16	Q6FI13;Q16777	Q6FI13;Q16777	Histone H2A type 2-A;Histone H2A type 2-C	HIST2H2AA3;HIST2H2AC	1859
NaN	NaN	NaN	NaN	NaN	24.4542	NaN	NaN	NaN	2	2	2	14.2	14.2	14.2	23.743	0	5.6473	150830000	2	Q6I9Y2	Q6I9Y2	THO complex subunit 7 homolog	THOC7	1860
22.8036	23.0627	NaN	24.3224	23.0823	23.2368	NaN	23.1069	24.0637	8	8	8	68.9	68.9	68.9	17.745	0	80.602	395670000	25	Q6IAA8	Q6IAA8	Ragulator complex protein LAMTOR1	LAMTOR1	1861
NaN	NaN	NaN	NaN	NaN	NaN	NaN	NaN	20.024	1	1	1	4.9	4.9	4.9	35.119	0.0041754	1.682	32097000	2	Q6IAN0	Q6IAN0	Dehydrogenase/reductase SDR family member 7B	DHRS7B	1862
NaN	22.018	NaN	NaN	NaN	NaN	NaN	22.5537	NaN	2	2	2	5.7	5.7	5.7	27.248	0	9.1366	52577000	4	Q6IQ22	Q6IQ22	Ras-related protein Rab-12	RAB12	1863
NaN	NaN	NaN	21.8806	NaN	NaN	NaN	23.0068	22.7186	3	3	3	7.9	7.9	7.9	90.246	0	12.276	120460000	6	Q6NSJ5	Q6NSJ5	Volume-regulated anion channel subunit LRRC8E	LRRC8E	1864
NaN	NaN	NaN	NaN	NaN	NaN	NaN	NaN	NaN	1	1	1	15.2	15.2	15.2	23.686	0	15.891	118430000	3	Q6NTF9-3;Q6NTF9;Q6NTF9-2	Q6NTF9-3;Q6NTF9;Q6NTF9-2	Rhomboid domain-containing protein 2	RHBDD2	1865
23.0499	23.5563	24.4965	24.8354	24.2981	23.9308	21.9438	23.217	21.6847	9	9	9	26.4	26.4	26.4	51.354	0	44.262	381920000	27	Q6NUK1-2;Q6NUK1	Q6NUK1-2;Q6NUK1	Calcium-binding mitochondrial carrier protein SCaMC-1	SLC25A24	1866
NaN	NaN	NaN	NaN	NaN	NaN	NaN	NaN	NaN	2	2	2	14.9	14.9	14.9	29.264	0	3.5416	154950000	2	Q6NUK4;Q6NUK4-2	Q6NUK4;Q6NUK4-2	Receptor expression-enhancing protein 3	REEP3	1867
22.3214	24.2271	24.5685	23.1989	23.3683	22.908	23.0666	24.1461	23.1232	7	7	7	14.9	14.9	14.9	72.039	0	50.718	369390000	29	Q6NUQ4-2;Q6NUQ4	Q6NUQ4-2;Q6NUQ4	Transmembrane protein 214	TMEM214	1868
NaN	NaN	NaN	NaN	NaN	NaN	NaN	NaN	21.1566	2	2	2	2.6	2.6	2.6	102.16	0	12.117	496560000	12	Q6NV74	Q6NV74	Uncharacterized protein KIAA1211-like	KIAA1211L	1869
NaN	NaN	NaN	NaN	NaN	NaN	NaN	23.0809	NaN	3	3	3	10.8	10.8	10.8	47.546	0	6.2414	57258000	5	Q6NW40	Q6NW40	RGM domain family member B	RGMB	1870
NaN	NaN	NaN	21.1938	NaN	NaN	NaN	NaN	NaN	2	2	2	13.4	13.4	13.4	51.547	0	6.2195	25152000	4	Q6NXE6-2;Q6NXE6	Q6NXE6-2;Q6NXE6	Armadillo repeat-containing protein 6	ARMC6	1871
22.2535	23.7174	NaN	21.2845	22.5816	21.5227	23.1126	23.2839	NaN	7	7	7	18.9	18.9	18.9	67.942	0	36.952	241510000	26	Q6NYC8;Q6NYC8-2;Q6NYC8-3	Q6NYC8;Q6NYC8-2	Phostensin	PPP1R18	1872
25.1909	25.9719	24.9633	24.1923	25.4482	26.528	26.5875	25.998	23.2055	12	12	12	30.3	30.3	30.3	43.476	0	83.261	2796300000	122	Q6NZI2;Q6NZI2-2;Q6NZI2-3	Q6NZI2	Polymerase I and transcript release factor	PTRF	1873
NaN	NaN	NaN	NaN	NaN	20.6509	NaN	NaN	NaN	2	2	2	10.4	10.4	10.4	51.129	0	13.332	15903000	4	Q6NZY4-2;Q6NZY4	Q6NZY4-2;Q6NZY4	Zinc finger CCHC domain-containing protein 8	ZCCHC8	1874
21.1853	NaN	NaN	NaN	NaN	NaN	22.9032	NaN	NaN	4	4	4	31	31	31	15.947	0	6.9236	39755000	10	Q6P1L8	Q6P1L8	39S ribosomal protein L14, mitochondrial	MRPL14	1875
20.8598	20.6167	NaN	21.3416	21.2385	20.7998	NaN	21.2144	22.1472	4	4	4	10.3	10.3	10.3	72.063	0	7.656	101250000	8	Q6P1M0;Q6P1M0-2	Q6P1M0;Q6P1M0-2	Long-chain fatty acid transport protein 4	SLC27A4	1876
NaN	20.9429	NaN	NaN	21.2662	NaN	NaN	NaN	NaN	3	3	3	5.1	5.1	5.1	103.93	0	3.0392	56663000	8	Q6P1N0-2;Q6P1N0	Q6P1N0-2;Q6P1N0	Coiled-coil and C2 domain-containing protein 1A	CC2D1A	1877
NaN	NaN	NaN	20.5516	NaN	NaN	NaN	NaN	21.2274	2	2	2	10.1	10.1	10.1	43.426	0	4.5447	21984000	3	Q6P1Q9;Q96IZ6	Q6P1Q9;Q96IZ6	Methyltransferase-like protein 2B;Methyltransferase-like protein 2A	METTL2B;METTL2A	1878
NaN	NaN	NaN	NaN	NaN	19.5978	NaN	19.6605	NaN	3	3	3	15.4	15.4	15.4	22.808	0	4.263	16745000	4	Q6P1X6-2;Q6P1X6	Q6P1X6-2;Q6P1X6	UPF0598 protein C8orf82	C8orf82	1879
22.1587	23.1818	NaN	22.2683	NaN	22.6417	23.7494	23.092	22.0621	10	10	10	17.4	17.4	17.4	109.73	0	24.928	319720000	33	Q6P2E9-2;Q6P2E9	Q6P2E9-2;Q6P2E9	Enhancer of mRNA-decapping protein 4	EDC4	1880
25.2335	NaN	NaN	23.3415	NaN	27.353	26.3161	21.7207	23.7191	31	31	31	19.8	19.8	19.8	273.6	0	323.31	1372100000	93	Q6P2Q9	Q6P2Q9	Pre-mRNA-processing-splicing factor 8	PRPF8	1881
NaN	NaN	NaN	NaN	NaN	NaN	NaN	20.7317	21.564	3	1	1	28.7	21.3	21.3	14.606	0	6.3924	37492000	3	Q6P5R6	Q6P5R6	60S ribosomal protein L22-like 1	RPL22L1	1882
NaN	NaN	NaN	24.9394	24.0805	22.2584	23.5754	25.8583	24.8154	9	9	9	19.7	19.7	19.7	83.571	0	108.22	915260000	36	Q6P996-4;Q6P996-5;Q6P996;Q6P996-3;Q6P996-2;Q6P474	Q6P996-4;Q6P996-5;Q6P996;Q6P996-3	Pyridoxal-dependent decarboxylase domain-containing protein 1	PDXDC1	1883
NaN	NaN	NaN	23.3828	NaN	21.7982	22.0052	23.4387	23.5182	7	7	7	26.8	26.8	26.8	50.993	0	39.981	320900000	28	Q6P9B6	Q6P9B6	TLD domain-containing protein 1	TLDC1	1884
23.3277	23.8596	24.6358	23.7789	22.7881	21.5703	24.1986	23.9996	24.612	5	5	5	15.9	15.9	15.9	46.626	0	51.611	426600000	31	Q6PIU2-2;Q6PIU2;Q6PIU2-3	Q6PIU2-2;Q6PIU2;Q6PIU2-3	Neutral cholesterol ester hydrolase 1	NCEH1	1885
NaN	NaN	NaN	22.2981	21.8476	NaN	NaN	22.023	21.3613	2	2	2	3.6	3.6	3.6	93.378	0	5.6823	74856000	4	Q6PJF5-2;Q6PJF5	Q6PJF5-2;Q6PJF5	Inactive rhomboid protein 2	RHBDF2	1886
21.1043	NaN	NaN	NaN	NaN	22.6533	21.4132	NaN	NaN	4	4	4	10.3	10.3	10.3	80.02	0	7.4044	48317000	6	Q6PJT7-5;Q6PJT7;Q6PJT7-10;Q6PJT7-4;Q6PJT7-9;Q6PJT7-2;Q6PJT7-3;Q6PJT7-11;Q6PJT7-8	Q6PJT7-5;Q6PJT7;Q6PJT7-10;Q6PJT7-4;Q6PJT7-9;Q6PJT7-2;Q6PJT7-3;Q6PJT7-11	Zinc finger CCCH domain-containing protein 14	ZC3H14	1887
22.4715	23.0006	23.076	24.1174	23.3229	22.6865	22.6756	23.9821	NaN	2	2	2	8.5	8.5	8.5	35.646	0	3.7621	335480000	14	Q6PK18;Q6PK18-2	Q6PK18;Q6PK18-2	2-oxoglutarate and iron-dependent oxygenase domain-containing protein 3	OGFOD3	1888
NaN	20.9259	NaN	21.0915	20.7832	21.8307	22.4289	21.1647	21.506	3	3	3	4.8	4.8	4.8	123.51	0	11.042	83923000	9	Q6PKG0;Q6PKG0-3	Q6PKG0	La-related protein 1	LARP1	1889
NaN	NaN	NaN	NaN	NaN	NaN	NaN	NaN	19.1656	1	1	1	3.1	3.1	3.1	35.74	0.0007728	2.3343	3731600	1	Q6PL24	Q6PL24	Protein TMED8	TMED8	1890
NaN	NaN	NaN	NaN	NaN	NaN	20.4633	NaN	NaN	2	2	2	3.3	3.3	3.3	63.514	0	10.463	37940000	5	Q6PML9	Q6PML9	Zinc transporter 9	SLC30A9	1891
NaN	NaN	NaN	NaN	NaN	NaN	NaN	NaN	NaN	1	1	1	7.9	7.9	7.9	21.255	0.0064957	1.5653	17341000	1	Q6QNY0	Q6QNY0	Biogenesis of lysosome-related organelles complex 1 subunit 3	BLOC1S3	1892
NaN	NaN	NaN	NaN	NaN	NaN	21.1203	NaN	NaN	2	2	2	4.1	4.1	4.1	40.207	0	6.008	32317000	9	Q6RFH5-2;Q6RFH5	Q6RFH5-2;Q6RFH5	WD repeat-containing protein 74	WDR74	1893
NaN	NaN	NaN	NaN	NaN	NaN	NaN	NaN	21.283	1	1	1	14.5	14.5	14.5	16.669	0	19.85	54569000	7	Q6RW13-2;Q6RW13	Q6RW13-2;Q6RW13	Type-1 angiotensin II receptor-associated protein	AGTRAP	1894
NaN	NaN	NaN	NaN	NaN	NaN	NaN	20.2917	NaN	1	1	1	2.2	2.2	2.2	79.387	0.00075729	2.1633	20051000	3	Q6SZW1	Q6SZW1	Sterile alpha and TIR motif-containing protein 1	SARM1	1895
NaN	NaN	NaN	NaN	NaN	NaN	NaN	17.7147	NaN	2	1	1	2.9	1.8	1.8	105.79	0.0031735	1.7885	2818400	1	Q6UB35	Q6UB35	Monofunctional C1-tetrahydrofolate synthase, mitochondrial	MTHFD1L	1896
23.6766	NaN	NaN	NaN	NaN	22.2268	NaN	NaN	NaN	3	3	3	12.9	12.9	12.9	58.375	0	10.715	110280000	6	Q6UN15-3;Q6UN15-4;Q6UN15-5;Q6UN15	Q6UN15-3;Q6UN15-4;Q6UN15-5;Q6UN15	Pre-mRNA 3-end-processing factor FIP1	FIP1L1	1897
27.8187	27.2234	26.6672	27.9387	28.405	26.1201	26.7995	28.1401	28.0361	61	61	61	34.6	34.6	34.6	250.53	0	323.31	6435300000	354	Q6UVK1	Q6UVK1	Chondroitin sulfate proteoglycan 4	CSPG4	1898
NaN	21.7071	NaN	NaN	21.1661	NaN	NaN	25.9906	21.9717	6	6	6	16.8	16.8	16.8	69.652	0	240.87	444140000	17	Q6UVY6;Q6UVY6-2	Q6UVY6;Q6UVY6-2	DBH-like monooxygenase protein 1	MOXD1	1899
NaN	23.9446	24.5022	23.4109	24.1669	23.4761	22.9286	24.8702	25.2659	3	3	3	18.5	18.5	18.5	21.198	0	12.984	713270000	21	Q6UW68	Q6UW68	Transmembrane protein 205	TMEM205	1900
NaN	NaN	NaN	NaN	NaN	NaN	NaN	NaN	NaN	1	1	1	4.1	4.1	4.1	46.844	0.0074349	1.4897	15209000	2	Q6UWJ1-3;Q6UWJ1-2;Q6UWJ1	Q6UWJ1-3;Q6UWJ1-2;Q6UWJ1	Transmembrane and coiled-coil domain-containing protein 3	TMCO3	1901
NaN	NaN	NaN	NaN	NaN	NaN	NaN	NaN	19.8703	1	1	1	3.9	3.9	3.9	36.044	0.00075815	2.1753	31094000	2	Q6UWP7-2;Q6UWP7-3;Q6UWP7	Q6UWP7-2;Q6UWP7-3;Q6UWP7	Lysocardiolipin acyltransferase 1	LCLAT1	1902
NaN	NaN	NaN	23.1757	NaN	NaN	NaN	22.4716	NaN	3	3	3	13.4	13.4	13.4	43.108	0	4.5109	72295000	3	Q6UX15;Q6UX15-2;Q6UX15-3	Q6UX15;Q6UX15-2;Q6UX15-3	Layilin	LAYN	1903
NaN	NaN	NaN	NaN	NaN	NaN	21.8614	22.4746	21.9682	5	5	5	24.2	24.2	24.2	27.775	0	6.4886	83534000	6	Q6UX53	Q6UX53	Methyltransferase-like protein 7B	METTL7B	1904
NaN	NaN	NaN	22.3663	21.9709	NaN	NaN	23.0503	22.4039	5	5	5	11.4	11.4	11.4	90.881	0	14.877	146000000	11	Q6UXD5-2;Q6UXD5-3;Q6UXD5-5;Q6UXD5;Q6UXD5-6;Q6UXD5-4	Q6UXD5-2;Q6UXD5-3;Q6UXD5-5;Q6UXD5;Q6UXD5-6;Q6UXD5-4	Seizure 6-like protein 2	SEZ6L2	1905
NaN	NaN	NaN	NaN	NaN	NaN	NaN	NaN	NaN	1	1	1	7.3	7.3	7.3	35.079	0	10.041	21812000	3	Q6UXN9	Q6UXN9	WD repeat-containing protein 82	WDR82	1906
22.6355	23.0261	22.5552	24.1328	23.8552	22.687	22.5082	23.9869	24.015	5	5	5	33.2	33.2	33.2	29.159	0	12.489	400690000	17	Q6UXV4	Q6UXV4	MICOS complex subunit MIC27	APOOL	1907
NaN	NaN	NaN	NaN	NaN	NaN	NaN	NaN	NaN	1	1	1	2.4	2.4	2.4	64.541	0.0007619	2.1973	7954700	2	Q6VN20-3;Q6VN20	Q6VN20-3;Q6VN20	Ran-binding protein 10	RANBP10	1908
22.025	NaN	NaN	22.6379	NaN	25.5275	21.5737	22.3355	20.7051	12	12	12	19.1	19.1	19.1	118.1	0	72.719	742870000	25	Q6WCQ1-2;Q6WCQ1;Q6WCQ1-3	Q6WCQ1-2;Q6WCQ1;Q6WCQ1-3	Myosin phosphatase Rho-interacting protein	MPRIP	1909
NaN	NaN	NaN	NaN	NaN	NaN	NaN	NaN	20.7465	2	2	2	2	2	2	148.63	0	3.0641	18508000	1	Q6Y7W6-4;Q6Y7W6-5;Q6Y7W6;Q6Y7W6-3	Q6Y7W6-4;Q6Y7W6-5;Q6Y7W6;Q6Y7W6-3	PERQ amino acid-rich with GYF domain-containing protein 2	GIGYF2	1910
23.6677	24.7367	24.7982	25.314	23.7707	22.0651	22.391	24.555	23.9027	10	10	10	11.4	11.4	11.4	159.69	0	287.82	588650000	36	Q6YHK3-4;Q6YHK3;Q6YHK3-2;Q6YHK3-3	Q6YHK3-4;Q6YHK3;Q6YHK3-2	CD109 antigen	CD109	1911
23.0817	23.7792	NaN	24.1681	23.3073	23.5863	23.4707	23.5678	24.1037	4	4	4	17.9	17.9	17.9	45.394	0	73.477	418740000	24	Q6YN16;Q6YN16-2	Q6YN16;Q6YN16-2	Hydroxysteroid dehydrogenase-like protein 2	HSDL2	1912
NaN	NaN	NaN	NaN	NaN	NaN	NaN	22.7277	21.7322	3	3	3	14.6	14.6	14.6	35.652	0	7.4691	75048000	10	Q6ZMC9;Q6ZMC9-2	Q6ZMC9;Q6ZMC9-2	Sialic acid-binding Ig-like lectin 15	SIGLEC15	1913
NaN	NaN	NaN	NaN	NaN	20.4913	NaN	NaN	NaN	2	2	2	9.6	9.6	9.6	42.132	0	3.3226	7504700	1	Q6ZMI0-4;Q6ZMI0-3;Q6ZMI0-5;Q6ZMI0-2;Q6ZMI0	Q6ZMI0-4;Q6ZMI0-3;Q6ZMI0-5;Q6ZMI0-2;Q6ZMI0	Protein phosphatase 1 regulatory subunit 21	PPP1R21	1914
NaN	NaN	NaN	NaN	NaN	NaN	NaN	NaN	NaN	3	3	3	9.9	9.9	9.9	56.627	0	5.0216	28154000	4	Q6ZMP0-2;Q6ZMP0	Q6ZMP0-2;Q6ZMP0	Thrombospondin type-1 domain-containing protein 4	THSD4	1915
NaN	NaN	NaN	NaN	NaN	NaN	NaN	21.1136	NaN	1	1	1	3.2	3.2	3.2	66.114	0	5.0747	14333000	1	Q6ZNA5;Q6ZNA5-2	Q6ZNA5;Q6ZNA5-2	Ferric-chelate reductase 1	FRRS1	1916
NaN	NaN	NaN	NaN	NaN	NaN	NaN	NaN	22.8211	2	2	2	11.8	11.8	11.8	24.486	0	81.98	319440000	8	Q6ZUX7	Q6ZUX7	Lipoma HMGIC fusion partner-like 2 protein	LHFPL2	1917
NaN	NaN	NaN	NaN	NaN	NaN	NaN	21.7565	20.8576	2	2	2	1.9	1.9	1.9	199	0	5.6829	34441000	3	Q6ZVL6;Q6ZVL6-2	Q6ZVL6;Q6ZVL6-2	UPF0606 protein KIAA1549L	KIAA1549L	1918
NaN	NaN	NaN	NaN	NaN	NaN	NaN	NaN	20.5256	1	1	1	2.8	2.8	2.8	49.963	0.00075672	2.1627	29294000	2	Q6ZVM7-2;Q6ZVM7	Q6ZVM7-2;Q6ZVM7	TOM1-like protein 2	TOM1L2	1919
NaN	NaN	NaN	NaN	NaN	NaN	NaN	NaN	18.7554	1	1	1	5.8	5.8	5.8	59.526	0.00039777	2.5674	9280600	2	Q6ZWT7	Q6ZWT7	Lysophospholipid acyltransferase 2	MBOAT2	1920
NaN	NaN	NaN	NaN	NaN	20.1946	NaN	NaN	NaN	2	2	2	3.1	3.1	3.1	103.88	0	2.8011	26749000	3	Q6ZXV5-2;Q6ZXV5	Q6ZXV5-2;Q6ZXV5	Transmembrane and TPR repeat-containing protein 3	TMTC3	1921
NaN	NaN	NaN	NaN	NaN	NaN	NaN	NaN	NaN	2	2	2	5.1	5.1	5.1	66.949	0.0028725	1.8664	14547000	2	Q70E73-5;Q70E73-2;Q70E73-8;Q70E73-7;Q70E73-4;Q70E73-3;Q70E73-9;Q70E73-6;Q70E73	Q70E73-5;Q70E73-2;Q70E73-8;Q70E73-7;Q70E73-4;Q70E73-3;Q70E73-9;Q70E73-6;Q70E73	Ras-associated and pleckstrin homology domains-containing protein 1	RAPH1	1922
NaN	22.5037	NaN	22.2704	22.2577	23.6694	NaN	NaN	NaN	7	7	5	18	18	12	39.309	0	10.314	135620000	11	Q70UQ0;Q70UQ0-2	Q70UQ0;Q70UQ0-2	Inhibitor of nuclear factor kappa-B kinase-interacting protein	IKBIP	1923
NaN	NaN	NaN	NaN	NaN	NaN	NaN	NaN	NaN	5	3	3	17.5	11.9	11.9	43.083	0	3.6689	40635000	5	Q70UQ0-4	Q70UQ0-4	Inhibitor of nuclear factor kappa-B kinase-interacting protein	IKBIP	1924
NaN	NaN	NaN	NaN	NaN	NaN	NaN	NaN	NaN	2	2	2	5.3	5.3	5.3	67.279	0	3.0471	17410000	3	Q71RC2-2;Q71RC2-5;Q71RC2-3;Q71RC2;Q71RC2-4;Q71RC2-7;Q71RC2-6	Q71RC2-2;Q71RC2-5;Q71RC2-3;Q71RC2;Q71RC2-4;Q71RC2-7;Q71RC2-6	La-related protein 4	LARP4	1925
NaN	23.7533	NaN	23.5603	23.3232	22.5863	NaN	22.435	22.4672	41	5	0	72.5	10.9	0	50.135	0	185.74	673530000	60	Q71U36;Q71U36-2	Q71U36;Q71U36-2	Tubulin alpha-1A chain	TUBA1A	1926
NaN	21.8989	NaN	NaN	NaN	NaN	NaN	NaN	NaN	4	4	4	6.2	6.2	6.2	108.17	0	2.6136	252590000	4	Q76M96;Q76M96-2	Q76M96;Q76M96-2	Coiled-coil domain-containing protein 80	CCDC80	1927
23.898	24.3331	24.6793	25.3022	23.9875	21.5133	23.4763	26.4071	24.7828	12	12	12	36.5	36.5	36.5	53.203	0	68.868	1048500000	54	Q7KYR7-5;Q7KYR7;Q7KYR7-1;Q7KYR7-3;Q7KYR7-6;Q7KYR7-4;Q8WVV5-3;Q8WVV5-2;Q8WVV5	Q7KYR7-5;Q7KYR7;Q7KYR7-1;Q7KYR7-3;Q7KYR7-6;Q7KYR7-4	Butyrophilin subfamily 2 member A1	BTN2A1	1928
NaN	NaN	NaN	NaN	NaN	NaN	NaN	NaN	19.4245	1	1	1	3.4	3.4	3.4	84.631	0	8.8284	4465200	1	Q7KZ85-3;Q7KZ85	Q7KZ85-3;Q7KZ85	Transcription elongation factor SPT6	SUPT6H	1929
25.7453	25.945	24.5856	27.2747	25.1884	26.4255	26.854	25.5824	27.0844	43	43	43	62.4	62.4	62.4	102	0	323.31	3317700000	202	Q7KZF4	Q7KZF4	Staphylococcal nuclease domain-containing protein 1	SND1	1930
NaN	NaN	NaN	21.2062	NaN	22.5142	20.8873	20.4311	21.9587	5	5	5	8.1	8.1	8.1	117.36	0	16.376	81621000	7	Q7L014	Q7L014	Probable ATP-dependent RNA helicase DDX46	DDX46	1931
NaN	NaN	NaN	NaN	NaN	NaN	NaN	NaN	21.0624	1	1	1	4.3	4.3	4.3	76.618	0	3.2485	59124000	2	Q7L0J3-2;Q7L0J3	Q7L0J3-2;Q7L0J3	Synaptic vesicle glycoprotein 2A	SV2A	1932
NaN	NaN	NaN	NaN	NaN	21.9946	NaN	NaN	NaN	3	3	3	12.9	12.9	12.9	47.346	0	3.3844	44487000	3	Q7L0Y3	Q7L0Y3	Mitochondrial ribonuclease P protein 1	TRMT10C	1933
NaN	NaN	NaN	NaN	NaN	NaN	NaN	NaN	21.6246	1	1	1	3.7	3.7	3.7	40.538	0	3.6862	46256000	1	Q7L1Q6-2;Q7L1Q6;Q7L1Q6-4;Q7L1Q6-3	Q7L1Q6-2;Q7L1Q6;Q7L1Q6-4;Q7L1Q6-3	Basic leucine zipper and W2 domain-containing protein 1	BZW1	1934
NaN	21.5467	NaN	NaN	NaN	25.7853	20.604	20.9599	20.5367	15	15	15	17.7	17.7	17.7	129.44	0	105.52	356310000	27	Q7L2E3-3;Q7L2E3;Q7L2E3-2	Q7L2E3-3;Q7L2E3;Q7L2E3-2	Putative ATP-dependent RNA helicase DHX30	DHX30	1935
NaN	NaN	NaN	22.315	NaN	NaN	NaN	NaN	NaN	2	2	2	5.9	5.9	5.9	42.502	0	17.589	23873000	4	Q7L2H7	Q7L2H7	Eukaryotic translation initiation factor 3 subunit M	EIF3M	1936
20.4977	NaN	NaN	NaN	20.3489	NaN	20.151	20.5604	21.7855	2	2	2	6	6	6	44.878	0.000757	2.1628	45422000	3	Q7L4I2-2;Q7L4I2	Q7L4I2-2;Q7L4I2	Arginine/serine-rich coiled-coil protein 2	RSRC2	1937
21.9668	21.4321	NaN	22.8588	NaN	22.3934	22.3654	22.0601	22.2823	6	6	6	5.3	5.3	5.3	145.18	0	9.4481	226450000	15	Q7L576;Q96F07-2;Q7L576-3;Q7L576-2;Q96F07	Q7L576;Q96F07-2;Q7L576-3;Q7L576-2;Q96F07	Cytoplasmic FMR1-interacting protein 1;Cytoplasmic FMR1-interacting protein 2	CYFIP1;CYFIP2	1938
NaN	NaN	NaN	NaN	NaN	NaN	NaN	NaN	19.5623	1	1	1	4	4	4	36.504	0	3.4733	13671000	2	Q7L5D6	Q7L5D6	Golgi to ER traffic protein 4 homolog	GET4	1939
NaN	NaN	NaN	NaN	NaN	19.662	NaN	NaN	NaN	1	1	1	4.1	4.1	4.1	84.711	0.00077399	2.339	9663400	2	Q7LBC6-3;Q7LBC6-2;Q7LBC6	Q7LBC6-3;Q7LBC6-2;Q7LBC6	Lysine-specific demethylase 3B	KDM3B	1940
NaN	NaN	NaN	NaN	NaN	NaN	NaN	NaN	NaN	1	1	1	4.4	4.4	4.4	26.757	0.0090726	1.4605	18825000	2	Q7LGA3-3;Q7LGA3-2;Q7LGA3	Q7LGA3-3;Q7LGA3-2;Q7LGA3	Heparan sulfate 2-O-sulfotransferase 1	HS2ST1	1941
NaN	NaN	NaN	19.0338	NaN	NaN	NaN	NaN	NaN	1	1	1	5.8	5.8	5.8	24.856	0.00076453	2.244	2236500	1	Q7RTV5	Q7RTV5	Thioredoxin-like protein AAED1	AAED1	1942
22.0855	21.6137	NaN	21.7	21.4471	21.0926	21.506	21.5806	21.3101	3	3	3	8.8	8.8	8.8	67.589	0	10.355	104960000	14	Q7Z2W4-3;Q7Z2W4-2;Q7Z2W4	Q7Z2W4-3;Q7Z2W4-2;Q7Z2W4	Zinc finger CCCH-type antiviral protein 1	ZC3HAV1	1943
NaN	NaN	NaN	NaN	NaN	NaN	NaN	NaN	18.7246	1	1	1	1.9	1.9	1.9	119.89	0.0014583	1.9659	2748700	1	Q7Z2Z2-2;Q7Z2Z2	Q7Z2Z2-2;Q7Z2Z2	Elongation factor Tu GTP-binding domain-containing protein 1	EFTUD1	1944
NaN	NaN	NaN	22.373	22.2902	NaN	NaN	22.4428	NaN	3	3	3	8.2	8.2	8.2	87.378	0	64.127	91528000	7	Q7Z3C6-2;Q7Z3C6	Q7Z3C6-2;Q7Z3C6	Autophagy-related protein 9A	ATG9A	1945
NaN	NaN	NaN	NaN	NaN	NaN	NaN	19.2565	NaN	1	1	1	0.8	0.8	0.8	109.56	0.00076775	2.2775	11614000	1	Q7Z3J2	Q7Z3J2	UPF0505 protein C16orf62	C16orf62	1946
NaN	NaN	NaN	NaN	NaN	NaN	NaN	NaN	NaN	2	1	1	1.9	0.8	0.8	167.89	0.00744	1.4902	18577000	2	Q7Z406-5;Q7Z406-4;Q7Z406;Q7Z406-6;Q7Z406-2	Q7Z406-5;Q7Z406-4;Q7Z406;Q7Z406-6;Q7Z406-2	Myosin-14	MYH14	1947
NaN	NaN	NaN	NaN	NaN	NaN	NaN	NaN	NaN	2	2	2	7.1	7.1	7.1	76.12	0	4.2225	12708000	2	Q7Z417	Q7Z417	Nuclear fragile X mental retardation-interacting protein 2	NUFIP2	1948
NaN	NaN	NaN	23.8089	NaN	22.1774	NaN	22.7112	22.7468	5	5	5	29.6	29.6	29.6	56.527	0	12.188	206470000	12	Q7Z434;Q7Z434-4	Q7Z434;Q7Z434-4	Mitochondrial antiviral-signaling protein	MAVS	1949
22.0551	22.5797	22.4869	21.0254	21.7168	NaN	21.4685	21.7804	21.1647	3	3	3	7.3	7.3	7.3	76.193	0	5.956	89854000	12	Q7Z4F1;Q7Z4F1-2	Q7Z4F1	Low-density lipoprotein receptor-related protein 10	LRP10	1950
NaN	NaN	NaN	NaN	NaN	NaN	NaN	NaN	22.0586	2	2	2	6.7	6.7	6.7	58.572	0	41.8	30443000	4	Q7Z4H8;Q7Z4H8-3;Q7Z4H8-2	Q7Z4H8;Q7Z4H8-3;Q7Z4H8-2	KDEL motif-containing protein 2	KDELC2	1951
NaN	NaN	NaN	20.6461	NaN	NaN	NaN	20.0257	20.4434	2	2	2	4	4	4	74.582	0	2.8659	25421000	3	Q7Z4Q2	Q7Z4Q2	HEAT repeat-containing protein 3	HEATR3	1952
NaN	NaN	NaN	NaN	NaN	NaN	NaN	NaN	19.506	1	1	1	14.1	14.1	14.1	20.772	0	4.8668	12282000	2	Q7Z4R8	Q7Z4R8	UPF0669 protein C6orf120	C6orf120	1953
NaN	NaN	NaN	NaN	NaN	NaN	NaN	NaN	NaN	1	1	1	1.9	1.9	1.9	74.229	0.0035014	1.7283	32438000	3	Q7Z4V5-2;Q7Z4V5;Q7Z4V5-4;Q7Z4V5-3	Q7Z4V5-2;Q7Z4V5;Q7Z4V5-4;Q7Z4V5-3	Hepatoma-derived growth factor-related protein 2	HDGFRP2	1954
NaN	NaN	NaN	NaN	NaN	NaN	NaN	NaN	NaN	1	1	1	1.3	1.3	1.3	175.34	0.0074375	1.49	2734100	1	Q7Z5J4-3;Q7Z5J4-2;Q7Z5J4	Q7Z5J4-3;Q7Z5J4-2;Q7Z5J4	Retinoic acid-induced protein 1	RAI1	1955
NaN	NaN	NaN	NaN	NaN	NaN	NaN	NaN	19.9843	1	1	1	4.1	4.1	4.1	63.244	0	2.8698	6581500	1	Q7Z6J6-2;Q7Z6J6	Q7Z6J6-2;Q7Z6J6	FERM domain-containing protein 5	FRMD5	1956
NaN	NaN	NaN	NaN	NaN	NaN	NaN	NaN	NaN	1	1	1	4.7	4.7	4.7	34.841	0	3.891	0	1	Q7Z6M1-2;Q7Z6M1	Q7Z6M1-2;Q7Z6M1	Rab9 effector protein with kelch motifs	RABEPK	1957
20.4905	NaN	NaN	20.9584	NaN	NaN	20.7524	NaN	21.6245	3	3	3	1.5	1.5	1.5	480.19	0	15.336	42804000	5	Q7Z6Z7-2;Q7Z6Z7-3;Q7Z6Z7	Q7Z6Z7-2;Q7Z6Z7-3;Q7Z6Z7	E3 ubiquitin-protein ligase HUWE1	HUWE1	1958
NaN	NaN	NaN	NaN	NaN	NaN	NaN	NaN	NaN	1	1	1	9.4	9.4	9.4	12.49	0.00039604	2.5288	78660000	7	Q7Z7K0	Q7Z7K0	COX assembly mitochondrial protein homolog	CMC1	1959
23.338	NaN	NaN	NaN	NaN	NaN	NaN	NaN	NaN	3	3	3	15.1	15.1	15.1	29.73	0	59.612	23274000	8	Q7Z7K6-3;Q7Z7K6-2;Q7Z7K6	Q7Z7K6-3	Centromere protein V	CENPV	1960
NaN	NaN	NaN	22.8423	NaN	NaN	NaN	NaN	NaN	3	3	3	8.2	8.2	8.2	57.933	0	5.3033	31336000	3	Q86SJ2	Q86SJ2	Amphoterin-induced protein 2	AMIGO2	1961
NaN	NaN	NaN	NaN	NaN	NaN	NaN	NaN	NaN	3	3	3	4.8	4.8	4.8	113.82	0	25.14	54925000	5	Q86SJ6;Q86SJ6-2	Q86SJ6;Q86SJ6-2	Desmoglein-4	DSG4	1962
NaN	NaN	NaN	NaN	NaN	NaN	NaN	NaN	NaN	1	1	1	1	1	1	136.88	0.004171	1.6752	10999000	1	Q86SQ0-2;Q86SQ0-3;Q86SQ0	Q86SQ0-2;Q86SQ0-3;Q86SQ0	Pleckstrin homology-like domain family B member 2	PHLDB2	1963
NaN	NaN	NaN	22.0183	NaN	NaN	22.4276	NaN	21.866	2	2	2	6	6	6	79.907	0.00039857	2.5747	62576000	7	Q86TB9-4;Q86TB9	Q86TB9-4;Q86TB9	Protein PAT1 homolog 1	PATL1	1964
23.6315	NaN	NaN	21.9033	NaN	24.0951	24.3538	22.7905	NaN	4	4	4	26.1	26.1	26.1	32.749	0	323.31	239860000	22	Q86U42;Q86U42-2;Q92843-2	Q86U42;Q86U42-2	Polyadenylate-binding protein 2	PABPN1	1965
23.3415	22.5906	22.2234	23.1114	22.9935	25.1122	24.333	23.8061	23.7174	5	5	5	15.6	15.6	15.6	63.836	0	16.557	607820000	30	Q86UE4	Q86UE4	Protein LYRIC	MTDH	1966
NaN	NaN	NaN	NaN	NaN	NaN	NaN	NaN	21.015	2	2	2	6.4	6.4	6.4	52.07	0	2.7839	30196000	4	Q86UL3	Q86UL3	Glycerol-3-phosphate acyltransferase 4	AGPAT6	1967
21.8792	NaN	NaN	21.1246	NaN	23.0457	23.2717	NaN	21.8183	7	7	7	9.3	9.3	9.3	149.61	0	9.1637	153490000	11	Q86UP2-2;Q86UP2-3;Q86UP2-4;Q86UP2	Q86UP2-2;Q86UP2-3;Q86UP2-4;Q86UP2	Kinectin	KTN1	1968
NaN	NaN	NaN	20.0896	NaN	NaN	NaN	NaN	NaN	1	1	1	1.4	1.4	1.4	101.87	0.0031657	1.7636	5730100	1	Q86UT6-2;Q86UT6	Q86UT6-2;Q86UT6	NLR family member X1	NLRX1	1969
NaN	NaN	NaN	NaN	NaN	NaN	NaN	NaN	18.7464	1	1	1	1.5	1.5	1.5	67.034	0.0071162	1.5067	4506500	1	Q86V21-2;Q86V21	Q86V21-2;Q86V21	Acetoacetyl-CoA synthetase	AACS	1970
24.3435	21.9444	NaN	22.192	22.5347	23.2919	NaN	NaN	NaN	8	8	8	12.2	12.2	12.2	120.27	0	13.511	203200000	15	Q86V48;Q86V48-2;Q86V48-3	Q86V48;Q86V48-2;Q86V48-3	Leucine zipper protein 1	LUZP1	1971
NaN	21.2886	NaN	21.6659	NaN	23.3668	24.2656	NaN	NaN	3	3	3	14.4	14.4	14.4	26.888	0	43.856	223390000	21	Q86V81	Q86V81	THO complex subunit 4	ALYREF	1972
NaN	22.4532	NaN	23.7378	NaN	22.4416	22.0852	23.7001	22.7582	10	10	10	14.2	14.2	14.2	117.89	0	36.584	255790000	14	Q86VP6-2;Q86VP6;Q86VP6-3;O75155-2;O75155	Q86VP6-2;Q86VP6	Cullin-associated NEDD8-dissociated protein 1	CAND1	1974
NaN	NaN	NaN	NaN	NaN	NaN	NaN	NaN	20.868	2	2	2	7.7	7.7	7.7	51.396	0	29.757	34374000	7	Q86VR2	Q86VR2	Protein FAM134C	FAM134C	1975
NaN	NaN	NaN	NaN	NaN	20.7808	NaN	NaN	NaN	2	2	2	12.8	12.8	12.8	32.89	0	3.7629	12917000	3	Q86W42-3;Q86W42;Q86W42-2	Q86W42-3;Q86W42;Q86W42-2	THO complex subunit 6 homolog	THOC6	1976
21.828	21.8284	NaN	21.6975	NaN	NaN	21.8794	22.2298	21.8095	7	7	7	11.9	11.9	11.9	110.3	0	15.033	153070000	14	Q86W92-4;Q86W92;Q86W92-3;Q86W92-2;Q86W92-5	Q86W92-4;Q86W92;Q86W92-3;Q86W92-2	Liprin-beta-1	PPFIBP1	1977
NaN	NaN	NaN	NaN	NaN	NaN	NaN	NaN	20.4015	1	1	1	4.8	4.8	4.8	53.558	0.0011173	2.0675	12538000	0	Q86WB0-2;Q86WB0	Q86WB0-2;Q86WB0	Nuclear-interacting partner of ALK	ZC3HC1	1978
NaN	NaN	NaN	NaN	NaN	NaN	NaN	NaN	23.5328	1	1	1	0.3	0.3	0.3	465.73	0.0041667	1.6697	263410000	4	Q86WI1	Q86WI1	Fibrocystin-L	PKHD1L1	1979
NaN	NaN	NaN	NaN	NaN	NaN	NaN	NaN	20.3993	1	1	1	8.6	8.6	8.6	15.876	0	3.7016	8775100	1	Q86WQ0;Q86WQ0-2	Q86WQ0;Q86WQ0-2	Nuclear receptor 2C2-associated protein	NR2C2AP	1980
NaN	NaN	NaN	NaN	NaN	NaN	NaN	NaN	20.4171	2	2	2	17.1	17.1	17.1	16.474	0	5.2346	12299000	2	Q86WR0-2;Q86WR0	Q86WR0-2;Q86WR0	Coiled-coil domain-containing protein 25	CCDC25	1981
NaN	NaN	NaN	22.4778	NaN	NaN	NaN	NaN	NaN	3	3	3	18.5	18.5	18.5	42.192	0	28.802	26117000	5	Q86WV6	Q86WV6	Stimulator of interferon genes protein	TMEM173	1982
NaN	NaN	NaN	22.2262	NaN	NaN	NaN	22.1315	22.2196	3	3	3	7.2	7.2	7.2	65.853	0	6.1905	98088000	6	Q86X55;Q86X55-1;Q86X55-2	Q86X55;Q86X55-1;Q86X55-2	Histone-arginine methyltransferase CARM1	CARM1	1983
NaN	NaN	NaN	NaN	NaN	20.124	NaN	20.279	21.6244	3	3	3	13.1	13.1	13.1	31.858	0	3.3226	55761000	3	Q86X76-2;Q86X76-4;Q86X76;Q86X76-3	Q86X76-2;Q86X76-4;Q86X76;Q86X76-3	Nitrilase homolog 1	NIT1	1984
NaN	NaN	NaN	22.7168	22.2952	NaN	NaN	22.9441	23.0442	6	6	6	8.4	8.4	8.4	104.11	0	24.764	151650000	8	Q86XL3;Q86XL3-2	Q86XL3;Q86XL3-2	Ankyrin repeat and LEM domain-containing protein 2	ANKLE2	1985
NaN	NaN	NaN	NaN	NaN	NaN	NaN	NaN	19.3038	2	2	2	7.2	7.2	7.2	46.172	0	3.0167	23111000	2	Q86XR7-2;Q9Y3B3-2;Q9Y3B3	Q86XR7-2;Q9Y3B3-2;Q9Y3B3	Transmembrane emp24 domain-containing protein 7	TMED7	1986
NaN	21.3753	NaN	NaN	21.0068	NaN	NaN	NaN	NaN	2	2	2	7.2	7.2	7.2	44.41	0	2.7516	17504000	3	Q86Y07-4;Q86Y07-3;Q86Y07;Q86Y07-5;Q86Y07-2	Q86Y07-4;Q86Y07-3;Q86Y07;Q86Y07-5;Q86Y07-2	Serine/threonine-protein kinase VRK2	VRK2	1987
NaN	NaN	NaN	21.5272	NaN	NaN	NaN	NaN	NaN	2	2	2	5.6	5.6	5.6	51.943	0.0028379	1.8141	12594000	1	Q86Y22	Q86Y22	Collagen alpha-1(XXIII) chain	COL23A1	1988
NaN	NaN	NaN	22.8637	NaN	NaN	NaN	21.9244	21.4755	4	4	4	8.8	8.8	8.8	92.043	0	58.899	91689000	9	Q86Y56-2;Q86Y56	Q86Y56-2;Q86Y56	Dynein assembly factor 5, axonemal	DNAAF5	1989
NaN	NaN	NaN	NaN	NaN	NaN	NaN	21.3526	NaN	1	1	1	6.5	6.5	6.5	31.642	0.0007761	2.3767	50224000	3	Q86Y82	Q86Y82	Syntaxin-12	STX12	1990
NaN	NaN	NaN	NaN	NaN	NaN	NaN	NaN	NaN	1	1	1	3.8	3.8	3.8	65.225	0.0048259	1.6207	3139800	1	Q86YP4-2;Q86YP4;Q86YP4-3	Q86YP4-2;Q86YP4;Q86YP4-3	Transcriptional repressor p66-alpha	GATAD2A	1991
NaN	NaN	NaN	NaN	NaN	22.3576	NaN	NaN	NaN	3	3	3	8.1	8.1	8.1	81.966	0	2.6704	45228000	2	Q8IUD2-5;Q8IUD2-2;Q8IUD2-3;Q8IUD2;Q8IUD2-4	Q8IUD2-5;Q8IUD2-2;Q8IUD2-3;Q8IUD2;Q8IUD2-4	ELKS/Rab6-interacting/CAST family member 1	ERC1	1992
NaN	NaN	NaN	NaN	NaN	22.2728	NaN	NaN	NaN	9	1	1	70.8	28.5	28.5	13.995	0	3.5069	25799000	2	Q8IUE6	Q8IUE6	Histone H2A type 2-B	HIST2H2AB	1993
NaN	NaN	NaN	NaN	NaN	NaN	NaN	NaN	NaN	1	1	1	7.1	7.1	7.1	31.818	0.0068074	1.5365	10899000	1	Q8IUF8-2;Q8IUF8-4;Q8IUF8	Q8IUF8-2;Q8IUF8-4;Q8IUF8	Bifunctional lysine-specific demethylase and histidyl-hydroxylase MINA	MINA	1994
NaN	NaN	NaN	NaN	NaN	NaN	NaN	22.3103	NaN	1	1	1	6.3	6.3	6.3	47.895	0.0028767	1.8759	59663000	3	Q8IUK5-4;Q8IUK5	Q8IUK5-4;Q8IUK5	Plexin domain-containing protein 1	PLXDC1	1995
NaN	22.1219	NaN	NaN	NaN	NaN	NaN	23.5189	21.9145	3	3	3	29.9	29.9	29.9	29.34	0	86.006	127880000	19	Q8IUW5	Q8IUW5	RELT-like protein 1	RELL1	1996
NaN	NaN	NaN	NaN	NaN	NaN	NaN	NaN	NaN	1	1	1	10	10	10	18.89	0.0048226	1.6156	16818000	1	Q8IUX1-4;Q8IUX1	Q8IUX1-4;Q8IUX1	Complex I assembly factor TMEM126B, mitochondrial	TMEM126B	1997
22.7452	23.0305	NaN	NaN	NaN	NaN	NaN	NaN	NaN	2	2	2	7.8	7.8	7.8	54.705	0	4.8882	76614000	3	Q8IV08	Q8IV08	Phospholipase D3	PLD3	1998
NaN	NaN	NaN	22.3483	NaN	NaN	NaN	NaN	NaN	3	3	3	10.5	10.5	10.5	40.822	0.0011148	2.0574	28813000	4	Q8IVD9	Q8IVD9	NudC domain-containing protein 3	NUDCD3	1999
21.8036	20.734	20.2467	20.4995	NaN	19.462	22.7644	23.815	26.4787	17	17	17	10.5	10.5	10.5	616.62	0	159.44	594020000	36	Q8IVF2;Q8IVF2-3;Q8IVF2-2	Q8IVF2;Q8IVF2-3	Protein AHNAK2	AHNAK2	2000
NaN	NaN	NaN	NaN	NaN	NaN	NaN	NaN	20.2069	3	2	2	3.3	3.3	3.3	111.26	0.00077429	2.3481	9528000	1	Q8IVF7-2;Q8IVF7-3;Q8IVF7	Q8IVF7-2;Q8IVF7-3;Q8IVF7	Formin-like protein 3	FMNL3	2001
NaN	22.2317	NaN	22.7526	23.2247	22.1444	NaN	22.1431	22.6467	5	5	5	13.6	13.6	13.6	81.836	0	18.487	162700000	13	Q8IVL6;Q8IVL6-2	Q8IVL6;Q8IVL6-2	Prolyl 3-hydroxylase 3	LEPREL2	2002
21.3449	21.2204	NaN	NaN	NaN	NaN	NaN	NaN	NaN	2	2	2	10.5	10.5	10.5	35.822	0.00076423	2.2378	28947000	7	Q8IVM0;Q8IVM0-2	Q8IVM0;Q8IVM0-2	Coiled-coil domain-containing protein 50	CCDC50	2003
NaN	NaN	NaN	20.7399	NaN	NaN	NaN	20.8724	NaN	4	4	4	17.9	17.9	17.9	42.961	0	5.8254	38138000	6	Q8IVS2	Q8IVS2	Malonyl-CoA-acyl carrier protein transacylase, mitochondrial	MCAT	2004
NaN	NaN	NaN	NaN	NaN	21.6293	21.5471	NaN	NaN	2	2	2	3.6	3.6	3.6	94.498	0	4.7079	37041000	10	Q8IWA0	Q8IWA0	WD repeat-containing protein 75	WDR75	2005
NaN	21.4213	21.2382	21.6941	21.0901	NaN	21.028	22.743	25.9551	5	5	5	17.6	17.6	17.6	46.323	0	11.389	478270000	7	Q8IWB7	Q8IWB7	WD repeat and FYVE domain-containing protein 1	WDFY1	2006
22.6281	NaN	NaN	24.1704	NaN	21.5635	22.8698	25.6166	24.8776	6	6	6	19.5	19.5	19.5	60.741	0	91.245	651140000	27	Q8IWE2;Q8IWE2-2	Q8IWE2;Q8IWE2-2	Protein NOXP20	FAM114A1	2007
NaN	NaN	NaN	NaN	NaN	NaN	NaN	NaN	20.2185	1	1	1	5.3	5.3	5.3	34.291	0.0077676	1.4861	14107000	1	Q8IWE4	Q8IWE4	DCN1-like protein 3	DCUN1D3	2008
21.3797	NaN	NaN	23.1819	NaN	NaN	21.2131	21.6273	22.2068	3	3	3	5.7	5.7	5.7	94.198	0	6.762	103820000	10	Q8IWT6	Q8IWT6	Volume-regulated anion channel subunit LRRC8A	LRRC8A	2009
22.0089	NaN	NaN	NaN	NaN	22.7134	22.1099	NaN	NaN	1	1	1	2	2	2	103.7	0	2.9312	78575000	9	Q8IWX8	Q8IWX8	Calcium homeostasis endoplasmic reticulum protein	CHERP	2010
NaN	NaN	NaN	NaN	NaN	NaN	NaN	NaN	19.5711	1	1	1	11.7	11.7	11.7	24.296	0	2.9593	7308600	1	Q8IWZ8-2;Q8IWZ8	Q8IWZ8-2;Q8IWZ8	SURP and G-patch domain-containing protein 1	SUGP1	2011
23.912	NaN	NaN	21.8548	NaN	23.8435	24.9361	21.6427	21.9656	12	12	12	20.6	20.6	20.6	115.18	0	23.734	337280000	28	Q8IX01-4;Q8IX01;Q8IX01-3	Q8IX01-4;Q8IX01;Q8IX01-3	SURP and G-patch domain-containing protein 2	SUGP2	2012
NaN	NaN	NaN	NaN	NaN	22.1551	21.8256	NaN	NaN	4	4	4	6.6	6.6	6.6	131.04	0	10.431	35737000	4	Q8IX12-2;Q8IX12	Q8IX12-2;Q8IX12	Cell division cycle and apoptosis regulator protein 1	CCAR1	2013
NaN	NaN	22.7151	22.4628	NaN	22.5356	NaN	NaN	22.5441	8	8	8	20.9	20.9	20.9	68.117	0	10.509	117140000	10	Q8IXI1;Q8IXI1-2	Q8IXI1	Mitochondrial Rho GTPase 2	RHOT2	2014
NaN	NaN	NaN	20.7449	NaN	NaN	NaN	NaN	NaN	2	2	2	6.5	6.5	6.5	28.264	0.0014755	2.0171	23684000	2	Q8IXI2-6;Q8IXI2-4;Q8IXI2;Q8IXI2-5;Q8IXI2-2;Q8IXI2-7;Q8IXI2-3	Q8IXI2-6;Q8IXI2-4;Q8IXI2;Q8IXI2-5;Q8IXI2-2;Q8IXI2-7;Q8IXI2-3	Mitochondrial Rho GTPase 1	RHOT1	2015
NaN	NaN	NaN	21.345	NaN	NaN	NaN	NaN	NaN	3	3	3	13.7	13.7	13.7	30.378	0.0031836	1.8005	29935000	1	Q8IXJ6-4;Q8IXJ6-2;Q8IXJ6-3;Q8IXJ6;Q8IXJ6-5	Q8IXJ6-4;Q8IXJ6-2;Q8IXJ6-3;Q8IXJ6	NAD-dependent protein deacetylase sirtuin-2	SIRT2	2016
NaN	NaN	NaN	NaN	NaN	NaN	NaN	NaN	NaN	1	1	1	4.3	4.3	4.3	66.234	0.0011132	2.0527	20299000	1	Q8IXL6	Q8IXL6	Extracellular serine/threonine protein kinase FAM20C	FAM20C	2017
NaN	NaN	NaN	NaN	NaN	NaN	NaN	NaN	NaN	1	1	1	5.9	5.9	5.9	20.01	0	2.9093	5565500	1	Q8IXL7-2	Q8IXL7-2			2018
NaN	NaN	NaN	NaN	NaN	20.2988	NaN	NaN	NaN	2	2	2	2.3	2.3	2.3	118.1	0.0028429	1.8226	6567400	2	Q8IXT5	Q8IXT5	RNA-binding protein 12B	RBM12B	2019
26.6141	NaN	NaN	27.3001	NaN	28.9161	27.0062	26.843	NaN	4	4	4	6	6	6	150.88	0	8.956	5463000000	6	Q8IY17-3;Q8IY17;Q8IY17-5;Q8IY17-2	Q8IY17-3;Q8IY17;Q8IY17-5;Q8IY17-2	Neuropathy target esterase	PNPLA6	2020
NaN	NaN	NaN	NaN	NaN	19.7373	NaN	NaN	NaN	1	1	1	16.7	16.7	16.7	12.969	0.0014804	2.0404	4449700	1	Q8IY31-4;Q8IY31;Q8IY31-3	Q8IY31-4;Q8IY31;Q8IY31-3	Intraflagellar transport protein 20 homolog	IFT20	2021
NaN	NaN	NaN	NaN	NaN	NaN	NaN	NaN	NaN	2	2	2	6.3	6.3	6.3	59.483	0	3.1988	4449200	3	Q8IY33-4;Q8IY33-2;Q8IY33-5;Q8IY33	Q8IY33-4;Q8IY33-2;Q8IY33-5;Q8IY33	MICAL-like protein 2	MICALL2	2022
NaN	NaN	NaN	21.7319	NaN	21.6511	NaN	21.1113	21.4431	6	6	6	16.4	16.4	16.4	77.859	0	5.8434	103100000	8	Q8IY67-2;Q8IY67	Q8IY67-2;Q8IY67	Ribonucleoprotein PTB-binding 1	RAVER1	2023
24.255	NaN	NaN	23.3939	NaN	26.0692	24.6218	NaN	22.983	19	19	19	27.7	27.7	27.7	96.557	0	51.318	721350000	51	Q8IY81	Q8IY81	pre-rRNA processing protein FTSJ3	FTSJ3	2024
NaN	NaN	NaN	NaN	NaN	NaN	NaN	NaN	NaN	1	1	1	6	6	6	30.549	0	37.494	26913000	6	Q8IY95-2;Q8IY95	Q8IY95-2;Q8IY95	Transmembrane protein 192	TMEM192	2025
NaN	NaN	NaN	NaN	NaN	NaN	NaN	NaN	19.9327	1	1	1	1.9	1.9	1.9	81.798	0.0041451	1.6367	9851900	1	Q8IYI6	Q8IYI6	Exocyst complex component 8	EXOC8	2026
NaN	NaN	NaN	NaN	NaN	NaN	23.2518	NaN	NaN	1	1	1	1.4	1.4	1.4	89.224	0.0041681	1.6739	130400000	2	Q8IYR2	Q8IYR2	SET and MYND domain-containing protein 4	SMYD4	2027
NaN	NaN	NaN	NaN	NaN	NaN	NaN	NaN	NaN	1	1	1	5.3	5.3	5.3	49.666	0	14.765	57546000	1	Q8IYU8	Q8IYU8	Calcium uptake protein 2, mitochondrial	MICU2	2028
NaN	NaN	NaN	NaN	NaN	NaN	NaN	NaN	20.9256	1	1	1	3.2	3.2	3.2	67.618	0	2.8045	25194000	1	Q8IZ07	Q8IZ07	Ankyrin repeat domain-containing protein 13A	ANKRD13A	2029
22.3198	NaN	NaN	21.0395	NaN	23.1389	22.7255	NaN	NaN	8	8	8	10.4	10.4	10.4	119.7	0	77.532	125300000	17	Q8IZL8	Q8IZL8	Proline-, glutamic acid- and leucine-rich protein 1	PELP1	2030
NaN	NaN	NaN	NaN	NaN	19.2035	NaN	NaN	NaN	2	2	2	8.2	8.2	8.2	35.92	0	8.3653	17067000	2	Q8IZP0-11;Q8IZP0-10;Q8IZP0-8;Q8IZP0-7;Q8IZP0-2;Q8IZP0-4;Q8IZP0-3;Q8IZP0-5;Q8IZP0-6;Q8IZP0-9;Q8IZP0-12;Q8IZP0	Q8IZP0-11;Q8IZP0-10;Q8IZP0-8;Q8IZP0-7;Q8IZP0-2;Q8IZP0-4;Q8IZP0-3;Q8IZP0-5;Q8IZP0-6;Q8IZP0-9;Q8IZP0-12;Q8IZP0	Abl interactor 1	ABI1	2031
NaN	NaN	NaN	NaN	NaN	NaN	NaN	23.7408	NaN	1	1	1	2.5	2.5	2.5	59.526	0.0065002	1.5679	88559000	2	Q8IZS8-3;Q8IZS8-2;Q8IZS8	Q8IZS8-3;Q8IZS8-2;Q8IZS8	Voltage-dependent calcium channel subunit alpha-2/delta-3;Voltage-dependent calcium channel subunit alpha-2-3;Voltage-dependent calcium channel subunit delta-3	CACNA2D3	2032
NaN	NaN	NaN	NaN	NaN	NaN	NaN	22.4171	21.0731	2	2	2	22.1	22.1	22.1	14.954	0.0051635	1.6083	50768000	3	Q8N111	Q8N111	Cell cycle exit and neuronal differentiation protein 1	CEND1	2033
NaN	NaN	NaN	NaN	NaN	NaN	NaN	21.2151	NaN	1	1	1	2.2	2.2	2.2	131.51	0	2.5902	37067000	2	Q8N122-3;Q8N122	Q8N122-3;Q8N122	Regulatory-associated protein of mTOR	RPTOR	2034
23.6244	25.4216	25.159	NaN	NaN	NaN	NaN	NaN	NaN	5	5	5	21.3	21.3	21.3	47.02	0	7.9715	121330000	6	Q8N126-2;Q8N126;Q8N126-3	Q8N126-2;Q8N126;Q8N126-3	Cell adhesion molecule 3	CADM3	2035
21.7575	NaN	NaN	21.4589	NaN	21.8211	NaN	NaN	21.961	2	2	2	14.9	14.9	14.9	28.309	0	3.5327	67395000	8	Q8N129	Q8N129	Protein canopy homolog 4	CNPY4	2036
21.2298	NaN	NaN	24.2984	22.0178	NaN	20.831	21.8614	NaN	2	2	2	5.8	5.8	5.8	19.678	0.0011186	2.0722	129730000	6	Q8N131-2;Q8N131	Q8N131-2;Q8N131	Porimin	TMEM123	2037
NaN	NaN	NaN	NaN	NaN	NaN	NaN	NaN	19.6226	1	1	1	10.9	10.9	10.9	15.689	0	37.041	22624000	5	Q8N138-4;Q8N138	Q8N138-4;Q8N138	ORM1-like protein 3	ORMDL3	2038
24.9507	22.385	NaN	24.1514	23.1067	25.5592	25.4339	21.8722	23.0502	18	18	18	32.3	32.3	32.3	103.14	0	96.075	721910000	61	Q8N163-2;Q8N163	Q8N163-2;Q8N163	Cell cycle and apoptosis regulator protein 2	CCAR2	2039
NaN	NaN	NaN	NaN	NaN	NaN	NaN	NaN	NaN	4	4	4	34.9	34.9	34.9	19.856	0	7.4564	50315000	3	Q8N183	Q8N183	Mimitin, mitochondrial	NDUFAF2	2040
NaN	NaN	NaN	22.6764	NaN	23.1873	23.4664	22.4491	23.088	7	7	7	16.5	16.5	16.5	93.487	0	100.34	227040000	22	Q8N1F7;Q8N1F7-2	Q8N1F7;Q8N1F7-2	Nuclear pore complex protein Nup93	NUP93	2041
23.3104	24.3997	23.8024	23.9447	25.0872	24.8988	22.3763	22.9562	22.1914	12	12	12	25.4	25.4	25.4	63.472	0	178.22	588390000	51	Q8N1G4	Q8N1G4	Leucine-rich repeat-containing protein 47	LRRC47	2042
NaN	NaN	NaN	NaN	NaN	NaN	NaN	NaN	NaN	1	1	1	4.6	4.6	4.6	68.165	0.0068236	1.5523	10464000	1	Q8N1H7	Q8N1H7	Protein SIX6OS1	SIX6OS1	2043
NaN	NaN	NaN	NaN	20.6805	NaN	NaN	NaN	NaN	2	2	2	5.9	5.9	5.9	51.459	0	4.6979	25587000	2	Q8N2G8-2;Q8N2G8-3;Q8N2G8	Q8N2G8-2;Q8N2G8-3;Q8N2G8	GH3 domain-containing protein	GHDC	2044
22.0614	22.4019	NaN	22.2358	NaN	22.4968	NaN	22.1464	NaN	3	3	3	15.8	15.8	15.8	41.386	0	4.2302	106520000	4	Q8N2K0-3;Q8N2K0;Q8N2K0-2	Q8N2K0-3;Q8N2K0;Q8N2K0-2	Monoacylglycerol lipase ABHD12	ABHD12	2045
21.4046	21.115	NaN	NaN	NaN	NaN	26.6359	NaN	NaN	24	24	24	25.1	25.1	25.1	169.48	0	323.31	486130000	100	Q8N2S1-3;Q8N2S1;Q8N2S1-2;Q8N2S1-4	Q8N2S1-3;Q8N2S1;Q8N2S1-2;Q8N2S1-4	Latent-transforming growth factor beta-binding protein 4	LTBP4	2046
NaN	NaN	NaN	NaN	NaN	NaN	NaN	NaN	21.3979	1	1	1	1.4	1.4	1.4	161.85	0	3.2838	18096000	2	Q8N3D4	Q8N3D4	EH domain-binding protein 1-like protein 1	EHBP1L1	2047
NaN	23.024	NaN	NaN	20.712	NaN	NaN	NaN	NaN	3	3	3	5.2	5.2	5.2	89.257	0	2.8394	21102000	6	Q8N3E9	Q8N3E9	1-phosphatidylinositol 4,5-bisphosphate phosphodiesterase delta-3	PLCD3	2048
NaN	NaN	NaN	NaN	NaN	22.4264	21.6028	NaN	NaN	5	5	5	10.2	10.2	10.2	96.395	0	5.2727	71214000	6	Q8N3V7-2;Q8N3V7-3;Q8N3V7	Q8N3V7-2;Q8N3V7-3;Q8N3V7	Synaptopodin	SYNPO	2049
NaN	NaN	NaN	NaN	NaN	NaN	NaN	NaN	NaN	1	1	1	11.2	11.2	11.2	23.094	0.0074324	1.489	23612000	1	Q8N3Z6-2;Q8N3Z6	Q8N3Z6-2;Q8N3Z6	Zinc finger CCHC domain-containing protein 7	ZCCHC7	2050
NaN	NaN	NaN	NaN	NaN	NaN	NaN	NaN	19.8345	1	1	1	13.4	13.4	13.4	15.396	0	5.2977	6453100	1	Q8N490-2	Q8N490-2			2051
NaN	NaN	NaN	NaN	NaN	NaN	NaN	22.5797	NaN	1	1	1	29.4	29.4	29.4	6.0352	0.00039683	2.5482	86953000	4	Q8N4H5;Q8N4H5-3;Q8N4H5-2	Q8N4H5;Q8N4H5-3;Q8N4H5-2	Mitochondrial import receptor subunit TOM5 homolog	TOMM5	2052
NaN	NaN	NaN	NaN	NaN	NaN	NaN	NaN	NaN	1	1	1	18.3	18.3	18.3	14.686	0	20.062	90429000	6	Q8N4V1;Q8N4V1-2	Q8N4V1;Q8N4V1-2	Membrane magnesium transporter 1	MMGT1	2053
NaN	NaN	22.3293	23.4691	22.721	22.263	NaN	21.9292	22.7955	3	3	3	18.8	18.8	18.8	23.13	0	6.2267	172380000	6	Q8N511	Q8N511	Transmembrane protein 199	TMEM199	2054
NaN	NaN	NaN	22.2216	NaN	NaN	NaN	21.4232	NaN	2	2	2	11.7	11.7	11.7	35.17	0	3.6643	40762000	5	Q8N5C1	Q8N5C1	Protein FAM26E	FAM26E	2055
NaN	NaN	NaN	NaN	NaN	NaN	NaN	NaN	19.9675	1	1	1	9.2	9.2	9.2	12.087	0.0031892	1.8053	24919000	1	Q8N5C7-3;Q8N5C7	Q8N5C7-3;Q8N5C7	DTW domain-containing protein 1	DTWD1	2056
NaN	21.3804	NaN	21.6219	21.4317	21.1777	NaN	22.381	21.0992	4	4	4	33.3	33.3	33.3	15.278	0	5.3065	84255000	8	Q8N5K1	Q8N5K1	CDGSH iron-sulfur domain-containing protein 2	CISD2	2057
NaN	NaN	NaN	20.7193	20.4255	22.06	20.924	NaN	NaN	2	2	2	5.8	5.8	5.8	51.095	0	3.5862	47318000	6	Q8N684-2;Q8N684;Q8N684-3	Q8N684-2;Q8N684;Q8N684-3	Cleavage and polyadenylation specificity factor subunit 7	CPSF7	2058
NaN	NaN	NaN	NaN	NaN	NaN	20.6047	NaN	NaN	2	2	2	7.1	7.1	7.1	48.764	0.0031791	1.7974	8433500	2	Q8N6G6-2;Q8N6G6-1;Q8N6G6-4;Q8N6G6	Q8N6G6-2;Q8N6G6-1;Q8N6G6-4;Q8N6G6	ADAMTS-like protein 1	ADAMTSL1	2059
NaN	NaN	NaN	NaN	NaN	NaN	NaN	20.8336	20.7822	2	2	2	10.6	10.6	10.6	33.812	0	7.8389	29843000	5	Q8N6M0;Q8N6M0-2	Q8N6M0;Q8N6M0-2	OTU domain-containing protein 6B	OTUD6B	2060
NaN	NaN	NaN	21.4054	21.1033	NaN	NaN	21.4811	20.6799	2	2	2	20.8	20.8	20.8	24.676	0	6.3208	54738000	6	Q8N6S5	Q8N6S5	ADP-ribosylation factor-like protein 6-interacting protein 6	ARL6IP6	2061
NaN	NaN	NaN	23.8114	22.5286	22.1868	22.1622	23.5866	22.9159	6	6	6	33.3	33.3	33.3	44.467	0	18.62	256690000	15	Q8N6T3-3;Q8N6T3;Q8N6T3-5;Q8N6T3-2;Q8N6T3-4	Q8N6T3-3;Q8N6T3;Q8N6T3-5;Q8N6T3-2;Q8N6T3-4	ADP-ribosylation factor GTPase-activating protein 1	ARFGAP1	2062
NaN	22.7896	NaN	23.1352	23.2949	23.5527	NaN	23.7499	23.8545	10	10	10	16.1	16.1	16.1	111.69	0	38.695	345300000	31	Q8N766-3;Q8N766-2;Q8N766;Q8N766-4	Q8N766-3;Q8N766-2;Q8N766;Q8N766-4	ER membrane protein complex subunit 1	EMC1	2063
22.5623	NaN	NaN	21.9726	NaN	22.8893	23.2613	NaN	NaN	3	3	3	8.4	8.4	8.4	72.456	0	9.014	148730000	12	Q8N8A6	Q8N8A6	ATP-dependent RNA helicase DDX51	DDX51	2064
NaN	22.0839	NaN	NaN	22.8445	21.6077	NaN	NaN	NaN	4	4	4	15.6	15.6	15.6	60.348	0	7.6901	74794000	7	Q8N8S7-3;Q8N8S7-2;Q8N8S7	Q8N8S7-3;Q8N8S7-2;Q8N8S7	Protein enabled homolog	ENAH	2065
22.3062	23.2329	NaN	25.9621	24.5228	21.49	NaN	24.7817	22.0691	7	7	7	17.1	17.1	17.1	77.92	0	156.47	581380000	26	Q8N8Z6;Q8N8Z6-2	Q8N8Z6	Discoidin, CUB and LCCL domain-containing protein 1	DCBLD1	2066
NaN	NaN	NaN	NaN	NaN	NaN	NaN	NaN	NaN	1	1	1	2	2	2	74.652	0.0014711	2.0084	954200000	2	Q8N972	Q8N972	Zinc finger protein 709	ZNF709	2067
NaN	NaN	NaN	NaN	NaN	NaN	20.2474	NaN	NaN	1	1	1	2.8	2.8	2.8	41.227	0.0034965	1.7223	11736000	1	Q8N9N2-2;Q8N9N2	Q8N9N2-2;Q8N9N2	Activating signal cointegrator 1 complex subunit 1	ASCC1	2068
NaN	20.4764	20.5218	20.9986	21.0139	NaN	NaN	22.2086	22.7245	2	2	2	24.8	24.8	24.8	19.053	0	55.944	95829000	7	Q8N9N8	Q8N9N8	Probable RNA-binding protein EIF1AD	EIF1AD	2069
NaN	NaN	NaN	NaN	NaN	NaN	NaN	NaN	NaN	1	1	1	7.7	7.7	7.7	18.177	0.003499	1.7256	5273700000	6	Q8N9Q2	Q8N9Q2	Protein SREK1IP1	SREK1IP1	2070
NaN	NaN	NaN	NaN	NaN	NaN	NaN	NaN	NaN	2	2	2	5.4	5.4	5.4	82.597	0.00079051	2.5093	15432000	3	Q8N9T8	Q8N9T8	Protein KRI1 homolog	KRI1	2071
NaN	NaN	NaN	NaN	NaN	NaN	21.573	NaN	NaN	2	2	2	11.1	11.1	11.1	26.261	0.00147	2.0051	14986000	4	Q8N9Z2	Q8N9Z2	Coiled-coil domain-containing protein 71L	CCDC71L	2072
NaN	NaN	NaN	NaN	NaN	NaN	NaN	NaN	NaN	1	1	1	3.8	3.8	3.8	37.476	0	9.2913	24178000	7	Q8NAV1	Q8NAV1	Pre-mRNA-splicing factor 38A	PRPF38A	2073
NaN	23.1947	NaN	23.0393	22.5041	NaN	NaN	24.5644	23.0255	6	6	6	7.5	7.5	7.5	126.71	0	116.5	296850000	18	Q8NB49-2;Q8NB49-3;Q8NB49-4;Q8NB49	Q8NB49-2;Q8NB49-3;Q8NB49-4;Q8NB49	Phospholipid-transporting ATPase IG	ATP11C	2074
NaN	NaN	NaN	NaN	NaN	NaN	NaN	NaN	NaN	1	1	1	3.9	3.9	3.9	54.528	0	69.01	33340000	2	Q8NBI5;Q8NBI5-2	Q8NBI5;Q8NBI5-2	Solute carrier family 43 member 3	SLC43A3	2075
[truncated: 921 more rows]
