# Supplementary material for: Surfaceome Proteomic of Glioblastoma Revealed Potential Targets for Immunotherapy
Source: Front Immunol. 2021 Sep 27;12:746168. doi: 10.3389/fimmu.2021.746168 (PMC8503648; doi:10.3389/fimmu.2021.746168)
Supplement: Supplementary Data Sheet 2 — Proteins list for the clusters of the heatmap Figure 1 . [file DataSheet_2.xlsx]

## Sheet: Feuil1
Proteins found in 70% of the 50 patients (Drelich et al., 2020)			Not in CSPA GBM
Cluster 1				Cluster 2				Cluster 3				Cluster 4
Majority protein IDs	Protein names	Gene names		Majority protein IDs	Protein names	Gene names		Majority protein IDs	Protein names	Gene names		Majority protein IDs	Protein names	Gene names
P35556	Fibrillin-2	FBN2		Q04721	Neurogenic locus notch homolog protein 2;Notch 2 extracellular truncation;Notch 2 intracellular domain	NOTCH2		Q96RF0	Sorting nexin-18	SNX18		Q07954	Prolow-density lipoprotein receptor-related protein 1;Low-density lipoprotein receptor-related protein 1 85 kDa subunit;Low-density lipoprotein receptor-related protein 1 515 kDa subunit;Low-density lipoprotein receptor-related protein 1 intracellular domain	LRP1
P14923	Junction plakoglobin	JUP		Q9P2B2	Prostaglandin F2 receptor negative regulator	PTGFRN		Q05707	Collagen alpha-1(XIV) chain	COL14A1		P17301	Integrin alpha-2	ITGA2
P27105	Erythrocyte band 7 integral membrane protein	STOM		Q9UJS0	Calcium-binding mitochondrial carrier protein Aralar2	SLC25A13		Q70UQ0	Inhibitor of nuclear factor kappa-B kinase-interacting protein	IKBIP		P01911	HLA class II histocompatibility antigen, DRB1-15 beta chain	HLA-DRB1
Q8N126	Cell adhesion molecule 3	CADM3		P12111	Collagen alpha-3(VI) chain	COL6A3		P11233	Ras-related protein Ral-A	RALA		P58335	Anthrax toxin receptor 2	ANTXR2
Q8NFZ8	Cell adhesion molecule 4	CADM4		P12109	Collagen alpha-1(VI) chain	COL6A1		P28300	Protein-lysine 6-oxidase	LOX		O95477	ATP-binding cassette sub-family A member 1	ABCA1
P56159	GDNF family receptor alpha-1	GFRA1		Q12797	Aspartyl/asparaginyl beta-hydroxylase	ASPH		P50454	Serpin H1	SERPINH1		P26006	Integrin alpha-3;Integrin alpha-3 heavy chain;Integrin alpha-3 light chain	ITGA3
P05783	Keratin, type I cytoskeletal 18	KRT18		P07711	Cathepsin L1;Cathepsin L1 heavy chain;Cathepsin L1 light chain	CTSL		P08123	Collagen alpha-2(I) chain	COL1A2		P21589	5-nucleotidase	NT5E
Q8IV08	Phospholipase D3	PLD3		Q14643	Inositol 1,4,5-trisphosphate receptor type 1	ITPR1		Q9HDC9	Adipocyte plasma membrane-associated protein	APMAP		P11717	Cation-independent mannose-6-phosphate receptor	IGF2R
Q92823	Neuronal cell adhesion molecule	NRCAM		Q9UNN8	Endothelial protein C receptor	PROCR		P09486	SPARC	SPARC		Q9UM22	Mammalian ependymin-related protein 1	EPDR1
P62942	Peptidyl-prolyl cis-trans isomerase FKBP1A	FKBP1A		Q16832	Discoidin domain-containing receptor 2	DDR2		Q9UH99	SUN domain-containing protein 2	SUN2		O75578	Integrin alpha-10	ITGA10
P15311	Ezrin	EZR		Q13641	Trophoblast glycoprotein	TPBG		P32004	Neural cell adhesion molecule L1	L1CAM
P14174	Macrophage migration inhibitory factor	MIF		P68366	Tubulin alpha-4A chain	TUBA4A		P19320	Vascular cell adhesion protein 1	VCAM1
				P22413	Ectonucleotide pyrophosphatase/phosphodiesterase family member 1;Alkaline phosphodiesterase I;Nucleotide pyrophosphatase	ENPP1		Q9BY67	Cell adhesion molecule 1	CADM1
				P10809	60 kDa heat shock protein, mitochondrial	HSPD1		Q96D15	Reticulocalbin-3	RCN3
				O15460	Prolyl 4-hydroxylase subunit alpha-2	P4HA2		Q05682	Caldesmon	CALD1
