# Supplementary material for: Surfaceome Proteomic of Glioblastoma Revealed Potential Targets for Immunotherapy
Source: Front Immunol. 2021 Sep 27;12:746168. doi: 10.3389/fimmu.2021.746168 (PMC8503648; doi:10.3389/fimmu.2021.746168)
Supplement: Supplementary Data Sheet 3 — p-value of proteins presented on the heatmap. [file DataSheet_3.xlsx]

## Sheet: Feuil1
Majority protein IDs	Protein names	Gene names	ANOVA p value
A0AVT1;A0AVT1-2	Ubiquitin-like modifier-activating enzyme 6	UBA6	0.0248494
O00562-2;O00562	Membrane-associated phosphatidylinositol transfer protein 1	PITPNM1	0.0211493
O14558	Heat shock protein beta-6	HSPB6	0.00534686
O14810	Complexin-1	CPLX1	0.00648262
O15355	Protein phosphatase 1G	PPM1G	0.0490303
O15460-2;O15460	Prolyl 4-hydroxylase subunit alpha-2	P4HA2	0.0396776
O43175	D-3-phosphoglycerate dehydrogenase	PHGDH	0.0359695
O43504	Ragulator complex protein LAMTOR5	LAMTOR5	0.0181595
O43854-2;O43854	EGF-like repeat and discoidin I-like domain-containing protein 3	EDIL3	0.0436635
O60245;O60245-2	Protocadherin-7	PCDH7	0.0117418
O60313-13;O60313;O60313-9;O60313-11;O60313-2;O60313-10	Dynamin-like 120 kDa protein, mitochondrial;Dynamin-like 120 kDa protein, form S1	OPA1	0.00263568
O60476	Mannosyl-oligosaccharide 1,2-alpha-mannosidase IB	MAN1A2	0.0259528
O60762	Dolichol-phosphate mannosyltransferase subunit 1	DPM1	0.0136194
O75083;O75083-3	WD repeat-containing protein 1	WDR1	0.0443391
O75131	Copine-3	CPNE3	0.00149907
O75347;O75347-2	Tubulin-specific chaperone A	TBCA	0.0461212
O75578	Integrin alpha-10	ITGA10	0.0194593
O94826	Mitochondrial import receptor subunit TOM70	TOMM70A	0.0377516
O94925-3;O94925	Glutaminase kidney isoform, mitochondrial	GLS	0.0176666
O95336	6-phosphogluconolactonase	PGLS	0.00149349
O95477	ATP-binding cassette sub-family A member 1	ABCA1	0.046067
O95573	Long-chain-fatty-acid--CoA ligase 3	ACSL3	0.00387034
O95864-3;O95864;O95864-4;O95864-2	Fatty acid desaturase 2	FADS2	0.0149486
P00338;P00338-3;P00338-4;P00338-5;P00338-2	L-lactate dehydrogenase A chain	LDHA	0.0112692
P01130-3;P01130-6;P01130-4;P01130;P01130-2;P01130-5	Low-density lipoprotein receptor	LDLR	0.0312872
P01911	HLA class II histocompatibility antigen, DRB1-15 beta chain	HLA-DRB1	0.00230762
P02452	Collagen alpha-1(I) chain	COL1A1	0.00219508
P04216	Thy-1 membrane glycoprotein	THY1	0.000117726
P05783	Keratin, type I cytoskeletal 18	KRT18	0.000104784
P06576	ATP synthase subunit beta, mitochondrial	ATP5B	0.00697322
P07711	Cathepsin L1;Cathepsin L1 heavy chain;Cathepsin L1 light chain	CTSL	0.00331952
P08123	Collagen alpha-2(I) chain	COL1A2	0.028467
P08253-2;P08253-3;P08253	72 kDa type IV collagenase;PEX	MMP2	0.000494743
P08574	Cytochrome c1, heme protein, mitochondrial	CYC1	0.0366296
P09486	SPARC	SPARC	0.0162499
P09493-3;P09493-4;P09493-10;P09493-9;P09493;P09493-8	Tropomyosin alpha-1 chain	TPM1	0.0197365
P0DN76;Q01081-2;Q01081;Q01081-4	Splicing factor U2AF 35 kDa subunit	U2AF1	0.024613
P0DPH8;P0DPH7;P0DPH7-2;Q6PEY2	Tubulin alpha-3E chain	TUBA3E	4.929e-05
P10809	60 kDa heat shock protein, mitochondrial	HSPD1	0.0460302
P11233	Ras-related protein Ral-A	RALA	0.0363409
P11717	Cation-independent mannose-6-phosphate receptor	IGF2R	0.0315105
P12109	Collagen alpha-1(VI) chain	COL6A1	0.0119781
P12111-2;P12111;P12111-4	Collagen alpha-3(VI) chain	COL6A3	0.00503962
P12236	ADP/ATP translocase 3;ADP/ATP translocase 3, N-terminally processed	SLC25A6	0.017749
P13489	Ribonuclease inhibitor	RNH1	0.0488901
P13995-2;P13995	Bifunctional methylenetetrahydrofolate dehydrogenase/cyclohydrolase, mitochondrial;NAD-dependent methylenetetrahydrofolate dehydrogenase;Methenyltetrahydrofolate cyclohydrolase	MTHFD2	0.0466674
P14174	Macrophage migration inhibitory factor	MIF	0.0363163
P14923	Junction plakoglobin	JUP	5.37095e-06
P14927;P14927-2	Cytochrome b-c1 complex subunit 7	UQCRB	0.0180492
P15121	Aldose reductase	AKR1B1	0.0397448
P15144	Aminopeptidase N	ANPEP	0.00516177
P15153	Ras-related C3 botulinum toxin substrate 2	RAC2	0.00215154
P15311	Ezrin	EZR	0.0160261
P17096;P17096-2;P17096-3	High mobility group protein HMG-I/HMG-Y	HMGA1	0.000237019
P17252	Protein kinase C alpha type	PRKCA	0.0335355
P17301	Integrin alpha-2	ITGA2	0.0392756
P19320;P19320-2;P19320-3	Vascular cell adhesion protein 1	VCAM1	1.8624e-06
P19404	NADH dehydrogenase [ubiquinone] flavoprotein 2, mitochondrial	NDUFV2	0.00942298
P21397-2;P21397	Amine oxidase [flavin-containing] A	MAOA	0.00920766
P21589;P21589-2	5-nucleotidase	NT5E	0.0165226
P22413	Ectonucleotide pyrophosphatase/phosphodiesterase family member 1;Alkaline phosphodiesterase I;Nucleotide pyrophosphatase	ENPP1	0.0105101
P22830;P22830-2	Ferrochelatase, mitochondrial	FECH	0.00374998
P26006;P26006-1	Integrin alpha-3;Integrin alpha-3 heavy chain;Integrin alpha-3 light chain	ITGA3	0.0463321
P27105;P27105-2	Erythrocyte band 7 integral membrane protein	STOM	0.0183015
P27797	Calreticulin	CALR	0.0214692
P28300	Protein-lysine 6-oxidase	LOX	0.0307475
P28331-4;P28331-5;P28331;P28331-2;P28331-3	NADH-ubiquinone oxidoreductase 75 kDa subunit, mitochondrial	NDUFS1	0.0122515
P30837	Aldehyde dehydrogenase X, mitochondrial	ALDH1B1	0.0145501
P32004-3;P32004-2;P32004	Neural cell adhesion molecule L1	L1CAM	0.00835511
P32322;P32322-3;P32322-2	Pyrroline-5-carboxylate reductase 1, mitochondrial	PYCR1	0.0160468
P33121-2;P33121-3;P33121	Long-chain-fatty-acid--CoA ligase 1	ACSL1	0.0208613
P35556;P35556-2	Fibrillin-2	FBN2	0.0110995
P39060-2;P39060-1;P39060	Collagen alpha-1(XVIII) chain;Endostatin	COL18A1	0.000274911
P42167;P42167-2	Lamina-associated polypeptide 2, isoforms beta/gamma;Thymopoietin;Thymopentin	TMPO	0.041292
P43490	Nicotinamide phosphoribosyltransferase	NAMPT	0.00955195
P47755;P47755-2	F-actin-capping protein subunit alpha-2	CAPZA2	0.000274282
P47895	Aldehyde dehydrogenase family 1 member A3	ALDH1A3	0.000431005
P48681	Nestin	NES	0.000978175
P49748-2;P49748;P49748-3	Very long-chain specific acyl-CoA dehydrogenase, mitochondrial	ACADVL	0.00411783
P50454	Serpin H1	SERPINH1	0.0467233
P50479;P50479-2	PDZ and LIM domain protein 4	PDLIM4	0.005655
P50895	Basal cell adhesion molecule	BCAM	0.00574921
P51571	Translocon-associated protein subunit delta	SSR4	0.00314242
P51843-2;P51843	Nuclear receptor subfamily 0 group B member 1	NR0B1	0.00234002
P54136;P54136-2	Arginine--tRNA ligase, cytoplasmic	RARS	0.0109425
P54289-4;P54289-5;P54289;P54289-3;P54289-2	Voltage-dependent calcium channel subunit alpha-2/delta-1;Voltage-dependent calcium channel subunit alpha-2-1;Voltage-dependent calcium channel subunit delta-1	CACNA2D1	0.00023841
P56159-2;P56159	GDNF family receptor alpha-1	GFRA1	0.000266048
P58335-2;P58335-4;P58335;P58335-3	Anthrax toxin receptor 2	ANTXR2	0.0265284
P61221	ATP-binding cassette sub-family E member 1	ABCE1	0.0402395
P62942	Peptidyl-prolyl cis-trans isomerase FKBP1A	FKBP1A	0.0364117
P62987;P62979;P0CG47;P0CG48	Ubiquitin-60S ribosomal protein L40;Ubiquitin;60S ribosomal protein L40;Ubiquitin-40S ribosomal protein S27a;Ubiquitin;40S ribosomal protein S27a;Polyubiquitin-B;Ubiquitin;Polyubiquitin-C;Ubiquitin	UBA52;RPS27A;UBB;UBC	0.0331405
P68366-2;P68366	Tubulin alpha-4A chain	TUBA4A	0.0433971
P98179	RNA-binding protein 3	RBM3	0.0454831
Q01813;Q01813-2	ATP-dependent 6-phosphofructokinase, platelet type	PFKP	0.0409554
Q04446	1,4-alpha-glucan-branching enzyme	GBE1	0.00177741
Q04721	Neurogenic locus notch homolog protein 2;Notch 2 extracellular truncation;Notch 2 intracellular domain	NOTCH2	0.0395984
Q04828;P42330	Aldo-keto reductase family 1 member C1;Aldo-keto reductase family 1 member C3	AKR1C1;AKR1C3	0.00390737
Q05682-5;Q05682-4;Q05682-3;Q05682-6;Q05682-2;Q05682	Caldesmon	CALD1	0.0441569
Q05707-3;Q05707-2;Q05707	Collagen alpha-1(XIV) chain	COL14A1	0.0128031
Q06203	Amidophosphoribosyltransferase	PPAT	0.00717369
Q07954	Prolow-density lipoprotein receptor-related protein 1;Low-density lipoprotein receptor-related protein 1 85 kDa subunit;Low-density lipoprotein receptor-related protein 1 515 kDa subunit;Low-density lipoprotein receptor-related protein 1 intracellular domain	LRP1	0.0360985
Q12797-10;Q12797	Aspartyl/asparaginyl beta-hydroxylase	ASPH	0.0153544
Q13308;Q13308-6;Q13308-4;Q13308-2;Q13308-3;Q13308-5	Inactive tyrosine-protein kinase 7	PTK7	0.000713605
Q13418;Q13418-3;Q13418-2	Integrin-linked protein kinase	ILK	0.000251862
Q13451;Q13451-2	Peptidyl-prolyl cis-trans isomerase FKBP5;Peptidyl-prolyl cis-trans isomerase FKBP5, N-terminally processed	FKBP5	0.00939415
Q13501-2;Q13501	Sequestosome-1	SQSTM1	0.0436301
Q13641	Trophoblast glycoprotein	TPBG	0.0214001
Q13643	Four and a half LIM domains protein 3	FHL3	0.00217246
Q13671-2;Q13671	Ras and Rab interactor 1	RIN1	0.00980452
Q13683-13;Q13683-3;Q13683-9;Q13683-7;Q13683;Q13683-10	Integrin alpha-7;Integrin alpha-7 heavy chain;Integrin alpha-7 light chain;Integrin alpha-7 70 kDa form	ITGA7	0.0383584
Q14011;Q14011-2	Cold-inducible RNA-binding protein	CIRBP	0.0472305
Q14126	Desmoglein-2	DSG2	0.0078087
Q14195-2;Q14195	Dihydropyrimidinase-related protein 3	DPYSL3	0.0208311
Q14247-3;Q14247;Q14247-2	Src substrate cortactin	CTTN	0.0365348
Q14332	Frizzled-2	FZD2	0.00976154
Q14643-4;Q14643-3;Q14643-8;Q14643-7;Q14643-5;Q14643-6;Q14643-2;Q14643	Inositol 1,4,5-trisphosphate receptor type 1	ITPR1	0.000521522
Q14699	Raftlin	RFTN1	0.00520558
Q15417-3;Q15417;Q15417-2	Calponin-3	CNN3	0.00142483
Q15436	Protein transport protein Sec23A	SEC23A	0.00998947
Q16555-2;Q16555	Dihydropyrimidinase-related protein 2	DPYSL2	0.0431378
Q16678	Cytochrome P450 1B1	CYP1B1	0.00863922
Q16832	Discoidin domain-containing receptor 2	DDR2	0.0335286
Q32MZ4-3;Q32MZ4-2;Q32MZ4	Leucine-rich repeat flightless-interacting protein 1	LRRFIP1	0.00940736
Q4V9L6	Transmembrane protein 119	TMEM119	0.0166393
Q53EP0	Fibronectin type III domain-containing protein 3B	FNDC3B	0.032354
Q53EU6	Glycerol-3-phosphate acyltransferase 3	AGPAT9	0.0273875
Q53TN4-3;Q53TN4	Cytochrome b reductase 1	CYBRD1	0.00924201
Q658P3-3;Q658P3;Q658P3-2;Q658P3-4	Metalloreductase STEAP3	STEAP3	0.00395994
Q6NUK1-2;Q6NUK1	Calcium-binding mitochondrial carrier protein SCaMC-1	SLC25A24	0.0260042
Q6P996-4;Q6P996-5;Q6P996;Q6P996-3	Pyridoxal-dependent decarboxylase domain-containing protein 1	PDXDC1	0.00988311
Q6UX53	Methyltransferase-like protein 7B	METTL7B	0.0435689
Q70UQ0;Q70UQ0-2	Inhibitor of nuclear factor kappa-B kinase-interacting protein	IKBIP	0.0120936
Q8IV08	Phospholipase D3	PLD3	0.0456551
Q8IVF2;Q8IVF2-3	Protein AHNAK2	AHNAK2	0.0113635
Q8N126-2;Q8N126;Q8N126-3	Cell adhesion molecule 3	CADM3	0.000189949
Q8N1G4	Leucine-rich repeat-containing protein 47	LRRC47	0.00713801
Q8N6T3-3;Q8N6T3;Q8N6T3-5;Q8N6T3-2;Q8N6T3-4	ADP-ribosylation factor GTPase-activating protein 1	ARFGAP1	0.0212202
Q8NBJ7-2;Q8NBJ7;Q8NBJ7-5;Q8NBJ7-3	Sulfatase-modifying factor 2	SUMF2	0.0340028
Q8NCL9	Protein APCDD1-like	APCDD1L	0.0384902
Q8NFZ8	Cell adhesion molecule 4	CADM4	0.000927279
Q8TB36;Q8TB36-2	Ganglioside-induced differentiation-associated protein 1	GDAP1	0.00163621
Q8WUM9	Sodium-dependent phosphate transporter 1	SLC20A1	0.0480082
Q8WVC6;Q8WVC6-2	Dephospho-CoA kinase domain-containing protein	DCAKD	0.00496409
Q8WVX9	Fatty acyl-CoA reductase 1	FAR1	0.0332029
Q8WX93-3;Q8WX93;Q8WX93-8;Q8WX93-5;Q8WX93-4;Q8WX93-2;Q8WX93-9;Q8WX93-7	Palladin	PALLD	0.00531234
Q92508	Piezo-type mechanosensitive ion channel component 1	PIEZO1	0.0446339
Q92626;Q92626-2	Peroxidasin homolog	PXDN	0.000127572
Q92823-3;Q92823-4;Q92823-6;Q92823-2;Q92823;Q92823-5	Neuronal cell adhesion molecule	NRCAM	0.0120205
Q93052	Lipoma-preferred partner	LPP	0.023921
Q969G5	Protein kinase C delta-binding protein	PRKCDBP	0.00490363
Q96A33-2;Q96A33	Coiled-coil domain-containing protein 47	CCDC47	0.0315199
Q96AG4	Leucine-rich repeat-containing protein 59	LRRC59	0.0166469
Q96CX2	BTB/POZ domain-containing protein KCTD12	KCTD12	0.000278444
Q96D15	Reticulocalbin-3	RCN3	0.0422582
Q96FQ6	Protein S100-A16	S100A16	0.00132923
Q96I24	Far upstream element-binding protein 3	FUBP3	0.0384116
Q96RF0-3;Q96RF0-2;Q96RF0	Sorting nexin-18	SNX18	0.0114647
Q96TA1-2;Q96TA1	Niban-like protein 1	FAM129B	0.00759438
Q99426;Q99426-2	Tubulin-folding cofactor B	TBCB	0.0376543
Q99439;Q99439-2	Calponin-2	CNN2	0.0171549
Q99829	Copine-1	CPNE1	0.0247616
Q99961;Q99961-3	Endophilin-A2	SH3GL1	0.0195915
Q9BPW8	Protein NipSnap homolog 1	NIPSNAP1	0.0140495
Q9BPX6-2;Q9BPX6;Q9BPX6-3	Calcium uptake protein 1, mitochondrial	MICU1	0.0412004
Q9BQE5	Apolipoprotein L2	APOL2	0.0104303
Q9BV36-5;Q9BV36-3;Q9BV36-2;Q9BV36	Melanophilin	MLPH	0.0108714
Q9BWM7	Sideroflexin-3	SFXN3	0.0374644
Q9BY67-5;Q9BY67;Q9BY67-4;Q9BY67-3;Q9BY67-2	Cell adhesion molecule 1	CADM1	0.00828671
Q9BYC5;Q9BYC5-3;Q9BYC5-2	Alpha-(1,6)-fucosyltransferase	FUT8	0.00525674
Q9BZQ8	Protein Niban	FAM129A	0.00163835
Q9GZP9	Derlin-2	DERL2	0.0198461
Q9H0P0;Q9H0P0-3;Q9H0P0-2;Q9H0P0-1	Cytosolic 5-nucleotidase 3A	NT5C3A	0.0490443
Q9H3H3-3;Q9H3H3;Q9H3H3-1	UPF0696 protein C11orf68	C11orf68	0.0177061
Q9H4M9	EH domain-containing protein 1	EHD1	0.0492449
Q9HD45	Transmembrane 9 superfamily member 3	TM9SF3	0.0364439
Q9HDC9;Q9HDC9-2	Adipocyte plasma membrane-associated protein	APMAP	0.0108408
Q9NYL4-2;Q9NYL4	Peptidyl-prolyl cis-trans isomerase FKBP11	FKBP11	0.000296108
Q9P2B2	Prostaglandin F2 receptor negative regulator	PTGFRN	0.0245671
Q9UH99;Q9UH99-3;Q9UH99-2	SUN domain-containing protein 2	SUN2	0.017626
Q9UI09	NADH dehydrogenase [ubiquinone] 1 alpha subcomplex subunit 12	NDUFA12	0.0156729
Q9UJS0;Q9UJS0-2	Calcium-binding mitochondrial carrier protein Aralar2	SLC25A13	0.00126566
Q9UM22;Q9UM22-2	Mammalian ependymin-related protein 1	EPDR1	0.0147283
Q9UMF0	Intercellular adhesion molecule 5	ICAM5	0.0232318
Q9UNN8	Endothelial protein C receptor	PROCR	0.0202591
Q9Y2D5;Q9Y2D5-5;Q9Y2D5-7;Q9Y2D5-6;Q9Y2D5-4	A-kinase anchor protein 2	AKAP2	0.0052829
Q9Y3D0	Mitotic spindle-associated MMXD complex subunit MIP18	FAM96B	0.00428346
Q9Y4K1	Absent in melanoma 1 protein	AIM1	0.0238207
Q9Y4W6	AFG3-like protein 2	AFG3L2	0.00777932
Q9Y5J7	Mitochondrial import inner membrane translocase subunit Tim9	TIMM9	0.0250252
Q9Y5X1	Sorting nexin-9	SNX9	0.0171103
