# Supplementary material for: Surfaceome Proteomic of Glioblastoma Revealed Potential Targets for Immunotherapy
Source: Front Immunol. 2021 Sep 27;12:746168. doi: 10.3389/fimmu.2021.746168 (PMC8503648; doi:10.3389/fimmu.2021.746168)
Supplement: Supplementary Data Sheet 4 — Exclusive proteins list for each cell line. [file DataSheet_4.xlsx]

## Sheet: Feuil1
Proteins found in 70% of the 50 patients (Drelich et al., 2020)			Not in CSPA GBM
Exclusive Astrocytes				Exclusive NCH82				Exclusive U87				Common NCH82 & U87
Majority protein IDs	Protein names	Gene names		Majority protein IDs	Protein names	Gene names		Majority protein IDs	Protein names	Gene names		Majority protein IDs	Protein names	Gene names
O00468	Agrin;Agrin N-terminal 110 kDa subunit;Agrin C-terminal 110 kDa subunit;Agrin C-terminal 90 kDa fragment;Agrin C-terminal 22 kDa fragment	AGRN		A7MBM2	Protein dispatched homolog 2	DISP2		A6NFQ2	TRPM8 channel-associated factor 2	TCAF2		O00478	Butyrophilin subfamily 3 member A3	BTN3A3
O14745	Na(+)/H(+) exchange regulatory cofactor NHE-RF1	SLC9A3R1		O75054	Immunoglobulin superfamily member 3	IGSF3		O15484	Calpain-5	CAPN5		O00481	Butyrophilin subfamily 3 member A1	BTN3A1
P02787	Serotransferrin	TF		P19320	Vascular cell adhesion protein 1	VCAM1		O75578	Integrin alpha-10	ITGA10		O15118	Niemann-Pick C1 protein	NPC1
P11047	Laminin subunit gamma-1	LAMC1		P28300	Protein-lysine 6-oxidase	LOX		P01903	HLA class II histocompatibility antigen, DR alpha chain	HLA-DRA		O15260	Surfeit locus protein 4	SURF4
P14923	Junction plakoglobin	JUP		P32004	Neural cell adhesion molecule L1	L1CAM		P01911	HLA class II histocompatibility antigen, DRB1-15 beta chain	HLA-DRB1		O15294	UDP-N-acetylglucosamine--peptide N-acetylglucosaminyltransferase 110 kDa subunit	OGT
P35556	Fibrillin-2	FBN2		P32455	Interferon-induced guanylate-binding protein 1	GBP1		P04062	Glucosylceramidase	GBA		O15460	Prolyl 4-hydroxylase subunit alpha-2	P4HA2
P56159	GDNF family receptor alpha-1	GFRA1		P55287	Cadherin-11	CDH11		P11362	Fibroblast growth factor receptor 1;Fibroblast growth factor receptor 3;Fibroblast growth factor receptor 4	FGFR1;FGFR3;FGFR4		O60353	Frizzled-6	FZD6
Q8IV08	Phospholipase D3	PLD3		Q02297	Pro-neuregulin-1, membrane-bound isoform;Neuregulin-1	NRG1		P20333	Tumor necrosis factor receptor superfamily member 1B;Tumor necrosis factor receptor superfamily member 1b, membrane form;Tumor necrosis factor-binding protein 2	TNFRSF1B		O75326	Semaphorin-7A	SEMA7A
Q8N126	Cell adhesion molecule 3	CADM3		Q14699	Raftlin	RFTN1		P25445	Tumor necrosis factor receptor superfamily member 6	FAS		O95210	Starch-binding domain-containing protein 1	STBD1
Q8NFZ8	Cell adhesion molecule 4	CADM4		Q15223	Nectin-1	PVRL1		P35813	Protein phosphatase 1A	PPM1A		O95477	ATP-binding cassette sub-family A member 1	ABCA1
Q92823	Neuronal cell adhesion molecule	NRCAM		Q32P28	Prolyl 3-hydroxylase 1	LEPRE1		P41221	Protein Wnt-5a	WNT5A		P00749	Urokinase-type plasminogen activator;Urokinase-type plasminogen activator long chain A;Urokinase-type plasminogen activator short chain A;Urokinase-type plasminogen activator chain B	PLAU
				Q5JRA6	Melanoma inhibitory activity protein 3	MIA3		P41440	Folate transporter 1	SLC19A1		P07204	Thrombomodulin	THBD
				Q96KA5	Cleft lip and palate transmembrane protein 1-like protein	CLPTM1L		P49023	Paxillin	PXN		P07237	Protein disulfide-isomerase	P4HB
				Q96RF0	Sorting nexin-18	SNX18		P57087	Junctional adhesion molecule B	JAM2		P07711	Cathepsin L1;Cathepsin L1 heavy chain;Cathepsin L1 light chain	CTSL
				Q99715	Collagen alpha-1(XII) chain	COL12A1		Q00013	55 kDa erythrocyte membrane protein	MPP1		P09110	3-ketoacyl-CoA thiolase, peroxisomal	ACAA1
				Q9BX79	Stimulated by retinoic acid gene 6 protein homolog	STRA6		Q03135	Caveolin-1	CAV1		P10646	Tissue factor pathway inhibitor	TFPI
				Q9BXP2	Solute carrier family 12 member 9	SLC12A9		Q13418	Integrin-linked protein kinase	ILK		P12109	Collagen alpha-1(VI) chain	COL6A1
				Q9BY67	Cell adhesion molecule 1	CADM1		Q13449	Limbic system-associated membrane protein	LSAMP		P12110	Collagen alpha-2(VI) chain	COL6A2
				Q9HBL0	Tensin-1	TNS1		Q13671	Ras and Rab interactor 1	RIN1		P12111	Collagen alpha-3(VI) chain	COL6A3
				Q9Y6C2	EMILIN-1	EMILIN1		Q14643	Inositol 1,4,5-trisphosphate receptor type 1	ITPR1		P13591	Neural cell adhesion molecule 1	NCAM1
				Q9Y6I3	Epsin-1	EPN1		Q15743	Ovarian cancer G-protein coupled receptor 1	GPR68		P14384	Carboxypeptidase M	CPM
								Q53TN4	Cytochrome b reductase 1	CYBRD1		P17813	Endoglin	ENG
								Q6ZMC9	Sialic acid-binding Ig-like lectin 15	SIGLEC15		P22413	Ectonucleotide pyrophosphatase/phosphodiesterase family member 1;Alkaline phosphodiesterase I;Nucleotide pyrophosphatase	ENPP1
								Q6ZVL6	UPF0606 protein KIAA1549L	KIAA1549L		P30825	High affinity cationic amino acid transporter 1	SLC7A1
								Q8NCL9	Protein APCDD1-like	APCDD1L		P43308	Translocon-associated protein subunit beta	SSR2
								Q8WUM9	Sodium-dependent phosphate transporter 1	SLC20A1		P48060	Glioma pathogenesis-related protein 1	GLIPR1
								Q9HD45	Transmembrane 9 superfamily member 3	TM9SF3		P48509	CD151 antigen	CD151
								Q9Y4C2	TRPM8 channel-associated factor 1	TCAF1		P53618	Coatomer subunit beta	COPB1
								Q9Y5X1	Sorting nexin-9	SNX9		P54920	Alpha-soluble NSF attachment protein	NAPA
								Q9Y653	G-protein coupled receptor 56;GPR56 N-terminal fragment;GPR56 C-terminal fragment	GPR56		P63244	Guanine nucleotide-binding protein subunit beta-2-like 1;Guanine nucleotide-binding protein subunit beta-2-like 1, N-terminally processed	GNB2L1
												P78536	Disintegrin and metalloproteinase domain-containing protein 17	ADAM17
												Q04771	Activin receptor type-1	ACVR1
												Q07021	Complement component 1 Q subcomponent-binding protein, mitochondrial	C1QBP
												Q08357	Sodium-dependent phosphate transporter 2	SLC20A2
												Q08380	Galectin-3-binding protein	LGALS3BP
												Q08722	Leukocyte surface antigen CD47	CD47
												Q13332	Receptor-type tyrosine-protein phosphatase S	PTPRS
												Q13586	Stromal interaction molecule 1	STIM1
												Q15125	3-beta-hydroxysteroid-Delta(8),Delta(7)-isomerase	EBP
												Q16790	Carbonic anhydrase 9	CA9
												Q16832	Discoidin domain-containing receptor 2	DDR2
												Q24JP5	Transmembrane protein 132A	TMEM132A
												Q30201	Hereditary hemochromatosis protein	HFE
												Q4V9L6	Transmembrane protein 119	TMEM119
												Q6NSJ5	Volume-regulated anion channel subunit LRRC8E	LRRC8E
												Q6PJF5	Inactive rhomboid protein 2	RHBDF2
												Q6UXD5	Seizure 6-like protein 2	SEZ6L2
												Q7Z3C6	Autophagy-related protein 9A	ATG9A
												Q8TB96	T-cell immunomodulatory protein	ITFG1
												Q8TDW0	Volume-regulated anion channel subunit LRRC8C	LRRC8C
												Q8TF66	Leucine-rich repeat-containing protein 15	LRRC15
												Q92536	Y+L amino acid transporter 2	SLC7A6
												Q92542	Nicastrin	NCSTN
												Q92544	Transmembrane 9 superfamily member 4	TM9SF4
												Q92597	Protein NDRG1	NDRG1
												Q92692	Nectin-2	PVRL2
												Q93050	V-type proton ATPase 116 kDa subunit a isoform 1	ATP6V0A1
												Q969V3	Nicalin	NCLN
												Q96HA4	Uncharacterized protein C1orf159	C1orf159
												Q99747	Gamma-soluble NSF attachment protein	NAPG
												Q9BQ51	Programmed cell death 1 ligand 2	PDCD1LG2
												Q9BXS9	Solute carrier family 26 member 6	SLC26A6
												Q9NPR2	Semaphorin-4B	SEMA4B
												Q9NZQ7	Programmed cell death 1 ligand 1	CD274
												Q9UHE8	Metalloreductase STEAP1	STEAP1
												Q9UN70	Protocadherin gamma-C3	PCDHGC3
												Q9UNK0	Syntaxin-8	STX8
												Q9UPN3	Microtubule-actin cross-linking factor 1, isoforms 1/2/3/5	MACF1
												Q9Y5V3	Melanoma-associated antigen D1	MAGED1
