# Supplementary material for: Surfaceome Proteomic of Glioblastoma Revealed Potential Targets for Immunotherapy
Source: Front Immunol. 2021 Sep 27;12:746168. doi: 10.3389/fimmu.2021.746168 (PMC8503648; doi:10.3389/fimmu.2021.746168)
Supplement: Supplementary Table 1 — Expression in healthy and cancers tissues of surface proteins over-expressed or exclusive to GBM cell lines according to Human Protein Atlas. [file Table_1.xlsx]

## Sheet: Feuil1
Gene names Healthy tissues	Brain	Endocrine tissues	Lung	Gastrointestinal tract	Liver & gallbladder	Pancreas	Kidney & urinary bladder	Male tissues	Female tissues	Skin	Bone marrow & lymphoid tissues
ABCA1
ACAA1
ACVR1
ADAM17
ASPH
ATG9A
ATP6V0A1
BTN3A1
BTN3A3
C1orf159
C1QBP
CA9
CD151
CD274
CD47
COL6A1
COL6A2
COL6A3
COPB1
CPM
CTSL
CYBA - Mutation V174A
CYBRD1 - Mutation S266N
DDR2
EBP
EGFR - Mutation N1184D
ENG
ENPP1
FZD6
GLIPR1
GNB2L1
HFE
HLA-A - Mutation I166T
HLA-B - Mutation T162K
HLA-DPB1 - Mutation A65V
HSPD1
ITFG1
ITGB3 - Mutation N597D
ITPR1
LGALS3BP
LRRC15
LRRC8C
LRRC8E
MACF1
MAGED1
NAPA
NAPG
NCAM1
NCLN
NCSTN
NDRG1
NOTCH2
NPC1
OGT
P4HA2
P4HB
PCDHGC3
PDCD1LG2
PLAU
PLAUR - Mutation R159H
PROCR
PTGFRN
PTPRS
PVRL2
RELL1 - Mutation N255D
RHBDF2
SEMA4B
SEMA7A
SEZ6L2
SLC20A2
SLC25A13
SLC26A6
SLC7A1
SLC7A6
SSR2
STBD1
STEAP1
STIM1
STX8
SURF4
TFPI
THBD
TM9SF4
TMEM119
TMEM132A
TPBG
TUBA4A
Gene names Cancers	Glioma	Thyroid cancer	Lung cancer	Colorectal, head & neck, stomach cancer	Liver cancer	Carcinoid, pancreatic cancer	Renal, Urothelial cancer	Prostate, testis cancer	Breast, endometrial, ovarian cancer	Melanoma, skin cancer	Lymphoma
	At least expressed by 30% patients for cancers
	At least medium expression for healthy tissues
