# Supplementary material for: Surfaceome Proteomic of Glioblastoma Revealed Potential Targets for Immunotherapy
Source: Front Immunol. 2021 Sep 27;12:746168. doi: 10.3389/fimmu.2021.746168 (PMC8503648; doi:10.3389/fimmu.2021.746168)
Supplement: Supplementary Table 2 — Drug candidates targeting genes specific to glioma and existing therapeutic clinical trials in glioma patients. [file Table_2.xlsx]

## Sheet: Feuil2
Gene names	Glioma	Highly specific to glioma	Druggable		Table S2 : Drug candidates targeting genes specific to glioma and existing therapeutic clinical trials in glioma patients
ACVR1					Drugs shown in the table are considered to be drugs by Drug Central, DrugBank, ApexBio, DGIdb, FDA Approved Drugs, ClinicalTrials.gov, and/or PharmGKB.
BTN3A1
C1orf159			no
CA9					Genes specific to glioma	Drug/ Compound	Therapeutic trials in glioma	NCT Number	Trial Phases	Trial status	Study Results	Study title
CD151			no		CPM	dopamine	yes with antagonist	NCT04732065	Phase 1	Not yet recruiting	No Results Available	ONC206 for Treatment of Newly Diagnosed, or Recurrent Diffuse Midline Gliomas, and Other Recurrent Malignant Brain Tumors (PNOC 023)
CD274								NCT04224441	Phase 2	Recruiting	No Results Available	Repurposing Chlorpromazine in the Treatment of Glioblastoma
COL6A1								NCT01430351	Phase 1	Active, not recruiting	No Results Available	Temozolomide, Memantine Hydrochloride, Mefloquine, and Metformin Hydrochloride in Treating Patients With Glioblastoma Multiforme After Radiation Therapy
COL6A2
COL6A3						Serotonin	yes with antagonist	NCT02770378	Phase 1|Phase 2	Active, not recruiting	No Results Available	A Proof-of-concept Clinical Trial Assessing the Safety of the Coordinated Undermining of Survival Paths by 9 Repurposed Drugs Combined With Metronomic Temozolomide (CUSP9v3 Treatment Protocol) for Recurrent Glioblastoma
CPM			yes			Norepinephrine	no
CTSL						Pregabalin	no
CYBA - Mutation V174A			yes			Cobalt	no
CYBRD1 - Mutation S266N
EBP					CYBA	Doxorubicin	yes	NCT00002608	Phase 2	Completed	No Results Available	Combination Chemotherapy and Tamoxifen in Treating Patients With Solid Tumors
EGFR - Mutation N1184D			yes					NCT00019630	Phase 1	Completed	No Results Available	Liposomal Doxorubicin in Treating Children With Refractory Solid Tumors
ENG								NCT00944801	Phase 1|Phase 2	Completed	No Results Available	Pegylated Liposomal Doxorubicine and Prolonged Temozolomide in Addition to Radiotherapy in Newly Diagnosed Glioblastoma
ENPP1								NCT02758366	Phase 2	Terminated	No Results Available	Prolonged Exposure to Doxorubicin in Patients With Glioblastoma Multiforme and Diffuse Intrinsic Pontine Glioma
HLA-A - Mutation I166T			yes					NCT02766699	Phase 1	Recruiting	No Results Available	A Study to Evaluate the Safety, Tolerability and Immunogenicity of EGFR(V)-EDV-Dox in Subjects With Recurrent Glioblastoma Multiforme (GBM)
HLA-B - Mutation T162K			yes					NCT02861222	Phase 1	Completed	No Results Available	Myocet® in Children With Relapsed or Refractory Non-brainstem Malignant Glioma
HLA-DPB1 - Mutation A65V								NCT03603379	Phase 1	Completed	No Results Available	Doxorubicin-loaded Anti-EGFR-immunoliposomes (C225-ILs-dox) in High-grade Gliomas
HSPD1			yes					NCT03678883	Phase 1|Phase 2	Recruiting	No Results Available	9-ING-41 in Patients With Advanced Cancers
ITGB3 - Mutation N597D						Dextromethorphan	no
LGALS3BP			no			Idarubicin	no
P4HA2			yes			Simvastatin	no
PLAU						NADPH	no
PLAUR - Mutation R159H
PROCR					EGFR*	afatinib	yes	NCT00727506	Phase 2	Completed	Has Results	BIBW 2992 (Afatinib) With or Without Daily Temozolomide in the Treatment of Patients With Recurrent Malignant Glioma
PVRL2								NCT02465060	Phase 2	Recruiting	No Results Available	Targeted Therapy Directed by Genetic Testing in Treating Patients With Advanced Refractory Solid Tumors, Lymphomas, or Multiple Myeloma (The MATCH Screening Trial)
RELL1 - Mutation N255D								NCT00977431	Phase 1	Completed	Has Results	Open Label Trial to Explore Safety of Combining Afatinib (BIBW 2992) and Radiotherapy With or Without Temozolomide in Newly Diagnosed Glioblastoma Multiform
RHBDF2								NCT02423525	Phase 1	Active, not recruiting	No Results Available	Safety Study of Afatinib for Brain Cancer
SLC7A1
SLC7A6						axitinib	yes	NCT03291314	Phase 2	Completed	No Results Available	Clinical Trial on the Combination of Avelumab and Axitinib for the Treatment of Patients With Recurrent Glioblastoma
SURF4								NCT01562197	Phase 2	Completed	No Results Available	A Randomized Phase II Clinical Trial on the Efficacy of Axitinib as a Monotherapy or in Combination With Lomustine for the Treatment of Patients With Recurrent Glioblastoma
THBD
						cetuximab	yes	NCT01884740	Phase 1|Phase 2	Recruiting	No Results Available	Intraarterial Infusion Of Erbitux and Bevacizumab For Relapsed/Refractory Intracranial Glioma In Patients Under 22
								NCT00463073	Phase 2	Completed	No Results Available	Cetuximab, Bevacizumab and Irinotecan for Patients With Malignant Glioblastomas
								NCT03603379	Phase 1	Completed	No Results Available	Doxorubicin-loaded Anti-EGFR-immunoliposomes (C225-ILs-dox) in High-grade Gliomas
								NCT02800486	Phase 2	Recruiting	No Results Available	Super Selective Intra-arterial Repeated Infusion of Cetuximab (Erbitux) With Reirradiation for Treatment of Relapsed/Refractory GBM, AA, and AOA
								NCT01238237	Phase 1	Completed	No Results Available	Super-Selective Intraarterial Cerebral Infusion of Cetuximab (Erbitux) for Treatment of Relapsed/Refractory GBM and AA
								NCT01012609	Phase 2	Active, not recruiting	Has Results	External Beam Radiation Therapy and Cetuximab Followed by Irinotecan and Cetuximab for Children and Young Adults With Newly Diagnosed Diffuse Pontine Tumors and High-Grade Astrocytomas
						erlotinib	yes	NCT00418327	Phase 1	Completed	No Results Available	Safety Study of Tarceva in Children With Refractory and Relapsed Malignant Brain Tumors and Newly Diagnosed Brain Stem Glioma
								NCT01257594	Phase 1	Completed	No Results Available	EGFR Inhibition Using Weekly Erlotinib for Recurrent Malignant Gliomas
								NCT00671970	Phase 2	Completed	Has Results	Phase (Ph) II Bevacizumab + Erlotinib for Patients (Pts) With Recurrent Malignant Glioma (MG)
								NCT00509431	Phase 1	Completed	No Results Available	Erlotinib and Sirolimus in Treating Patients With Recurrent Malignant Glioma
								NCT00124657	Phase 1|Phase 2	Completed	Has Results	Erlotinib and Radiation Therapy in Treating Young Patients With Newly Diagnosed Glioma
								NCT00672243	Phase 2	Completed	Has Results	Ph II Erlotinib + Sirolimus for Pts w Recurrent Malignant Glioma Multiforme
								NCT00337883	Phase 2	Completed	No Results Available	A Study of the Safety and Efficacy of Tarceva in Patients With First Relapse of Grade IV Glioma (Glioblastoma Multiforme)
								NCT00112736	Phase 1|Phase 2	Completed	Has Results	Erlotinib and Temsirolimus in Treating Patients With Recurrent Malignant Glioma
								NCT00045110	Phase 1|Phase 2	Completed	Has Results	Erlotinib in Treating Patients With Recurrent Malignant Glioma or Recurrent or Progressive Meningioma
								NCT00609999	Phase 1	Completed	No Results Available	Ph I Dasatinib + Erlotinib in Recurrent MG
								NCT00301418	Phase 1|Phase 2	Completed	Has Results	Oral Tarceva Study for Recurrent/Residual Glioblastoma Multiforme and Anaplastic Astrocytoma
								NCT00720356	Phase 2	Completed	Has Results	Bevacizumab and Erlotinib After Radiation Therapy and Temozolomide in Treating Patients With Newly Diagnosed Glioblastoma Multiforme or Gliosarcoma
								NCT00274833	Phase 2	Completed	No Results Available	Radiation Therapy, Temozolomide, and Erlotinib in Treating Patients With Newly Diagnosed Glioblastoma Multiforme
								NCT00445588	Phase 2	Completed	Has Results	Erlotinib and Sorafenib in Treating Patients With Progressive or Recurrent Glioblastoma Multiforme
								NCT00039494	Phase 2	Completed	No Results Available	Erlotinib and Temozolomide With Radiation Therapy in Treating Patients With Glioblastoma Multiforme or Other Brain Tumors
								NCT00187486	Phase 2	Completed	Has Results	Safety and Efficacy Study of Tarceva, Temodar, and Radiation Therapy in Patients With Newly Diagnosed Brain Tumors
								NCT00077454	Phase 1	Completed	No Results Available	Erlotinib and Temozolomide in Treating Young Patients With Recurrent or Refractory Solid Tumors
								NCT00335764	Phase 1|Phase 2	Completed	Has Results	Sorafenib Combined With Erlotinib, Tipifarnib, or Temsirolimus in Treating Patients With Recurrent Glioblastoma Multiforme or Gliosarcoma
								NCT00086879	Phase 2	Completed	No Results Available	Erlotinib Compared With Temozolomide or Carmustine in Treating Patients With Recurrent Glioblastoma Multiforme
								NCT00525525	Phase 2	Completed	Has Results	Study of Bevacizumab Plus Temodar and Tarceva in Patients With Glioblastoma or Gliosarcoma
						gefitinib	yes	NCT00042991	Phase 1|Phase 2	Completed	Has Results	Gefitinib and Radiation Therapy in Treating Children With Newly Diagnosed Gliomas
								NCT00027625	Phase 1	Completed	No Results Available	Gefitinib Plus Temozolomide in Treating Patients With Malignant Primary Glioma
								NCT00025675	Phase 2	Completed	No Results Available	Gefitinib in Treating Patients With Recurrent or Progressive CNS Tumors
								NCT00052208	Phase 1|Phase 2	Completed	No Results Available	Gefitinib and Radiation Therapy in Treating Patients With Glioblastoma Multiforme
								NCT00014170	Phase 2	Completed	No Results Available	Gefitinib in Treating Patients With Newly Diagnosed Glioblastoma Multiforme
								NCT00085566	Phase 1|Phase 2	Completed	Has Results	Everolimus and Gefitinib in Treating Patients With Progressive Glioblastoma Multiforme or Progressive Metastatic Prostate Cancer
								NCT00238797	Phase 2	Completed	No Results Available	A Phase II Exploratory, Multicentre, Open-label, Non-comparative Study of ZD1839 (Iressa) and Radiotherapy in the Treatment of Patients With Glioblastoma Multiforme
								NCT00132158	Phase 1	Completed	No Results Available	ZD1839 and Oral Irinotecan in Treating Young Patients With Refractory Solid Tumors
								NCT00016991	Phase 2	Completed	No Results Available	ZD 1839 in Treating Patients With Glioblastoma Multiforme in First Relapse
								NCT00250887	Phase 2	Completed	No Results Available	Pre- and Postoperative Use of ZD1839 (Iressa) in Recurrent Glioblastoma, Including Translational Research
					HLA-A	Vaccines	yes	NCT02358187	Phase 2	Recruiting	No Results Available	A Vaccine Trial for Low Grade Gliomas
								NCT00766753	Phase 1|Phase 2	Completed	Has Results	Vaccination-Dendritic Cells With Peptides for Recurrent Malignant Gliomas
								NCT01130077	Phase 1	Recruiting	No Results Available	A Pilot Study of Glioma Associated Antigen Vaccines in Conjunction With Poly-ICLC in Pediatric Gliomas
								NCT02960230	Phase 1|Phase 2	Recruiting	No Results Available	H3.3K27M Peptide Vaccine With Nivolumab for Children With Newly Diagnosed DIPG and Other Gliomas
								NCT00795457	Early Phase 1	Completed	No Results Available	Effects of Vaccinations With HLA-A2-Restricted Glioma Antigen-Peptides in Combination With Poly-ICLC for Adults With High-Risk WHO Grade II Astrocytomas and Oligo-Astrocytomas
								NCT00874861	Early Phase 1	Completed	No Results Available	HLA-A2-Restricted Glioma Antigen-Peptides Vaccinations With Poly-ICLC for Recurrent WHO Grade II Gliomas
								NCT02924038	Phase 1	Recruiting	No Results Available	A Study of Varlilumab and IMA950 Vaccine Plus Poly-ICLC in Patients With WHO Grade II Low-Grade Glioma (LGG)
								NCT01795313	Phase 1	Recruiting	No Results Available	Immunotherapy for Recurrent Ependymomas in Children Using Tumor Antigen Peptides With Imiquimod
								NCT04842513	Phase 1	Recruiting	No Results Available	Multi Peptide Vaccination With XS15 in Addition to Standard Postoperative Radiation Therapy and Temozolomide Chemotherapy in Newly Diagnosed Glioblastoma
								NCT01280552	Phase 2	Completed	Has Results	A Study of ICT-107 Immunotherapy in Glioblastoma Multiforme (GBM)
								NCT01920191	Phase 1|Phase 2	Completed	No Results Available	Phase I/II Trial of IMA950 Multi-peptide Vaccine Plus Poly-ICLC in Glioblastoma
						Ipilimumab	yes	NCT02829931	Phase 1	Active, not recruiting	No Results Available	Hypofractionated Stereotactic Irradiation With Nivolumab, Ipilimumab and Bevacizumab in Patients With Recurrent High Grade Gliomas
								NCT04323046	Phase 1	Recruiting	No Results Available	Immunotherapy (Nivolumab and Ipilimumab) Before and After Surgery for the Treatment of Recurrent or Progressive High Grade Glioma in Children and Young Adults
								NCT04817254	Phase 2	Not yet recruiting	No Results Available	Association of Peripheral Blood Immunologic Response to Therapeutic Response to Adjuvant Treatment With Immune Checkpoint Inhibition (ICI) in Patients With Newly Diagnosed Glioblastoma or Gliosarcoma
								NCT04606316	Phase 1	Recruiting	No Results Available	Surgical Nivolumab And Ipilimumab For Recurrent GBM
								NCT03233152	Phase 1	Recruiting	No Results Available	Intra-tumoral Ipilimumab Plus Intravenous Nivolumab Following the Resection of Recurrent Glioblastoma
								NCT03367715	Phase 2	Recruiting	No Results Available	Nivolumab, Ipilimumab, and Short-course Radiotherapy in Adults With Newly Diagnosed, MGMT Unmethylated Glioblastoma
								NCT02311920	Phase 1	Active, not recruiting	No Results Available	Ipilimumab and/or Nivolumab in Combination With Temozolomide in Treating Patients With Newly Diagnosed Glioblastoma or Gliosarcoma
								NCT03879512	Phase 1|Phase 2	Recruiting	No Results Available	Autologous Dendritic Cells, Metronomic Cyclophosphamide and Checkpoint Blockade in Children With Relapsed HGG
								NCT02017717	Phase 3	Active, not recruiting	No Results Available	A Study of the Effectiveness and Safety of Nivolumab Compared to Bevacizumab and of Nivolumab With or Without Ipilimumab in Glioblastoma Patients
								NCT04145115	Phase 2	Recruiting	No Results Available	A Study Testing the Effect of Immunotherapy (Ipilimumab and Nivolumab) in Patients With Recurrent Glioblastoma With Elevated Mutational Burden
								NCT04396860	Phase 2|Phase 3	Recruiting	No Results Available	Testing the Use of the Immunotherapy Drugs Ipilimumab and Nivolumab Plus Radiation Therapy Compared to the Usual Treatment (Temozolomide and Radiation Therapy) for Newly Diagnosed MGMT Unmethylated Glioblastoma
								NCT04003649	Phase 1	Recruiting	No Results Available	IL13Ralpha2-Targeted Chimeric Antigen Receptor (CAR) T Cells With or Without Nivolumab and Ipilimumab in Treating Patients With Recurrent or Refractory Glioblastoma
								NCT03493932	Phase 1	Active, not recruiting	No Results Available	Cytokine Microdialysis for Real-Time Immune Monitoring in Glioblastoma Patients Undergoing Checkpoint Blockade
						Carbamazepine	no
						Dapsone	no
						Allopurinol	no
					HLA-B	Acetazolamide	yes	NCT03011671	Phase 1	Recruiting	No Results Available	Study of Acetazolamide With Temozolomide in Adults With Newly Diagnosed or Recurrent Malignant Glioma
						Abacavir	no
						Carbamazepine	no
					HSPD1	Copper	yes	NCT02678975	Phase 2|Phase 3	Completed	No Results Available	Disulfiram in Recurrent Glioblastoma
								NCT03363659	Phase 2	Recruiting	No Results Available	Disulfiram and Copper Gluconate With Temozolomide in Unmethylated Glioblastoma Multiforme
								NCT03034135	Phase 2	Completed	No Results Available	Safety, Tolerability and Efficacy of Disulfiram and Copper Gluconate in Recurrent Glioblastoma
								NCT02715609	Phase 1|Phase 2	Recruiting	No Results Available	Disulfiram/Copper With Concurrent Radiation Therapy and Temozolomide in Patients With Newly Diagnosed Glioblastoma
								NCT00003751	Phase 2	Completed	No Results Available	Penicillamine, Low Copper Diet, and Radiation Therapy in Treating Patients With Glioblastoma
								NCT01907165	Early Phase 1	Completed	No Results Available	Disulfiram in Treating Patients With Glioblastoma Multiforme After Radiation Therapy With Temozolomide
						HSP990 (NVP-HSP990)	no
						Geldanamycin	no
						BIIB021	no
						AT13387	no
					P4HA2	Vitamin C	yes	NCT01891747	Phase 1	Active, not recruiting	No Results Available	A Phase I Study of High-dose L-methylfolate in Combination With Temozolomide and Bevacizumab in Recurrent High Grade Glioma
								NCT02344355	Phase 2	Active, not recruiting	No Results Available	A Phase 2 Trial of High-Dose Ascorbate in Glioblastoma Multiforme
								NCT01752491	Phase 1	Active, not recruiting	No Results Available	A Phase I Trial of High-Dose Ascorbate in Glioblastoma Multiforme
								NCT04900792	Phase 1	Not yet recruiting	No Results Available	A Safety Study of Pharmacologic Ascorbate and Ferumoxytol in Addition to Standard of Care Chemoradiation in Glioblastoma
								NCT04488783	Not Applicable	Recruiting	No Results Available	Potentiation of Chemotherapy in Brain Tumors by Zinc
						Succinic acid	no
					*non exhaustive list of drugs and trials for EGFR target
